# Supplementary material for: Brain Transcriptomic Analysis of Hereditary Cerebral Hemorrhage With Amyloidosis-Dutch Type
Source: Front Aging Neurosci. 2018 Apr 13;10:102. doi: 10.3389/fnagi.2018.00102 (PMC5908973; doi:10.3389/fnagi.2018.00102)
Supplement: Supplementary file 4 [file Data_Sheet_4.XLSX]

## Sheet: HCHWA-D DEG FDR< .05
avgLog2CPM	avgLog2FC	pValue	feature	adj.P.Val	DE	Rank	Contrast	GC	Length	GCtile
5.38515	1.49842	9.81808e-13	HNRNPH3	1.57403e-08	1	1	GroupHCHWA_D	0.404229	2412	2
5.11713	2.2604	6.00691e-12	COL27A1	4.81514e-08	1	2	GroupHCHWA_D	0.613188	7810	8
7.05282	2.66878	4.75442e-11	VEGFA	2.54076e-07	1	3	GroupHCHWA_D	0.522763	3778	6
4.31869	1.39108	1.50946e-10	HIC1	6.0499e-07	1	4	GroupHCHWA_D	0.704759	3194	9
8.35272	2.70505	2.53465e-10	DNAJB1	8.1271e-07	1	5	GroupHCHWA_D	0.566207	2681	7
6.95508	3.10623	6.5638e-10	HSPB1	1.75385e-06	1	6	GroupHCHWA_D	0.643255	897	9
7.30047	1.28654	8.02184e-10	ATN1	1.83723e-06	1	7	GroupHCHWA_D	0.623671	4419	9
6.35931	5.50398	1.59396e-09	HSPA6	3.19431e-06	1	8	GroupHCHWA_D	0.585666	2358	8
7.02022	2.28585	4.23015e-09	DDIT4	7.5353e-06	1	9	GroupHCHWA_D	0.580479	1752	8
7.753	1.10808	6.45249e-09	SKI	1.03446e-05	1	10	GroupHCHWA_D	0.596811	5707	8
1.25455	-2.03962	7.26085e-09	DRD5	1.05824e-05	-1	11	GroupHCHWA_D	0.585859	2376	8
3.08473	2.19666	9.07939e-09	RAB13	1.21301e-05	1	12	GroupHCHWA_D	0.498833	1714	5
4.18304	2.51375	1.05218e-08	ACRC	1.29758e-05	1	13	GroupHCHWA_D	0.467275	3178	4
5.13111	-1.10348	1.27109e-08	TUBGCP5	1.45558e-05	-1	14	GroupHCHWA_D	0.437561	8264	3
9.1288	3.31759	1.52612e-08	HSPA1A	1.63111e-05	1	15	GroupHCHWA_D	0.598106	12145	8
6.02605	1.07393	2.21136e-08	RAB7A	2.21578e-05	1	16	GroupHCHWA_D	0.473566	2232	4
6.23004	1.18705	2.84612e-08	SAT1	2.68406e-05	1	17	GroupHCHWA_D	0.436394	1187	3
4.02953	1.79942	3.36061e-08	CBFA2T3	2.99318e-05	1	18	GroupHCHWA_D	0.611904	4553	8
3.57395	4.05301	3.77563e-08	INHBA	3.18583e-05	1	19	GroupHCHWA_D	0.497011	2175	5
4.66479	2.55515	3.99524e-08	ADM	3.20258e-05	1	20	GroupHCHWA_D	0.559748	1590	7
5.75219	0.875611	4.66005e-08	OTUD4	3.55762e-05	1	21	GroupHCHWA_D	0.385391	7434	1
6.21096	2.0015	5.28436e-08	CHORDC1	3.85086e-05	1	22	GroupHCHWA_D	0.366726	3384	1
4.3888	-0.997885	5.74178e-08	WDR46	4.00227e-05	-1	23	GroupHCHWA_D	0.561405	11815	7
3.45221	2.05782	6.24339e-08	ANGPT2	4.17058e-05	1	24	GroupHCHWA_D	0.383302	5270	1
7.83316	1.60837	7.49681e-08	HNRNPA2B1	4.80755e-05	1	25	GroupHCHWA_D	0.387088	3702	1
7.01996	0.871898	8.15436e-08	ZMYND8	5.0281e-05	1	26	GroupHCHWA_D	0.472517	6404	4
5.7306	-0.839819	9.50326e-08	APEH	5.64283e-05	-1	27	GroupHCHWA_D	0.600073	2758	8
3.64847	-1.15943	1.31865e-07	SLC35B2	7.5502e-05	-1	28	GroupHCHWA_D	0.585521	2362	8
5.66946	1.20838	1.42452e-07	HIVEP3	7.84595e-05	1	29	GroupHCHWA_D	0.551258	14115	7
4.82643	1.13569	1.46818e-07	PRPF38B	7.84595e-05	1	30	GroupHCHWA_D	0.421725	3756	2
2.43804	1.951	1.60778e-07	ZNF852	8.31481e-05	1	31	GroupHCHWA_D	0.452792	1970	4
2.51625	1.86581	1.71039e-07	LOC727896	8.56907e-05	1	32	GroupHCHWA_D	0.361396	3409	1
7.42722	1.58071	1.7656e-07	MKNK2	8.57762e-05	1	33	GroupHCHWA_D	0.618758	3785	9
6.41717	2.89597	1.85224e-07	BAG3	8.73385e-05	1	34	GroupHCHWA_D	0.569872	2569	7
4.90439	1.09967	2.06816e-07	TRA2A	9.47336e-05	1	35	GroupHCHWA_D	0.410922	2234	2
4.66529	1.36141	2.16035e-07	ZFHX2	9.62075e-05	1	36	GroupHCHWA_D	0.590394	9182	8
4.72851	-0.772748	3.01943e-07	PEX16	0.000130831	-1	37	GroupHCHWA_D	0.634172	1908	9
4.45644	0.936875	3.28253e-07	EHD2	0.000138488	1	38	GroupHCHWA_D	0.615513	3584	8
3.65595	1.79286	3.48103e-07	RCC1	0.000143097	1	39	GroupHCHWA_D	0.527585	3027	6
3.72489	1.75354	3.75581e-07	MSX1	0.000146031	1	40	GroupHCHWA_D	0.59938	1937	8
7.25055	-0.961983	3.83513e-07	TUBB	0.000146031	-1	41	GroupHCHWA_D	0.537073	24937	6
4.18647	2.59746	3.91365e-07	GBP2	0.000146031	1	42	GroupHCHWA_D	0.419409	4132	2
4.68286	0.973059	3.91676e-07	BTG1	0.000146031	1	43	GroupHCHWA_D	0.386966	4680	1
4.87558	1.40401	4.3476e-07	P4HA2	0.000158411	1	44	GroupHCHWA_D	0.530499	2705	6
4.05959	1.25986	4.53549e-07	PRRX1	0.000161584	1	45	GroupHCHWA_D	0.403095	4071	2
8.05485	1.24424	4.80891e-07	SHANK1	0.000167601	1	46	GroupHCHWA_D	0.688544	6643	9
4.16718	1.1262	4.95726e-07	BACE2	0.000169095	1	47	GroupHCHWA_D	0.477716	8930	5
7.41791	1.05145	5.44903e-07	ZMIZ1	0.000179752	1	48	GroupHCHWA_D	0.577366	7555	8
6.51428	1.16206	5.60224e-07	SNTB2	0.000179752	1	49	GroupHCHWA_D	0.416539	9771	2
5.06432	3.45923	5.60605e-07	TIMP1	0.000179752	1	50	GroupHCHWA_D	0.584061	916	8
6.0446	2.83041	5.88927e-07	SERPINH1	0.000185131	1	51	GroupHCHWA_D	0.592672	2320	8
3.94646	1.17766	6.51093e-07	MOB3A	0.000200737	1	52	GroupHCHWA_D	0.580006	3331	8
4.38486	1.71652	6.79641e-07	WBP5	0.000205585	1	53	GroupHCHWA_D	0.369146	1089	1
8.85005	1.54554	7.42502e-07	HSPH1	0.00021361	1	54	GroupHCHWA_D	0.412432	5727	2
7.25079	-0.658673	7.52058e-07	NDUFV1	0.00021361	-1	55	GroupHCHWA_D	0.610668	1631	8
4.36181	1.12254	7.54843e-07	SUZ12P1	0.00021361	1	56	GroupHCHWA_D	0.451923	728	4
7.67541	1.18933	7.59466e-07	SLC7A5	0.00021361	1	57	GroupHCHWA_D	0.61149	4543	8
6.00025	0.967228	8.06869e-07	SMG7	0.000219929	1	58	GroupHCHWA_D	0.490125	6076	5
6.07909	1.48762	8.09369e-07	DNAJB4	0.000219929	1	59	GroupHCHWA_D	0.3384	2237	1
7.77756	-0.732163	8.30048e-07	PFKM	0.000221673	-1	60	GroupHCHWA_D	0.518179	3823	6
3.34745	2.26587	8.43442e-07	WFIKKN1	0.000221673	1	61	GroupHCHWA_D	0.700205	1948	9
6.21845	1.05632	8.78857e-07	GSE1	0.000227255	1	62	GroupHCHWA_D	0.547456	7586	7
2.84028	2.46752	9.38211e-07	G0S2	0.000238752	1	63	GroupHCHWA_D	0.578401	963	8
4.38378	1.27935	1.08623e-06	GLIS3	0.000269329	1	64	GroupHCHWA_D	0.491567	7767	5
8.51695	-0.823167	1.09197e-06	ATP5A1	0.000269329	-1	65	GroupHCHWA_D	0.498353	2428	5
5.1084	3.94232	1.11129e-06	RRAD	0.000269942	1	66	GroupHCHWA_D	0.650407	1476	9
9.53845	-0.657064	1.17513e-06	SORL1	0.000281189	-1	67	GroupHCHWA_D	0.477171	10973	5
1.95572	-1.38222	1.20025e-06	LOC100289495	0.000282326	-1	68	GroupHCHWA_D	0.414278	3908	2
5.02386	0.902996	1.2151e-06	BCL9L	0.000282326	1	69	GroupHCHWA_D	0.635483	7739	9
5.80444	1.15243	1.27738e-06	KIAA1522	0.00029197	1	70	GroupHCHWA_D	0.617553	5606	9
3.7745	1.06669	1.29303e-06	SERPING1	0.00029197	1	71	GroupHCHWA_D	0.545134	1983	7
8.14182	-0.689309	1.41618e-06	LRP1B	0.00030956	-1	72	GroupHCHWA_D	0.422358	16531	3
4.45887	0.938963	1.42207e-06	SETD8	0.00030956	1	73	GroupHCHWA_D	0.498728	2751	5
6.8121	-0.832652	1.43658e-06	OGDHL	0.00030956	-1	74	GroupHCHWA_D	0.587188	3762	8
8.26197	1.66357	1.45313e-06	VIM	0.00030956	1	75	GroupHCHWA_D	0.541667	2136	7
5.80486	0.873345	1.46748e-06	ZNF395	0.00030956	1	76	GroupHCHWA_D	0.534777	4802	6
4.30502	-0.938893	1.57974e-06	NMRAL1	0.00032624	-1	77	GroupHCHWA_D	0.596848	3046	8
6.60851	0.921827	1.61943e-06	BRD4	0.00032624	1	78	GroupHCHWA_D	0.584463	7453	8
3.84947	1.62419	1.62706e-06	PRELP	0.00032624	1	79	GroupHCHWA_D	0.539612	5819	6
7.2287	-0.558262	1.62794e-06	KIAA0232	0.00032624	-1	80	GroupHCHWA_D	0.422044	7857	2
5.51089	1.32556	1.78423e-06	ZFP36L1	0.000350777	1	81	GroupHCHWA_D	0.517079	4040	6
7.60612	-0.627846	1.81637e-06	ARFGEF2	0.000350777	-1	82	GroupHCHWA_D	0.441359	9004	3
3.69188	1.24464	1.82604e-06	GPER1	0.000350777	1	83	GroupHCHWA_D	0.61194	3082	8
6.98153	-1.0934	1.8379e-06	SVOP	0.000350777	-1	84	GroupHCHWA_D	0.508794	6425	6
5.43369	-0.840858	1.87146e-06	SLC25A11	0.000352857	-1	85	GroupHCHWA_D	0.588852	1812	8
7.49103	1.17723	1.90128e-06	FOSL2	0.000352857	1	86	GroupHCHWA_D	0.601604	3991	8
3.62274	1.03146	1.92657e-06	UBALD1	0.000352857	1	87	GroupHCHWA_D	0.663836	1413	9
6.878	-0.689413	1.95181e-06	ARFGAP2	0.000352857	-1	88	GroupHCHWA_D	0.579749	3022	8
9.19665	2.58277	1.95885e-06	HSPA1B	0.000352857	1	89	GroupHCHWA_D	0.587731	12601	8
7.1927	1.78277	1.98479e-06	CRYAB	0.000353558	1	90	GroupHCHWA_D	0.519852	1083	6
5.43638	3.95047	2.05971e-06	PDYN	0.000362871	1	91	GroupHCHWA_D	0.502159	3011	5
6.43186	1.07093	2.1222e-06	TSHZ1	0.000369817	1	92	GroupHCHWA_D	0.542937	5380	7
3.87947	1.37478	2.15711e-06	HEBP2	0.000371857	1	93	GroupHCHWA_D	0.520281	1282	6
5.40288	1.14498	2.46786e-06	PLOD2	0.000420902	1	94	GroupHCHWA_D	0.403548	4059	2
6.51812	1.97205	2.56736e-06	IGSF9B	0.000433262	1	95	GroupHCHWA_D	0.62253	4758	9
5.12759	-0.684079	2.61046e-06	NDUFAB1	0.000435946	-1	96	GroupHCHWA_D	0.485757	667	5
5.40194	1.14611	2.66602e-06	SLC12A7	0.000440635	1	97	GroupHCHWA_D	0.610765	10608	8
9.65348	1.90894	2.74868e-06	NEAT1	0.000449661	1	98	GroupHCHWA_D	0.44057	22741	3
7.07368	-0.637987	2.86077e-06	ADRBK2	0.000463272	-1	99	GroupHCHWA_D	0.424848	9055	3
8.73161	-0.783505	2.90481e-06	CLASP2	0.000465699	-1	100	GroupHCHWA_D	0.418111	7675	2
5.94996	1.33221	3.01042e-06	JMJD6	0.000477852	1	101	GroupHCHWA_D	0.499912	5713	5
3.76219	2.21	3.09185e-06	LOC100130238	0.000482093	1	102	GroupHCHWA_D	0.610008	3877	8
4.73087	1.0613	3.09728e-06	BCCIP	0.000482093	1	103	GroupHCHWA_D	0.403202	3373	2
5.18764	1.16807	3.21977e-06	SLC30A1	0.00049634	1	104	GroupHCHWA_D	0.498018	2018	5
5.93394	1.93377	3.42452e-06	MIR4697HG	0.000522875	1	105	GroupHCHWA_D	0.500377	5306	5
5.10802	-0.781531	3.49399e-06	FECH	0.000527154	-1	106	GroupHCHWA_D	0.443391	7278	3
2.0129	2.02735	3.5183e-06	SAP25	0.000527154	1	107	GroupHCHWA_D	0.668263	835	9
3.0509	1.47251	3.57018e-06	DOK3	0.000529973	1	108	GroupHCHWA_D	0.607123	3538	8
2.82656	1.11128	3.62502e-06	LOC100128398	0.000533178	1	109	GroupHCHWA_D	0.462309	1897	4
2.78199	1.80755	3.68015e-06	FAM153C	0.000536366	1	110	GroupHCHWA_D	0.506964	1077	5
2.36724	1.85621	3.89394e-06	PRR34-AS1	0.000562411	1	111	GroupHCHWA_D	0.450153	1635	4
5.6334	1.60763	3.94271e-06	MT2A	0.000564371	1	112	GroupHCHWA_D	0.563246	419	7
4.07548	1.81877	4.38569e-06	FAM153B	0.000622225	1	113	GroupHCHWA_D	0.531215	1794	6
4.64303	0.893357	4.42816e-06	PHF10	0.000622739	1	114	GroupHCHWA_D	0.465033	1673	4
5.56133	1.056	4.49207e-06	ZBTB1	0.00062314	1	115	GroupHCHWA_D	0.34686	5668	1
7.13377	-0.606622	4.53654e-06	USP5	0.00062314	-1	116	GroupHCHWA_D	0.577429	3190	8
5.60412	1.20441	4.54762e-06	YAP1	0.00062314	1	117	GroupHCHWA_D	0.434081	5704	3
5.38102	1.55499	4.82542e-06	KDM6B	0.000655603	1	118	GroupHCHWA_D	0.623807	6704	9
6.59145	-1.00848	5.08876e-06	TUBA4A	0.000685571	-1	119	GroupHCHWA_D	0.579923	2590	8
5.40984	1.86508	5.1506e-06	RGS2	0.00068777	1	120	GroupHCHWA_D	0.415556	1350	2
5.54519	-0.898004	5.21723e-06	PCYT2	0.00068777	-1	121	GroupHCHWA_D	0.648039	3901	9
8.35066	-0.734178	5.23378e-06	APBB1	0.00068777	-1	122	GroupHCHWA_D	0.618086	3616	9
2.33219	1.75113	5.31485e-06	CDKN2B	0.000689374	1	123	GroupHCHWA_D	0.451556	3984	4
8.04155	0.830137	5.37343e-06	ANKRD11	0.000689374	1	124	GroupHCHWA_D	0.571764	10207	7
7.21633	0.833756	5.37498e-06	MAPK4	0.000689374	1	125	GroupHCHWA_D	0.555954	4736	7
4.15209	-0.734254	5.5193e-06	FAM149A	0.000702266	-1	126	GroupHCHWA_D	0.512574	2704	6
3.83154	1.15802	5.87103e-06	ING2	0.000741136	1	127	GroupHCHWA_D	0.427831	2702	3
5.79699	0.897849	5.94585e-06	EIF5B	0.000744718	1	128	GroupHCHWA_D	0.397403	4698	2
7.00609	0.699308	6.03842e-06	RAI1	0.00075045	1	129	GroupHCHWA_D	0.640731	7660	9
3.18249	-1.3109	6.1419e-06	CNTN6	0.000757437	-1	130	GroupHCHWA_D	0.423127	3831	3
3.91087	1.00758	6.44735e-06	SMNDC1	0.000789037	1	131	GroupHCHWA_D	0.381469	2029	1
6.78386	-0.741783	6.71096e-06	UQCRC1	0.000808988	-1	132	GroupHCHWA_D	0.584416	1617	8
3.32714	1.70233	6.71129e-06	SIX4	0.000808988	1	133	GroupHCHWA_D	0.419283	6275	2
5.22383	-0.788329	6.99156e-06	MCM4	0.000836483	-1	134	GroupHCHWA_D	0.499288	4915	5
6.89226	1.20656	7.12198e-06	PTMS	0.000845774	1	135	GroupHCHWA_D	0.658261	1150	9
6.20798	0.827003	7.37797e-06	SRRT	0.000869732	1	136	GroupHCHWA_D	0.58361	3014	8
8.25736	1.37422	7.60828e-06	HSPA5	0.000890335	1	137	GroupHCHWA_D	0.463224	3970	4
6.40837	0.711704	9.10474e-06	PCNP	0.00105015	1	138	GroupHCHWA_D	0.346137	2239	1
8.0971	-0.863558	9.13142e-06	ANXA6	0.00105015	-1	139	GroupHCHWA_D	0.550562	3115	7
5.0021	-0.574987	9.17049e-06	VPS16	0.00105015	-1	140	GroupHCHWA_D	0.575472	2756	7
5.88228	2.15151	9.6677e-06	HAP1	0.00109924	1	141	GroupHCHWA_D	0.599293	3958	8
4.92353	0.987382	9.91497e-06	FOXP4	0.00111941	1	142	GroupHCHWA_D	0.628509	5949	9
1.47276	1.84761	1.00629e-05	MGC16142	0.00112331	1	143	GroupHCHWA_D	0.440744	1291	3
5.69708	1.03399	1.0104e-05	RHOQ	0.00112331	1	144	GroupHCHWA_D	0.400925	4542	2
2.89979	-0.995316	1.01597e-05	DHX58	0.00112331	-1	145	GroupHCHWA_D	0.582409	2615	8
5.89269	-0.597209	1.03841e-05	POMGNT1	0.00114026	-1	146	GroupHCHWA_D	0.572967	3529	7
4.44333	1.08576	1.07592e-05	ZNF326	0.00117342	1	147	GroupHCHWA_D	0.365399	3919	1
5.42545	0.677651	1.0875e-05	RBM12B	0.00117803	1	148	GroupHCHWA_D	0.407407	5103	2
4.96131	-0.947039	1.11005e-05	CCDC113	0.00119439	-1	149	GroupHCHWA_D	0.483669	5266	5
3.87922	1.05843	1.11817e-05	UGDH	0.0011951	1	150	GroupHCHWA_D	0.406133	3196	2
3.07727	-0.967577	1.12883e-05	SLC37A4	0.00119565	-1	151	GroupHCHWA_D	0.588617	2776	8
5.24298	-0.581128	1.1336e-05	TRIM3	0.00119565	-1	152	GroupHCHWA_D	0.617509	3404	9
6.1199	-0.712684	1.14525e-05	HLTF	0.00120004	-1	153	GroupHCHWA_D	0.367221	5351	1
3.85144	1.17468	1.18677e-05	CDK11A	0.00123547	1	154	GroupHCHWA_D	0.559954	2627	7
7.87151	-0.688591	1.19541e-05	CD99L2	0.00123644	-1	155	GroupHCHWA_D	0.566088	3745	7
9.70674	-0.616026	1.25773e-05	CALM2	0.00129255	-1	156	GroupHCHWA_D	0.377755	4855	1
9.30732	-0.632217	1.27349e-05	HERC1	0.00130042	-1	157	GroupHCHWA_D	0.470751	15197	4
6.78058	0.848317	1.36731e-05	CMIP	0.00138502	1	158	GroupHCHWA_D	0.550844	4504	7
6.86011	0.866323	1.37361e-05	PAPOLA	0.00138502	1	159	GroupHCHWA_D	0.365745	8320	1
3.67067	1.5895	1.38528e-05	ANKRD37	0.00138805	1	160	GroupHCHWA_D	0.506424	934	5
6.05291	-0.686387	1.41274e-05	RNF14	0.00140677	-1	161	GroupHCHWA_D	0.42317	4523	3
5.16957	1.33145	1.4471e-05	P4HA1	0.0014321	1	162	GroupHCHWA_D	0.412292	3010	2
4.89269	-0.592783	1.49582e-05	QARS	0.00147123	-1	163	GroupHCHWA_D	0.551932	2821	7
6.84397	0.87349	1.51328e-05	COL6A1	0.00147932	1	164	GroupHCHWA_D	0.635266	4225	9
2.90424	1.4024	1.52416e-05	C3orf62	0.00148093	1	165	GroupHCHWA_D	0.476602	3590	5
3.31643	1.26149	1.5422e-05	SPRY1	0.0014812	1	166	GroupHCHWA_D	0.469582	3041	4
4.14709	2.62465	1.54292e-05	LOXHD1	0.0014812	1	167	GroupHCHWA_D	0.540857	7869	7
8.3856	0.811082	1.59593e-05	SRRM2	0.00152297	1	168	GroupHCHWA_D	0.562279	9353	7
7.50488	0.559481	1.6169e-05	EPN1	0.00153386	1	169	GroupHCHWA_D	0.635611	3263	9
4.31074	1.28237	1.637e-05	PIANP	0.0015357	1	170	GroupHCHWA_D	0.628995	3035	9
4.83606	-0.684905	1.638e-05	WDR35	0.0015357	-1	171	GroupHCHWA_D	0.393032	6946	1
3.40059	1.41912	1.66352e-05	THUMPD3-AS1	0.00155055	1	172	GroupHCHWA_D	0.369892	1860	1
5.98401	0.749082	1.70493e-05	TOP1	0.00156759	1	173	GroupHCHWA_D	0.421377	3733	2
7.80897	-0.710417	1.7149e-05	TRIM37	0.00156759	-1	174	GroupHCHWA_D	0.438633	4799	3
8.24443	0.798054	1.71759e-05	NCOR2	0.00156759	1	175	GroupHCHWA_D	0.653305	8881	9
2.28667	1.91063	1.72091e-05	MSH4	0.00156759	1	176	GroupHCHWA_D	0.371681	3277	1
5.74071	-0.682514	1.79305e-05	TRAPPC11	0.00161219	-1	177	GroupHCHWA_D	0.419851	4554	2
5.80165	1.20113	1.80123e-05	SOX9	0.00161219	1	178	GroupHCHWA_D	0.510422	3934	6
2.08534	2.63679	1.80598e-05	C7orf61	0.00161219	1	179	GroupHCHWA_D	0.553785	1004	7
5.36559	-0.585009	1.8101e-05	GMPR2	0.00161219	-1	180	GroupHCHWA_D	0.508818	2665	6
6.99837	-0.695039	1.87066e-05	C1orf216	0.00165693	-1	181	GroupHCHWA_D	0.55317	2934	7
2.59465	1.18353	1.88708e-05	ASPRV1	0.00166229	1	182	GroupHCHWA_D	0.555402	2175	7
5.451	0.837387	1.93125e-05	MNT	0.00169191	1	183	GroupHCHWA_D	0.611937	4842	8
7.14271	1.15485	2.03549e-05	DNAJA4	0.0017649	1	184	GroupHCHWA_D	0.493179	3372	5
1.58122	1.68358	2.03659e-05	ZNF69	0.0017649	1	185	GroupHCHWA_D	0.441832	1659	3
7.54317	-1.04912	2.11453e-05	AHNAK2	0.00182259	-1	186	GroupHCHWA_D	0.585085	18317	8
4.93194	-0.657223	2.1297e-05	RNF31	0.00182585	-1	187	GroupHCHWA_D	0.61108	3556	8
3.47046	-1.24045	2.16344e-05	PYCRL	0.00184491	-1	188	GroupHCHWA_D	0.631815	5356	9
5.11207	0.795701	2.18548e-05	RPL28	0.00185384	1	189	GroupHCHWA_D	0.554312	5183	7
6.9489	-0.731578	2.22424e-05	FAM131A	0.00186936	-1	190	GroupHCHWA_D	0.597504	2805	8
8.37517	-0.858904	2.22709e-05	NELL2	0.00186936	-1	191	GroupHCHWA_D	0.474965	4234	4
6.44023	-0.601225	2.25654e-05	NDUFA13	0.00187952	-1	192	GroupHCHWA_D	0.619926	542	9
7.5491	-1.00504	2.26264e-05	TUBB3	0.00187952	-1	193	GroupHCHWA_D	0.620638	2006	9
5.55148	1.00042	2.28085e-05	BCL6	0.00188231	1	194	GroupHCHWA_D	0.499371	3975	5
4.13385	-0.836203	2.28949e-05	JMJD4	0.00188231	-1	195	GroupHCHWA_D	0.621965	2595	9
5.68003	0.855886	2.3327e-05	SPRY2	0.00190363	1	196	GroupHCHWA_D	0.452607	2110	4
7.89391	0.823694	2.33916e-05	PIP5K1C	0.00190363	1	197	GroupHCHWA_D	0.640144	6108	9
4.32291	0.983324	2.40274e-05	HRH2	0.00194084	1	198	GroupHCHWA_D	0.52248	4048	6
3.39831	0.849198	2.40911e-05	ADPRHL1	0.00194084	1	199	GroupHCHWA_D	0.555096	2178	7
4.63605	0.893971	2.43239e-05	ZDHHC18	0.00194981	1	200	GroupHCHWA_D	0.59605	3139	8
4.00945	1.10388	2.45131e-05	ZNRF2P1	0.00195519	1	201	GroupHCHWA_D	0.610128	2034	8
5.09439	0.792629	2.51777e-05	NPAS2	0.00198567	1	202	GroupHCHWA_D	0.531469	4004	6
1.90645	-1.17296	2.52014e-05	SLC25A5-AS1	0.00198567	-1	203	GroupHCHWA_D	0.496438	3088	5
4.26356	2.11349	2.52668e-05	VIM-AS1	0.00198567	1	204	GroupHCHWA_D	0.471888	1992	4
7.06622	-0.645441	2.67591e-05	ATG2B	0.00208033	-1	205	GroupHCHWA_D	0.424182	11099	3
3.58101	0.969486	2.67682e-05	GSG1L	0.00208033	1	206	GroupHCHWA_D	0.522709	5020	6
7.57032	1.73116	2.68606e-05	SNORD3A	0.00208033	1	207	GroupHCHWA_D	0.497696	217	5
7.04056	1.13442	2.72922e-05	NUDC	0.00209404	1	208	GroupHCHWA_D	0.558191	1813	7
3.95709	1.33788	2.72988e-05	LINC00632	0.00209404	1	209	GroupHCHWA_D	0.436364	2750	3
7.03123	0.830239	2.75378e-05	HNRNPH1	0.00210231	1	210	GroupHCHWA_D	0.434934	2290	3
7.13306	-0.661174	2.78271e-05	NALCN	0.00211319	-1	211	GroupHCHWA_D	0.440272	6923	3
5.13522	0.817017	2.79438e-05	TMOD3	0.00211319	1	212	GroupHCHWA_D	0.383626	4666	1
3.63163	0.809366	2.83543e-05	NXN	0.00212871	1	213	GroupHCHWA_D	0.598206	3121	8
5.46757	-0.657271	2.84146e-05	MAN1B1	0.00212871	-1	214	GroupHCHWA_D	0.589655	2900	8
5.32431	-0.725665	2.86841e-05	DOPEY2	0.0021389	-1	215	GroupHCHWA_D	0.510223	7679	6
5.29097	-0.648483	3.03554e-05	VPS52	0.00224574	-1	216	GroupHCHWA_D	0.519056	21830	6
2.28388	1.53917	3.04211e-05	PPP1R26-AS1	0.00224574	1	217	GroupHCHWA_D	0.476597	2927	5
4.33107	1.14185	3.05955e-05	TRIM52	0.00224574	1	218	GroupHCHWA_D	0.482944	2228	5
7.79656	-0.697006	3.06772e-05	PLEKHB2	0.00224574	-1	219	GroupHCHWA_D	0.472272	4472	4
4.78311	1.54239	3.11659e-05	ANP32B	0.00226069	1	220	GroupHCHWA_D	0.483292	1616	5
1.89342	1.62708	3.12972e-05	CFI	0.00226069	1	221	GroupHCHWA_D	0.405831	2161	2
5.41461	0.926626	3.13044e-05	SMC5	0.00226069	1	222	GroupHCHWA_D	0.365801	5965	1
4.45121	2.04076	3.15917e-05	LOC101928841	0.0022712	1	223	GroupHCHWA_D	0.609463	9405	8
3.41059	1.15812	3.26436e-05	TGFB1	0.00233635	1	224	GroupHCHWA_D	0.646922	2583	9
7.37481	-0.611885	3.29e-05	KIFAP3	0.00233964	-1	225	GroupHCHWA_D	0.399519	4573	2
7.09035	0.687665	3.29815e-05	DUSP8	0.00233964	1	226	GroupHCHWA_D	0.646397	13419	9
4.74047	1.0801	3.32624e-05	STX2	0.00234918	1	227	GroupHCHWA_D	0.434758	3464	3
4.13493	0.955842	3.39243e-05	EXOG	0.00237948	1	228	GroupHCHWA_D	0.455817	3146	4
5.38304	-0.578245	3.39883e-05	TSR1	0.00237948	-1	229	GroupHCHWA_D	0.503484	4880	5
4.4838	2.32251	3.4242e-05	HILPDA	0.00238352	1	230	GroupHCHWA_D	0.519122	1412	6
8.89654	-0.974828	3.43434e-05	TUBA1B	0.00238352	-1	231	GroupHCHWA_D	0.545974	1751	7
2.52576	1.42138	3.54371e-05	LOC100289230	0.00244883	1	232	GroupHCHWA_D	0.461087	1876	4
5.14314	1.12308	3.57832e-05	ZBED6	0.00245526	1	233	GroupHCHWA_D	0.421088	2940	2
4.86876	2.00596	3.58365e-05	RDH10	0.00245526	1	234	GroupHCHWA_D	0.481201	3963	5
5.29188	0.888709	3.60464e-05	ZFHX3	0.00245913	1	235	GroupHCHWA_D	0.512989	16168	6
4.51142	0.726369	3.65804e-05	PXN	0.00246662	1	236	GroupHCHWA_D	0.587287	4216	8
3.10418	1.11777	3.65924e-05	CSRP2	0.00246662	1	237	GroupHCHWA_D	0.486457	923	5
2.80417	2.60825	3.67671e-05	HSPA7	0.00246662	1	238	GroupHCHWA_D	0.590052	2493	8
3.71739	1.36791	3.68545e-05	NFKB2	0.00246662	1	239	GroupHCHWA_D	0.628314	3885	9
5.05674	0.833975	3.69255e-05	PML	0.00246662	1	240	GroupHCHWA_D	0.583463	7704	8
1.75767	1.40589	3.72125e-05	VAMP5	0.00247526	1	241	GroupHCHWA_D	0.603008	665	8
5.50364	0.836253	3.73636e-05	NOVA2	0.00247526	1	242	GroupHCHWA_D	0.66862	1877	9
2.82298	1.16596	3.76571e-05	TPRKB	0.00248444	1	243	GroupHCHWA_D	0.361702	752	1
8.12003	-0.706816	3.80548e-05	NUAK1	0.00250039	-1	244	GroupHCHWA_D	0.542442	6821	7
2.24132	1.99582	3.84132e-05	CEP295NL	0.00251364	1	245	GroupHCHWA_D	0.565298	2167	7
4.29612	-0.898741	3.86072e-05	GSS	0.00251606	-1	246	GroupHCHWA_D	0.558947	1900	7
5.53404	-0.731135	3.95527e-05	CA10	0.00256724	-1	247	GroupHCHWA_D	0.513059	3867	6
2.22932	2.38417	3.97145e-05	STC1	0.00256735	1	248	GroupHCHWA_D	0.436936	3877	3
4.57234	-1.11623	4.05478e-05	SOWAHB	0.00260239	-1	249	GroupHCHWA_D	0.59329	2921	8
3.72362	-1.05149	4.05812e-05	C2orf82	0.00260239	-1	250	GroupHCHWA_D	0.729032	465	9
6.61895	1.43429	4.16657e-05	CEBPD	0.00266129	1	251	GroupHCHWA_D	0.659472	1251	9
3.5218	1.28047	4.2061e-05	LOC389765	0.00266657	1	252	GroupHCHWA_D	0.409297	1764	2
5.60372	0.594836	4.2081e-05	FAM193A	0.00266657	1	253	GroupHCHWA_D	0.530734	5206	6
3.16509	1.43666	4.28066e-05	ZRSR2	0.00270187	1	254	GroupHCHWA_D	0.49636	1511	5
4.47262	1.16171	4.335e-05	TRAF2	0.00272544	1	255	GroupHCHWA_D	0.612209	2277	8
6.99973	0.927831	4.36714e-05	CTXN1	0.00273492	1	256	GroupHCHWA_D	0.730008	1263	9
7.26873	-1.11397	4.45533e-05	CIRBP	0.0027793	-1	257	GroupHCHWA_D	0.574021	3472	7
8.00376	0.608449	4.50625e-05	MICAL3	0.00280002	1	258	GroupHCHWA_D	0.551645	14774	7
3.81018	1.25115	4.52349e-05	UPF3B	0.00280002	1	259	GroupHCHWA_D	0.420133	2404	2
5.4821	0.660851	4.58914e-05	PPARD	0.00282973	1	260	GroupHCHWA_D	0.578924	4460	8
4.93381	-0.601634	4.63372e-05	TRUB2	0.00283404	-1	261	GroupHCHWA_D	0.546213	1439	7
4.77833	1.0904	4.64591e-05	SMAD1	0.00283404	1	262	GroupHCHWA_D	0.4376	3117	3
3.2972	1.35783	4.64915e-05	ARL6IP6	0.00283404	1	263	GroupHCHWA_D	0.445506	2826	3
5.89782	-0.645429	4.77012e-05	NUP133	0.00287527	-1	264	GroupHCHWA_D	0.433333	4170	3
5.63164	0.66959	4.77108e-05	ZFYVE21	0.00287527	1	265	GroupHCHWA_D	0.537492	1507	6
2.31231	0.997144	4.7753e-05	SLX4IP	0.00287527	1	266	GroupHCHWA_D	0.457711	1407	4
4.51412	-0.685385	4.78853e-05	HPS6	0.00287527	-1	267	GroupHCHWA_D	0.642216	2672	9
5.95319	0.918894	4.81855e-05	FGFRL1	0.00287711	1	268	GroupHCHWA_D	0.632994	3237	9
1.66857	1.34615	4.8377e-05	NBR2	0.00287711	1	269	GroupHCHWA_D	0.522694	1366	6
2.91025	1.27685	4.84544e-05	PRSS53	0.00287711	1	270	GroupHCHWA_D	0.631164	2028	9
4.06251	0.823723	4.89775e-05	LIME1	0.00289744	1	271	GroupHCHWA_D	0.676391	1851	9
5.3854	-0.815111	4.98338e-05	PCCB	0.00291854	-1	272	GroupHCHWA_D	0.512793	1876	6
7.38061	0.690493	4.9979e-05	CREBBP	0.00291854	1	273	GroupHCHWA_D	0.542271	10196	7
4.11426	-0.815928	5.01152e-05	C6orf47	0.00291854	-1	274	GroupHCHWA_D	0.569689	17327	7
8.07153	1.36541	5.03769e-05	JUN	0.00291854	1	275	GroupHCHWA_D	0.559735	3323	7
2.97615	-0.953403	5.03853e-05	B9D1	0.00291854	-1	276	GroupHCHWA_D	0.59662	1775	8
1.72562	-1.3251	5.04263e-05	HSD17B8	0.00291854	-1	277	GroupHCHWA_D	0.58995	5970	8
4.41245	1.97139	5.07799e-05	FNDC9	0.00292843	1	278	GroupHCHWA_D	0.471778	2126	4
6.71463	-0.612015	5.09654e-05	TTC37	0.00292859	-1	279	GroupHCHWA_D	0.394109	5704	1
4.26012	-0.664917	5.13111e-05	PSEN2	0.00293792	-1	280	GroupHCHWA_D	0.555701	2298	7
6.14785	-0.70713	5.23226e-05	PELI3	0.00297708	-1	281	GroupHCHWA_D	0.631156	2863	9
4.79049	0.850105	5.23662e-05	FYCO1	0.00297708	1	282	GroupHCHWA_D	0.532989	8518	6
5.63745	-0.705321	5.36148e-05	TK2	0.00302805	-1	283	GroupHCHWA_D	0.524849	6137	6
2.05642	1.54455	5.36407e-05	C15orf62	0.00302805	1	284	GroupHCHWA_D	0.586179	2489	8
3.95364	0.837033	5.43526e-05	RBM48	0.00305748	1	285	GroupHCHWA_D	0.413512	1717	2
5.77937	0.696787	5.60897e-05	AEBP2	0.00314416	1	286	GroupHCHWA_D	0.381092	5807	1
3.66457	2.46442	5.63909e-05	IGSF22	0.00315003	1	287	GroupHCHWA_D	0.553761	4334	7
1.50669	2.10374	5.69004e-05	SNX31	0.00316057	1	288	GroupHCHWA_D	0.430143	2455	3
5.64078	0.82929	5.69738e-05	MSL2	0.00316057	1	289	GroupHCHWA_D	0.427044	4770	3
4.12779	1.33544	5.73026e-05	FAM101B	0.00316079	1	290	GroupHCHWA_D	0.510221	3620	6
3.87109	0.754603	5.74376e-05	ABHD17C	0.00316079	1	291	GroupHCHWA_D	0.497881	2360	5
1.86647	1.14028	5.75693e-05	DND1	0.00316079	1	292	GroupHCHWA_D	0.61884	1603	9
2.18809	1.76268	5.82968e-05	LOC646903	0.00318981	1	293	GroupHCHWA_D	0.415988	1964	2
4.20643	0.91671	5.87447e-05	PHACTR4	0.00320194	1	294	GroupHCHWA_D	0.466574	6492	4
3.19338	1.25663	5.89179e-05	PBDC1	0.00320194	1	295	GroupHCHWA_D	0.445967	1314	3
6.6144	0.900089	5.91291e-05	AJAP1	0.00320256	1	296	GroupHCHWA_D	0.547784	3317	7
6.98318	-0.577539	6.0664e-05	CHD8	0.00326968	-1	297	GroupHCHWA_D	0.495407	8383	5
6.98992	-0.713574	6.07762e-05	DLG3	0.00326968	-1	298	GroupHCHWA_D	0.538189	6782	6
5.85415	0.694497	6.16856e-05	ELAVL1	0.0033075	1	299	GroupHCHWA_D	0.463354	6058	4
7.47831	1.45782	6.24221e-05	IGFBP7	0.00333584	1	300	GroupHCHWA_D	0.534548	1317	6
3.42638	1.7971	6.26401e-05	GSDMB	0.00333637	1	301	GroupHCHWA_D	0.477612	1809	5
2.62105	1.38237	6.33326e-05	SLC25A25-AS1	0.00335923	1	302	GroupHCHWA_D	0.552056	3842	7
4.05586	1.39667	6.41375e-05	BST2	0.00335923	1	303	GroupHCHWA_D	0.573111	1019	7
4.67061	-0.546365	6.41845e-05	PDIK1L	0.00335923	-1	304	GroupHCHWA_D	0.395652	4600	2
6.67604	0.87779	6.4185e-05	SERP1	0.00335923	1	305	GroupHCHWA_D	0.40826	3172	2
4.90497	0.658831	6.42046e-05	CDK11B	0.00335923	1	306	GroupHCHWA_D	0.566246	3170	7
4.47637	0.779077	6.46194e-05	GFPT2	0.00335923	1	307	GroupHCHWA_D	0.515443	3011	6
3.76729	1.04355	6.47095e-05	MAP2K3	0.00335923	1	308	GroupHCHWA_D	0.592249	2374	8
6.3776	-0.976664	6.47456e-05	PDE1A	0.00335923	-1	309	GroupHCHWA_D	0.381926	6263	1
4.25471	1.08365	6.49735e-05	TAF3	0.00336018	1	310	GroupHCHWA_D	0.520619	3298	6
4.15626	0.93369	6.52761e-05	CCHE1	0.00336497	1	311	GroupHCHWA_D	0.419265	2502	2
3.78123	1.47191	6.56791e-05	HLA-L	0.0033749	1	312	GroupHCHWA_D	0.480149	27731	5
4.2045	0.998859	6.60402e-05	NSRP1	0.00337563	1	313	GroupHCHWA_D	0.403976	2515	2
4.72704	-0.564341	6.61146e-05	FOXRED1	0.00337563	-1	314	GroupHCHWA_D	0.573576	2195	7
6.34024	1.14692	6.69558e-05	STAC2	0.00340773	1	315	GroupHCHWA_D	0.60177	3277	8
3.25439	1.05822	6.82258e-05	PLAGL2	0.00346138	1	316	GroupHCHWA_D	0.511669	5656	6
4.51036	0.904934	6.99085e-05	BANP	0.00353556	1	317	GroupHCHWA_D	0.580119	2696	8
5.57191	1.59947	7.01489e-05	METRNL	0.00353657	1	318	GroupHCHWA_D	0.639777	3223	9
5.21645	0.949586	7.07177e-05	CCDC9	0.00355179	1	319	GroupHCHWA_D	0.649182	2078	9
6.18791	0.924605	7.10048e-05	TARDBP	0.00355179	1	320	GroupHCHWA_D	0.407873	4217	2
7.19519	-0.60456	7.11155e-05	MTOR	0.00355179	-1	321	GroupHCHWA_D	0.522636	8725	6
5.7642	-0.584837	7.1929e-05	ATG2A	0.00358126	-1	322	GroupHCHWA_D	0.640201	6373	9
4.43369	1.25229	7.24514e-05	NFIL3	0.0035961	1	323	GroupHCHWA_D	0.50102	2451	5
5.83671	-0.539683	7.39695e-05	KATNB1	0.00366012	-1	324	GroupHCHWA_D	0.615646	2646	8
2.09655	1.66081	7.59846e-05	CFAP53	0.0037437	1	325	GroupHCHWA_D	0.450905	1823	4
6.94087	0.897724	7.61257e-05	MSL1	0.0037437	1	326	GroupHCHWA_D	0.44331	3819	3
4.79955	-0.648581	7.69202e-05	PARN	0.00376055	-1	327	GroupHCHWA_D	0.455401	6166	4
4.18296	2.81587	7.69373e-05	SERPINE1	0.00376055	1	328	GroupHCHWA_D	0.515674	3190	6
4.20674	-0.79739	7.82401e-05	PRKAG1	0.00377396	-1	329	GroupHCHWA_D	0.502546	1964	5
6.42565	-0.636818	7.82729e-05	PUF60	0.00377396	-1	330	GroupHCHWA_D	0.616368	3910	9
4.23884	1.21076	7.85016e-05	ETV3	0.00377396	1	331	GroupHCHWA_D	0.493174	2930	5
4.43854	-0.979316	7.85917e-05	ZBTB22	0.00377396	-1	332	GroupHCHWA_D	0.600513	13645	8
5.17789	-0.775311	7.86215e-05	FIBP	0.00377396	-1	333	GroupHCHWA_D	0.586897	1450	8
2.88788	1.64099	7.86242e-05	RPS16P5	0.00377396	1	334	GroupHCHWA_D	0.467068	3158	4
6.65439	0.62801	7.93119e-05	AFF3	0.00379561	1	335	GroupHCHWA_D	0.485022	8212	5
3.08397	0.952869	8.00371e-05	MSI1	0.00381891	1	336	GroupHCHWA_D	0.592269	2975	8
6.59739	0.995588	8.14936e-05	LINC-PINT	0.00386126	1	337	GroupHCHWA_D	0.454809	6207	4
6.11711	1.22836	8.15137e-05	XBP1	0.00386126	1	338	GroupHCHWA_D	0.496703	1820	5
5.32431	0.640865	8.16472e-05	WIZ	0.00386126	1	339	GroupHCHWA_D	0.629559	4168	9
6.79285	1.29652	8.20049e-05	TET3	0.00386677	1	340	GroupHCHWA_D	0.523228	11387	6
2.30884	1.17737	8.42279e-05	C20orf96	0.00395951	1	341	GroupHCHWA_D	0.522388	1608	6
5.67675	0.723865	8.44656e-05	ZCCHC2	0.00395951	1	342	GroupHCHWA_D	0.481826	7841	5
3.97611	0.87127	8.52511e-05	NAF1	0.00396681	1	343	GroupHCHWA_D	0.447903	2313	3
4.30076	-0.873095	8.53215e-05	NDUFB1	0.00396681	-1	344	GroupHCHWA_D	0.484487	419	5
3.66034	-0.927795	8.54081e-05	TRAPPC2L	0.00396681	-1	345	GroupHCHWA_D	0.580286	629	8
2.74407	-1.03851	8.57545e-05	NEU4	0.00396681	-1	346	GroupHCHWA_D	0.679651	5494	9
3.40546	1.40478	8.58649e-05	MC1R	0.00396681	1	347	GroupHCHWA_D	0.630526	3099	9
1.97055	1.40198	8.61058e-05	AOC2	0.00396681	1	348	GroupHCHWA_D	0.548145	2669	7
4.2406	-0.69494	8.67563e-05	RAD17	0.00396841	-1	349	GroupHCHWA_D	0.407245	7730	2
0.989959	1.83125	8.70547e-05	LOC401127	0.00396841	1	350	GroupHCHWA_D	0.476046	1649	5
3.59496	-0.73716	8.73066e-05	RDH13	0.00396841	-1	351	GroupHCHWA_D	0.614022	27670	8
4.49667	0.728057	8.73675e-05	FAM43A	0.00396841	1	352	GroupHCHWA_D	0.62035	3145	9
4.83899	0.886287	8.74706e-05	OAF	0.00396841	1	353	GroupHCHWA_D	0.640172	1862	9
6.95484	-0.617135	8.76258e-05	NAPG	0.00396841	-1	354	GroupHCHWA_D	0.388964	3715	1
3.42948	1.15755	8.80483e-05	SPACA6P	0.00397631	1	355	GroupHCHWA_D	0.584012	1964	8
5.92421	0.950273	8.89186e-05	HEXIM1	0.00400433	1	356	GroupHCHWA_D	0.499687	4785	5
7.01282	-0.765243	8.9757e-05	DDHD2	0.00402174	-1	357	GroupHCHWA_D	0.420124	5784	2
4.00654	1.09678	8.98102e-05	RP9P	0.00402174	1	358	GroupHCHWA_D	0.535852	1297	6
5.06289	1.36305	9.00576e-05	RNF217	0.00402174	1	359	GroupHCHWA_D	0.405061	5493	2
2.84262	-1.02679	9.27331e-05	TST	0.00412971	-1	360	GroupHCHWA_D	0.612597	1159	8
2.52626	1.2248	9.33723e-05	VN1R1	0.00414312	1	361	GroupHCHWA_D	0.402937	1566	2
7.28433	0.666972	9.3551e-05	CACNA1C	0.00414312	1	362	GroupHCHWA_D	0.526149	14169	6
4.99115	1.21184	9.40979e-05	CD99	0.00415586	1	363	GroupHCHWA_D	0.556175	2510	7
5.86277	1.07219	9.4919e-05	RILPL1	0.00418061	1	364	GroupHCHWA_D	0.574314	2624	7
3.42368	1.67701	9.54068e-05	SLC7A5P1	0.00419058	1	365	GroupHCHWA_D	0.702439	615	9
4.33489	-1.63873	9.56923e-05	DNAH17	0.00419164	-1	366	GroupHCHWA_D	0.554689	13723	7
4.94031	-0.642328	9.62902e-05	CDK5	0.0042037	-1	367	GroupHCHWA_D	0.575021	1193	7
4.4543	0.862002	9.67125e-05	PSMA3-AS1	0.0042037	1	368	GroupHCHWA_D	0.378834	2608	1
7.46251	0.830731	9.67543e-05	CLIP3	0.0042037	1	369	GroupHCHWA_D	0.586273	3628	8
4.78244	0.949325	9.72096e-05	ZNF385A	0.00421206	1	370	GroupHCHWA_D	0.631124	2776	9
2.77994	1.41128	9.76484e-05	FAM65C	0.00421967	1	371	GroupHCHWA_D	0.590816	4900	8
7.17682	-0.522393	9.81208e-05	PCDH1	0.00422869	-1	372	GroupHCHWA_D	0.598753	5615	8
4.4802	-0.728663	9.94547e-05	VPS33B	0.0042642	-1	373	GroupHCHWA_D	0.518851	2785	6
5.41545	-0.809301	9.94768e-05	VPS11	0.0042642	-1	374	GroupHCHWA_D	0.534602	3468	6
3.79421	1.00404	0.000100716	LINC00889	0.00430582	1	375	GroupHCHWA_D	0.399587	2908	2
5.87791	-0.615071	0.000101187	IMMT	0.00431444	-1	376	GroupHCHWA_D	0.488171	3001	5
7.20161	-0.800681	0.000101582	ENDOD1	0.00431978	-1	377	GroupHCHWA_D	0.45472	4693	4
5.16206	-0.846368	0.000102026	PLCH1	0.00432721	-1	378	GroupHCHWA_D	0.438188	6536	3
7.43951	0.75666	0.000102351	ENAH	0.00432952	1	379	GroupHCHWA_D	0.407379	13172	2
1.91953	1.94414	0.000103137	METTL7B	0.00435131	1	380	GroupHCHWA_D	0.548837	1505	7
6.30336	0.731544	0.0001036	RPLP1	0.00435938	1	381	GroupHCHWA_D	0.558594	512	7
5.78612	0.60956	0.000106272	CDC73	0.00444917	1	382	GroupHCHWA_D	0.348375	5939	1
5.8987	-0.611514	0.00010629	VARS	0.00444917	-1	383	GroupHCHWA_D	0.625301	26616	9
1.39046	-1.09263	0.000106791	KLHL14	0.00445853	-1	384	GroupHCHWA_D	0.454823	4261	4
4.1085	1.32481	0.00010822	CEBPB-AS1	0.00450644	1	385	GroupHCHWA_D	0.538513	2973	6
5.77525	0.644845	0.000109475	VGLL4	0.00454689	1	386	GroupHCHWA_D	0.521731	5108	6
7.69215	-0.690131	0.00011044	CLCN4	0.00457511	-1	387	GroupHCHWA_D	0.477166	6788	5
5.02372	-0.630371	0.000111628	ZNF629	0.00457967	-1	388	GroupHCHWA_D	0.572532	6087	7
5.09238	0.980406	0.000111801	CLK4	0.00457967	1	389	GroupHCHWA_D	0.373753	2507	1
8.58536	1.03121	0.000112723	NRGN	0.00457967	1	390	GroupHCHWA_D	0.643678	1218	9
5.3618	0.970785	0.000112911	C1QL1	0.00457967	1	391	GroupHCHWA_D	0.713333	1500	9
5.26254	1.22274	0.00011314	TGFB2	0.00457967	1	392	GroupHCHWA_D	0.424253	5954	3
4.74872	-0.683678	0.000113202	EPHB2	0.00457967	-1	393	GroupHCHWA_D	0.560105	11039	7
4.98038	0.750544	0.000113203	SETD1A	0.00457967	1	394	GroupHCHWA_D	0.623663	6449	9
7.63374	-0.600132	0.000113339	LRPPRC	0.00457967	-1	395	GroupHCHWA_D	0.415924	6619	2
5.81539	-0.696938	0.000113364	ATR	0.00457967	-1	396	GroupHCHWA_D	0.400194	8251	2
6.70321	-0.549395	0.000113406	RAP1GDS1	0.00457967	-1	397	GroupHCHWA_D	0.413986	3761	2
2.15358	-1.3354	0.000113764	MDH1B	0.00458258	-1	398	GroupHCHWA_D	0.420346	2831	2
9.37236	-0.815796	0.000114616	SV2B	0.00460206	-1	399	GroupHCHWA_D	0.451538	11700	4
6.50369	-0.45378	0.000114822	COX5B	0.00460206	-1	400	GroupHCHWA_D	0.566337	505	7
4.09985	1.98294	0.000115737	KCNE4	0.00462719	1	401	GroupHCHWA_D	0.496378	3175	5
3.8261	0.806426	0.000116997	FKBP14	0.00466592	1	402	GroupHCHWA_D	0.391069	5173	1
5.70023	-0.859992	0.000117806	AGL	0.0046865	-1	403	GroupHCHWA_D	0.380066	8217	1
5.52068	-0.682903	0.000120796	PDHB	0.00478266	-1	404	GroupHCHWA_D	0.458385	1610	4
3.76008	1.1058	0.000120819	NR2F2	0.00478266	1	405	GroupHCHWA_D	0.507038	6110	6
7.83002	0.502387	0.000121498	ANKRD12	0.00479767	1	406	GroupHCHWA_D	0.360664	11623	1
4.41654	0.627379	0.000123494	ZNF865	0.00484777	1	407	GroupHCHWA_D	0.659325	4949	9
3.42451	1.03909	0.00012363	PLEKHA7	0.00484777	1	408	GroupHCHWA_D	0.558444	4808	7
5.03851	-0.58883	0.000123674	RANBP1	0.00484777	-1	409	GroupHCHWA_D	0.549975	1991	7
3.78196	-1.07814	0.000124024	HIST1H2AE	0.00484966	-1	410	GroupHCHWA_D	0.542553	564	7
7.75676	0.623534	0.000125024	SPEN	0.00487111	1	411	GroupHCHWA_D	0.516643	12227	6
5.03696	-0.56129	0.000125181	RAB35	0.00487111	-1	412	GroupHCHWA_D	0.576231	2945	7
6.33957	0.932738	0.000126992	CALD1	0.00492107	1	413	GroupHCHWA_D	0.428805	5506	3
6.5906	-0.697359	0.000127222	FAM49B	0.00492107	-1	414	GroupHCHWA_D	0.43924	4526	3
5.72824	0.553849	0.000127385	ELK4	0.00492107	1	415	GroupHCHWA_D	0.392504	11847	1
3.99534	0.784367	0.000128556	ZNF273	0.00495436	1	416	GroupHCHWA_D	0.345265	4414	1
2.95495	1.10269	0.000128941	CCDC62	0.00495729	1	417	GroupHCHWA_D	0.416978	3216	2
8.08952	-0.619135	0.000129409	NUDCD3	0.00496338	-1	418	GroupHCHWA_D	0.548709	4917	7
6.32914	0.615219	0.000129728	PRPF4B	0.00496373	1	419	GroupHCHWA_D	0.368752	7482	1
9.39561	0.960428	0.000130207	MYH9	0.00497018	1	420	GroupHCHWA_D	0.585915	7554	8
3.28175	0.9954	0.000132006	ZNF202	0.00502691	1	421	GroupHCHWA_D	0.49228	4469	5
5.27219	0.684051	0.000133052	VPS37A	0.00505472	1	422	GroupHCHWA_D	0.372083	4585	1
3.57868	0.871922	0.000134476	ZNF431	0.00509674	1	423	GroupHCHWA_D	0.371035	3846	1
6.06405	-0.608073	0.00013581	VDAC3	0.00513515	-1	424	GroupHCHWA_D	0.463636	1540	4
1.76094	-1.4869	0.000138128	C20orf166-AS1	0.0052105	-1	425	GroupHCHWA_D	0.597784	3610	8
8.27772	-0.861509	0.000138744	STMN1	0.00522146	-1	426	GroupHCHWA_D	0.50111	3602	5
6.79654	-0.561181	0.000139447	COPG1	0.00522584	-1	427	GroupHCHWA_D	0.526025	3074	6
3.99357	0.928064	0.000139559	TAF4	0.00522584	1	428	GroupHCHWA_D	0.53289	7373	6
4.51472	0.668149	0.000139838	KDM1B	0.00522584	1	429	GroupHCHWA_D	0.422194	3875	3
2.71758	0.892189	0.000141224	CA5BP1	0.00525871	1	430	GroupHCHWA_D	0.586519	994	8
5.71612	-0.760693	0.000142083	STOML1	0.00525871	-1	431	GroupHCHWA_D	0.622103	2244	9
4.14092	0.92793	0.000142184	CTNNAL1	0.00525871	1	432	GroupHCHWA_D	0.423285	2594	3
5.11038	-0.617489	0.00014222	SRP54	0.00525871	-1	433	GroupHCHWA_D	0.408154	2281	2
2.86357	1.4492	0.000142358	DYRK3	0.00525871	1	434	GroupHCHWA_D	0.473242	2261	4
3.62831	-1.07262	0.000144098	SEMA3G	0.00531077	-1	435	GroupHCHWA_D	0.590213	4700	8
3.00877	1.6246	0.0001445	CCDC154	0.00531335	1	436	GroupHCHWA_D	0.656321	2191	9
8.63065	0.622707	0.000146715	JUND	0.00537555	1	437	GroupHCHWA_D	0.69893	1963	9
7.98715	-0.661532	0.000146862	PYGB	0.00537555	-1	438	GroupHCHWA_D	0.584846	4131	8
4.05861	-0.714045	0.000148242	FAM58A	0.00541369	-1	439	GroupHCHWA_D	0.591789	1291	8
4.41283	-0.636474	0.00014891	PATZ1	0.00541904	-1	440	GroupHCHWA_D	0.580237	4817	8
2.98449	-1.20304	0.000149195	PRODH	0.00541904	-1	441	GroupHCHWA_D	0.627492	4816	9
4.05237	1.09835	0.000149418	TCIRG1	0.00541904	1	442	GroupHCHWA_D	0.659651	3041	9
6.15051	-0.541064	0.000149996	COPS7A	0.00541904	-1	443	GroupHCHWA_D	0.550108	2305	7
5.31992	-0.733127	0.000150078	ME3	0.00541904	-1	444	GroupHCHWA_D	0.580458	2579	8
4.345	-0.982649	0.000150859	SVEP1	0.00543498	-1	445	GroupHCHWA_D	0.478733	12343	5
6.91569	0.75472	0.000151354	FLCN	0.00543807	1	446	GroupHCHWA_D	0.559477	4052	7
6.55486	0.914687	0.000151623	AHSA1	0.00543807	1	447	GroupHCHWA_D	0.517143	1400	6
4.60383	-1.37891	0.000156318	NEUROD6	0.00559397	-1	448	GroupHCHWA_D	0.402591	2161	2
6.16526	-0.839634	0.00015897	AP3M2	0.00567618	-1	449	GroupHCHWA_D	0.457766	3670	4
5.44167	0.679818	0.000162457	FBRS	0.00578779	1	450	GroupHCHWA_D	0.657984	4108	9
5.28074	0.600137	0.000163188	PNRC2	0.00580096	1	451	GroupHCHWA_D	0.382353	2414	1
6.7501	0.630166	0.000166681	NAV2	0.00591203	1	452	GroupHCHWA_D	0.521772	11758	6
2.53167	1.24648	0.000168218	NRSN2-AS1	0.00594125	1	453	GroupHCHWA_D	0.444046	1394	3
1.75497	2.29558	0.000168246	DRAXIN	0.00594125	1	454	GroupHCHWA_D	0.617597	1773	9
4.33818	0.939605	0.000169661	TNFRSF1A	0.00597803	1	455	GroupHCHWA_D	0.575472	2226	7
3.69356	1.68153	0.000170554	HSPA1L	0.00598519	1	456	GroupHCHWA_D	0.495546	12685	5
5.75678	1.16719	0.000170849	DOT1L	0.00598519	1	457	GroupHCHWA_D	0.62695	7436	9
7.31894	-0.46359	0.000171114	TAOK2	0.00598519	-1	458	GroupHCHWA_D	0.620332	6561	9
4.85935	-0.565833	0.000171357	STX17	0.00598519	-1	459	GroupHCHWA_D	0.397655	6908	2
4.43738	-0.906163	0.000172055	PNMA6A	0.0059965	-1	460	GroupHCHWA_D	0.651888	2278	9
5.20615	-0.629926	0.000173378	NLN	0.00601676	-1	461	GroupHCHWA_D	0.412193	8661	2
3.2109	-0.9437	0.000173387	TLL2	0.00601676	-1	462	GroupHCHWA_D	0.485157	6771	5
2.15456	1.3909	0.000175751	BTBD19	0.00607747	1	463	GroupHCHWA_D	0.641858	1572	9
6.01975	-0.702965	0.000175895	SLC11A2	0.00607747	-1	464	GroupHCHWA_D	0.435268	6805	3
4.0438	-0.607684	0.000177765	TAF6L	0.00611881	-1	465	GroupHCHWA_D	0.640662	2115	9
1.00548	2.39894	0.000178585	LINC00960	0.00611881	1	466	GroupHCHWA_D	0.52876	1443	6
6.58593	0.602965	0.000178741	RRAGD	0.00611881	1	467	GroupHCHWA_D	0.420422	4926	2
5.21913	-0.717557	0.000178991	PIGK	0.00611881	-1	468	GroupHCHWA_D	0.350703	4625	1
6.70574	1.30392	0.000179289	PPP1R15A	0.00611881	1	469	GroupHCHWA_D	0.588334	2383	8
8.44815	-0.738404	0.000179396	ATP5B	0.00611881	-1	470	GroupHCHWA_D	0.512208	1843	6
8.58253	-0.700396	0.000179763	ATP8A1	0.00611881	-1	471	GroupHCHWA_D	0.388516	8342	1
4.88222	-0.766188	0.000181844	ASB13	0.00617652	-1	472	GroupHCHWA_D	0.558048	2808	7
3.19815	2.99323	0.000183533	SPOCD1	0.00622072	1	473	GroupHCHWA_D	0.613074	3962	8
6.10672	-0.712674	0.000185982	SLC6A15	0.00629041	-1	474	GroupHCHWA_D	0.357863	7841	1
6.76134	0.947304	0.000186574	EZR	0.00629717	1	475	GroupHCHWA_D	0.523181	3257	6
4.6142	1.00788	0.000187643	AMZ1	0.0063146	1	476	GroupHCHWA_D	0.60093	4518	8
0.721046	1.53364	0.000187878	RPS15AP10	0.0063146	1	477	GroupHCHWA_D	0.405525	905	2
3.02188	0.858523	0.000189412	C19orf44	0.00635282	1	478	GroupHCHWA_D	0.560688	3897	7
8.07837	0.711813	0.00019131	DTNA	0.00640309	1	479	GroupHCHWA_D	0.418384	10727	2
3.03206	-0.841895	0.000192426	MYO15A	0.00642701	-1	480	GroupHCHWA_D	0.617888	11863	9
2.8301	1.10309	0.000194004	LOC284023	0.00646627	1	481	GroupHCHWA_D	0.481584	2525	5
2.44305	1.09585	0.000194452	SP2	0.00646773	1	482	GroupHCHWA_D	0.564267	3112	7
5.71115	0.704792	0.000196091	AUTS2	0.00650876	1	483	GroupHCHWA_D	0.538253	7006	6
2.96694	0.799952	0.000197557	PPAPDC1B	0.00654388	1	484	GroupHCHWA_D	0.428952	2625	3
5.81917	0.508177	0.000199475	CDK12	0.00659297	1	485	GroupHCHWA_D	0.459012	8283	4
7.78767	0.998213	0.000199862	SOD2	0.00659297	1	486	GroupHCHWA_D	0.449887	1776	4
4.66504	0.698743	0.000201312	SCAF4	0.00662716	1	487	GroupHCHWA_D	0.510424	4269	6
4.6023	-0.968245	0.000202739	NDUFA11	0.00666049	-1	488	GroupHCHWA_D	0.62049	2938	9
8.76634	-0.604686	0.000204146	DNAJC6	0.00667246	-1	489	GroupHCHWA_D	0.434177	6320	3
5.35157	-0.547351	0.000204244	UQCRFS1	0.00667246	-1	490	GroupHCHWA_D	0.504902	1224	5
4.27779	1.00352	0.000204353	SNHG7	0.00667246	1	491	GroupHCHWA_D	0.565396	2676	7
4.52656	0.770606	0.000205234	ETV6	0.00668212	1	492	GroupHCHWA_D	0.473737	5978	4
5.7972	0.774468	0.000205482	PPP4R2	0.00668212	1	493	GroupHCHWA_D	0.411081	1462	2
7.79458	-0.592552	0.000206147	ACSL6	0.00669018	-1	494	GroupHCHWA_D	0.422415	6915	3
3.99665	1.00543	0.000207094	ATOH8	0.00670735	1	495	GroupHCHWA_D	0.575303	5863	7
1.66772	-1.23447	0.000209701	ABCC12	0.00677807	-1	496	GroupHCHWA_D	0.495937	5168	5
1.09665	2.05481	0.000212501	MHRT	0.00685476	1	497	GroupHCHWA_D	0.598174	876	8
5.00589	-0.521451	0.000213318	CAD	0.00686731	-1	498	GroupHCHWA_D	0.578859	7114	8
3.49318	1.96511	0.000214102	COL1A1	0.00687871	1	499	GroupHCHWA_D	0.615151	5927	8
5.47056	0.649746	0.000215628	ADRB1	0.00691391	1	500	GroupHCHWA_D	0.575122	2862	7
7.58394	-0.63774	0.000216513	CLCN3	0.0069284	-1	501	GroupHCHWA_D	0.406508	6669	2
2.05607	1.54326	0.000219272	HSP90AB4P	0.00700233	1	502	GroupHCHWA_D	0.444338	3135	3
3.43022	-1.0322	0.000219696	SRD5A3	0.00700233	-1	503	GroupHCHWA_D	0.434207	4081	3
5.93041	0.535862	0.000222441	KDM3A	0.00707573	1	504	GroupHCHWA_D	0.450183	4918	4
3.06174	1.47676	0.000223893	ZDHHC11	0.00710782	1	505	GroupHCHWA_D	0.547966	2606	7
5.32247	0.606081	0.000225157	SPATA2	0.00711706	1	506	GroupHCHWA_D	0.52381	4305	6
3.10405	0.861351	0.000225195	LINC00963	0.00711706	1	507	GroupHCHWA_D	0.550424	2122	7
6.16154	0.823765	0.000225516	ZC3H18	0.00711706	1	508	GroupHCHWA_D	0.584101	3799	8
4.00401	1.49322	0.000226077	IL1R1	0.00712076	1	509	GroupHCHWA_D	0.442666	5311	3
3.39143	1.04625	0.000226667	SYNC	0.00712536	1	510	GroupHCHWA_D	0.45949	3493	4
3.36311	1.09992	0.000227461	NFKBIZ	0.00713631	1	511	GroupHCHWA_D	0.46152	4197	4
7.2171	-0.530109	0.000228222	OGDH	0.00714234	-1	512	GroupHCHWA_D	0.558264	4840	7
3.60754	1.27033	0.000228544	SH3BGR	0.00714234	1	513	GroupHCHWA_D	0.458009	1286	4
5.69452	0.925186	0.000229228	SWAP70	0.00714848	1	514	GroupHCHWA_D	0.427079	4882	3
7.90579	-0.817643	0.000229953	DMXL2	0.00714848	-1	515	GroupHCHWA_D	0.40702	10599	2
4.40597	-0.638635	0.000230087	KBTBD4	0.00714848	-1	516	GroupHCHWA_D	0.499402	2507	5
4.7841	2.29971	0.000230702	NGFR	0.00714848	1	517	GroupHCHWA_D	0.627778	3420	9
3.61362	1.26958	0.000231486	RILPL2	0.00714848	1	518	GroupHCHWA_D	0.534703	1801	6
6.31136	0.516652	0.000231926	BAZ2A	0.00714848	1	519	GroupHCHWA_D	0.527404	9141	6
2.44248	1.93266	0.000232127	HMGN5	0.00714848	1	520	GroupHCHWA_D	0.338194	2126	1
5.74857	-0.659978	0.000232308	KBTBD6	0.00714848	-1	521	GroupHCHWA_D	0.431523	5228	3
2.74942	-0.904592	0.000243092	CYB561D2	0.007466	-1	522	GroupHCHWA_D	0.606775	2332	8
1.42866	1.54415	0.000243776	CLEC2B	0.00747036	1	523	GroupHCHWA_D	0.363101	2038	1
4.22555	-0.770304	0.000244166	DDX25	0.00747036	-1	524	GroupHCHWA_D	0.469466	1834	4
7.44636	-0.762665	0.000244723	ATP6V0E2	0.00747315	-1	525	GroupHCHWA_D	0.621564	2801	9
8.94103	-0.727963	0.000246389	SCN2A	0.00750973	-1	526	GroupHCHWA_D	0.396148	9191	2
1.3405	1.19859	0.000248835	DLGAP1-AS1	0.00756987	1	527	GroupHCHWA_D	0.494461	993	5
8.53463	-0.771179	0.000250022	ATP6V1A	0.00759159	-1	528	GroupHCHWA_D	0.405835	4593	2
1.18754	1.85225	0.000251048	HIF1A-AS2	0.00760831	1	529	GroupHCHWA_D	0.299854	2051	1
5.25349	-1.07827	0.00025298	ETV1	0.00765242	-1	530	GroupHCHWA_D	0.393297	7638	1
4.75998	-0.681573	0.000253569	MPI	0.00765579	-1	531	GroupHCHWA_D	0.54115	3062	7
3.47004	0.948422	0.000254977	FAM222B	0.00768228	1	532	GroupHCHWA_D	0.534629	4837	6
4.12113	0.885671	0.000255405	ZSCAN31	0.00768228	1	533	GroupHCHWA_D	0.43807	3399	3
4.54478	0.830368	0.00025664	C22orf46	0.00770496	1	534	GroupHCHWA_D	0.52804	4975	6
3.03286	-0.751696	0.00026071	PGBD4	0.00780641	-1	535	GroupHCHWA_D	0.426661	2318	3
4.47846	-0.620952	0.000261254	MINA	0.00780641	-1	536	GroupHCHWA_D	0.421191	5342	2
4.65044	-0.637392	0.000262352	PEX11B	0.00780641	-1	537	GroupHCHWA_D	0.512479	2404	6
6.71399	-0.650236	0.000262546	TECPR1	0.00780641	-1	538	GroupHCHWA_D	0.620888	5745	9
7.92881	-0.880785	0.000262702	NCALD	0.00780641	-1	539	GroupHCHWA_D	0.470025	4487	4
6.00296	0.512228	0.00026294	PPP4R3A	0.00780641	1	540	GroupHCHWA_D	0.448082	4613	3
3.62407	-2.00546	0.000264568	TMEM125	0.00783294	-1	541	GroupHCHWA_D	0.603583	1786	8
6.58007	0.679319	0.000265178	GRIK5	0.00783294	1	542	GroupHCHWA_D	0.619623	4301	9
6.77088	-0.739503	0.0002653	NDUFA5	0.00783294	-1	543	GroupHCHWA_D	0.361512	6506	1
4.25713	-0.870713	0.000266983	MRPS18B	0.00786815	-1	544	GroupHCHWA_D	0.526728	10738	6
6.15039	1.01528	0.000269595	PNN	0.00793055	1	545	GroupHCHWA_D	0.40904	3606	2
3.05865	-0.740133	0.000271571	KLHL13	0.00797403	-1	546	GroupHCHWA_D	0.430369	4768	3
7.39877	0.694365	0.000272864	IRF2BP2	0.00799735	1	547	GroupHCHWA_D	0.480377	4663	5
3.38532	1.28277	0.000275834	SCX	0.00806889	1	548	GroupHCHWA_D	0.693918	1003	9
8.87458	-0.630195	0.000276311	PRKAR1A	0.00806889	-1	549	GroupHCHWA_D	0.425024	5235	3
6.83673	0.889105	0.000277916	GNA12	0.00810064	1	550	GroupHCHWA_D	0.555514	5395	7
7.37446	0.909925	0.000278409	PTMA	0.00810064	1	551	GroupHCHWA_D	0.456504	1207	4
4.58002	1.09932	0.000279975	PFDN2	0.00811259	1	552	GroupHCHWA_D	0.517134	642	6
4.70262	0.849502	0.000280272	NUDT9	0.00811259	1	553	GroupHCHWA_D	0.428977	2816	3
3.15665	1.14626	0.000280338	LOC286437	0.00811259	1	554	GroupHCHWA_D	0.42321	2318	3
3.64871	-0.650968	0.000280853	KIF22	0.00811286	-1	555	GroupHCHWA_D	0.583161	2423	8
7.3215	1.01417	0.000283651	HSPD1	0.00817895	1	556	GroupHCHWA_D	0.437603	2436	3
5.53992	0.731019	0.000284938	ATP1B3	0.0082013	1	557	GroupHCHWA_D	0.421479	1853	2
2.70614	0.943846	0.000285846	RNFT1	0.0082127	1	558	GroupHCHWA_D	0.376984	2016	1
4.73989	0.877048	0.000288184	NAA16	0.00826218	1	559	GroupHCHWA_D	0.386542	4592	1
4.31421	-0.841237	0.000288599	KIF17	0.00826218	-1	560	GroupHCHWA_D	0.636652	4098	9
6.29296	-1.03063	0.000289172	SREBF1	0.00826382	-1	561	GroupHCHWA_D	0.634273	5001	9
6.97818	0.942367	0.000290538	SAFB	0.00827957	1	562	GroupHCHWA_D	0.55527	3112	7
7.72652	-0.502947	0.000290756	OPA1	0.00827957	-1	563	GroupHCHWA_D	0.383644	6493	1
7.0031	0.809642	0.000291967	NFIC	0.00829852	1	564	GroupHCHWA_D	0.593168	8168	8
6.29191	0.635627	0.000292457	ZMIZ2	0.00829852	1	565	GroupHCHWA_D	0.616049	5209	9
3.16019	1.18571	0.000293234	TGIF1	0.00830587	1	566	GroupHCHWA_D	0.565965	4131	7
3.68101	0.832516	0.000294937	MTHFD2L	0.00832295	1	567	GroupHCHWA_D	0.369648	2359	1
6.13227	0.720867	0.000295494	FBRSL1	0.00832295	1	568	GroupHCHWA_D	0.661975	4547	9
4.20967	0.831984	0.000295815	UBXN2A	0.00832295	1	569	GroupHCHWA_D	0.407818	1893	2
7.2401	0.62735	0.000295913	ELAVL3	0.00832295	1	570	GroupHCHWA_D	0.578385	4682	8
5.78658	1.41764	0.000296463	AHSA2	0.00832381	1	571	GroupHCHWA_D	0.505444	3031	5
6.71082	-0.576756	0.000298234	GRIA4	0.0083589	-1	572	GroupHCHWA_D	0.404509	7629	2
4.45679	1.28868	0.000299417	SOX4	0.0083768	1	573	GroupHCHWA_D	0.525215	4878	6
5.97815	-0.606244	0.00030073	MTMR7	0.0083768	-1	574	GroupHCHWA_D	0.395877	5287	2
5.24538	-0.550859	0.000300943	NDUFA9	0.0083768	-1	575	GroupHCHWA_D	0.443754	1609	3
1.03458	-1.48529	0.000301258	CAPN13	0.0083768	-1	576	GroupHCHWA_D	0.520507	2682	6
3.76904	-0.630097	0.000301485	FAM76A	0.0083768	-1	577	GroupHCHWA_D	0.423822	3459	3
6.65638	0.613383	0.000302755	MLLT1	0.00839227	1	578	GroupHCHWA_D	0.634184	4505	9
3.10895	-0.70892	0.000303089	RTN4IP1	0.00839227	-1	579	GroupHCHWA_D	0.44044	2636	3
6.23408	-0.585117	0.000305447	KIAA1715	0.0084302	-1	580	GroupHCHWA_D	0.387745	8258	1
3.7829	0.864719	0.000305564	BANF1	0.0084302	1	581	GroupHCHWA_D	0.552083	1152	7
4.03457	0.765327	0.000306036	ZCCHC8	0.0084302	1	582	GroupHCHWA_D	0.437603	4255	3
2.07697	1.5087	0.000307341	DBH-AS1	0.00844051	1	583	GroupHCHWA_D	0.607255	2233	8
4.29952	0.710234	0.000307464	CDK2AP2	0.00844051	1	584	GroupHCHWA_D	0.645287	1793	9
7.33329	1.34999	0.000309402	SLC5A3	0.00847921	1	585	GroupHCHWA_D	0.384668	11623	1
0.486156	-1.56272	0.0003109	SUSD3	0.00850572	-1	586	GroupHCHWA_D	0.577677	1326	8
5.0374	0.838465	0.000311735	CCDC117	0.00851402	1	587	GroupHCHWA_D	0.420304	4078	2
7.76307	-0.558268	0.000312407	RLIM	0.00851787	-1	588	GroupHCHWA_D	0.394299	10629	1
7.12284	-0.459272	0.000315121	VPS35	0.00857729	-1	589	GroupHCHWA_D	0.409132	3285	2
2.88695	1.20316	0.000316419	ABHD3	0.00858958	1	590	GroupHCHWA_D	0.417732	2504	2
5.71355	0.586407	0.000316644	ZNF37A	0.00858958	1	591	GroupHCHWA_D	0.411581	7029	2
4.69533	-0.585988	0.000319046	UROD	0.00864011	-1	592	GroupHCHWA_D	0.549383	1458	7
7.4432	0.760898	0.00032102	MCF2L2	0.00867604	1	593	GroupHCHWA_D	0.495512	5013	5
4.47196	0.72299	0.000321545	GPR137B	0.00867604	1	594	GroupHCHWA_D	0.462782	2042	4
8.58478	0.721893	0.000321996	KIF5B	0.00867604	1	595	GroupHCHWA_D	0.391747	5889	1
3.86398	-0.714894	0.000322687	BPGM	0.00868005	-1	596	GroupHCHWA_D	0.443049	2230	3
3.44957	0.828068	0.000323404	TRAF3IP2	0.00868479	1	597	GroupHCHWA_D	0.465629	6488	4
9.83249	2.67838	0.000324196	NPTX2	0.00869149	1	598	GroupHCHWA_D	0.591596	2713	8
1.24805	1.3276	0.000325372	LOC100129617	0.00870845	1	599	GroupHCHWA_D	0.493493	1921	5
4.90623	1.05945	0.000328227	MATN2	0.00875207	1	600	GroupHCHWA_D	0.48296	4108	5
2.48908	1.35746	0.00032908	FOXF1	0.00875207	1	601	GroupHCHWA_D	0.554645	2562	7
10.9547	0.637246	0.000329247	KIF5A	0.00875207	1	602	GroupHCHWA_D	0.532204	3897	6
5.26277	-0.662071	0.000329715	WDR81	0.00875207	-1	603	GroupHCHWA_D	0.642724	14451	9
3.36031	-0.91202	0.000329731	NUDT18	0.00875207	-1	604	GroupHCHWA_D	0.64187	1519	9
3.11958	-0.796045	0.000330323	SARS2	0.0087533	-1	605	GroupHCHWA_D	0.610955	2136	8
3.96313	-0.779687	0.00033193	CNIH3	0.00878135	-1	606	GroupHCHWA_D	0.529933	2372	6
6.91019	-0.589752	0.000333306	PPM1H	0.00880322	-1	607	GroupHCHWA_D	0.482981	6199	5
4.78404	0.614864	0.000335824	NCOA5	0.00885516	1	608	GroupHCHWA_D	0.518553	3207	6
5.38981	-0.62516	0.000338196	TENM1	0.00890306	-1	609	GroupHCHWA_D	0.42209	12893	2
1.91654	-0.990014	0.000339698	PARTICL	0.00891298	-1	610	GroupHCHWA_D	0.548592	1420	7
1.75139	1.43615	0.000339897	UCKL1-AS1	0.00891298	1	611	GroupHCHWA_D	0.618034	3571	9
5.83974	0.7556	0.000340241	SBK1	0.00891298	1	612	GroupHCHWA_D	0.645032	4992	9
2.55143	1.11588	0.000341388	SNAP25-AS1	0.00891414	1	613	GroupHCHWA_D	0.378506	2959	1
3.50032	-0.767042	0.000341397	MORN1	0.00891414	-1	614	GroupHCHWA_D	0.614456	6378	8
7.46084	-0.550577	0.00034311	HNRNPDL	0.00893527	-1	615	GroupHCHWA_D	0.449706	4245	4
5.91103	0.78044	0.000343501	HNRNPA0	0.00893527	1	616	GroupHCHWA_D	0.485339	2967	5
3.12391	1.08705	0.000343879	SNAPC1	0.00893527	1	617	GroupHCHWA_D	0.376506	2656	1
2.69878	-1.05935	0.000345244	ADAMTSL1	0.0089387	-1	618	GroupHCHWA_D	0.543272	7996	7
3.80336	-0.745739	0.000345303	TIMM17B	0.0089387	-1	619	GroupHCHWA_D	0.601818	1100	8
5.10389	1.30023	0.000345784	RTN4RL2	0.0089387	1	620	GroupHCHWA_D	0.690541	2220	9
7.43095	0.694368	0.000346446	RBM39	0.0089387	1	621	GroupHCHWA_D	0.425969	3019	3
5.47207	-0.600363	0.000346798	FKBP9	0.0089387	-1	622	GroupHCHWA_D	0.515809	3732	6
4.78035	-0.570426	0.000347726	TBL3	0.00894822	-1	623	GroupHCHWA_D	0.638396	2594	9
5.01165	1.09123	0.000349303	SMTN	0.00897439	1	624	GroupHCHWA_D	0.643377	3850	9
5.0391	-0.625385	0.000351299	CAND2	0.0089984	-1	625	GroupHCHWA_D	0.599521	4592	8
3.86838	0.934952	0.00035136	ZIC2	0.0089984	1	626	GroupHCHWA_D	0.588908	2975	8
5.10593	0.835505	0.000352385	RBM14	0.00901027	1	627	GroupHCHWA_D	0.531348	5407	6
2.1735	1.27429	0.000353692	LINC01561	0.00902928	1	628	GroupHCHWA_D	0.516782	2175	6
2.80367	0.934687	0.00035507	DNASE1	0.00905006	1	629	GroupHCHWA_D	0.539057	3098	6
1.72614	-1.20287	0.000356244	HIST1H4I	0.00906556	-1	630	GroupHCHWA_D	0.610811	370	8
3.24165	0.877585	0.000358498	SOX1	0.00910846	1	631	GroupHCHWA_D	0.544304	4108	7
5.29487	0.624285	0.000359124	EIF3J	0.00910993	1	632	GroupHCHWA_D	0.385848	2558	1
5.79057	0.74909	0.000360321	CELF3	0.00911222	1	633	GroupHCHWA_D	0.54235	5856	7
7.90084	-0.421262	0.000360351	CKAP5	0.00911222	-1	634	GroupHCHWA_D	0.443849	6714	3
8.83193	-0.737222	0.000361795	CNTN1	0.00913433	-1	635	GroupHCHWA_D	0.381773	7308	1
5.30476	1.00919	0.000363413	HNRNPU-AS1	0.00916074	1	636	GroupHCHWA_D	0.354609	5045	1
5.13882	0.526241	0.000364486	ZNF800	0.00917337	1	637	GroupHCHWA_D	0.390065	4489	1
5.57901	2.21716	0.000367399	HS3ST2	0.0092322	1	638	GroupHCHWA_D	0.559939	1952	7
2.69332	1.50445	0.000370245	LOC100507387	0.00928916	1	639	GroupHCHWA_D	0.417787	967	2
6.95314	0.962574	0.000374557	PTGES3	0.00937418	1	640	GroupHCHWA_D	0.458959	3399	4
1.89776	2.25445	0.000374804	PCK1	0.00937418	1	641	GroupHCHWA_D	0.508752	2685	6
6.19169	-0.690282	0.000377294	ANKRD46	0.00942178	-1	642	GroupHCHWA_D	0.44795	4342	3
5.9783	0.869465	0.000378768	ZNF516	0.00942982	1	643	GroupHCHWA_D	0.532808	8626	6
4.96799	1.19273	0.000378793	HUNK	0.00942982	1	644	GroupHCHWA_D	0.511713	7385	6
6.60013	0.689042	0.000379721	DLGAP4	0.00943826	1	645	GroupHCHWA_D	0.616867	6071	9
3.01293	2.24711	0.000384329	TNFRSF12A	0.00953803	1	646	GroupHCHWA_D	0.642442	1032	9
3.58233	0.944717	0.000389639	ZNF586	0.00965486	1	647	GroupHCHWA_D	0.453744	2270	4
1.52057	1.29942	0.00039038	ERC2-IT1	0.00965829	1	648	GroupHCHWA_D	0.463479	2259	4
5.62339	1.78769	0.000402185	MAFF	0.00993109	1	649	GroupHCHWA_D	0.591304	2530	8
3.38674	-0.725176	0.000402645	ERMARD	0.00993109	-1	650	GroupHCHWA_D	0.444644	4444	3
5.00725	0.622601	0.00040347	FBXO30	0.00993615	1	651	GroupHCHWA_D	0.375312	4407	1
3.85254	1.27651	0.000404366	DLL4	0.00994293	1	652	GroupHCHWA_D	0.597076	3420	8
6.79648	-0.718141	0.000405291	PCDH17	0.00995042	-1	653	GroupHCHWA_D	0.470596	8009	4
6.21283	-0.955872	0.000407948	CRYM	0.00997453	-1	654	GroupHCHWA_D	0.514432	1559	6
6.6984	0.692396	0.000408097	BHLHE40	0.00997453	1	655	GroupHCHWA_D	0.50857	3034	6
2.67883	1.67213	0.000408139	FAM153A	0.00997453	1	656	GroupHCHWA_D	0.531773	1794	6
5.78643	0.779362	0.000414686	ANXA5	0.0101191	1	657	GroupHCHWA_D	0.442151	1599	3
0.952817	2.22951	0.00041702	MOB4	0.0101606	1	658	GroupHCHWA_D	0.356473	3947	1
3.49553	1.15722	0.000419554	MGST1	0.0102015	1	659	GroupHCHWA_D	0.35514	2354	1
4.27758	0.65796	0.000419973	CSNK2A2	0.0102015	1	660	GroupHCHWA_D	0.50965	1658	6
5.32318	0.56196	0.000421507	CHST11	0.0102092	1	661	GroupHCHWA_D	0.481449	5768	5
3.69363	3.25414	0.000421563	LINC01164	0.0102092	1	662	GroupHCHWA_D	0.554078	3384	7
5.90587	-0.473133	0.000423334	CMTR1	0.0102366	-1	663	GroupHCHWA_D	0.537342	4124	6
0.745249	1.47337	0.000425183	LINC00260	0.0102654	1	664	GroupHCHWA_D	0.484706	1275	5
4.83043	1.13631	0.000426073	DDIT3	0.0102654	1	665	GroupHCHWA_D	0.483871	1178	5
7.868	0.789703	0.000426445	DNAJA1	0.0102654	1	666	GroupHCHWA_D	0.452536	1538	4
1.84817	-1.00177	0.000427987	SCAMP1-AS1	0.0102758	-1	667	GroupHCHWA_D	0.514839	1550	6
8.08884	0.571056	0.000428244	GIT1	0.0102758	1	668	GroupHCHWA_D	0.62633	3760	9
2.79826	-0.720294	0.00042886	WDYHV1	0.0102758	-1	669	GroupHCHWA_D	0.436788	1669	3
2.83107	0.847657	0.000429583	GPR146	0.0102758	1	670	GroupHCHWA_D	0.6055	2218	8
1.30002	1.76128	0.000430472	CYP39A1	0.0102758	1	671	GroupHCHWA_D	0.38257	2444	1
1.35244	-1.51868	0.000431636	NAPSB	0.0102758	-1	672	GroupHCHWA_D	0.595489	1330	8
1.60284	1.78217	0.000431904	ATE1-AS1	0.0102758	1	673	GroupHCHWA_D	0.512093	951	6
2.67838	1.61132	0.000432581	C17orf67	0.0102758	1	674	GroupHCHWA_D	0.507455	2012	6
3.0284	-0.749982	0.000432645	YEATS4	0.0102758	-1	675	GroupHCHWA_D	0.403065	1501	2
8.09264	-1.12812	0.000435634	TUBA1A	0.0103315	-1	676	GroupHCHWA_D	0.544023	2476	7
4.33913	0.714796	0.000438809	ZNF808	0.0103771	1	677	GroupHCHWA_D	0.409846	3311	2
7.50314	-0.690117	0.000439277	DDB1	0.0103771	-1	678	GroupHCHWA_D	0.527319	4356	6
2.3219	1.22502	0.0004395	LINC00622	0.0103771	1	679	GroupHCHWA_D	0.37673	1590	1
5.00594	0.852119	0.000440814	MXD1	0.0103928	1	680	GroupHCHWA_D	0.428241	5616	3
3.12998	0.785531	0.000442219	MPLKIP	0.0103997	1	681	GroupHCHWA_D	0.493092	941	5
8.22386	-0.700456	0.000442401	MDH1	0.0103997	-1	682	GroupHCHWA_D	0.468933	1883	4
6.02948	1.51656	0.000448727	HERC2P3	0.0105126	1	683	GroupHCHWA_D	0.509231	4279	6
5.49207	-0.559957	0.000448893	RPS6KL1	0.0105126	-1	684	GroupHCHWA_D	0.559384	5195	7
5.40871	1.67464	0.000449174	CD44	0.0105126	1	685	GroupHCHWA_D	0.438455	6678	3
4.00276	0.86289	0.000456752	GKAP1	0.0106744	1	686	GroupHCHWA_D	0.44047	1873	3
6.82749	-0.597321	0.000459701	OXCT1	0.0107277	-1	687	GroupHCHWA_D	0.435357	3558	3
4.1598	1.09311	0.000461191	BGN	0.0107468	1	688	GroupHCHWA_D	0.614566	2444	8
6.87389	-0.611717	0.000462297	SCG5	0.010757	-1	689	GroupHCHWA_D	0.467846	2488	4
3.96294	-0.627128	0.000463191	COX14	0.0107586	-1	690	GroupHCHWA_D	0.582583	999	8
2.23778	-1.30005	0.00046371	AIF1	0.0107586	-1	691	GroupHCHWA_D	0.531143	9312	6
5.67988	-0.528066	0.000465089	VPS18	0.010775	-1	692	GroupHCHWA_D	0.605648	3895	8
7.58176	-0.48554	0.000472656	ATRN	0.0109265	-1	693	GroupHCHWA_D	0.476234	8731	5
4.89643	0.958716	0.000472992	ZFP36L2	0.0109265	1	694	GroupHCHWA_D	0.544002	3693	7
8.01729	0.705012	0.000474693	RPL3	0.01095	1	695	GroupHCHWA_D	0.544096	1338	7
3.88729	1.60424	0.000476365	GEM	0.0109621	1	696	GroupHCHWA_D	0.45213	2183	4
5.36428	0.717482	0.000477526	HERPUD1	0.0109621	1	697	GroupHCHWA_D	0.494277	1922	5
2.48388	1.56572	0.000478383	GBP3	0.0109621	1	698	GroupHCHWA_D	0.417105	3040	2
1.46114	2.53601	0.000478735	C2CD4A	0.0109621	1	699	GroupHCHWA_D	0.528882	3445	6
3.95365	1.10875	0.000479139	LOC100129917	0.0109621	1	700	GroupHCHWA_D	0.600588	1700	8
1.77026	1.4103	0.000479447	CASP4	0.0109621	1	701	GroupHCHWA_D	0.447109	1418	3
2.54675	1.06223	0.000480002	CCDC18	0.0109621	1	702	GroupHCHWA_D	0.362839	4790	1
6.78975	-0.64323	0.000481447	SLC30A9	0.0109685	-1	703	GroupHCHWA_D	0.395891	3261	2
1.99275	-1.10298	0.000481651	CALHM1	0.0109685	-1	704	GroupHCHWA_D	0.572644	3056	7
3.70048	-1.02263	0.000484061	LOC100294145	0.0110074	-1	705	GroupHCHWA_D	0.423001	29520	3
2.31439	1.1921	0.00048473	RAB27A	0.0110074	1	706	GroupHCHWA_D	0.39389	3699	1
5.50092	-0.523112	0.000485697	AAGAB	0.0110137	-1	707	GroupHCHWA_D	0.449501	3406	4
7.00315	0.637225	0.000488298	CXXC5	0.0110571	1	708	GroupHCHWA_D	0.625432	1447	9
4.39411	0.821497	0.000490161	RELA	0.0110836	1	709	GroupHCHWA_D	0.591156	2578	8
3.32806	-0.818123	0.000491721	ACADS	0.0111032	-1	710	GroupHCHWA_D	0.644466	2087	9
6.06542	-0.67786	0.000494356	RIMKLA	0.0111267	-1	711	GroupHCHWA_D	0.46362	10569	4
2.36461	-0.937789	0.000494361	B3GALT4	0.0111267	-1	712	GroupHCHWA_D	0.641044	8430	9
1.43396	2.90089	0.000494846	GNG10	0.0111267	1	713	GroupHCHWA_D	0.386454	1255	1
3.04641	1.4764	0.000496938	CRHR2	0.0111581	1	714	GroupHCHWA_D	0.58078	3590	8
1.28564	-0.993248	0.000502723	AURKA	0.0112723	-1	715	GroupHCHWA_D	0.473106	2547	4
5.7872	-0.445762	0.000504145	STRIP1	0.0112883	-1	716	GroupHCHWA_D	0.539907	3458	6
7.25925	-0.756162	0.000505224	TTYH1	0.0112967	-1	717	GroupHCHWA_D	0.646565	7628	9
5.18512	-0.866025	0.000507019	CUTA	0.0113211	-1	718	GroupHCHWA_D	0.57965	2398	8
4.20592	-0.833824	0.000509238	BCKDHA	0.0113233	-1	719	GroupHCHWA_D	0.607103	1774	8
5.10455	-0.649426	0.000509251	TMEM129	0.0113233	-1	720	GroupHCHWA_D	0.643285	2837	9
2.67925	0.992038	0.000509798	SNHG3	0.0113233	1	721	GroupHCHWA_D	0.470588	2346	4
2.68711	0.831468	0.000509944	SMIM3	0.0113233	1	722	GroupHCHWA_D	0.523993	2334	6
6.39973	0.771275	0.000511763	SCARA3	0.011348	1	723	GroupHCHWA_D	0.578288	3832	8
3.70124	0.818633	0.000513087	LMAN2L	0.0113485	1	724	GroupHCHWA_D	0.510238	2442	6
7.31561	-0.600684	0.000513201	GOT1	0.0113485	-1	725	GroupHCHWA_D	0.500705	2127	5
6.37379	2.67007	0.000514198	LAMB3	0.0113549	1	726	GroupHCHWA_D	0.587764	4495	8
3.84363	-0.636889	0.000515411	ASL	0.011366	-1	727	GroupHCHWA_D	0.611898	2118	8
4.36295	0.723788	0.000518193	STK17B	0.0114116	1	728	GroupHCHWA_D	0.368947	5307	1
5.36805	-0.584323	0.000519974	FH	0.0114351	-1	729	GroupHCHWA_D	0.435994	1867	3
6.91751	0.543957	0.000523289	HDGF	0.0114923	1	730	GroupHCHWA_D	0.566476	2798	7
3.82844	0.742542	0.000524121	BCORL1	0.0114948	1	731	GroupHCHWA_D	0.564975	7349	7
4.62749	0.509985	0.000526	USP42	0.0115203	1	732	GroupHCHWA_D	0.514258	5120	6
3.28581	-0.945093	0.000528862	FAHD2B	0.0115672	-1	733	GroupHCHWA_D	0.579447	1265	8
0.935788	-1.93092	0.000532645	TSPAN8	0.011634	-1	734	GroupHCHWA_D	0.39646	1130	2
6.50583	-0.506829	0.000533736	FAM179B	0.011642	-1	735	GroupHCHWA_D	0.420623	6488	2
5.14957	-0.763211	0.000536688	ABCD2	0.0116643	-1	736	GroupHCHWA_D	0.36173	5341	1
4.92359	-0.808711	0.00053674	ANAPC1	0.0116643	-1	737	GroupHCHWA_D	0.44545	7736	3
1.05005	1.71435	0.000536943	REP15	0.0116643	1	738	GroupHCHWA_D	0.407375	1139	2
2.46639	1.18558	0.000538162	NKAPL	0.011675	1	739	GroupHCHWA_D	0.45006	1662	4
6.99708	0.675443	0.000539772	HNRNPM	0.0116941	1	740	GroupHCHWA_D	0.545903	2636	7
8.00085	0.790321	0.000542082	FTH1	0.0117283	1	741	GroupHCHWA_D	0.501221	1229	5
3.72348	0.74125	0.000543202	CCDC86	0.011731	1	742	GroupHCHWA_D	0.604963	2015	8
5.25257	-1.29744	0.000543671	CHADL	0.011731	-1	743	GroupHCHWA_D	0.697987	2533	9
5.16949	-0.676499	0.000545569	RNF170	0.0117438	-1	744	GroupHCHWA_D	0.439131	5479	3
0.715744	-1.06966	0.000546232	ARSE	0.0117438	-1	745	GroupHCHWA_D	0.534858	2668	6
5.44745	0.595855	0.000547234	KLHL29	0.0117438	1	746	GroupHCHWA_D	0.568253	5084	7
5.33239	-1.02657	0.000547802	TMTC4	0.0117438	-1	747	GroupHCHWA_D	0.461198	3840	4
1.15952	1.58756	0.000548171	GDPD3	0.0117438	1	748	GroupHCHWA_D	0.567395	1098	7
3.00541	-0.844027	0.000548658	WDR54	0.0117438	-1	749	GroupHCHWA_D	0.579088	1119	8
4.62321	0.566323	0.000551109	LCA5	0.0117805	1	750	GroupHCHWA_D	0.374868	4719	1
2.89991	1.46416	0.000555111	MINOS1P1	0.0118502	1	751	GroupHCHWA_D	0.415863	2282	2
4.55464	0.610145	0.000558404	VPS37B	0.0119047	1	752	GroupHCHWA_D	0.591852	2749	8
5.23418	-0.581672	0.000560423	C9orf69	0.0119319	-1	753	GroupHCHWA_D	0.664275	3205	9
7.80774	0.523689	0.000561955	KMT2D	0.0119486	1	754	GroupHCHWA_D	0.590865	19419	8
4.90103	0.987397	0.000563243	MERTK	0.0119601	1	755	GroupHCHWA_D	0.469112	3626	4
7.43935	0.904719	0.000566244	GOLM1	0.012008	1	756	GroupHCHWA_D	0.482991	3263	5
8.31013	-0.499769	0.000569602	KIDINS220	0.0120632	-1	757	GroupHCHWA_D	0.437033	7361	3
3.81351	-1.07832	0.000571728	F8	0.0120923	-1	758	GroupHCHWA_D	0.421664	9204	2
2.21495	-1.28486	0.000575751	HLA-DMB	0.0121613	-1	759	GroupHCHWA_D	0.522548	11176	6
2.64097	1.07422	0.000577223	LOC643355	0.0121764	1	760	GroupHCHWA_D	0.455025	3035	4
7.31805	0.612838	0.000579611	PURA	0.0122107	1	761	GroupHCHWA_D	0.399509	5294	2
6.06855	-0.445215	0.000580629	VPS50	0.0122161	-1	762	GroupHCHWA_D	0.365654	5858	1
6.26407	0.691903	0.000582576	AHDC1	0.012241	1	763	GroupHCHWA_D	0.636993	6358	9
2.76328	3.1233	0.000583605	SECTM1	0.0122465	1	764	GroupHCHWA_D	0.632778	2282	9
3.89863	0.676129	0.00058743	SNX33	0.012304	1	765	GroupHCHWA_D	0.579647	3233	8
4.70328	0.779535	0.000588497	CFAP44	0.012304	1	766	GroupHCHWA_D	0.413986	10539	2
4.24237	-0.589461	0.000588647	AKR1A1	0.012304	-1	767	GroupHCHWA_D	0.56519	1580	7
4.08557	-0.556035	0.000593416	HAUS7	0.0123828	-1	768	GroupHCHWA_D	0.617672	2320	9
6.09891	0.697432	0.000593959	ATXN2L	0.0123828	1	769	GroupHCHWA_D	0.604515	4430	8
7.02868	-0.566394	0.000597146	DYNC1I1	0.0124331	-1	770	GroupHCHWA_D	0.483481	3390	5
2.92696	-0.833752	0.000598889	GSTZ1	0.0124532	-1	771	GroupHCHWA_D	0.580139	1722	8
7.254	0.639082	0.000599715	KIAA1462	0.0124542	1	772	GroupHCHWA_D	0.480323	9300	5
3.10697	1.27986	0.000601908	TRIP10	0.0124836	1	773	GroupHCHWA_D	0.584305	2230	8
3.3505	1.55165	0.000604272	SPHK1	0.0125164	1	774	GroupHCHWA_D	0.663832	2469	9
0.866221	-1.42069	0.000606096	MIR4767	0.012538	-1	775	GroupHCHWA_D	0.820513	78	9
3.90449	1.0452	0.000607567	NTN1	0.0125522	1	776	GroupHCHWA_D	0.624622	5954	9
6.21847	0.945638	0.000610483	CGNL1	0.0125962	1	777	GroupHCHWA_D	0.5062	7339	5
3.01471	2.11758	0.000613267	FOXJ1	0.0126348	1	778	GroupHCHWA_D	0.659848	2640	9
4.70076	0.946839	0.00061393	C19orf68	0.0126348	1	779	GroupHCHWA_D	0.650223	3588	9
6.42339	0.978334	0.000619756	AEBP1	0.0127354	1	780	GroupHCHWA_D	0.624327	4086	9
3.01686	-0.852914	0.000620405	PWP2	0.0127354	-1	781	GroupHCHWA_D	0.565951	6520	7
5.29453	-0.514195	0.000622195	C21orf2	0.0127445	-1	782	GroupHCHWA_D	0.64186	2795	9
2.51901	0.973716	0.000622439	PMS2CL	0.0127445	1	783	GroupHCHWA_D	0.455121	1738	4
3.32998	0.916738	0.000625744	GLB1L3	0.0127958	1	784	GroupHCHWA_D	0.521739	2944	6
5.88308	-0.631246	0.000628085	SLC35B4	0.0128213	-1	785	GroupHCHWA_D	0.439618	6815	3
6.2315	0.756914	0.000628587	RSRC2	0.0128213	1	786	GroupHCHWA_D	0.407423	2452	2
4.83233	-0.608591	0.000632244	SPIN3	0.0128795	-1	787	GroupHCHWA_D	0.415771	5580	2
0.575992	-1.30763	0.000633339	FAM86JP	0.0128854	-1	788	GroupHCHWA_D	0.543361	2041	7
5.96444	-0.662881	0.000634402	DNAJC18	0.0128907	-1	789	GroupHCHWA_D	0.457664	5102	4
5.49544	0.699291	0.000636085	SEPN1	0.0129085	1	790	GroupHCHWA_D	0.598107	4332	8
7.58463	0.647245	0.000638596	CALR	0.0129431	1	791	GroupHCHWA_D	0.540031	1911	7
7.36409	0.562874	0.000640017	FMN2	0.0129555	1	792	GroupHCHWA_D	0.548673	6441	7
3.04582	-0.735192	0.000641892	ZNF449	0.0129771	-1	793	GroupHCHWA_D	0.391476	4059	1
3.6862	-0.675406	0.000644384	ECT2	0.0130057	-1	794	GroupHCHWA_D	0.377556	4500	1
3.07018	1.42747	0.000644933	TPM3P9	0.0130057	1	795	GroupHCHWA_D	0.468963	2932	4
2.15234	1.27475	0.000648936	PGF	0.01307	1	796	GroupHCHWA_D	0.644689	1911	9
2.80437	0.972781	0.000653664	KIF9-AS1	0.0131487	1	797	GroupHCHWA_D	0.529528	2540	6
2.75672	-0.94307	0.000661911	PAXBP1-AS1	0.0132979	-1	798	GroupHCHWA_D	0.458534	3943	4
4.94365	1.04204	0.000663261	PASK	0.0133084	1	799	GroupHCHWA_D	0.537275	6224	6
2.80943	1.56292	0.000668146	E2F5	0.0133896	1	800	GroupHCHWA_D	0.427111	1859	3
0.983035	-1.32923	0.000670102	KAZALD1	0.0134121	-1	801	GroupHCHWA_D	0.624105	2514	9
4.18152	0.943775	0.000672678	SNRNP48	0.0134348	1	802	GroupHCHWA_D	0.381021	4173	1
7.53065	-0.393374	0.000672913	NDUFS1	0.0134348	-1	803	GroupHCHWA_D	0.413494	3572	2
4.96517	0.614605	0.000675223	POM121C	0.0134642	1	804	GroupHCHWA_D	0.568333	5861	7
6.66099	-0.620319	0.000677449	MTMR9	0.0134918	-1	805	GroupHCHWA_D	0.414045	7405	2
4.08368	-0.571438	0.000679335	TMEM62	0.0135125	-1	806	GroupHCHWA_D	0.486994	2768	5
4.61112	1.2925	0.000680557	LOC100132111	0.0135201	1	807	GroupHCHWA_D	0.584757	761	8
4.30026	0.68236	0.000681565	EXOSC3	0.0135233	1	808	GroupHCHWA_D	0.424226	1841	3
8.22617	-0.517344	0.000684668	DDX24	0.0135681	-1	809	GroupHCHWA_D	0.492198	5896	5
4.79624	1.11365	0.000688249	SMG1P3	0.0135941	1	810	GroupHCHWA_D	0.452296	5052	4
3.72953	-0.705749	0.000688535	ZRANB3	0.0135941	-1	811	GroupHCHWA_D	0.41414	7058	2
7.72183	1.06481	0.000689165	FKBP4	0.0135941	1	812	GroupHCHWA_D	0.511361	3741	6
5.26615	-0.591841	0.000690194	CFAP97	0.0135941	-1	813	GroupHCHWA_D	0.371949	6310	1
4.90479	-0.507234	0.000690218	SPPL2B	0.0135941	-1	814	GroupHCHWA_D	0.641415	3815	9
3.52949	-0.67192	0.000695435	GALE	0.0136588	-1	815	GroupHCHWA_D	0.588267	1858	8
5.79378	0.625242	0.000695848	H2AFZ	0.0136588	1	816	GroupHCHWA_D	0.456177	947	4
5.17271	0.609984	0.00069606	ABHD13	0.0136588	1	817	GroupHCHWA_D	0.338551	5302	1
4.03374	0.790554	0.00069841	ZNF785	0.0136881	1	818	GroupHCHWA_D	0.561715	3265	7
4.83206	-0.604899	0.000700396	ASMTL	0.0136932	-1	819	GroupHCHWA_D	0.624232	4556	9
2.30507	1.12986	0.00070199	AVIL	0.0136932	1	820	GroupHCHWA_D	0.487145	2995	5
4.17385	-0.691473	0.000702392	PGAP3	0.0136932	-1	821	GroupHCHWA_D	0.598148	2700	8
1.57161	1.45729	0.000703534	CACNA1C-AS1	0.0136932	1	822	GroupHCHWA_D	0.537668	2230	6
3.41385	-0.926436	0.000704742	FILIP1	0.0136932	-1	823	GroupHCHWA_D	0.428283	5452	3
3.92282	0.82793	0.000705079	THAP2	0.0136932	1	824	GroupHCHWA_D	0.342149	4840	1
1.43408	1.53198	0.000705691	MYBPH	0.0136932	1	825	GroupHCHWA_D	0.612957	1806	8
2.44601	1.05339	0.000705743	RHOJ	0.0136932	1	826	GroupHCHWA_D	0.447085	3619	3
2.34741	2.49052	0.000706352	CCL2	0.0136932	1	827	GroupHCHWA_D	0.413655	747	2
2.94794	-0.709325	0.000707423	NT5C	0.0136974	-1	828	GroupHCHWA_D	0.649952	1037	9
5.20958	-0.871618	0.000714254	CPNE4	0.0138129	-1	829	GroupHCHWA_D	0.460363	4516	4
5.87056	0.590715	0.000716019	PAK2	0.0138304	1	830	GroupHCHWA_D	0.399576	6139	2
4.38953	-0.471906	0.000719447	FBXO25	0.0138799	-1	831	GroupHCHWA_D	0.448177	2441	3
6.96583	-0.43672	0.000720883	MTMR4	0.0138909	-1	832	GroupHCHWA_D	0.488763	5829	5
3.03798	3.0521	0.000723428	CHI3L2	0.0139232	1	833	GroupHCHWA_D	0.490379	1611	5
8.00153	0.639278	0.000725087	PDZD2	0.0139384	1	834	GroupHCHWA_D	0.51297	11642	6
3.92754	1.13958	0.000729005	IRAIN	0.0139969	1	835	GroupHCHWA_D	0.600448	5356	8
8.47755	-0.403388	0.000731971	HECTD1	0.014037	-1	836	GroupHCHWA_D	0.434892	9177	3
3.34067	0.595642	0.000733157	ZNF764	0.014043	1	837	GroupHCHWA_D	0.587983	2796	8
7.73566	-0.613391	0.000736155	STXBP5L	0.0140703	-1	838	GroupHCHWA_D	0.386332	9365	1
6.37864	-0.495691	0.000736375	MTR	0.0140703	-1	839	GroupHCHWA_D	0.45018	10558	4
4.78044	1.82363	0.000737215	CYR61	0.0140703	1	840	GroupHCHWA_D	0.502835	2293	5
5.05634	0.941197	0.000743573	TRIM56	0.0141748	1	841	GroupHCHWA_D	0.585856	4723	8
7.37577	0.624915	0.000745659	ACTN1	0.0141976	1	842	GroupHCHWA_D	0.553152	3791	7
5.16763	-0.542527	0.000746583	TMEM237	0.0141984	-1	843	GroupHCHWA_D	0.429811	5763	3
4.52858	-0.827127	0.000755494	PCDH20	0.0143508	-1	844	GroupHCHWA_D	0.432489	4777	3
5.59968	-0.483053	0.000758023	EXOC2	0.0143818	-1	845	GroupHCHWA_D	0.44629	4636	3
5.17203	1.24437	0.000760008	SGK494	0.014392	1	846	GroupHCHWA_D	0.455941	3779	4
5.10099	0.746204	0.000760356	DHX34	0.014392	1	847	GroupHCHWA_D	0.61505	4372	8
4.07981	1.02652	0.00076451	KIAA1919	0.0144536	1	848	GroupHCHWA_D	0.436702	3918	3
3.57529	1.13784	0.000765889	DONSON	0.0144626	1	849	GroupHCHWA_D	0.453212	2522	4
5.003	0.591324	0.000772434	PRPF38A	0.014569	1	850	GroupHCHWA_D	0.426046	2772	3
5.04957	0.69939	0.00077394	EPS15L1	0.0145763	1	851	GroupHCHWA_D	0.538626	5152	6
1.97271	1.73721	0.000775445	COL8A1	0.0145763	1	852	GroupHCHWA_D	0.538984	3091	6
6.03976	-0.462454	0.000775548	PTCD3	0.0145763	-1	853	GroupHCHWA_D	0.430947	6734	3
3.86886	-0.653601	0.000777192	OPLAH	0.0145823	-1	854	GroupHCHWA_D	0.666088	4031	9
5.99543	0.977767	0.000778498	DEDD2	0.0145823	1	855	GroupHCHWA_D	0.623797	2286	9
6.7988	0.861283	0.000778631	FLT1	0.0145823	1	856	GroupHCHWA_D	0.421732	12010	2
6.68558	-0.664111	0.000779503	DOPEY1	0.0145823	-1	857	GroupHCHWA_D	0.416604	8022	2
5.39679	-0.779377	0.000783597	ABHD16A	0.0146295	-1	858	GroupHCHWA_D	0.569701	17367	7
1.13105	-1.07502	0.000783851	F7	0.0146295	-1	859	GroupHCHWA_D	0.573796	3198	7
4.69201	1.234	0.000785968	SCARNA17	0.0146519	1	860	GroupHCHWA_D	0.629454	421	9
6.12695	-0.737299	0.00079177	IDH2	0.0147392	-1	861	GroupHCHWA_D	0.589757	1855	8
5.3542	0.64118	0.00079294	PAPD5	0.0147392	1	862	GroupHCHWA_D	0.386588	8112	1
4.72059	-0.551075	0.00079341	SSBP1	0.0147392	-1	863	GroupHCHWA_D	0.446885	2504	3
3.97219	2.63961	0.000798665	PNOC	0.0148174	1	864	GroupHCHWA_D	0.552239	1340	7
5.28572	-0.434743	0.000800131	NUP93	0.0148174	-1	865	GroupHCHWA_D	0.486276	3716	5
7.55225	-0.457754	0.000800393	LPGAT1	0.0148174	-1	866	GroupHCHWA_D	0.387176	7782	1
3.22975	1.62344	0.000802111	FAM46A	0.0148203	1	867	GroupHCHWA_D	0.412865	5612	2
3.95947	1.61963	0.000802396	MYH7	0.0148203	1	868	GroupHCHWA_D	0.573576	6055	7
3.87157	-1.74434	0.000805638	CX3CR1	0.0148347	-1	869	GroupHCHWA_D	0.481816	3657	5
4.88272	-0.531662	0.000805798	TRAPPC13	0.0148347	-1	870	GroupHCHWA_D	0.357061	4341	1
3.95765	-1.53847	0.000806588	GPIHBP1	0.0148347	-1	871	GroupHCHWA_D	0.62489	2282	9
4.80492	1.37752	0.000807054	CCDC144CP	0.0148347	1	872	GroupHCHWA_D	0.399382	4204	2
3.69673	1.14196	0.000807804	ITPRIP	0.0148347	1	873	GroupHCHWA_D	0.540153	7185	7
4.75458	-0.508379	0.00080931	ZNF48	0.0148454	-1	874	GroupHCHWA_D	0.626374	3640	9
6.5092	-0.735758	0.000814184	ACTR1B	0.0148903	-1	875	GroupHCHWA_D	0.593003	2258	8
5.32651	-0.4842	0.000814531	TMEM160	0.0148903	-1	876	GroupHCHWA_D	0.722137	655	9
2.72256	1.21831	0.000814547	RGL3	0.0148903	1	877	GroupHCHWA_D	0.620851	2561	9
6.81847	-0.614835	0.000817054	RAB11A	0.0149191	-1	878	GroupHCHWA_D	0.372489	4929	1
2.72899	-1.04258	0.000820467	AGPAT9	0.0149644	-1	879	GroupHCHWA_D	0.461328	2922	4
3.49146	0.855392	0.000821706	MANF	0.01497	1	880	GroupHCHWA_D	0.514019	963	6
0.968855	-1.53646	0.000823298	TYMSOS	0.014982	-1	881	GroupHCHWA_D	0.554502	844	7
3.67419	0.573033	0.00082588	TMUB1	0.0149944	1	882	GroupHCHWA_D	0.673867	1898	9
3.95411	0.941617	0.000826585	FAM57B	0.0149944	1	883	GroupHCHWA_D	0.647733	1919	9
6.99297	0.774592	0.000826787	TRIM8	0.0149944	1	884	GroupHCHWA_D	0.594388	2744	8
0.831618	1.81083	0.000829091	CLEC18B	0.015011	1	885	GroupHCHWA_D	0.611426	1943	8
3.4996	0.735268	0.000829574	ZNF580	0.015011	1	886	GroupHCHWA_D	0.644895	1577	9
4.25803	-0.688242	0.000831539	TMEM150C	0.0150296	-1	887	GroupHCHWA_D	0.467161	1888	4
9.02633	-0.585302	0.000844727	NRXN1	0.0152419	-1	888	GroupHCHWA_D	0.46358	10626	4
4.91555	-0.720419	0.000845187	IL1RAPL1	0.0152419	-1	889	GroupHCHWA_D	0.430758	2679	3
7.34527	0.440955	0.000848362	LRRC8A	0.0152819	1	890	GroupHCHWA_D	0.581898	4762	8
8.79555	0.798702	0.000850411	HNRNPU	0.0153017	1	891	GroupHCHWA_D	0.417616	6846	2
4.51447	0.553629	0.000863505	SELK	0.0155199	1	892	GroupHCHWA_D	0.46577	818	4
5.19616	0.642922	0.000865402	STX16	0.0155365	1	893	GroupHCHWA_D	0.471713	4967	4
5.95766	-0.454822	0.000866924	PEX19	0.0155465	-1	894	GroupHCHWA_D	0.458436	3669	4
2.65647	0.985931	0.00087942	ELK3	0.0157445	1	895	GroupHCHWA_D	0.428538	4296	3
4.58396	0.80277	0.000879934	FRA10AC1	0.0157445	1	896	GroupHCHWA_D	0.379411	3089	1
5.92262	-0.645594	0.000882486	ARF5	0.0157726	-1	897	GroupHCHWA_D	0.607664	1096	8
2.7306	1.05893	0.000887184	MTMR11	0.0158389	1	898	GroupHCHWA_D	0.529804	3003	6
1.84972	1.6981	0.000890778	AQP9	0.0158834	1	899	GroupHCHWA_D	0.432638	3021	3
4.81019	0.770241	0.000891659	SNRNP27	0.0158834	1	900	GroupHCHWA_D	0.381085	1438	1
6.2258	-0.47472	0.000892886	ERLEC1	0.0158876	-1	901	GroupHCHWA_D	0.426801	2582	3
7.04025	-0.653299	0.000896063	STX1A	0.0159265	-1	902	GroupHCHWA_D	0.603765	2125	8
6.47789	-0.688216	0.000897946	ADAM11	0.0159423	-1	903	GroupHCHWA_D	0.614039	4402	8
5.4835	0.763946	0.000901844	FOXO4	0.0159938	1	904	GroupHCHWA_D	0.560335	3348	7
6.57429	0.403951	0.00090468	HNRNPUL1	0.0160263	1	905	GroupHCHWA_D	0.557139	4209	7
7.81713	-0.61251	0.000908174	DDX3X	0.0160581	-1	906	GroupHCHWA_D	0.426833	6738	3
4.73831	1.49427	0.000908479	MIR663A	0.0160581	1	907	GroupHCHWA_D	0.770492	183	9
0.934661	-1.00659	0.000909776	ZNF837	0.0160634	-1	908	GroupHCHWA_D	0.701426	2033	9
4.17313	-0.762716	0.000921884	SLC12A9	0.0162571	-1	909	GroupHCHWA_D	0.636389	3567	9
6.16552	1.08015	0.000922779	MAN1A1	0.0162571	1	910	GroupHCHWA_D	0.426895	5027	3
5.69454	-0.512156	0.000924023	IFT80	0.0162578	-1	911	GroupHCHWA_D	0.36081	4792	1
6.3234	-0.608289	0.000925366	HEATR5B	0.0162578	-1	912	GroupHCHWA_D	0.435773	6804	3
3.43808	0.956929	0.000925857	PHF21B	0.0162578	1	913	GroupHCHWA_D	0.60414	3961	8
3.56008	0.750783	0.000927454	ZNF354B	0.016268	1	914	GroupHCHWA_D	0.413746	2197	2
5.40507	-0.626569	0.000932525	MAGEH1	0.0163391	-1	915	GroupHCHWA_D	0.480405	1480	5
1.75452	-1.00786	0.000934328	PIGW	0.0163528	-1	916	GroupHCHWA_D	0.393792	4510	1
2.63795	1.17513	0.000935411	IL18BP	0.0163539	1	917	GroupHCHWA_D	0.543388	2904	7
4.41131	0.805977	0.000937889	LOC220729	0.0163793	1	918	GroupHCHWA_D	0.48461	1527	5
4.48361	-0.635448	0.00094228	MYO16	0.0164205	-1	919	GroupHCHWA_D	0.497076	7524	5
6.5714	0.541738	0.000942718	SNX3	0.0164205	1	920	GroupHCHWA_D	0.448864	1760	4
6.5991	1.01139	0.000943316	DUSP1	0.0164205	1	921	GroupHCHWA_D	0.551383	2024	7
8.84493	0.79942	0.000944504	FBXL16	0.0164233	1	922	GroupHCHWA_D	0.655659	3543	9
3.27234	1.79228	0.000949685	WNT7B	0.0164955	1	923	GroupHCHWA_D	0.630046	3914	9
7.95994	0.470644	0.000957561	KMT2C	0.0166089	1	924	GroupHCHWA_D	0.450184	16862	4
3.46232	0.671372	0.000958287	CASP2	0.0166089	1	925	GroupHCHWA_D	0.488634	4355	5
5.57505	1.41376	0.000961778	COL1A2	0.0166514	1	926	GroupHCHWA_D	0.547773	5411	7
6.02217	0.745803	0.000963483	ARL5A	0.0166571	1	927	GroupHCHWA_D	0.357842	3169	1
6.20443	0.491154	0.000964185	TSC22D2	0.0166571	1	928	GroupHCHWA_D	0.537015	4998	6
5.44907	0.533362	0.0009661	MAML1	0.0166716	1	929	GroupHCHWA_D	0.555303	5723	7
5.92814	-0.572102	0.000967104	NOMO1	0.0166716	-1	930	GroupHCHWA_D	0.519308	8494	6
5.9116	0.751244	0.000968871	DNMT3A	0.0166794	1	931	GroupHCHWA_D	0.551024	5664	7
3.64731	1.11781	0.000969638	HIST1H4B	0.0166794	1	932	GroupHCHWA_D	0.557423	357	7
5.41531	0.618285	0.000972458	CDK10	0.01671	1	933	GroupHCHWA_D	0.610679	1798	8
4.59772	0.827271	0.000976797	HMGN1	0.0167666	1	934	GroupHCHWA_D	0.45092	1304	4
3.48683	0.72586	0.00097843	NUTM2B-AS1	0.0167767	1	935	GroupHCHWA_D	0.40972	5206	2
2.07103	1.17586	0.000987087	PSMC3IP	0.0168894	1	936	GroupHCHWA_D	0.505051	1980	5
6.81838	0.601313	0.000987114	OLFM2	0.0168894	1	937	GroupHCHWA_D	0.620138	2314	9
8.16523	-0.541304	0.000989038	CADPS	0.0168916	-1	938	GroupHCHWA_D	0.489101	5551	5
2.8627	1.05958	0.000989346	ZNF891	0.0168916	1	939	GroupHCHWA_D	0.41815	2303	2
2.60205	-1.36142	0.000992282	PLD4	0.0169237	-1	940	GroupHCHWA_D	0.652542	2006	9
3.58696	0.732425	0.000995105	SNTB1	0.0169538	1	941	GroupHCHWA_D	0.434171	4975	3
8.43085	-0.635795	0.00099875	SCN8A	0.0169929	-1	942	GroupHCHWA_D	0.470492	11556	4
5.41449	0.523917	0.000999523	LHFP	0.0169929	1	943	GroupHCHWA_D	0.489342	2158	5
7.46983	0.676054	0.00100175	NIN	0.0170006	1	944	GroupHCHWA_D	0.41688	10936	2
1.17901	1.46969	0.00100209	STAC3	0.0170006	1	945	GroupHCHWA_D	0.561064	1654	7
9.49325	-0.492078	0.0010054	MYCBP2	0.0170146	-1	946	GroupHCHWA_D	0.441464	15025	3
6.64037	1.34014	0.00100552	ID4	0.0170146	1	947	GroupHCHWA_D	0.414861	3876	2
2.24151	1.09591	0.0010061	TMEM265	0.0170146	1	948	GroupHCHWA_D	0.481429	2100	5
6.43088	-0.715269	0.00102548	SLC25A12	0.0172975	-1	949	GroupHCHWA_D	0.430965	3998	3
6.57355	0.809305	0.00102792	SART1	0.0172975	1	950	GroupHCHWA_D	0.596223	3601	8
5.35286	0.490911	0.00102835	SAMD1	0.0172975	1	951	GroupHCHWA_D	0.69515	1299	9
3.93103	0.604452	0.00102893	RAVER1	0.0172975	1	952	GroupHCHWA_D	0.641147	3592	9
6.80154	0.897218	0.00102988	SAFB2	0.0172975	1	953	GroupHCHWA_D	0.574141	3318	7
2.95231	-0.788126	0.00102999	ADCK1	0.0172975	-1	954	GroupHCHWA_D	0.561773	2234	7
5.45911	0.593903	0.00103087	RAMP1	0.0172975	1	955	GroupHCHWA_D	0.661191	974	9
2.50042	1.53212	0.00103146	STC2	0.0172975	1	956	GroupHCHWA_D	0.516751	5343	6
1.01308	-1.21174	0.00103576	EHF	0.0173515	-1	957	GroupHCHWA_D	0.407342	5639	2
5.98578	0.52613	0.00103998	SIPA1L3	0.017404	1	958	GroupHCHWA_D	0.619465	7994	9
2.75622	1.02076	0.00104252	FOXO6	0.0174282	1	959	GroupHCHWA_D	0.705021	2390	9
4.02609	0.669819	0.0010442	DNAJC2	0.0174381	1	960	GroupHCHWA_D	0.415461	2212	2
5.68675	-0.462791	0.00104751	DIS3	0.0174753	-1	961	GroupHCHWA_D	0.40241	7634	2
6.76764	1.79996	0.00104866	GADD45B	0.0174763	1	962	GroupHCHWA_D	0.573818	1375	7
6.10519	-0.418293	0.00105086	PPP5C	0.0174947	-1	963	GroupHCHWA_D	0.59319	2232	8
5.35359	0.802843	0.0010556	SMAD7	0.0175381	1	964	GroupHCHWA_D	0.554878	3444	7
5.28512	-0.49279	0.00105565	ITGA3	0.0175381	-1	965	GroupHCHWA_D	0.612691	5027	8
2.87075	-0.915796	0.00105732	DOLK	0.0175476	-1	966	GroupHCHWA_D	0.578947	2204	8
4.0716	0.781393	0.00106042	FAM173B	0.0175664	1	967	GroupHCHWA_D	0.415711	2966	2
4.49294	1.31345	0.00106064	SERTAD1	0.0175664	1	968	GroupHCHWA_D	0.609129	1205	8
3.51914	-0.690582	0.00106348	GPANK1	0.0175871	-1	969	GroupHCHWA_D	0.570314	24490	7
5.86736	-0.413971	0.00106409	DNAJA3	0.0175871	-1	970	GroupHCHWA_D	0.543085	5524	7
2.92444	1.22339	0.00106562	CLDN15	0.0175943	1	971	GroupHCHWA_D	0.606061	2244	8
5.45892	-0.782999	0.00106696	NIPSNAP1	0.0175982	-1	972	GroupHCHWA_D	0.547406	2236	7
6.08112	-0.594192	0.00106989	PLCL2	0.0176285	-1	973	GroupHCHWA_D	0.455859	4361	4
4.28113	-0.513913	0.00107718	SCFD2	0.0177297	-1	974	GroupHCHWA_D	0.486767	3174	5
4.9726	-0.482655	0.00107825	ACAT1	0.0177297	-1	975	GroupHCHWA_D	0.420806	2134	2
2.18308	1.709	0.00107998	HGFAC	0.0177343	1	976	GroupHCHWA_D	0.670572	2134	9
3.2024	-0.672545	0.00108074	ANKRA2	0.0177343	-1	977	GroupHCHWA_D	0.411738	2198	2
6.48671	-0.562831	0.00108306	AVL9	0.0177542	-1	978	GroupHCHWA_D	0.429724	7065	3
5.95862	0.563802	0.00108424	FOXG1	0.0177553	1	979	GroupHCHWA_D	0.509046	3206	6
7.01838	-0.490717	0.00108682	DCAF8	0.0177633	-1	980	GroupHCHWA_D	0.502559	4690	5
5.76233	0.515414	0.00108694	WTAP	0.0177633	1	981	GroupHCHWA_D	0.447586	3501	3
7.15827	1.13114	0.00109273	ARGLU1	0.0178397	1	982	GroupHCHWA_D	0.47173	1751	4
5.15275	-0.382844	0.00109586	ARFRP1	0.0178552	-1	983	GroupHCHWA_D	0.638879	2675	9
8.93647	-0.56845	0.00109697	PRKACB	0.0178552	-1	984	GroupHCHWA_D	0.370493	6629	1
7.02418	-0.548606	0.00109702	MFSD6	0.0178552	-1	985	GroupHCHWA_D	0.441109	4797	3
7.68921	0.685451	0.00109817	HSPA4	0.0178559	1	986	GroupHCHWA_D	0.440177	3385	3
1.56203	1.85039	0.00109961	LOC100129697	0.0178611	1	987	GroupHCHWA_D	0.609475	1562	8
6.55567	0.634125	0.00110339	ULK1	0.0178891	1	988	GroupHCHWA_D	0.640751	5222	9
4.1332	0.761233	0.00110356	BAZ1A	0.0178891	1	989	GroupHCHWA_D	0.410073	6016	2
6.00751	-0.632232	0.00110783	OLFM3	0.0179402	-1	990	GroupHCHWA_D	0.397111	4500	2
4.60997	0.601906	0.00111093	USP28	0.0179722	1	991	GroupHCHWA_D	0.435947	4668	3
4.37808	1.9077	0.00111455	IGFBP7-AS1	0.0180126	1	992	GroupHCHWA_D	0.441325	1389	3
3.29185	-0.772937	0.00111632	ARMCX5	0.018023	-1	993	GroupHCHWA_D	0.440289	3048	3
4.88469	0.563023	0.00111991	SMG9	0.0180627	1	994	GroupHCHWA_D	0.594985	2353	8
9.20686	-0.581461	0.00112142	TRIM2	0.0180689	-1	995	GroupHCHWA_D	0.409351	7336	2
5.3747	0.589889	0.00112298	SHISA9	0.018076	1	996	GroupHCHWA_D	0.463683	9899	4
4.40595	0.60831	0.00112428	B3GALNT2	0.0180763	1	997	GroupHCHWA_D	0.424701	5611	3
3.97139	-1.16458	0.00112526	NDUFA3	0.0180763	-1	998	GroupHCHWA_D	0.615819	3540	9
5.0172	0.726605	0.00113679	RCN1	0.0182433	1	999	GroupHCHWA_D	0.465421	2516	4
4.76712	0.920991	0.00114453	SCAND2P	0.0183442	1	1000	GroupHCHWA_D	0.511422	4509	6
3.77197	0.706751	0.00114537	KCTD6	0.0183442	1	1001	GroupHCHWA_D	0.410068	1907	2
8.20852	-0.553897	0.00114869	G3BP2	0.0183576	-1	1002	GroupHCHWA_D	0.411997	4551	2
6.4557	1.15311	0.00114912	HERC2P2	0.0183576	1	1003	GroupHCHWA_D	0.495583	18223	5
14.0974	0.893839	0.00114964	RNA28S5	0.0183576	1	1004	GroupHCHWA_D	0.694045	20284	9
7.13449	-0.41707	0.00115126	DHX30	0.0183653	-1	1005	GroupHCHWA_D	0.568084	5126	7
5.52652	0.62743	0.00115531	TMED9	0.0184115	1	1006	GroupHCHWA_D	0.56425	1393	7
5.78119	0.822743	0.00115824	NFKBIA	0.0184323	1	1007	GroupHCHWA_D	0.530951	1567	6
1.52843	1.01444	0.00115952	KLRG1	0.0184323	1	1008	GroupHCHWA_D	0.404922	1788	2
6.79178	-0.490645	0.00116213	DZIP3	0.0184323	-1	1009	GroupHCHWA_D	0.399675	5542	2
2.48611	1.17883	0.00116222	TRIM5	0.0184323	1	1010	GroupHCHWA_D	0.414048	3659	2
7.80892	-0.560813	0.00116237	TPI1	0.0184323	-1	1011	GroupHCHWA_D	0.568427	1856	7
5.08928	-0.65981	0.00116637	TMEM135	0.0184686	-1	1012	GroupHCHWA_D	0.38348	9080	1
3.61546	-0.698836	0.00116696	RILP	0.0184686	-1	1013	GroupHCHWA_D	0.661083	3582	9
3.97518	0.636673	0.00116958	MOK	0.0184918	1	1014	GroupHCHWA_D	0.515176	3789	6
4.99541	0.690875	0.00117097	CBFB	0.0184956	1	1015	GroupHCHWA_D	0.40632	3133	2
4.27423	-0.7563	0.00117367	ATP5G1	0.01852	-1	1016	GroupHCHWA_D	0.552632	646	7
8.07344	-0.47888	0.00117724	EPS15	0.0185418	-1	1017	GroupHCHWA_D	0.380813	5483	1
8.81695	-0.591511	0.00117737	FAT3	0.0185418	-1	1018	GroupHCHWA_D	0.44973	19047	4
2.5276	0.819758	0.00118255	DUSP18	0.0186052	1	1019	GroupHCHWA_D	0.511829	3466	6
7.49954	0.905885	0.00118424	KLHL2	0.0186135	1	1020	GroupHCHWA_D	0.428312	3299	3
6.89026	-0.506928	0.00119018	PIN1	0.0186885	-1	1021	GroupHCHWA_D	0.644501	1173	9
3.10565	-0.659881	0.00119249	TMEM5	0.0187065	-1	1022	GroupHCHWA_D	0.459152	2289	4
1.93825	-0.899569	0.00119404	FKBPL	0.0187124	-1	1023	GroupHCHWA_D	0.55971	5376	7
3.71468	-0.618184	0.00121474	LYRM1	0.0190182	-1	1024	GroupHCHWA_D	0.498692	2294	5
5.52609	0.790858	0.0012211	STK40	0.0190992	1	1025	GroupHCHWA_D	0.588642	3909	8
6.14121	0.582536	0.00122283	AFF1	0.0191076	1	1026	GroupHCHWA_D	0.458853	9709	4
5.79384	-0.461349	0.00122409	EXOC1	0.0191087	-1	1027	GroupHCHWA_D	0.40871	3582	2
5.35387	0.598045	0.00122984	PROSC	0.0191797	1	1028	GroupHCHWA_D	0.454652	2569	4
4.91515	-0.775922	0.00123112	FAR2	0.0191797	-1	1029	GroupHCHWA_D	0.419584	4085	2
5.05688	-0.510278	0.00123223	RFX5	0.0191797	-1	1030	GroupHCHWA_D	0.492537	3618	5
7.46454	0.872459	0.0012401	FN1	0.0192665	1	1031	GroupHCHWA_D	0.495496	8993	5
2.28004	1.05388	0.00124021	EID3	0.0192665	1	1032	GroupHCHWA_D	0.448744	1473	4
6.96531	0.688914	0.00124453	FXR1	0.01931	1	1033	GroupHCHWA_D	0.371422	8909	1
6.64782	0.95576	0.00124542	CLK1	0.01931	1	1034	GroupHCHWA_D	0.40116	3794	2
6.08231	-0.449783	0.0012498	PTGES2	0.0193509	-1	1035	GroupHCHWA_D	0.653878	2424	9
3.378	-0.78537	0.00125047	KLHDC9	0.0193509	-1	1036	GroupHCHWA_D	0.596491	1368	8
3.3928	-1.51063	0.00125437	GPD1	0.0193737	-1	1037	GroupHCHWA_D	0.569575	3083	7
7.72606	-0.430562	0.00125657	ABCA3	0.0193737	-1	1038	GroupHCHWA_D	0.604862	6623	8
4.94162	0.594923	0.0012569	CLASRP	0.0193737	1	1039	GroupHCHWA_D	0.634942	2238	9
5.82625	1.0132	0.00125921	ITGB5	0.0193737	1	1040	GroupHCHWA_D	0.543275	4379	7
3.5686	-0.951872	0.00126041	RNF5	0.0193737	-1	1041	GroupHCHWA_D	0.531223	7959	6
6.6402	-0.634097	0.00126059	POLR2B	0.0193737	-1	1042	GroupHCHWA_D	0.433104	4223	3
5.5038	-0.688702	0.00126161	ABCE1	0.0193737	-1	1043	GroupHCHWA_D	0.371245	4194	1
2.88297	0.90043	0.00126161	LYAR	0.0193737	1	1044	GroupHCHWA_D	0.439875	1605	3
0.919302	-1.38728	0.0012671	DNAH17-AS1	0.0194393	-1	1045	GroupHCHWA_D	0.576796	5163	8
9.4358	1.16605	0.00127089	MEG3	0.0194667	1	1046	GroupHCHWA_D	0.476673	10567	5
5.36551	-0.656485	0.00127131	CTNNBIP1	0.0194667	-1	1047	GroupHCHWA_D	0.570952	2995	7
7.85299	-0.633635	0.00127643	ARHGEF9	0.0195264	-1	1048	GroupHCHWA_D	0.490733	5881	5
5.72062	-0.531077	0.00127926	ADSS	0.0195511	-1	1049	GroupHCHWA_D	0.420201	2782	2
6.05271	-0.484728	0.00128195	ANKRD28	0.0195736	-1	1050	GroupHCHWA_D	0.403866	6621	2
4.73148	-0.685349	0.00128511	C3orf17	0.0195769	-1	1051	GroupHCHWA_D	0.407407	4860	2
4.33829	0.839158	0.00128742	RNF144B	0.0195769	1	1052	GroupHCHWA_D	0.422558	5036	3
6.73171	0.60518	0.00128755	ACIN1	0.0195769	1	1053	GroupHCHWA_D	0.534318	5143	6
3.53848	0.659245	0.00128804	TRIM14	0.0195769	1	1054	GroupHCHWA_D	0.538495	4611	6
2.24406	-0.78869	0.00128827	ADAT2	0.0195769	-1	1055	GroupHCHWA_D	0.3925	7493	1
9.08819	-0.608395	0.00129326	ITPR1	0.0196271	-1	1056	GroupHCHWA_D	0.471197	10242	4
1.80495	1.50706	0.00129403	MB21D1	0.0196271	1	1057	GroupHCHWA_D	0.502775	1802	5
1.52134	1.18333	0.00129619	HAPLN3	0.0196302	1	1058	GroupHCHWA_D	0.607446	2122	8
3.8022	1.22257	0.00129668	KIRREL	0.0196302	1	1059	GroupHCHWA_D	0.531969	7820	6
7.57675	-0.495562	0.00130228	REPS2	0.0196963	-1	1060	GroupHCHWA_D	0.433547	7953	3
4.5106	-0.734098	0.00130556	C19orf70	0.0197273	-1	1061	GroupHCHWA_D	0.645455	1100	9
7.05088	-0.460251	0.00131085	PCMT1	0.0197886	-1	1062	GroupHCHWA_D	0.424013	1849	3
5.83537	0.62666	0.00131223	SUGT1	0.0197909	1	1063	GroupHCHWA_D	0.417133	1786	2
6.96563	-0.488525	0.00131692	CNDP2	0.0198429	-1	1064	GroupHCHWA_D	0.523384	5367	6
4.04173	0.71123	0.00132067	LIMD1	0.0198695	1	1065	GroupHCHWA_D	0.50557	6284	5
4.63917	-0.558937	0.00132116	D2HGDH	0.0198695	-1	1066	GroupHCHWA_D	0.667811	2622	9
2.82919	-0.856981	0.00132585	WARS2	0.0199123	-1	1067	GroupHCHWA_D	0.425044	2835	3
1.93094	0.98258	0.00132649	TEAD2	0.0199123	1	1068	GroupHCHWA_D	0.582904	2328	8
5.80597	0.620737	0.0013297	FERMT2	0.0199418	1	1069	GroupHCHWA_D	0.409183	3441	2
3.57278	1.0571	0.00133199	RHPN2	0.0199574	1	1070	GroupHCHWA_D	0.479184	3531	5
7.42273	-0.623874	0.0013342	CDK14	0.0199719	-1	1071	GroupHCHWA_D	0.423701	5485	3
4.39344	-0.647092	0.00133983	IMP3	0.0200219	-1	1072	GroupHCHWA_D	0.564972	1239	7
3.59059	1.01701	0.00134004	PAWR	0.0200219	1	1073	GroupHCHWA_D	0.494618	1951	5
5.0106	0.977875	0.00134885	SHISA6	0.0201265	1	1074	GroupHCHWA_D	0.5412	7415	7
7.64308	0.51456	0.00134955	IGF1R	0.0201265	1	1075	GroupHCHWA_D	0.516714	12235	6
2.2786	-0.87172	0.00135244	C1orf74	0.0201509	-1	1076	GroupHCHWA_D	0.454583	4855	4
5.00083	-0.506877	0.0013627	B3GALT6	0.0202849	-1	1077	GroupHCHWA_D	0.642192	2792	9
2.93283	1.51339	0.00136845	HMOX1	0.0203515	1	1078	GroupHCHWA_D	0.577987	1590	8
3.22352	-1.1203	0.00137369	TRPM6	0.0204006	-1	1079	GroupHCHWA_D	0.447289	8632	3
6.38852	-0.408193	0.00137429	ARFGAP1	0.0204006	-1	1080	GroupHCHWA_D	0.62913	4298	9
4.54406	1.02868	0.00137613	ID3	0.020409	1	1081	GroupHCHWA_D	0.574657	1239	7
4.07533	-0.513279	0.00137894	ZNF23	0.0204274	-1	1082	GroupHCHWA_D	0.466784	3402	4
2.87048	-0.7022	0.00137992	BPHL	0.0204274	-1	1083	GroupHCHWA_D	0.529807	2231	6
2.81162	-0.766625	0.00138604	SUV39H1	0.0204991	-1	1084	GroupHCHWA_D	0.574656	3054	7
2.13312	1.17083	0.00138907	RBPMS	0.020525	1	1085	GroupHCHWA_D	0.506678	3444	5
3.20623	0.983676	0.00139292	ARID3A	0.0205628	1	1086	GroupHCHWA_D	0.611388	2810	8
7.4926	-0.366981	0.00139471	DMXL1	0.0205703	-1	1087	GroupHCHWA_D	0.389356	12852	1
2.89483	-1.39828	0.00139624	SGK2	0.020574	-1	1088	GroupHCHWA_D	0.537241	2457	6
6.34622	0.716196	0.0014001	CFLAR	0.0206033	1	1089	GroupHCHWA_D	0.463539	15921	4
3.14283	0.74205	0.0014008	THAP1	0.0206033	1	1090	GroupHCHWA_D	0.366405	2167	1
6.64111	-0.397094	0.0014049	P4HTM	0.0206447	-1	1091	GroupHCHWA_D	0.631902	2282	9
2.97062	-0.946873	0.00140977	ADAMTS3	0.0206774	-1	1092	GroupHCHWA_D	0.414291	5822	2
7.5817	-0.496798	0.00141077	DOCK4	0.0206774	-1	1093	GroupHCHWA_D	0.43894	8336	3
4.527	0.633675	0.00141129	IPO5P1	0.0206774	1	1094	GroupHCHWA_D	0.470417	5510	4
3.68139	-0.65958	0.00141229	BBS4	0.0206774	-1	1095	GroupHCHWA_D	0.467641	2874	4
3.33651	0.846811	0.00141526	ANTXR2	0.0207021	1	1096	GroupHCHWA_D	0.412851	8233	2
8.54305	0.399881	0.00141837	PALM	0.0207286	1	1097	GroupHCHWA_D	0.673974	2874	9
8.10305	-0.455525	0.00142444	DOCK3	0.0207984	-1	1098	GroupHCHWA_D	0.503141	8755	5
6.32075	-0.647499	0.00142609	HMOX2	0.0208036	-1	1099	GroupHCHWA_D	0.57295	5634	7
2.75035	0.853046	0.00142885	LINC00997	0.0208213	1	1100	GroupHCHWA_D	0.435223	4639	3
6.30278	0.520031	0.00142991	CRAMP1L	0.0208213	1	1101	GroupHCHWA_D	0.568357	7673	7
4.28117	0.524677	0.00143191	ZNF417	0.0208316	1	1102	GroupHCHWA_D	0.441283	4709	3
3.73919	1.77988	0.00143361	COL3A1	0.0208373	1	1103	GroupHCHWA_D	0.52204	5490	6
3.7844	-1.47173	0.00143701	P2RY12	0.0208679	-1	1104	GroupHCHWA_D	0.345705	2398	1
6.17763	-0.677821	0.00144053	CDC42	0.0209001	-1	1105	GroupHCHWA_D	0.411727	3155	2
4.84977	-0.513404	0.0014446	PRMT7	0.0209402	-1	1106	GroupHCHWA_D	0.57927	3097	8
5.87863	-0.5544	0.00145475	RRM2B	0.0210682	-1	1107	GroupHCHWA_D	0.380192	5200	1
4.92636	-0.599264	0.00145932	DTD1	0.0210835	-1	1108	GroupHCHWA_D	0.523775	1367	6
6.55759	-0.381596	0.00145971	BRF1	0.0210835	-1	1109	GroupHCHWA_D	0.629293	5387	9
3.80016	-0.670318	0.0014598	SCRN2	0.0210835	-1	1110	GroupHCHWA_D	0.620502	1834	9
4.65228	0.701849	0.00146106	SNHG6	0.0210835	1	1111	GroupHCHWA_D	0.42161	472	2
4.8765	0.789011	0.00146257	LOC653513	0.0210862	1	1112	GroupHCHWA_D	0.465517	1740	4
6.98631	2.39771	0.00146474	CHI3L1	0.0210986	1	1113	GroupHCHWA_D	0.551443	1837	7
7.97926	-0.420796	0.00146621	GHITM	0.0211008	-1	1114	GroupHCHWA_D	0.416905	2449	2
5.26517	0.599073	0.00147123	KSR1	0.0211541	1	1115	GroupHCHWA_D	0.559786	4491	7
2.82163	1.46994	0.00147987	PLEKHA4	0.0212592	1	1116	GroupHCHWA_D	0.624392	3083	9
4.95583	-0.413347	0.00149022	VDAC2	0.0213888	-1	1117	GroupHCHWA_D	0.487897	2107	5
3.30615	0.815083	0.00149522	RFXAP	0.0214152	1	1118	GroupHCHWA_D	0.425841	2825	3
4.66564	1.16701	0.00149613	COL5A1	0.0214152	1	1119	GroupHCHWA_D	0.602374	8508	8
3.50744	0.672462	0.00149727	ZNF141	0.0214152	1	1120	GroupHCHWA_D	0.402558	1642	2
2.17244	1.25899	0.0014974	EVC2	0.0214152	1	1121	GroupHCHWA_D	0.551657	5130	7
1.87052	1.25046	0.00149942	ZNF788	0.0214249	1	1122	GroupHCHWA_D	0.421444	3768	2
3.69771	0.702802	0.0015032	LDLRAD3	0.0214597	1	1123	GroupHCHWA_D	0.484916	4011	5
5.27451	0.774189	0.00150866	ENGASE	0.0215185	1	1124	GroupHCHWA_D	0.612595	4494	8
5.1945	-0.460143	0.00151626	C17orf75	0.0216076	-1	1125	GroupHCHWA_D	0.421122	4583	2
5.53948	0.783861	0.00152488	DMPK	0.0217112	1	1126	GroupHCHWA_D	0.633468	3705	9
6.84013	0.455399	0.00152907	PHC3	0.0217442	1	1127	GroupHCHWA_D	0.378813	12687	1
4.8864	0.920864	0.00152991	ABCD4	0.0217442	1	1128	GroupHCHWA_D	0.510928	3157	6
5.53952	-0.772933	0.00153583	DLAT	0.021809	-1	1129	GroupHCHWA_D	0.438104	4346	3
5.36737	0.789845	0.00154099	NOM1	0.021863	1	1130	GroupHCHWA_D	0.473589	6077	4
4.04312	-0.63508	0.00154294	SULT1A1	0.0218655	-1	1131	GroupHCHWA_D	0.594812	2236	8
1.62126	-0.867684	0.00154435	LENG9	0.0218655	-1	1132	GroupHCHWA_D	0.671798	7666	9
3.80539	-0.611143	0.00154545	ZNF554	0.0218655	-1	1133	GroupHCHWA_D	0.510276	3698	6
2.91869	0.890537	0.0015477	GORAB	0.0218655	1	1134	GroupHCHWA_D	0.362323	3530	1
4.50002	1.27922	0.00154799	SPR	0.0218655	1	1135	GroupHCHWA_D	0.592186	1459	8
1.21197	-1.07732	0.00156114	EFCAB1	0.0220318	-1	1136	GroupHCHWA_D	0.456429	3764	4
7.24444	0.892142	0.0015629	YY1	0.0220373	1	1137	GroupHCHWA_D	0.523267	3159	6
5.07009	-0.448297	0.00158129	SMARCB1	0.022277	-1	1138	GroupHCHWA_D	0.584263	3406	8
5.56123	0.818364	0.001584	PLOD1	0.0222956	1	1139	GroupHCHWA_D	0.592214	3031	8
6.59731	0.557985	0.00158731	WWC1	0.0223226	1	1140	GroupHCHWA_D	0.52901	6739	6
0.973576	-1.17897	0.00160125	LST1	0.022499	-1	1141	GroupHCHWA_D	0.557047	7152	7
8.39351	0.534939	0.00161563	IRS2	0.0226623	1	1142	GroupHCHWA_D	0.613318	6998	8
0.856984	1.25039	0.0016157	ASAP1-IT1	0.0226623	1	1143	GroupHCHWA_D	0.425785	1179	3
3.72781	0.697812	0.00162276	PDRG1	0.0227413	1	1144	GroupHCHWA_D	0.546977	1373	7
3.43039	0.647632	0.0016254	CHIC2	0.0227585	1	1145	GroupHCHWA_D	0.484348	1150	5
2.62505	-0.696162	0.00162778	ZIK1	0.0227719	-1	1146	GroupHCHWA_D	0.46861	2676	4
8.01055	-0.611105	0.00163148	OXR1	0.0227843	-1	1147	GroupHCHWA_D	0.412722	5408	2
6.25751	0.996372	0.00163151	LINC01578	0.0227843	1	1148	GroupHCHWA_D	0.465356	2035	4
2.50993	1.11727	0.00163444	FANCC	0.022794	1	1149	GroupHCHWA_D	0.49075	5838	5
5.54625	0.441057	0.00163567	MAX	0.022794	1	1150	GroupHCHWA_D	0.479091	3037	5
4.04614	-0.669052	0.00163724	FEN1	0.022794	-1	1151	GroupHCHWA_D	0.537053	2294	6
5.29439	0.584393	0.00163789	ZFAND3	0.022794	1	1152	GroupHCHWA_D	0.557156	3333	7
4.9415	-0.521388	0.0016395	UQCRQ	0.0227965	-1	1153	GroupHCHWA_D	0.473817	1585	4
6.29445	0.675063	0.00164567	CHMP4B	0.0228577	1	1154	GroupHCHWA_D	0.534305	1647	6
4.18391	-0.484303	0.00164696	NDUFB3	0.0228577	-1	1155	GroupHCHWA_D	0.439024	779	3
3.74951	-0.627965	0.00164817	FPGS	0.0228577	-1	1156	GroupHCHWA_D	0.6406	2532	9
4.75738	0.654052	0.00165109	CTDNEP1	0.0228783	1	1157	GroupHCHWA_D	0.588679	1855	8
5.57888	0.638624	0.0016543	CALCOCO2	0.022903	1	1158	GroupHCHWA_D	0.440922	3817	3
5.75137	-0.512341	0.00166357	EXT2	0.0230116	-1	1159	GroupHCHWA_D	0.504933	3852	5
4.96242	-0.51233	0.00166596	XPNPEP1	0.0230247	-1	1160	GroupHCHWA_D	0.505711	2539	5
5.29708	-0.757418	0.00167542	IFIT1	0.0231245	-1	1161	GroupHCHWA_D	0.423435	4728	3
3.89737	1.22126	0.00167734	TSC22D1-AS1	0.0231245	1	1162	GroupHCHWA_D	0.442646	2842	3
0.696325	-1.10012	0.00167882	MEI1	0.0231245	-1	1163	GroupHCHWA_D	0.544933	4006	7
4.51739	-1.118	0.00167895	SLC17A6	0.0231245	-1	1164	GroupHCHWA_D	0.389342	3922	1
4.89258	-0.583791	0.00168127	ASIC2	0.0231366	-1	1165	GroupHCHWA_D	0.600562	4271	8
5.45376	-0.478051	0.00168379	MTHFD1	0.0231513	-1	1166	GroupHCHWA_D	0.49652	3448	5
5.30157	0.493969	0.00168838	TERF2	0.0231946	1	1167	GroupHCHWA_D	0.508548	2983	6
0.684033	-1.38974	0.00169078	CLEC9A	0.0232077	-1	1168	GroupHCHWA_D	0.421416	1737	2
4.17509	0.556744	0.00170835	UBE2D1	0.0234288	1	1169	GroupHCHWA_D	0.340113	2655	1
6.71099	0.767884	0.00171077	MSN	0.023442	1	1170	GroupHCHWA_D	0.503275	3970	5
2.93249	0.752395	0.0017123	RIN3	0.0234429	1	1171	GroupHCHWA_D	0.63556	3847	9
4.81189	0.638786	0.00171457	ZAK	0.0234539	1	1172	GroupHCHWA_D	0.39856	9858	2
4.3973	-0.499541	0.00171985	WDR61	0.023506	-1	1173	GroupHCHWA_D	0.489466	1424	5
5.18798	0.508189	0.00172177	ITGB1BP1	0.0235065	1	1174	GroupHCHWA_D	0.465768	1928	4
6.30044	0.731332	0.00172282	SRSF4	0.0235065	1	1175	GroupHCHWA_D	0.533202	2530	6
8.04392	-0.712884	0.00173476	NSF	0.0236477	-1	1176	GroupHCHWA_D	0.441322	11955	3
8.59577	0.55674	0.00173824	IL6ST	0.0236477	1	1177	GroupHCHWA_D	0.366553	9101	1
5.32573	-0.631154	0.00173905	TRIM27	0.0236477	-1	1178	GroupHCHWA_D	0.552848	18752	7
3.27811	0.782628	0.00173906	FAM133B	0.0236477	1	1179	GroupHCHWA_D	0.389034	2681	1
2.78104	1.20001	0.00175474	IFITM2	0.0238407	1	1180	GroupHCHWA_D	0.563014	730	7
7.99972	-0.654943	0.00175865	MOAP1	0.0238736	-1	1181	GroupHCHWA_D	0.490277	4834	5
1.97322	1.08149	0.00177467	LHX4-AS1	0.0240706	1	1182	GroupHCHWA_D	0.515995	2657	6
4.00031	0.799643	0.00178754	FGD5	0.0242136	1	1183	GroupHCHWA_D	0.544175	5897	7
3.37602	0.5687	0.00178913	HSD17B14	0.0242136	1	1184	GroupHCHWA_D	0.613581	1237	8
3.95613	-0.650643	0.00179123	MB21D2	0.0242136	-1	1185	GroupHCHWA_D	0.468072	3367	4
0.836308	-1.23364	0.00179125	PRSS54	0.0242136	-1	1186	GroupHCHWA_D	0.50884	1810	6
2.23797	1.17642	0.00180867	COX10-AS1	0.0244188	1	1187	GroupHCHWA_D	0.427469	1944	3
2.10875	1.23013	0.00180948	MRPL45P2	0.0244188	1	1188	GroupHCHWA_D	0.480659	1396	5
4.02934	-0.707716	0.00181171	TMEM18	0.0244284	-1	1189	GroupHCHWA_D	0.475518	2124	4
6.50123	0.875391	0.00182882	LRRFIP1	0.0246383	1	1190	GroupHCHWA_D	0.456966	7773	4
3.79229	-0.659368	0.00183423	GPR61	0.0246905	-1	1191	GroupHCHWA_D	0.559688	2823	7
1.81428	1.21052	0.00183713	LINC00951	0.0247088	1	1192	GroupHCHWA_D	0.49007	3122	5
7.386	0.507352	0.0018427	CLIP1	0.0247629	1	1193	GroupHCHWA_D	0.434974	5913	3
3.23579	0.70881	0.0018482	PRAF2	0.024816	1	1194	GroupHCHWA_D	0.599388	1308	8
4.70697	0.565204	0.00185101	GCSHP3	0.024833	1	1195	GroupHCHWA_D	0.41	1000	2
1.61968	1.14865	0.00185268	PCDHGB8P	0.0248346	1	1196	GroupHCHWA_D	0.521541	1973	6
4.79821	-0.533722	0.00185544	FAM69B	0.0248508	-1	1197	GroupHCHWA_D	0.610111	2334	8
9.23014	0.876128	0.00185802	HIPK2	0.0248646	1	1198	GroupHCHWA_D	0.495961	15225	5
3.35749	-0.965944	0.00186133	PRKCQ	0.0248882	-1	1199	GroupHCHWA_D	0.474581	3285	4
3.70123	0.673739	0.00186754	SGPP2	0.0249348	1	1200	GroupHCHWA_D	0.544167	1200	7
5.87725	-0.80669	0.00186794	ZNF536	0.0249348	-1	1201	GroupHCHWA_D	0.563121	4935	7
6.2709	0.702265	0.00187132	PRDM8	0.0249592	1	1202	GroupHCHWA_D	0.560559	4219	7
5.49003	-0.479562	0.00187419	SKIV2L	0.0249768	-1	1203	GroupHCHWA_D	0.591407	25020	8
1.63129	-1.32858	0.00188421	P2RY13	0.0250894	-1	1204	GroupHCHWA_D	0.392199	2769	1
5.09091	0.814508	0.00188605	KLF6	0.025093	1	1205	GroupHCHWA_D	0.459459	4662	4
4.62329	0.731842	0.00189209	UBALD2	0.0251526	1	1206	GroupHCHWA_D	0.63562	1589	9
4.81731	-0.429984	0.00190107	ATG14	0.025227	-1	1207	GroupHCHWA_D	0.445709	4743	3
1.80901	1.78533	0.00190199	TMEM56-RWDD3	0.025227	1	1208	GroupHCHWA_D	0.419745	1489	2
5.99768	0.617135	0.00190241	DDX46	0.025227	1	1209	GroupHCHWA_D	0.389677	5851	1
4.17638	0.897002	0.00190561	SETD6	0.0252485	1	1210	GroupHCHWA_D	0.488419	2979	5
4.72769	1.83614	0.00191347	SNORD17	0.0253318	1	1211	GroupHCHWA_D	0.49789	237	5
1.88741	1.31379	0.00191627	TMEM79	0.0253479	1	1212	GroupHCHWA_D	0.593033	2354	8
5.59406	-0.46097	0.00191964	PIK3R4	0.0253715	-1	1213	GroupHCHWA_D	0.439373	5039	3
1.5584	1.21847	0.00192228	TWIST1	0.0253855	1	1214	GroupHCHWA_D	0.572029	1666	7
3.30684	-0.734307	0.00193584	TTC30A	0.0255435	-1	1215	GroupHCHWA_D	0.415078	4669	2
4.0849	0.738579	0.00193773	LOC100130705	0.0255475	1	1216	GroupHCHWA_D	0.594531	3803	8
4.40773	0.883456	0.00194893	HIBCH	0.025674	1	1217	GroupHCHWA_D	0.425477	1939	3
5.4014	0.511638	0.00195111	ZCCHC6	0.0256816	1	1218	GroupHCHWA_D	0.411444	5680	2
5.47586	0.450172	0.00196476	ZNF592	0.0257974	1	1219	GroupHCHWA_D	0.519746	8179	6
5.54174	-0.832069	0.00196498	SPHKAP	0.0257974	-1	1220	GroupHCHWA_D	0.45494	6913	4
6.8441	-0.406619	0.00196644	EMC1	0.0257974	-1	1221	GroupHCHWA_D	0.468446	6671	4
5.41895	0.620712	0.00196679	FBXL14	0.0257974	1	1222	GroupHCHWA_D	0.56703	2111	7
3.01845	1.343	0.00196795	LOC102724009	0.0257974	1	1223	GroupHCHWA_D	0.513746	582	6
3.97143	0.635862	0.00197621	VASP	0.0258844	1	1224	GroupHCHWA_D	0.59345	2290	8
2.52639	1.17104	0.00198016	MNS1	0.025915	1	1225	GroupHCHWA_D	0.38606	2023	1
5.36789	0.782151	0.00199771	PPTC7	0.0261055	1	1226	GroupHCHWA_D	0.444504	3748	3
7.4108	-0.576314	0.00199797	WDR7	0.0261055	-1	1227	GroupHCHWA_D	0.441225	7282	3
2.7925	1.00915	0.00200471	SLC25A43	0.0261722	1	1228	GroupHCHWA_D	0.480346	2544	5
5.34703	-0.564893	0.00200914	GPAA1	0.0262087	-1	1229	GroupHCHWA_D	0.642961	2067	9
4.86408	0.901569	0.00202455	QRICH2	0.0263838	1	1230	GroupHCHWA_D	0.562397	5457	7
6.04129	0.51974	0.00202585	TPD52L2	0.0263838	1	1231	GroupHCHWA_D	0.536244	2428	6
4.74409	0.557151	0.00202848	GXYLT1	0.0263966	1	1232	GroupHCHWA_D	0.377003	7488	1
5.3363	0.581651	0.0020353	INTS8	0.0264638	1	1233	GroupHCHWA_D	0.41117	3563	2
5.87219	0.687607	0.00203743	DNAJB6	0.0264701	1	1234	GroupHCHWA_D	0.457367	3190	4
8.85636	0.423418	0.00204367	GNB1	0.0265131	1	1235	GroupHCHWA_D	0.506888	3194	5
4.05506	0.564029	0.00204424	CDK8	0.0265131	1	1236	GroupHCHWA_D	0.443188	1769	3
5.00091	-0.506981	0.00204605	PWP1	0.0265131	-1	1237	GroupHCHWA_D	0.447383	1853	3
4.38754	0.902461	0.00204736	XKR6	0.0265131	1	1238	GroupHCHWA_D	0.506518	3759	5
4.7513	-0.525758	0.00205645	DIABLO	0.0266094	-1	1239	GroupHCHWA_D	0.558475	3463	7
7.07001	0.481026	0.00206089	HDAC4	0.0266453	1	1240	GroupHCHWA_D	0.551025	8976	7
4.0941	1.72137	0.00206403	COL6A3	0.0266559	1	1241	GroupHCHWA_D	0.530105	10696	6
6.92177	-0.498796	0.00206598	EXTL3	0.0266559	-1	1242	GroupHCHWA_D	0.55205	6340	7
5.23627	-0.517151	0.0020667	GBAS	0.0266559	-1	1243	GroupHCHWA_D	0.411677	2004	2
2.98589	-0.577063	0.00207047	APRT	0.0266709	-1	1244	GroupHCHWA_D	0.635688	807	9
3.51941	-1.2944	0.00207119	GALNT6	0.0266709	-1	1245	GroupHCHWA_D	0.534956	4520	6
4.91388	0.513857	0.00208436	TFDP1	0.026819	1	1246	GroupHCHWA_D	0.471789	2694	4
6.72367	0.720137	0.00208953	EIF1	0.026864	1	1247	GroupHCHWA_D	0.47813	1326	5
4.30012	0.749947	0.00209736	HMG20B	0.026943	1	1248	GroupHCHWA_D	0.636364	1584	9
12.6904	0.787539	0.00210562	MALAT1	0.027015	1	1249	GroupHCHWA_D	0.402925	8751	2
2.68975	0.923032	0.00210633	SP110	0.027015	1	1250	GroupHCHWA_D	0.48085	3107	5
4.82868	-0.48727	0.00211879	ACTR6	0.027153	-1	1251	GroupHCHWA_D	0.407026	2619	2
5.3062	-0.456087	0.00212677	HIST1H4C	0.0272336	-1	1252	GroupHCHWA_D	0.523077	390	6
1.14858	1.01225	0.00213281	CTC-338M12.4	0.0272564	1	1253	GroupHCHWA_D	0.515301	1013	6
3.40574	1.1901	0.00213437	RAB39A	0.0272564	1	1254	GroupHCHWA_D	0.432723	1858	3
3.85607	0.866277	0.00213503	SIRT7	0.0272564	1	1255	GroupHCHWA_D	0.618718	1731	9
3.88631	1.04995	0.00213622	SH3BP1	0.0272564	1	1256	GroupHCHWA_D	0.640916	2576	9
3.72201	0.897364	0.00213706	TRMT13	0.0272564	1	1257	GroupHCHWA_D	0.344893	3143	1
1.60652	1.46327	0.00214055	LYZ	0.0272619	1	1258	GroupHCHWA_D	0.416887	1516	2
4.40452	0.863699	0.00214089	SPAG5	0.0272619	1	1259	GroupHCHWA_D	0.499737	3808	5
5.17903	0.578947	0.00214407	C1orf52	0.0272808	1	1260	GroupHCHWA_D	0.399115	3390	2
4.9131	-0.741466	0.00214869	KIT	0.0272876	-1	1261	GroupHCHWA_D	0.424652	5176	3
8.83956	-0.457146	0.00214961	CHL1	0.0272876	-1	1262	GroupHCHWA_D	0.402114	10502	2
4.24464	1.85895	0.00215153	GBP1	0.0272876	1	1263	GroupHCHWA_D	0.427541	3050	3
5.21976	-0.679121	0.00215257	MTCH2	0.0272876	-1	1264	GroupHCHWA_D	0.429985	2628	3
7.09463	0.556988	0.00215465	RPS20	0.0272876	1	1265	GroupHCHWA_D	0.442846	1321	3
8.12118	-0.381411	0.00215483	MADD	0.0272876	-1	1266	GroupHCHWA_D	0.549595	6412	7
5.25113	0.616158	0.00215806	NEK6	0.027307	1	1267	GroupHCHWA_D	0.550107	3263	7
5.54692	0.801024	0.00216777	ARF6	0.0274083	1	1268	GroupHCHWA_D	0.432597	3939	3
3.38415	-0.730715	0.00216949	CORO2A	0.0274084	-1	1269	GroupHCHWA_D	0.510853	5759	6
1.45956	1.52919	0.00217184	ALOXE3	0.0274165	1	1270	GroupHCHWA_D	0.580776	3454	8
3.78297	0.568947	0.0021761	CEP89	0.0274486	1	1271	GroupHCHWA_D	0.493823	2671	5
8.17893	-0.447616	0.00217786	HSPA12A	0.0274493	-1	1272	GroupHCHWA_D	0.482349	5722	5
7.49764	-0.589858	0.00218964	B4GAT1	0.0275761	-1	1273	GroupHCHWA_D	0.578744	2070	8
6.77933	-0.525172	0.00219283	UQCRC2	0.0275946	-1	1274	GroupHCHWA_D	0.439168	2211	3
3.2803	-0.619665	0.00220878	DUS2	0.0277734	-1	1275	GroupHCHWA_D	0.55871	2325	7
4.30864	0.999307	0.00221666	ITGA5	0.0278499	1	1276	GroupHCHWA_D	0.580471	4250	8
6.27921	-0.437529	0.00221833	IBTK	0.0278499	-1	1277	GroupHCHWA_D	0.372727	6050	1
3.57092	0.91998	0.00222251	LINC00673	0.0278805	1	1278	GroupHCHWA_D	0.522375	2257	6
5.49537	-0.492343	0.00222626	RXRB	0.0279058	-1	1279	GroupHCHWA_D	0.585754	18110	8
4.94202	-0.651352	0.00223701	HMGCLL1	0.0280185	-1	1280	GroupHCHWA_D	0.37473	4630	1
7.43164	-0.452577	0.0022408	ATXN7L3B	0.0280441	-1	1281	GroupHCHWA_D	0.479087	3682	5
4.21026	0.852463	0.00224601	TAF1D	0.0280766	1	1282	GroupHCHWA_D	0.390076	1310	1
3.02022	0.789585	0.0022469	MAPT-IT1	0.0280766	1	1283	GroupHCHWA_D	0.554915	9023	7
6.34917	0.500399	0.00224985	FAM65A	0.0280916	1	1284	GroupHCHWA_D	0.613616	4480	8
3.40159	-0.531526	0.00225177	NUBPL	0.0280936	-1	1285	GroupHCHWA_D	0.414928	3403	2
4.74259	-0.590308	0.0022575	C3orf18	0.0281246	-1	1286	GroupHCHWA_D	0.585426	2827	8
3.54327	0.692321	0.00225807	NATD1	0.0281246	1	1287	GroupHCHWA_D	0.593606	4786	8
3.60024	0.769365	0.00225951	AVEN	0.0281246	1	1288	GroupHCHWA_D	0.536251	1531	6
4.33573	0.737046	0.00227183	SOHLH1	0.0282451	1	1289	GroupHCHWA_D	0.639798	1985	9
3.19318	1.03949	0.00227272	LOC101926935	0.0282451	1	1290	GroupHCHWA_D	0.502388	6282	5
1.55075	1.41198	0.00227563	LSMEM1	0.0282536	1	1291	GroupHCHWA_D	0.410299	1806	2
5.16312	-0.626852	0.00227729	ADAM15	0.0282536	-1	1292	GroupHCHWA_D	0.617991	3424	9
5.07615	0.552854	0.00227869	ST5	0.0282536	1	1293	GroupHCHWA_D	0.571732	4705	7
1.15841	-0.960175	0.00228419	MBOAT1	0.0282848	-1	1294	GroupHCHWA_D	0.453219	4318	4
8.67095	0.501872	0.00228473	NSMF	0.0282848	1	1295	GroupHCHWA_D	0.648604	3654	9
4.25905	-0.584709	0.00228713	GAMT	0.0282927	-1	1296	GroupHCHWA_D	0.609897	2243	8
2.77697	0.869512	0.00229586	DLEU2	0.0283787	1	1297	GroupHCHWA_D	0.476156	2768	5
5.74964	-0.45279	0.00230173	LSM8	0.0284294	-1	1298	GroupHCHWA_D	0.345847	12520	1
5.21775	-0.414146	0.00231231	DHPS	0.0285381	-1	1299	GroupHCHWA_D	0.572828	1531	7
7.20508	0.453195	0.00231811	PPP6R1	0.0285678	1	1300	GroupHCHWA_D	0.632939	3637	9
4.99319	0.502194	0.00231828	FNBP1L	0.0285678	1	1301	GroupHCHWA_D	0.389161	5517	1
3.42649	1.50217	0.0023247	CCDC102A	0.0285877	1	1302	GroupHCHWA_D	0.662001	2429	9
5.05437	-0.408651	0.00232488	GRK6	0.0285877	-1	1303	GroupHCHWA_D	0.619405	3061	9
3.66571	-0.587995	0.00232525	DPH2	0.0285877	-1	1304	GroupHCHWA_D	0.573088	2497	7
7.31038	-0.536621	0.00232811	NIPAL3	0.0286009	-1	1305	GroupHCHWA_D	0.48544	5426	5
6.30611	-0.588928	0.0023359	BEX2	0.0286542	-1	1306	GroupHCHWA_D	0.54932	1176	7
5.86397	0.833079	0.00233675	CHSY1	0.0286542	1	1307	GroupHCHWA_D	0.497802	4550	5
5.97426	-0.677515	0.00233781	GRM3	0.0286542	-1	1308	GroupHCHWA_D	0.502817	4260	5
5.76921	0.903282	0.00234205	PAXBP1	0.0286843	1	1309	GroupHCHWA_D	0.415503	4296	2
5.26505	0.514877	0.00234429	SRSF9	0.0286898	1	1310	GroupHCHWA_D	0.521926	1163	6
3.75033	0.732252	0.00235038	C9orf40	0.0287424	1	1311	GroupHCHWA_D	0.467097	2325	4
2.86775	0.91881	0.00235459	HSD17B7	0.0287447	1	1312	GroupHCHWA_D	0.450857	1750	4
4.6824	0.759723	0.0023573	C11orf84	0.0287447	1	1313	GroupHCHWA_D	0.642296	2038	9
4.79036	-0.450677	0.00235829	WDR75	0.0287447	-1	1314	GroupHCHWA_D	0.393119	2732	1
6.58984	0.8809	0.00236299	RBBP6	0.0287447	1	1315	GroupHCHWA_D	0.434813	7256	3
2.17043	1.58483	0.00236306	TEAD4	0.0287447	1	1316	GroupHCHWA_D	0.634429	2161	9
6.12966	-0.587571	0.00236335	PFKFB2	0.0287447	-1	1317	GroupHCHWA_D	0.429071	9143	3
6.33006	-0.412777	0.00236485	NDUFA10	0.0287447	-1	1318	GroupHCHWA_D	0.474262	4915	4
1.14088	1.63507	0.00236639	RNU5B-1	0.0287447	1	1319	GroupHCHWA_D	0.393162	117	1
3.33019	1.08595	0.00236793	LOC101927572	0.0287447	1	1320	GroupHCHWA_D	0.565731	677	7
5.22634	0.659898	0.0023685	PTPN12	0.0287447	1	1321	GroupHCHWA_D	0.393085	3297	1
5.88083	-0.488301	0.002371	SLC27A4	0.0287533	-1	1322	GroupHCHWA_D	0.618586	3196	9
9.59382	-0.611414	0.00237507	CLTC	0.0287809	-1	1323	GroupHCHWA_D	0.420286	8587	2
3.48369	-0.638807	0.00238527	NCAPG2	0.0288826	-1	1324	GroupHCHWA_D	0.412231	6181	2
5.05453	-0.436339	0.00238859	ZNF780A	0.028901	-1	1325	GroupHCHWA_D	0.377781	7507	1
5.6517	0.950285	0.00239227	ARPC5L	0.0289237	1	1326	GroupHCHWA_D	0.527805	1025	6
4.53408	-0.600678	0.00240061	TBCC	0.0290027	-1	1327	GroupHCHWA_D	0.548153	1651	7
5.47728	0.535736	0.00240761	LRP10	0.0290473	1	1328	GroupHCHWA_D	0.624308	3250	9
3.39226	-0.693063	0.00241077	LNP1	0.0290473	-1	1329	GroupHCHWA_D	0.461885	2217	4
4.07552	0.619233	0.0024114	RREB1	0.0290473	1	1330	GroupHCHWA_D	0.555194	8905	7
5.65418	0.860198	0.00241298	C9orf3	0.0290473	1	1331	GroupHCHWA_D	0.476632	5178	5
6.82035	0.745398	0.00241336	HSPA4L	0.0290473	1	1332	GroupHCHWA_D	0.405199	3270	2
1.52194	1.61419	0.00242997	LINC01605	0.0292118	1	1333	GroupHCHWA_D	0.506201	2177	5
6.54067	-0.390524	0.00243068	NDUFS2	0.0292118	-1	1334	GroupHCHWA_D	0.524396	2275	6
5.72228	-0.487418	0.00243357	MMS19	0.0292241	-1	1335	GroupHCHWA_D	0.557728	3785	7
6.97931	-0.382061	0.00243534	SDHA	0.0292241	-1	1336	GroupHCHWA_D	0.532975	2790	6
6.93373	-0.410844	0.00244105	TOMM70A	0.0292628	-1	1337	GroupHCHWA_D	0.425017	4381	3
4.67399	-0.598447	0.00244221	MFSD11	0.0292628	-1	1338	GroupHCHWA_D	0.531534	3631	6
6.14292	-1.34166	0.00244926	OPALIN	0.0292658	-1	1339	GroupHCHWA_D	0.457243	4011	4
4.08196	-1.14924	0.00244963	HYAL2	0.0292658	-1	1340	GroupHCHWA_D	0.619975	2413	9
4.96952	-0.604787	0.0024503	DYSF	0.0292658	-1	1341	GroupHCHWA_D	0.5856	7278	8
4.47733	-0.643899	0.00245159	NT5DC1	0.0292658	-1	1342	GroupHCHWA_D	0.387664	3129	1
5.02259	-0.533197	0.00245192	EML1	0.0292658	-1	1343	GroupHCHWA_D	0.452212	4520	4
0.930928	1.94136	0.00245342	LOC643542	0.0292658	1	1344	GroupHCHWA_D	0.355734	2991	1
0.657401	-0.95745	0.00246311	CCR6	0.0293596	-1	1345	GroupHCHWA_D	0.435584	3687	3
5.04544	1.02689	0.00246509	WWTR1	0.0293613	1	1346	GroupHCHWA_D	0.4237	5367	3
1.84564	1.29811	0.00247872	LRRIQ1	0.0295017	1	1347	GroupHCHWA_D	0.355437	5444	1
5.60253	-0.549364	0.00248869	AMIGO1	0.0295984	-1	1348	GroupHCHWA_D	0.568596	2471	7
2.08019	-1.0575	0.00249345	PLEKHG4	0.029633	-1	1349	GroupHCHWA_D	0.619965	5089	9
6.78607	-0.703452	0.00250994	ITFG1	0.0297851	-1	1350	GroupHCHWA_D	0.401	3399	2
7.62231	-0.40203	0.00250996	ACACA	0.0297851	-1	1351	GroupHCHWA_D	0.488949	22759	5
4.49304	-0.51904	0.00252136	ATAD3A	0.0298983	-1	1352	GroupHCHWA_D	0.656929	2807	9
1.35749	1.18145	0.00252501	C8orf76	0.0299086	1	1353	GroupHCHWA_D	0.449329	1342	4
6.34552	-0.4267	0.00252612	SND1	0.0299086	-1	1354	GroupHCHWA_D	0.54675	3508	7
4.49604	-0.474565	0.00252783	ORC3	0.0299086	-1	1355	GroupHCHWA_D	0.399689	2572	2
4.84589	0.519432	0.00253139	KIAA0907	0.0299286	1	1356	GroupHCHWA_D	0.459225	2992	4
3.83044	1.21589	0.00253711	IL17RB	0.029972	1	1357	GroupHCHWA_D	0.456863	2040	4
6.777	-0.46305	0.00254004	FAM73A	0.029972	-1	1358	GroupHCHWA_D	0.362246	6410	1
8.655	-0.625931	0.00254067	DIRAS2	0.029972	-1	1359	GroupHCHWA_D	0.46352	4386	4
7.66161	0.646375	0.00255518	KTN1	0.0301088	1	1360	GroupHCHWA_D	0.391614	4913	1
5.3977	-0.956702	0.00255602	MGST3	0.0301088	-1	1361	GroupHCHWA_D	0.496706	1518	5
5.86727	1.16192	0.00256718	SLC7A5P2	0.0301911	1	1362	GroupHCHWA_D	0.573344	2536	7
7.36524	-0.471495	0.00256829	ERBB4	0.0301911	-1	1363	GroupHCHWA_D	0.389835	11923	1
6.862	0.745041	0.00256865	PLEKHO1	0.0301911	1	1364	GroupHCHWA_D	0.625223	2807	9
4.32575	-0.446175	0.00257369	COA7	0.0302281	-1	1365	GroupHCHWA_D	0.488647	2114	5
0.522519	-1.10172	0.00257975	HPDL	0.0302771	-1	1366	GroupHCHWA_D	0.610988	1802	8
5.70801	-0.548598	0.0025819	KIAA0319	0.0302802	-1	1367	GroupHCHWA_D	0.474345	7172	4
3.74672	-0.592347	0.00258514	VWA9	0.030296	-1	1368	GroupHCHWA_D	0.479986	2873	5
7.68657	-0.378257	0.00259437	MFN2	0.030382	-1	1369	GroupHCHWA_D	0.541159	4677	7
4.61888	-0.46962	0.00260737	NHLRC3	0.0304837	-1	1370	GroupHCHWA_D	0.398424	3554	2
4.31854	-0.651003	0.00260838	CYB5R1	0.0304837	-1	1371	GroupHCHWA_D	0.527693	1643	6
2.28886	1.18903	0.00260919	BTN2A2	0.0304837	1	1372	GroupHCHWA_D	0.486333	3878	5
3.32256	2.08459	0.00261425	PRKY	0.0304837	1	1373	GroupHCHWA_D	0.460995	7217	4
6.1652	-0.521694	0.00261514	DPY19L1	0.0304837	-1	1374	GroupHCHWA_D	0.387667	4865	1
5.92601	0.755464	0.00261666	KDM7A	0.0304837	1	1375	GroupHCHWA_D	0.382109	9178	1
5.20029	-1.15132	0.00261681	CDKN1C	0.0304837	-1	1376	GroupHCHWA_D	0.637306	3860	9
5.56168	0.528529	0.00261826	MLXIP	0.0304837	1	1377	GroupHCHWA_D	0.578791	8421	8
5.07719	-0.609981	0.0026224	LAMB1	0.0305096	-1	1378	GroupHCHWA_D	0.499829	5846	5
6.16485	-0.482559	0.00262656	MPP2	0.0305359	-1	1379	GroupHCHWA_D	0.580164	5626	8
6.0916	1.7102	0.00263151	CDKN1A	0.0305417	1	1380	GroupHCHWA_D	0.570724	2637	7
2.33642	-1.21093	0.00263271	PPEF1	0.0305417	-1	1381	GroupHCHWA_D	0.422702	2872	3
7.45991	0.574895	0.00263441	UBE2H	0.0305417	1	1382	GroupHCHWA_D	0.465414	5161	4
5.83786	0.495071	0.00263468	CCAR1	0.0305417	1	1383	GroupHCHWA_D	0.402185	4759	2
2.79298	-0.732038	0.00263843	SLC25A10	0.0305631	-1	1384	GroupHCHWA_D	0.658585	2021	9
4.96008	-0.554775	0.00264351	PTPDC1	0.0305998	-1	1385	GroupHCHWA_D	0.465968	4863	4
4.53549	-0.43838	0.00264985	RRAGB	0.0306511	-1	1386	GroupHCHWA_D	0.453104	2207	4
2.25069	0.904433	0.00265484	BEND7	0.0306712	1	1387	GroupHCHWA_D	0.458306	3094	4
2.64665	1.05627	0.00265649	LOXL2	0.0306712	1	1388	GroupHCHWA_D	0.575853	3810	7
4.12382	0.907052	0.00265732	FKBP11	0.0306712	1	1389	GroupHCHWA_D	0.522064	1337	6
2.91312	0.885176	0.0026598	S1PR3	0.0306777	1	1390	GroupHCHWA_D	0.497721	4388	5
4.01931	0.600934	0.00266324	HSP90B2P	0.0306907	1	1391	GroupHCHWA_D	0.406977	2752	2
1.9235	-1.07586	0.00266476	RBM43	0.0306907	-1	1392	GroupHCHWA_D	0.405468	3914	2
5.02993	-0.558406	0.00267253	DNAH7	0.0307581	-1	1393	GroupHCHWA_D	0.406648	12394	2
7.50742	-0.533556	0.00267627	FAM131B	0.030771	-1	1394	GroupHCHWA_D	0.560558	4442	7
4.76707	0.679382	0.00267789	ZNF786	0.030771	1	1395	GroupHCHWA_D	0.561812	3268	7
1.25808	1.60503	0.00267941	CTB-113P19.1	0.030771	1	1396	GroupHCHWA_D	0.507107	1970	6
8.87053	0.763694	0.00269125	MTSS1L	0.0308622	1	1397	GroupHCHWA_D	0.643761	4977	9
4.27584	-0.451872	0.00269405	AP4B1	0.0308622	-1	1398	GroupHCHWA_D	0.468238	3479	4
3.68028	1.43076	0.00269412	IRF1	0.0308622	1	1399	GroupHCHWA_D	0.530388	3554	6
4.76164	-0.848017	0.00269505	ZCCHC12	0.0308622	-1	1400	GroupHCHWA_D	0.50751	2197	6
5.35881	0.982259	0.00269893	GPR153	0.0308788	1	1401	GroupHCHWA_D	0.659481	4082	9
6.29253	-0.51944	0.00270035	SNRK	0.0308788	-1	1402	GroupHCHWA_D	0.440844	5215	3
4.44604	-0.598163	0.00270655	URM1	0.0308858	-1	1403	GroupHCHWA_D	0.551701	4410	7
6.17625	0.497312	0.00270661	G3BP1	0.0308858	1	1404	GroupHCHWA_D	0.415873	2835	2
2.46996	0.935799	0.00270802	ZNF789	0.0308858	1	1405	GroupHCHWA_D	0.454134	1766	4
6.05293	-0.582985	0.00270867	LNX1	0.0308858	-1	1406	GroupHCHWA_D	0.476177	3505	5
5.71153	-0.436479	0.00271551	TRAPPC9	0.0308934	-1	1407	GroupHCHWA_D	0.583732	4598	8
3.3465	1.49454	0.00271661	BMI1	0.0308934	1	1408	GroupHCHWA_D	0.390962	3430	1
0.988788	1.49947	0.00271716	S100A4	0.0308934	1	1409	GroupHCHWA_D	0.514184	564	6
4.1537	-0.836541	0.00271765	TM7SF2	0.0308934	-1	1410	GroupHCHWA_D	0.623985	1601	9
6.90579	-0.471874	0.00271942	ENTPD4	0.0308934	-1	1411	GroupHCHWA_D	0.459217	5897	4
6.13734	-0.398236	0.00272106	TUBGCP2	0.0308934	-1	1412	GroupHCHWA_D	0.582072	5020	8
4.84093	-0.494881	0.00272283	C12orf4	0.0308934	-1	1413	GroupHCHWA_D	0.388241	3861	1
8.26248	0.781012	0.00272707	PCNT	0.0309153	1	1414	GroupHCHWA_D	0.559754	10560	7
8.32051	0.774467	0.00272862	KIF1C	0.0309153	1	1415	GroupHCHWA_D	0.549198	7917	7
1.52502	-1.30456	0.00273597	MPEG1	0.0309767	-1	1416	GroupHCHWA_D	0.466977	4512	4
4.6695	-0.622416	0.0027575	PPP1R11	0.0311819	-1	1417	GroupHCHWA_D	0.516658	13297	6
2.12458	1.38508	0.00275899	LSP1	0.0311819	1	1418	GroupHCHWA_D	0.642654	3512	9
2.59546	1.00204	0.00275992	TACC3	0.0311819	1	1419	GroupHCHWA_D	0.579485	2837	8
5.11162	0.797577	0.00276476	DNAJB11	0.0312145	1	1420	GroupHCHWA_D	0.464222	1691	4
2.78977	1.13181	0.0027696	LOC100507412	0.0312349	1	1421	GroupHCHWA_D	0.539454	8833	6
2.25162	0.838433	0.00277081	TMEM51	0.0312349	1	1422	GroupHCHWA_D	0.562109	2238	7
2.51602	1.23764	0.00277241	ZGLP1	0.0312349	1	1423	GroupHCHWA_D	0.599495	1980	8
3.05649	0.709789	0.0027763	KPTN	0.031256	1	1424	GroupHCHWA_D	0.607524	1781	8
6.622	0.524571	0.00277818	PITPNC1	0.031256	1	1425	GroupHCHWA_D	0.435998	6367	3
4.59775	-0.439357	0.00278862	ARMC6	0.0313383	-1	1426	GroupHCHWA_D	0.619775	2488	9
3.10264	1.12593	0.00278983	ANKRD18B	0.0313383	1	1427	GroupHCHWA_D	0.37117	3753	1
8.28376	0.584504	0.00279136	SYT7	0.0313383	1	1428	GroupHCHWA_D	0.587722	6532	8
2.90719	1.2312	0.0028094	ADAM12	0.0315188	1	1429	GroupHCHWA_D	0.476446	8937	5
4.1125	0.654167	0.00281496	NOP2	0.0315265	1	1430	GroupHCHWA_D	0.550151	2981	7
7.92312	-0.616266	0.00281517	EPHA4	0.0315265	-1	1431	GroupHCHWA_D	0.452989	6658	4
3.14548	-0.71605	0.00281688	LCMT2	0.0315265	-1	1432	GroupHCHWA_D	0.523007	2847	6
0.681316	1.39771	0.00281873	C6orf118	0.0315265	1	1433	GroupHCHWA_D	0.477433	1839	5
3.91287	-0.729252	0.00281992	ZDHHC4	0.0315265	-1	1434	GroupHCHWA_D	0.52843	1618	6
3.49777	-0.604244	0.00282381	KNTC1	0.0315479	-1	1435	GroupHCHWA_D	0.402584	6965	2
4.40728	0.651035	0.00282961	CEP112	0.0315877	1	1436	GroupHCHWA_D	0.430765	4102	3
8.08929	0.927808	0.00283131	NCL	0.0315877	1	1437	GroupHCHWA_D	0.458226	2717	4
5.85967	-0.552899	0.00284441	ATP5G3	0.0317118	-1	1438	GroupHCHWA_D	0.395175	3482	2
4.12006	-0.714704	0.00285389	SULF1	0.0317779	-1	1439	GroupHCHWA_D	0.43389	6043	3
1.01436	1.47099	0.0028543	SMAD1-AS1	0.0317779	1	1440	GroupHCHWA_D	0.481481	594	5
4.75189	-0.384219	0.00287483	MRPL38	0.0319843	-1	1441	GroupHCHWA_D	0.64127	1575	9
3.65372	1.08185	0.00288827	ADAM33	0.0320946	1	1442	GroupHCHWA_D	0.631919	3559	9
4.23068	0.981552	0.00288875	TCERG1L	0.0320946	1	1443	GroupHCHWA_D	0.564005	2617	7
5.37767	-0.549484	0.00290164	GALC	0.0322092	-1	1444	GroupHCHWA_D	0.425588	4166	3
2.57976	1.42326	0.00290309	MLKL	0.0322092	1	1445	GroupHCHWA_D	0.497438	2537	5
7.22255	-0.540707	0.00290734	DGCR2	0.0322137	-1	1446	GroupHCHWA_D	0.604853	4492	8
5.4738	-0.71386	0.00290751	NDUFS7	0.0322137	-1	1447	GroupHCHWA_D	0.664122	786	9
5.67051	0.470152	0.00291097	RPL37	0.0322297	1	1448	GroupHCHWA_D	0.424204	1570	3
7.35632	0.422815	0.00291988	GOLGA4	0.0323061	1	1449	GroupHCHWA_D	0.391222	7952	1
4.54695	0.708172	0.00292697	TOB1	0.0323622	1	1450	GroupHCHWA_D	0.44162	2518	3
4.92192	-0.375614	0.00292968	ZNF687	0.0323698	-1	1451	GroupHCHWA_D	0.583484	5534	8
2.49884	1.55861	0.00293549	MGP	0.0324117	1	1452	GroupHCHWA_D	0.394433	1473	1
4.15147	1.04078	0.00293768	LINC01004	0.0324136	1	1453	GroupHCHWA_D	0.398981	9419	2
7.13532	-0.530385	0.00294497	FOCAD	0.0324411	-1	1454	GroupHCHWA_D	0.454888	6096	4
1.5355	-1.08665	0.00294562	IQGAP3	0.0324411	-1	1455	GroupHCHWA_D	0.553371	6052	7
0.822115	1.05815	0.00294625	C4orf22	0.0324411	1	1456	GroupHCHWA_D	0.426004	946	3
3.90851	0.826595	0.00295384	LONRF3	0.0325024	1	1457	GroupHCHWA_D	0.531304	4041	6
3.04366	-0.744049	0.00296528	CLTCL1	0.0326059	-1	1458	GroupHCHWA_D	0.521944	5514	6
0.669469	-1.12903	0.00296812	PRR22	0.0326147	-1	1459	GroupHCHWA_D	0.673132	1392	9
5.55766	-0.561731	0.00297218	ELP3	0.0326369	-1	1460	GroupHCHWA_D	0.473954	3321	4
1.45984	1.26476	0.00297967	MGARP	0.0326654	1	1461	GroupHCHWA_D	0.462285	1339	4
3.80802	0.778296	0.00298085	MMP14	0.0326654	1	1462	GroupHCHWA_D	0.591541	3594	8
3.92303	0.712543	0.00298088	ZNF703	0.0326654	1	1463	GroupHCHWA_D	0.651538	3349	9
8.12314	-0.478903	0.00298417	CSRNP3	0.0326791	-1	1464	GroupHCHWA_D	0.374003	12040	1
3.43926	-0.750941	0.00298989	TC2N	0.0327186	-1	1465	GroupHCHWA_D	0.36658	10718	1
6.40226	0.513067	0.00299343	SRP14	0.0327186	1	1466	GroupHCHWA_D	0.433898	1180	3
4.95395	-0.718699	0.00299715	TRIM36	0.0327186	-1	1467	GroupHCHWA_D	0.424814	5247	3
1.98059	-0.910745	0.00300087	NOSTRIN	0.0327186	-1	1468	GroupHCHWA_D	0.426179	4538	3
4.3099	0.599243	0.00300187	DOCK6	0.0327186	1	1469	GroupHCHWA_D	0.615469	6400	8
2.73236	-0.82124	0.00300511	MYADML2	0.0327186	-1	1470	GroupHCHWA_D	0.62969	2452	9
2.52946	-0.753176	0.00300523	ITGAE	0.0327186	-1	1471	GroupHCHWA_D	0.548304	3861	7
5.90274	0.601035	0.00300938	TOB2	0.0327186	1	1472	GroupHCHWA_D	0.541073	4565	7
6.36742	0.635325	0.00300989	CAPN2	0.0327186	1	1473	GroupHCHWA_D	0.503086	3727	5
6.04716	-0.407097	0.00301047	DNAJC13	0.0327186	-1	1474	GroupHCHWA_D	0.407049	7547	2
3.67071	-0.729913	0.00301133	RAC3	0.0327186	-1	1475	GroupHCHWA_D	0.660377	1060	9
5.31642	0.541264	0.00301364	ARHGAP29	0.0327186	1	1476	GroupHCHWA_D	0.385982	9117	1
3.68151	-0.758031	0.00301796	HENMT1	0.0327186	-1	1477	GroupHCHWA_D	0.480157	2041	5
6.42094	0.685434	0.00301966	RCC2	0.0327186	1	1478	GroupHCHWA_D	0.542157	4163	7
6.58761	-0.432911	0.00302034	ALDH5A1	0.0327186	-1	1479	GroupHCHWA_D	0.472147	5170	4
2.79447	1.07009	0.00302154	FAM57A	0.0327186	1	1480	GroupHCHWA_D	0.535096	2080	6
7.23629	-0.415051	0.00302376	VPS51	0.0327186	-1	1481	GroupHCHWA_D	0.653986	2760	9
6.29251	-0.732458	0.00302597	CHRNB2	0.0327186	-1	1482	GroupHCHWA_D	0.574152	5718	7
3.9185	1.06089	0.00302656	LINGO3	0.0327186	1	1483	GroupHCHWA_D	0.709859	2130	9
5.14576	0.453468	0.00303142	COLGALT1	0.0327416	1	1484	GroupHCHWA_D	0.579738	3593	8
2.69976	-0.687087	0.00303276	MTX1	0.0327416	-1	1485	GroupHCHWA_D	0.611957	2626	8
2.63376	-0.770043	0.00303994	HYLS1	0.032797	-1	1486	GroupHCHWA_D	0.488483	2518	5
4.05784	1.27296	0.00304422	NUPR1	0.032821	1	1487	GroupHCHWA_D	0.596491	912	8
3.24872	-0.651106	0.00305327	FUCA1	0.0328965	-1	1488	GroupHCHWA_D	0.492446	2118	5
6.66497	0.614577	0.00305592	MMP17	0.032903	1	1489	GroupHCHWA_D	0.687708	2408	9
5.12565	0.51896	0.0030738	NOP58	0.0330733	1	1490	GroupHCHWA_D	0.407634	1965	2
3.75317	0.97873	0.00307927	MAMLD1	0.0331098	1	1491	GroupHCHWA_D	0.543416	4860	7
4.51366	-0.65558	0.00308582	MBTPS2	0.0331411	-1	1492	GroupHCHWA_D	0.402431	4525	2
4.97452	-0.588654	0.0030863	TSNAX	0.0331411	-1	1493	GroupHCHWA_D	0.363156	2649	1
4.53321	0.539321	0.00308868	COX19	0.0331444	1	1494	GroupHCHWA_D	0.526477	4891	6
5.10729	1.15589	0.00309929	TPM2	0.0331977	1	1495	GroupHCHWA_D	0.593393	1574	8
1.69804	2.24575	0.00309974	AQP3	0.0331977	1	1496	GroupHCHWA_D	0.566007	1871	7
0.996635	1.38852	0.00309986	CCDC81	0.0331977	1	1497	GroupHCHWA_D	0.469615	2781	4
6.05347	0.412897	0.00310523	SLC41A1	0.033233	1	1498	GroupHCHWA_D	0.527805	5017	6
5.14684	0.581196	0.00311486	CACNG7	0.0333138	1	1499	GroupHCHWA_D	0.611087	2345	8
6.04267	-0.551911	0.00311833	FAM81A	0.0333287	-1	1500	GroupHCHWA_D	0.42301	3468	3
8.00797	0.478718	0.00312264	ITM2B	0.0333526	1	1501	GroupHCHWA_D	0.401371	1896	2
3.67105	0.958783	0.00312583	FOXC1	0.0333615	1	1502	GroupHCHWA_D	0.533198	3449	6
5.30865	0.53409	0.00312764	SETD1B	0.0333615	1	1503	GroupHCHWA_D	0.60903	8195	8
6.88243	0.571139	0.00313868	SERBP1	0.0334541	1	1504	GroupHCHWA_D	0.38291	6764	1
6.42305	-0.59672	0.0031405	RFPL1S	0.0334541	-1	1505	GroupHCHWA_D	0.459629	5115	4
5.67354	0.409579	0.00314265	PPP2R5E	0.0334548	1	1506	GroupHCHWA_D	0.409941	4225	2
5.86811	0.636592	0.00314959	ATP6V1G1	0.0334783	1	1507	GroupHCHWA_D	0.414649	1611	2
7.48992	-0.540144	0.00315066	SYT4	0.0334783	-1	1508	GroupHCHWA_D	0.385986	4096	1
4.38721	0.759112	0.0031517	NEB	0.0334783	1	1509	GroupHCHWA_D	0.453567	26307	4
4.3253	0.571139	0.00315321	PTPN2	0.0334783	1	1510	GroupHCHWA_D	0.412137	4103	2
3.03164	0.76796	0.0031581	CSTB	0.0335081	1	1511	GroupHCHWA_D	0.52766	940	6
1.68212	1.08079	0.0031687	ST8SIA6	0.0335982	1	1512	GroupHCHWA_D	0.448498	1398	3
3.20032	0.864597	0.00317517	DFFB	0.0336446	1	1513	GroupHCHWA_D	0.52493	3229	6
2.70249	-0.852876	0.00317915	FREM1	0.0336645	-1	1514	GroupHCHWA_D	0.444694	10225	3
6.20493	0.529237	0.00318765	KIAA1549	0.0337322	1	1515	GroupHCHWA_D	0.491189	12427	5
6.56375	0.486936	0.00319223	ZC3H11A	0.0337584	1	1516	GroupHCHWA_D	0.431352	4778	3
4.40473	-0.57761	0.00320762	C16orf13	0.0338989	-1	1517	GroupHCHWA_D	0.664256	968	9
4.82071	-0.838234	0.00322212	STAT4	0.0339622	-1	1518	GroupHCHWA_D	0.449984	3089	4
3.53855	0.824432	0.00322263	PLEKHF2	0.0339622	1	1519	GroupHCHWA_D	0.384823	2965	1
5.56442	0.671943	0.00322312	INAFM2	0.0339622	1	1520	GroupHCHWA_D	0.520677	2660	6
2.04819	1.34093	0.00322437	IKBIP	0.0339622	1	1521	GroupHCHWA_D	0.388387	4099	1
4.78549	-0.667286	0.003226	NDUFA6	0.0339622	-1	1522	GroupHCHWA_D	0.478041	4736	5
9.64954	-0.562315	0.00322637	GAS7	0.0339622	-1	1523	GroupHCHWA_D	0.523659	8876	6
4.97625	0.602593	0.00322845	KANSL1L	0.0339622	1	1524	GroupHCHWA_D	0.389838	4743	1
5.76295	0.714538	0.00323657	RYBP	0.0340024	1	1525	GroupHCHWA_D	0.374241	4449	1
0.508344	1.72535	0.00324408	TCTE3	0.0340024	1	1526	GroupHCHWA_D	0.443106	1494	3
8.76707	-0.500537	0.00324483	SLC8A1	0.0340024	-1	1527	GroupHCHWA_D	0.416079	6244	2
4.22231	0.709923	0.00324527	EFNB1	0.0340024	1	1528	GroupHCHWA_D	0.604204	3330	8
1.82854	1.6426	0.00324566	NNMT	0.0340024	1	1529	GroupHCHWA_D	0.506337	1578	5
1.12808	2.26293	0.00325644	NPC1L1	0.0340024	1	1530	GroupHCHWA_D	0.582937	5251	8
6.34865	1.49723	0.00325762	COL4A1	0.0340024	1	1531	GroupHCHWA_D	0.527636	7454	6
2.50047	-0.740183	0.00325803	KLHL35	0.0340024	-1	1532	GroupHCHWA_D	0.683695	1938	9
6.08755	-0.41395	0.0032588	PHKB	0.0340024	-1	1533	GroupHCHWA_D	0.409554	5694	2
7.06056	-0.411288	0.00325954	AP1B1	0.0340024	-1	1534	GroupHCHWA_D	0.591431	4178	8
4.5874	0.60841	0.00326316	PTPN21	0.0340024	1	1535	GroupHCHWA_D	0.489139	6215	5
5.60254	-0.4433	0.00326322	PSMD14	0.0340024	-1	1536	GroupHCHWA_D	0.44205	1717	3
5.86507	-0.459661	0.00326477	ZNF512B	0.0340024	-1	1537	GroupHCHWA_D	0.623945	5922	9
4.40839	-0.403763	0.00326674	ZNF555	0.0340024	-1	1538	GroupHCHWA_D	0.441324	8547	3
6.29678	0.520723	0.00326684	BRPF3	0.0340024	1	1539	GroupHCHWA_D	0.544911	6023	7
0.915832	-0.956073	0.0032669	PXN-AS1	0.0340024	-1	1540	GroupHCHWA_D	0.568807	763	7
6.39822	-0.420388	0.00326832	ALS2	0.0340024	-1	1541	GroupHCHWA_D	0.437358	8341	3
2.16796	0.869687	0.00327571	GGT1	0.0340572	1	1542	GroupHCHWA_D	0.614919	2976	8
9.51071	-0.654001	0.00328742	NDRG4	0.0341568	-1	1543	GroupHCHWA_D	0.591742	4311	8
3.71012	0.779376	0.00329559	PAPSS2	0.0342195	1	1544	GroupHCHWA_D	0.452825	3858	4
5.87771	-0.453693	0.00330108	NR2F1-AS1	0.0342543	-1	1545	GroupHCHWA_D	0.450059	6748	4
6.82762	0.628307	0.0033058	RPS3	0.0342811	1	1546	GroupHCHWA_D	0.443918	2746	3
4.41507	0.531848	0.00331829	RAB3D	0.0343884	1	1547	GroupHCHWA_D	0.526796	4273	6
8.39926	-0.512476	0.00333833	CAMK2B	0.0345737	-1	1548	GroupHCHWA_D	0.605579	4589	8
6.46013	0.822182	0.00334305	ZDHHC2	0.034587	1	1549	GroupHCHWA_D	0.394068	4012	1
8.95082	-0.680208	0.00334392	MEF2C	0.034587	-1	1550	GroupHCHWA_D	0.398893	6864	2
5.49315	0.556847	0.00334839	PAQR3	0.0346108	1	1551	GroupHCHWA_D	0.376571	3739	1
6.66414	-0.495349	0.00335786	SCOC	0.0346863	-1	1552	GroupHCHWA_D	0.373191	2350	1
1.74593	1.432	0.00336166	TOP1P1	0.0347032	1	1553	GroupHCHWA_D	0.365583	2429	1
1.24054	1.25849	0.00336931	LOC101929679	0.0347599	1	1554	GroupHCHWA_D	0.553877	993	7
4.89133	-0.545928	0.00338429	EPHA10	0.034892	-1	1555	GroupHCHWA_D	0.608309	6643	8
2.37022	1.54848	0.00338833	ACTRT3	0.0349111	1	1556	GroupHCHWA_D	0.490764	2003	5
6.17683	-0.402387	0.00339625	IRF2BP1	0.0349703	-1	1557	GroupHCHWA_D	0.684867	2564	9
4.22504	0.737698	0.00340984	DCUN1D3	0.0350324	1	1558	GroupHCHWA_D	0.448047	2868	3
2.89349	1.12926	0.00341177	LYVE1	0.0350324	1	1559	GroupHCHWA_D	0.4288	2500	3
5.02611	-0.618258	0.00341558	GTF2H5	0.0350324	-1	1560	GroupHCHWA_D	0.394069	7486	1
8.37517	-0.526258	0.00341578	PTPRD	0.0350324	-1	1561	GroupHCHWA_D	0.425664	10170	3
3.70047	0.818985	0.00341581	EMX2	0.0350324	1	1562	GroupHCHWA_D	0.520028	2896	6
2.68888	-0.611141	0.00341785	PEX7	0.0350324	-1	1563	GroupHCHWA_D	0.455466	1482	4
4.93225	1.23267	0.00341839	TP53I11	0.0350324	1	1564	GroupHCHWA_D	0.616518	4480	9
4.77759	0.573288	0.00341977	ING1	0.0350324	1	1565	GroupHCHWA_D	0.568349	4221	7
3.3297	0.963363	0.00343083	KMT2E-AS1	0.0351204	1	1566	GroupHCHWA_D	0.500833	3600	5
1.50434	-0.833642	0.00343274	ATG9B	0.0351204	-1	1567	GroupHCHWA_D	0.619086	4988	9
0.967928	-0.964738	0.00344739	PARPBP	0.0352463	-1	1568	GroupHCHWA_D	0.358001	3081	1
4.90958	0.804487	0.00344944	PPP1R18	0.0352463	1	1569	GroupHCHWA_D	0.612094	33307	8
3.49124	0.64467	0.0034548	ZNF844	0.0352785	1	1570	GroupHCHWA_D	0.419548	2834	2
6.63269	0.494218	0.00346328	DLG5	0.0353219	1	1571	GroupHCHWA_D	0.568525	14958	7
2.34218	1.057	0.00346582	ANP32A-IT1	0.0353219	1	1572	GroupHCHWA_D	0.485523	3281	5
5.07399	0.500664	0.00346616	ZNF587	0.0353219	1	1573	GroupHCHWA_D	0.449474	6937	4
6.09658	0.576057	0.00346786	ROCK1	0.0353219	1	1574	GroupHCHWA_D	0.407341	6648	2
1.79601	1.76883	0.0034761	LOC101927811	0.0353834	1	1575	GroupHCHWA_D	0.445545	909	3
7.43032	-0.771376	0.00347862	INPP5F	0.0353866	-1	1576	GroupHCHWA_D	0.438567	5388	3
5.46297	0.579529	0.00348494	FAM50A	0.0354284	1	1577	GroupHCHWA_D	0.599112	1352	8
5.10874	-0.672559	0.00349367	UROS	0.0354946	-1	1578	GroupHCHWA_D	0.562777	1354	7
2.57457	0.881417	0.00350762	LINC01138	0.0356138	1	1579	GroupHCHWA_D	0.474172	2052	4
3.47043	0.636446	0.00351286	RFX1	0.0356444	1	1580	GroupHCHWA_D	0.650446	4377	9
2.01414	1.0557	0.00351684	RASAL2-AS1	0.0356622	1	1581	GroupHCHWA_D	0.459367	2338	4
5.02616	-0.518896	0.00352955	RNFT2	0.0357466	-1	1582	GroupHCHWA_D	0.536232	2898	6
1.09861	-1.03186	0.00353114	ADTRP	0.0357466	-1	1583	GroupHCHWA_D	0.427341	1858	3
3.63649	0.836167	0.00353185	TNFRSF10B	0.0357466	1	1584	GroupHCHWA_D	0.500361	4151	5
7.225	0.381462	0.0035381	SCAF1	0.0357872	1	1585	GroupHCHWA_D	0.684906	4313	9
6.75993	0.598265	0.00356719	CUX2	0.0360588	1	1586	GroupHCHWA_D	0.573035	6846	7
4.04621	1.47781	0.0035705	ATF3	0.0360668	1	1587	GroupHCHWA_D	0.513949	2545	6
3.90651	-1.17167	0.00357249	KIF19	0.0360668	-1	1588	GroupHCHWA_D	0.634916	3643	9
0.895764	-1.76754	0.00357984	LOC101927641	0.0361183	-1	1589	GroupHCHWA_D	0.403666	2346	2
4.60815	0.448334	0.00358481	MED6	0.0361303	1	1590	GroupHCHWA_D	0.38845	2407	1
8.23341	-0.409198	0.00358553	HDLBP	0.0361303	-1	1591	GroupHCHWA_D	0.537713	6576	6
1.78252	1.40438	0.00358965	TCAP	0.036136	1	1592	GroupHCHWA_D	0.633437	963	9
0.894801	-1.08674	0.00359061	CDKN3	0.036136	-1	1593	GroupHCHWA_D	0.434343	891	3
8.39091	-0.460986	0.00360733	NBEA	0.0362815	-1	1594	GroupHCHWA_D	0.432828	11210	3
5.76565	0.648791	0.00361877	ZNF697	0.0363737	1	1595	GroupHCHWA_D	0.499016	5080	5
5.04805	0.588173	0.00362864	PLEKHA3	0.0364457	1	1596	GroupHCHWA_D	0.425273	2469	3
5.11302	0.52657	0.00363047	CTTNBP2NL	0.0364457	1	1597	GroupHCHWA_D	0.420339	5900	2
6.71881	0.563483	0.00363347	PTTG1IP	0.036453	1	1598	GroupHCHWA_D	0.52937	2826	6
4.63578	1.44803	0.00364166	DNAJB5	0.0365122	1	1599	GroupHCHWA_D	0.559719	2989	7
5.13812	0.862228	0.00366312	CSF1	0.0366951	1	1600	GroupHCHWA_D	0.57762	4915	8
7.3119	0.408886	0.00366544	WAC	0.0366951	1	1601	GroupHCHWA_D	0.415576	5958	2
6.30207	0.553125	0.00366676	PABPC1	0.0366951	1	1602	GroupHCHWA_D	0.461189	2860	4
2.96275	0.992273	0.00366956	IL10RB	0.0367002	1	1603	GroupHCHWA_D	0.476288	1961	5
7.63382	0.824002	0.00368195	CACNG8	0.0368012	1	1604	GroupHCHWA_D	0.561422	8751	7
6.415	-0.550611	0.00368462	TBCB	0.0368049	-1	1605	GroupHCHWA_D	0.596703	1577	8
2.7361	0.802343	0.00369443	RIPK2	0.0368719	1	1606	GroupHCHWA_D	0.425919	2585	3
5.64477	0.607347	0.00369746	LINC01000	0.0368719	1	1607	GroupHCHWA_D	0.562701	10263	7
3.94467	-0.452649	0.00369823	URB2	0.0368719	-1	1608	GroupHCHWA_D	0.49421	5613	5
4.8753	-0.675744	0.00370348	DCHS2	0.0369013	-1	1609	GroupHCHWA_D	0.47577	12010	4
5.18565	-0.415827	0.00370829	COX15	0.0369263	-1	1610	GroupHCHWA_D	0.431005	7689	3
4.0214	-0.550335	0.00371758	GCDH	0.0369279	-1	1611	GroupHCHWA_D	0.594197	2309	8
4.43178	0.577445	0.00371786	ATP7B	0.0369279	1	1612	GroupHCHWA_D	0.520482	6640	6
4.11394	-0.467669	0.0037188	CPSF3	0.0369279	-1	1613	GroupHCHWA_D	0.436478	2385	3
2.02642	1.31682	0.00372108	WNT2	0.0369279	1	1614	GroupHCHWA_D	0.49742	2907	5
5.02229	-0.747177	0.00372177	MIR4787	0.0369279	-1	1615	GroupHCHWA_D	0.797619	84	9
1.38671	1.19388	0.00372413	ALMS1P	0.0369279	1	1616	GroupHCHWA_D	0.479899	1592	5
2.47258	0.939888	0.00372523	ALS2CR12	0.0369279	1	1617	GroupHCHWA_D	0.422601	2345	3
4.03499	0.738252	0.00372807	HTATIP2	0.0369279	1	1618	GroupHCHWA_D	0.489476	2233	5
5.93597	-0.587462	0.00372919	TMEM9	0.0369279	-1	1619	GroupHCHWA_D	0.589235	2471	8
5.1774	0.557331	0.00373717	REXO4	0.0369841	1	1620	GroupHCHWA_D	0.57825	2492	8
6.37954	-0.611897	0.00373982	GPX4	0.0369875	-1	1621	GroupHCHWA_D	0.659626	1231	9
4.84138	-0.412905	0.00374935	SETDB1	0.0370413	-1	1622	GroupHCHWA_D	0.502791	4658	5
3.64969	-0.599182	0.00374988	PRC1	0.0370413	-1	1623	GroupHCHWA_D	0.475549	3190	4
2.47049	1.09942	0.00375398	SNHG12	0.037059	1	1624	GroupHCHWA_D	0.541272	739	7
4.279	0.697766	0.00376723	SRGAP1	0.0371669	1	1625	GroupHCHWA_D	0.455339	8475	4
6.78049	0.409409	0.00377823	PEAK1	0.0372349	1	1626	GroupHCHWA_D	0.451891	11817	4
8.45666	0.545552	0.00377877	CIT	0.0372349	1	1627	GroupHCHWA_D	0.515044	8708	6
5.53074	-0.429998	0.00378747	PMPCB	0.0372977	-1	1628	GroupHCHWA_D	0.387599	3919	1
4.34693	-0.413936	0.00379116	PHKG2	0.0373112	-1	1629	GroupHCHWA_D	0.537262	5515	6
1.13253	-0.963443	0.00380812	RTP1	0.0374548	-1	1630	GroupHCHWA_D	0.51917	2217	6
2.20036	1.15916	0.00381043	ITGB3	0.0374548	1	1631	GroupHCHWA_D	0.500613	4894	5
1.48019	1.23279	0.00381284	PCAT19	0.0374556	1	1632	GroupHCHWA_D	0.436108	4625	3
4.59611	0.720199	0.0038454	CREM	0.0377283	1	1633	GroupHCHWA_D	0.409122	5876	2
6.36014	0.501482	0.00384792	SMAD4	0.0377283	1	1634	GroupHCHWA_D	0.411242	8771	2
4.86357	0.423344	0.00384912	MED28	0.0377283	1	1635	GroupHCHWA_D	0.431078	2394	3
3.2711	-0.535323	0.00385262	NLRX1	0.0377283	-1	1636	GroupHCHWA_D	0.623444	4257	9
6.68466	0.692798	0.00385354	RIMBP2	0.0377283	1	1637	GroupHCHWA_D	0.498576	6322	5
4.16452	-0.475832	0.00385664	WDR24	0.0377283	-1	1638	GroupHCHWA_D	0.639951	3269	9
5.1344	-0.479764	0.00385708	WDR36	0.0377283	-1	1639	GroupHCHWA_D	0.372573	6592	1
5.57263	0.776604	0.00386647	TGM2	0.0377971	1	1640	GroupHCHWA_D	0.576358	4086	8
6.61443	-0.415516	0.00387231	ULK2	0.0378312	-1	1641	GroupHCHWA_D	0.475216	9139	4
2.93004	-1.01604	0.0038762	AGA	0.0378461	-1	1642	GroupHCHWA_D	0.412464	2102	2
1.87271	1.29327	0.0038792	GIPR	0.0378523	1	1643	GroupHCHWA_D	0.578899	3289	8
7.95223	0.490178	0.00389045	NFIX	0.0379057	1	1644	GroupHCHWA_D	0.59742	5892	8
6.61784	-0.539443	0.00389314	RPS9	0.0379057	-1	1645	GroupHCHWA_D	0.591965	7144	8
4.6445	-0.722915	0.00389337	NOMO2	0.0379057	-1	1646	GroupHCHWA_D	0.519947	12759	6
1.44818	-1.01964	0.00389413	PLK4	0.0379057	-1	1647	GroupHCHWA_D	0.392491	3995	1
5.71894	-1.04475	0.00390183	ERBB3	0.0379496	-1	1648	GroupHCHWA_D	0.516389	6193	6
7.12537	0.535938	0.00390338	HDGFRP3	0.0379496	1	1649	GroupHCHWA_D	0.4659	2434	4
5.82507	0.553973	0.00391451	CHKA	0.0380211	1	1650	GroupHCHWA_D	0.534781	2717	6
1.66648	1.12504	0.00391548	FBXL19-AS1	0.0380211	1	1651	GroupHCHWA_D	0.526196	3951	6
4.35864	-0.781303	0.00393441	ACP2	0.0381818	-1	1652	GroupHCHWA_D	0.573402	2316	7
5.04005	-0.725537	0.00394947	BEX5	0.0383048	-1	1653	GroupHCHWA_D	0.477876	1017	5
5.76479	0.837823	0.00395483	EMX2OS	0.0383337	1	1654	GroupHCHWA_D	0.495194	7282	5
7.45738	-0.770026	0.00397412	SLC39A10	0.0384825	-1	1655	GroupHCHWA_D	0.381538	5525	1
5.21695	0.524375	0.00397499	SNED1	0.0384825	1	1656	GroupHCHWA_D	0.583406	6834	8
2.4828	0.948934	0.00397849	EP400NL	0.0384932	1	1657	GroupHCHWA_D	0.549708	1539	7
5.08006	-0.435966	0.00398244	NDUFB10	0.0385081	-1	1658	GroupHCHWA_D	0.595409	697	8
7.31915	0.507715	0.00399229	CUX1	0.0385514	1	1659	GroupHCHWA_D	0.523064	15587	6
7.26402	-0.460728	0.00399722	CRMP1	0.0385514	-1	1660	GroupHCHWA_D	0.592326	4587	8
4.61377	0.569497	0.00399886	JPH1	0.0385514	1	1661	GroupHCHWA_D	0.464212	4373	4
4.32944	0.922473	0.0040003	C1R	0.0385514	1	1662	GroupHCHWA_D	0.540432	2498	7
4.54806	-0.715845	0.00400143	MCF2	0.0385514	-1	1663	GroupHCHWA_D	0.383872	4241	1
5.78727	-0.390971	0.0040072	MICU1	0.0385514	-1	1664	GroupHCHWA_D	0.473448	2674	4
7.89938	0.525296	0.00401263	SPECC1	0.0385514	1	1665	GroupHCHWA_D	0.47873	6864	5
2.27123	0.817487	0.00401413	SLC43A1	0.0385514	1	1666	GroupHCHWA_D	0.585449	2639	8
2.58028	0.764231	0.00401582	WDR66	0.0385514	1	1667	GroupHCHWA_D	0.475669	4295	4
3.40481	1.10108	0.00401593	NKD2	0.0385514	1	1668	GroupHCHWA_D	0.66715	4140	9
5.41781	-0.53312	0.00401651	WDR11	0.0385514	-1	1669	GroupHCHWA_D	0.443599	4734	3
7.14414	-0.487853	0.00401661	RHOBTB2	0.0385514	-1	1670	GroupHCHWA_D	0.58973	5823	8
7.68244	0.599203	0.00402283	LRIG1	0.0385514	1	1671	GroupHCHWA_D	0.5231	4762	6
6.13737	0.664443	0.00402375	DEK	0.0385514	1	1672	GroupHCHWA_D	0.373737	2871	1
6.6618	0.588785	0.00402505	SHANK2	0.0385514	1	1673	GroupHCHWA_D	0.517763	10837	6
2.47968	0.848423	0.00402936	CHRAC1	0.0385514	1	1674	GroupHCHWA_D	0.445447	2548	3
5.4233	-0.493792	0.00403099	BCAS3	0.0385514	-1	1675	GroupHCHWA_D	0.514824	3609	6
6.82177	-0.435933	0.00403142	ISCU	0.0385514	-1	1676	GroupHCHWA_D	0.474492	2411	4
4.31128	0.569895	0.00403812	TRMT44	0.0385514	1	1677	GroupHCHWA_D	0.553057	2846	7
4.40523	-0.558369	0.00403834	CYB5D2	0.0385514	-1	1678	GroupHCHWA_D	0.555944	2002	7
1.48714	-0.958269	0.00403933	HYAL1	0.0385514	-1	1679	GroupHCHWA_D	0.583051	2950	8
4.50695	0.540665	0.00403982	LRCH1	0.0385514	1	1680	GroupHCHWA_D	0.432319	8082	3
5.80521	-0.554298	0.00404334	ORC4	0.038562	-1	1681	GroupHCHWA_D	0.388123	7039	1
4.71237	-0.52205	0.00406456	AGK	0.0387414	-1	1682	GroupHCHWA_D	0.439427	5093	3
5.86606	1.71113	0.00407146	PABPN1	0.0387612	1	1683	GroupHCHWA_D	0.542231	3102	7
4.53302	0.436837	0.00407148	TRIM25	0.0387612	1	1684	GroupHCHWA_D	0.511142	5744	6
6.69331	1.61734	0.00408428	SV2C	0.0388601	1	1685	GroupHCHWA_D	0.446522	11603	3
6.88166	-0.4218	0.00410254	DSTYK	0.0390106	-1	1686	GroupHCHWA_D	0.468707	7909	4
1.51682	1.43891	0.0041057	FAM83G	0.0390175	1	1687	GroupHCHWA_D	0.64471	2930	9
4.19185	0.59753	0.00410964	PM20D2	0.0390319	1	1688	GroupHCHWA_D	0.399661	4714	2
6.71405	-0.363875	0.00412106	STK25	0.0391172	-1	1689	GroupHCHWA_D	0.622314	3164	9
5.41349	0.754816	0.00413361	CNTFR	0.0392131	1	1690	GroupHCHWA_D	0.627191	2111	9
4.57891	0.506761	0.00414527	DNAAF5	0.0392809	1	1691	GroupHCHWA_D	0.600469	3414	8
2.35602	0.910427	0.00414566	MZF1-AS1	0.0392809	1	1692	GroupHCHWA_D	0.559094	2606	7
1.8022	-0.725361	0.00415474	OTUB2	0.0393436	-1	1693	GroupHCHWA_D	0.511232	7746	6
3.43768	0.827459	0.00415862	SHKBP1	0.0393467	1	1694	GroupHCHWA_D	0.623679	2365	9
4.20211	0.50176	0.00415997	NUCB2	0.0393467	1	1695	GroupHCHWA_D	0.390199	1612	1
2.66932	-0.678506	0.00416848	DDX28	0.0393884	-1	1696	GroupHCHWA_D	0.571704	2594	7
1.50512	0.963053	0.00416929	LOC105372795	0.0393884	1	1697	GroupHCHWA_D	0.397661	1026	2
8.31578	-0.43708	0.00417465	PIP4K2B	0.0394098	-1	1698	GroupHCHWA_D	0.533147	11464	6
4.66751	-0.47183	0.00417647	STX3	0.0394098	-1	1699	GroupHCHWA_D	0.461004	6475	4
3.17842	0.93352	0.00418255	TAPT1-AS1	0.0394439	1	1700	GroupHCHWA_D	0.514331	2547	6
2.31808	-0.758465	0.00418856	ZNF658	0.0394773	-1	1701	GroupHCHWA_D	0.408199	4025	2
2.36312	0.900664	0.00420501	SNHG10	0.0396003	1	1702	GroupHCHWA_D	0.500765	1961	5
4.84487	0.584014	0.00420654	POLR1D	0.0396003	1	1703	GroupHCHWA_D	0.47649	3020	5
2.29935	-0.692206	0.00420923	GTF2IP1	0.0396023	-1	1704	GroupHCHWA_D	0.470515	7258	4
4.37703	-0.828228	0.00421301	RAB37	0.0396146	-1	1705	GroupHCHWA_D	0.57924	3603	8
2.92936	0.805434	0.00423048	NKX2-2	0.0397298	1	1706	GroupHCHWA_D	0.573077	2080	7
5.1259	-0.389721	0.00423403	FAM69A	0.0397298	-1	1707	GroupHCHWA_D	0.394966	3099	2
5.37832	0.483304	0.00423508	TRAM1	0.0397298	1	1708	GroupHCHWA_D	0.373669	3099	1
6.05813	0.477322	0.00423517	ELMSAN1	0.0397298	1	1709	GroupHCHWA_D	0.567882	8257	7
3.58207	0.534868	0.00423901	GABPB1	0.0397426	1	1710	GroupHCHWA_D	0.398897	3264	2
5.93352	0.509433	0.00425293	ZFC3H1	0.0398442	1	1711	GroupHCHWA_D	0.411962	7156	2
6.45422	0.40921	0.00425482	ADARB1	0.0398442	1	1712	GroupHCHWA_D	0.53254	7145	6
4.88138	-0.435582	0.0042608	MCTS1	0.0398769	-1	1713	GroupHCHWA_D	0.378538	9962	1
5.34336	-0.657178	0.00426639	SMIM10L2B	0.0398854	-1	1714	GroupHCHWA_D	0.615028	2808	8
7.09851	-0.431942	0.00426669	DCAF6	0.0398854	-1	1715	GroupHCHWA_D	0.449544	3617	4
1.31274	1.44623	0.00427805	FLJ46906	0.0399684	1	1716	GroupHCHWA_D	0.517483	1001	6
3.06336	0.671897	0.00429633	LINC01278	0.0401158	1	1717	GroupHCHWA_D	0.488219	2886	5
6.55285	0.368537	0.00429921	IFNAR1	0.0401193	1	1718	GroupHCHWA_D	0.423531	6094	3
2.52586	-0.861676	0.00430676	GNA15	0.0401664	-1	1719	GroupHCHWA_D	0.626853	2294	9
6.91822	0.933041	0.00431961	RBM25	0.0402627	1	1720	GroupHCHWA_D	0.409714	4303	2
4.36021	-0.489574	0.00432917	EPM2A	0.0403285	-1	1721	GroupHCHWA_D	0.476479	3465	5
6.55016	0.727142	0.00433343	SREK1	0.0403447	1	1722	GroupHCHWA_D	0.36554	8932	1
6.23103	-0.729982	0.00433729	ROBO2	0.0403537	-1	1723	GroupHCHWA_D	0.417221	9024	2
5.35785	-0.546712	0.00433944	DDOST	0.0403537	-1	1724	GroupHCHWA_D	0.540922	2126	7
6.17425	-0.596286	0.00436295	ATAD1	0.0405099	-1	1725	GroupHCHWA_D	0.389255	3034	1
2.82933	0.758063	0.00436605	ZSCAN22	0.0405099	1	1726	GroupHCHWA_D	0.532845	4643	6
3.14428	0.640702	0.00436718	PBX3	0.0405099	1	1727	GroupHCHWA_D	0.463918	3104	4
5.95984	-0.564303	0.00436881	SMIM10L2A	0.0405099	-1	1728	GroupHCHWA_D	0.618634	3456	9
3.25585	0.890528	0.00436887	UNC13D	0.0405099	1	1729	GroupHCHWA_D	0.632969	4392	9
6.03823	0.706364	0.00437409	CEBPB	0.0405349	1	1730	GroupHCHWA_D	0.673305	2109	9
4.78536	0.621466	0.00438044	TMX1	0.0405544	1	1731	GroupHCHWA_D	0.346819	4103	1
5.97523	0.40378	0.00438126	UBE2R2	0.0405544	1	1732	GroupHCHWA_D	0.490913	4457	5
7.35886	0.535866	0.00438846	FYN	0.0405781	1	1733	GroupHCHWA_D	0.485036	3876	5
1.67641	-0.981328	0.00438887	CIDEA	0.0405781	-1	1734	GroupHCHWA_D	0.624606	1585	9
4.51984	0.699145	0.00439331	GRK5	0.0405957	1	1735	GroupHCHWA_D	0.536747	2558	6
4.85792	0.46835	0.00439997	CNOT4	0.0406234	1	1736	GroupHCHWA_D	0.402747	5388	2
3.89007	0.570171	0.00440138	ISG20L2	0.0406234	1	1737	GroupHCHWA_D	0.498347	2723	5
7.65305	-0.381363	0.00440566	KIAA0368	0.0406396	-1	1738	GroupHCHWA_D	0.454201	7391	4
7.30143	0.729341	0.00440991	MCL1	0.0406554	1	1739	GroupHCHWA_D	0.45459	4085	4
5.84312	0.433487	0.00441772	RAB21	0.0407039	1	1740	GroupHCHWA_D	0.426722	2627	3
1.32793	-1.05473	0.00443213	RASL11A	0.0408133	-1	1741	GroupHCHWA_D	0.570966	1543	7
7.03849	0.398433	0.0044398	BAIAP2	0.0408605	1	1742	GroupHCHWA_D	0.60486	4897	8
5.88239	-1.18055	0.00444843	GLDN	0.0408841	-1	1743	GroupHCHWA_D	0.45721	5083	4
4.09646	0.608282	0.00445247	CCPG1	0.0408841	1	1744	GroupHCHWA_D	0.397065	7223	2
4.35355	-0.630371	0.00445252	APH1B	0.0408841	-1	1745	GroupHCHWA_D	0.424756	4193	3
4.82444	0.595551	0.00445258	ZNF493	0.0408841	1	1746	GroupHCHWA_D	0.351528	6284	1
5.50421	-0.657566	0.00445926	ACADSB	0.0409221	-1	1747	GroupHCHWA_D	0.39421	5941	1
2.67892	0.789623	0.00447213	FAM196A	0.0410167	1	1748	GroupHCHWA_D	0.454731	4407	4
3.85664	-0.620361	0.00447478	PFDN6	0.0410175	-1	1749	GroupHCHWA_D	0.548431	3665	7
8.20368	-0.453779	0.00448227	APBA2	0.0410555	-1	1750	GroupHCHWA_D	0.580242	7278	8
7.31644	0.576014	0.00448407	MYO9B	0.0410555	1	1751	GroupHCHWA_D	0.603831	7623	8
8.46396	0.514644	0.00448661	SHANK3	0.0410555	1	1752	GroupHCHWA_D	0.665155	7054	9
1.49571	1.17783	0.00449127	CMTM1	0.0410748	1	1753	GroupHCHWA_D	0.55814	1118	7
5.37721	0.831552	0.00449451	CNIH2	0.0410809	1	1754	GroupHCHWA_D	0.65123	1382	9
1.82111	1.14958	0.00450508	NPIPB3	0.0411541	1	1755	GroupHCHWA_D	0.544751	3620	7
3.76499	-1.06539	0.00450983	ENPP6	0.041174	-1	1756	GroupHCHWA_D	0.466209	3936	4
5.55603	-0.443998	0.00452572	LRRC14	0.0412776	-1	1757	GroupHCHWA_D	0.642805	5434	9
4.28017	-0.456566	0.00452822	METTL8	0.0412776	-1	1758	GroupHCHWA_D	0.418736	8134	2
7.93515	0.507041	0.0045289	ADGRB1	0.0412776	1	1759	GroupHCHWA_D	0.672576	5528	9
3.806	0.6045	0.00454165	LRRC37B	0.0413703	1	1760	GroupHCHWA_D	0.468956	3028	4
7.725	-0.429693	0.004557	KLHDC3	0.0414554	-1	1761	GroupHCHWA_D	0.568598	2019	7
4.14458	0.821669	0.00455845	SNAPC2	0.0414554	1	1762	GroupHCHWA_D	0.639218	1688	9
9.42073	-0.625307	0.00455875	CHN1	0.0414554	-1	1763	GroupHCHWA_D	0.457402	3310	4
6.79707	0.697951	0.00457208	INPP5A	0.0415517	1	1764	GroupHCHWA_D	0.528931	2938	6
5.39633	-0.396205	0.00457452	TRPC1	0.0415517	-1	1765	GroupHCHWA_D	0.366427	4170	1
7.93894	-0.345008	0.0045832	GLG1	0.0416069	-1	1766	GroupHCHWA_D	0.503073	9438	5
4.33898	-0.409589	0.00459688	EIF2B3	0.0416867	-1	1767	GroupHCHWA_D	0.478401	2176	5
6.41724	0.692953	0.00459762	HSPB8	0.0416867	1	1768	GroupHCHWA_D	0.525974	2002	6
9.07437	-0.538335	0.00459978	PNMA2	0.0416867	-1	1769	GroupHCHWA_D	0.465745	4846	4
2.57063	0.8087	0.00460335	LOC100506730	0.0416955	1	1770	GroupHCHWA_D	0.433735	2490	3
2.16615	0.985812	0.00461203	GPR35	0.0417504	1	1771	GroupHCHWA_D	0.617103	2596	9
3.94157	-0.503884	0.00462604	NIT1	0.0418537	-1	1772	GroupHCHWA_D	0.521902	3196	6
4.8799	-0.667185	0.00463286	SEMA3C	0.0418767	-1	1773	GroupHCHWA_D	0.393506	5174	1
2.39384	-1.19382	0.00463382	CYB5R2	0.0418767	-1	1774	GroupHCHWA_D	0.588471	1995	8
4.01024	1.1114	0.00464295	ANXA1	0.0419356	1	1775	GroupHCHWA_D	0.408854	1536	2
6.77334	0.707376	0.00465181	C16orf72	0.041992	1	1776	GroupHCHWA_D	0.439809	3979	3
4.93673	0.408155	0.00467561	SLAIN2	0.0421831	1	1777	GroupHCHWA_D	0.38729	6011	1
6.12326	-0.542702	0.00468118	ATP5F1	0.042193	-1	1778	GroupHCHWA_D	0.454545	2101	4
5.57857	0.455674	0.00468198	RPL14	0.042193	1	1779	GroupHCHWA_D	0.502066	968	5
1.34335	1.19945	0.00468591	DSCAM-IT1	0.0421942	1	1780	GroupHCHWA_D	0.459722	720	4
3.33613	-0.858821	0.00468736	OPRK1	0.0421942	-1	1781	GroupHCHWA_D	0.45612	5196	4
5.9092	0.376359	0.00470374	CBFA2T2	0.0423178	1	1782	GroupHCHWA_D	0.507642	7917	6
7.16099	-0.409142	0.00470848	NBAS	0.0423367	-1	1783	GroupHCHWA_D	0.460548	7300	4
7.63595	-0.414426	0.00471267	SLC4A8	0.0423506	-1	1784	GroupHCHWA_D	0.465536	13202	4
5.37244	-0.443495	0.004717	PIGQ	0.0423658	-1	1785	GroupHCHWA_D	0.665662	2985	9
4.75382	0.570973	0.00472174	CHERP	0.0423846	1	1786	GroupHCHWA_D	0.60928	4095	8
4.54609	0.726978	0.00472562	PTCHD2	0.0423957	1	1787	GroupHCHWA_D	0.627158	5214	9
2.15927	0.792517	0.00473045	LSM12	0.0424153	1	1788	GroupHCHWA_D	0.450886	2484	4
5.34664	0.982796	0.00473773	CROCCP2	0.0424568	1	1789	GroupHCHWA_D	0.559773	1765	7
5.42872	-0.488174	0.00474459	ICA1	0.0424946	-1	1790	GroupHCHWA_D	0.49795	2683	5
5.3566	0.436538	0.00474885	CDC25B	0.042509	1	1791	GroupHCHWA_D	0.599068	4290	8
9.52838	0.742553	0.0047611	AKAP12	0.0425608	1	1792	GroupHCHWA_D	0.470367	8791	4
6.20186	-0.433294	0.00476239	VPS8	0.0425608	-1	1793	GroupHCHWA_D	0.431345	5047	3
6.33779	0.378878	0.0047626	C5orf24	0.0425608	1	1794	GroupHCHWA_D	0.366077	5141	1
3.6175	-0.637883	0.00477876	CLCN5	0.0426226	-1	1795	GroupHCHWA_D	0.430211	10632	3
7.23689	-0.426098	0.0047818	OBSL1	0.0426226	-1	1796	GroupHCHWA_D	0.639863	7275	9
7.46673	-0.372074	0.00478353	NCAM2	0.0426226	-1	1797	GroupHCHWA_D	0.389644	5002	1
6.50252	-0.477022	0.00478668	PPIA	0.0426226	-1	1798	GroupHCHWA_D	0.46135	2445	4
2.91948	-0.791678	0.00478696	TRAM1L1	0.0426226	-1	1799	GroupHCHWA_D	0.407499	2027	2
2.58818	0.955064	0.00479064	FAR2P2	0.0426226	1	1800	GroupHCHWA_D	0.474624	2857	4
3.03425	0.616808	0.0047936	SLC16A10	0.0426226	1	1801	GroupHCHWA_D	0.465929	2891	4
4.53749	0.491963	0.00479371	MIER2	0.0426226	1	1802	GroupHCHWA_D	0.639392	2762	9
9.40238	0.60964	0.00479467	MPRIP	0.0426226	1	1803	GroupHCHWA_D	0.512746	11023	6
9.87539	-0.42852	0.00479611	PKM	0.0426226	-1	1804	GroupHCHWA_D	0.582207	3181	8
6.28448	0.341616	0.00480243	RC3H1	0.0426552	1	1805	GroupHCHWA_D	0.380807	11129	1
3.04576	-0.661267	0.00480625	ZNF624	0.0426557	-1	1806	GroupHCHWA_D	0.367342	4244	1
1.55678	1.26001	0.00480781	LOC105447645	0.0426557	1	1807	GroupHCHWA_D	0.534668	1399	6
5.56304	0.456829	0.00481344	SOCS4	0.042682	1	1808	GroupHCHWA_D	0.359384	7012	1
5.87649	0.548269	0.00482233	ZYX	0.0427162	1	1809	GroupHCHWA_D	0.640937	2306	9
3.11543	-0.563745	0.00482525	PPOX	0.0427162	-1	1810	GroupHCHWA_D	0.591629	1768	8
0.754759	-0.915216	0.00482529	P2RX5	0.0427162	-1	1811	GroupHCHWA_D	0.581889	2308	8
5.83188	-0.515962	0.00482862	ATP5H	0.0427221	-1	1812	GroupHCHWA_D	0.451768	622	4
3.20734	0.907742	0.00483527	LOC642776	0.0427574	1	1813	GroupHCHWA_D	0.444074	2101	3
1.11268	-0.969007	0.0048522	FAM163A	0.0428834	-1	1814	GroupHCHWA_D	0.583362	2909	8
2.82138	1.98582	0.00489133	MUC6	0.0431919	1	1815	GroupHCHWA_D	0.615769	24009	9
3.95377	-0.507376	0.00489337	PPCS	0.0431919	-1	1816	GroupHCHWA_D	0.45919	3112	4
7.38637	0.537876	0.00489519	HP1BP3	0.0431919	1	1817	GroupHCHWA_D	0.429737	3921	3
3.03982	-0.561985	0.0048988	WIBG	0.0431999	-1	1818	GroupHCHWA_D	0.55721	1276	7
5.12797	0.773646	0.00490882	FOXJ2	0.0432435	1	1819	GroupHCHWA_D	0.510215	5482	6
2.36829	1.1336	0.00490913	PRR16	0.0432435	1	1820	GroupHCHWA_D	0.46743	2272	4
4.50081	-0.635732	0.00491734	NXPH3	0.0432743	-1	1821	GroupHCHWA_D	0.590598	5552	8
4.7734	-0.407852	0.00491803	TRMT2A	0.0432743	-1	1822	GroupHCHWA_D	0.632954	2986	9
5.07377	-0.444496	0.00492647	STOML2	0.0433128	-1	1823	GroupHCHWA_D	0.550664	1431	7
3.72865	1.51237	0.00493011	GPR68	0.0433128	1	1824	GroupHCHWA_D	0.60542	3026	8
3.60662	0.827806	0.0049305	SHE	0.0433128	1	1825	GroupHCHWA_D	0.450914	6183	4
3.66299	0.697419	0.00493503	LATS2	0.0433288	1	1826	GroupHCHWA_D	0.51759	5543	6
8.77208	-0.367991	0.00497232	MEGF8	0.0436323	-1	1827	GroupHCHWA_D	0.636697	11167	9
4.78502	1.13894	0.00497534	IGFBP3	0.0436349	1	1828	GroupHCHWA_D	0.513493	2631	6
4.44518	0.7793	0.00497974	ARX	0.0436496	1	1829	GroupHCHWA_D	0.628045	2874	9
6.68617	0.534798	0.00498418	KCNC1	0.0436632	1	1830	GroupHCHWA_D	0.566818	8366	7
6.72185	0.598765	0.00498908	SAMD4A	0.0436632	1	1831	GroupHCHWA_D	0.477663	7051	5
2.11714	0.96027	0.00499202	CDC6	0.0436632	1	1832	GroupHCHWA_D	0.444153	3053	3
1.2689	-0.852141	0.00499218	MIR4500HG	0.0436632	-1	1833	GroupHCHWA_D	0.382687	1675	1
5.70841	0.445139	0.00499492	TAPT1	0.0436633	1	1834	GroupHCHWA_D	0.401482	4588	2
1.61193	-1.30193	0.00500077	MX2	0.0436906	-1	1835	GroupHCHWA_D	0.498143	2961	5
3.91037	0.616859	0.00501545	GABPB2	0.043795	1	1836	GroupHCHWA_D	0.473118	1953	4
4.42547	0.477353	0.00501885	ZNF579	0.0438009	1	1837	GroupHCHWA_D	0.720018	2168	9
6.70279	-0.378742	0.00503624	TECPR2	0.0438934	-1	1838	GroupHCHWA_D	0.540582	9068	7
7.22556	1.0772	0.00503739	METTL7A	0.0438934	1	1839	GroupHCHWA_D	0.441003	3390	3
7.45872	-0.388442	0.00503767	PFKL	0.0438934	-1	1840	GroupHCHWA_D	0.638042	3412	9
6.64117	-0.793832	0.00505176	LY6H	0.0439923	-1	1841	GroupHCHWA_D	0.66465	2314	9
4.19555	-0.484686	0.00506135	MIEF2	0.0440519	-1	1842	GroupHCHWA_D	0.617391	2645	9
8.96061	-0.506864	0.00507157	SLC12A5	0.0441169	-1	1843	GroupHCHWA_D	0.585358	6256	8
3.75397	-0.484892	0.0050906	B4GALT7	0.0442584	-1	1844	GroupHCHWA_D	0.620151	1727	9
3.47522	-0.513522	0.00509565	RANBP17	0.0442783	-1	1845	GroupHCHWA_D	0.43007	4576	3
5.5501	0.604751	0.00511663	ZNF680	0.0444086	1	1846	GroupHCHWA_D	0.321458	4912	1
3.63784	0.96317	0.00512038	LTBP2	0.0444086	1	1847	GroupHCHWA_D	0.57213	8554	7
7.13735	-0.470293	0.00512106	PTPRK	0.0444086	-1	1848	GroupHCHWA_D	0.431116	13138	3
4.82276	0.4504	0.00512173	ZSCAN26	0.0444086	1	1849	GroupHCHWA_D	0.44884	2932	4
1.86469	-1.02353	0.00512916	PHOSPHO1	0.044449	-1	1850	GroupHCHWA_D	0.64243	2173	9
4.88776	0.411892	0.00513632	CHTOP	0.0444871	1	1851	GroupHCHWA_D	0.501385	2166	5
4.66393	0.67229	0.00514836	EMILIN1	0.0445103	1	1852	GroupHCHWA_D	0.677772	3932	9
1.11699	-0.946985	0.00514941	TDO2	0.0445103	-1	1853	GroupHCHWA_D	0.382854	3406	1
6.62915	-0.47458	0.00515004	DDX1	0.0445103	-1	1854	GroupHCHWA_D	0.44181	2741	3
4.74622	-0.417317	0.00515011	PMS2	0.0445103	-1	1855	GroupHCHWA_D	0.461213	2836	4
5.29729	0.696793	0.00516495	ERRFI1	0.0446145	1	1856	GroupHCHWA_D	0.43752	3129	3
1.64461	1.89651	0.00517532	CXCL2	0.0446495	1	1857	GroupHCHWA_D	0.458853	1203	4
4.58395	-0.665895	0.00517708	HERC6	0.0446495	-1	1858	GroupHCHWA_D	0.459244	3889	4
5.03628	0.507426	0.00517736	NXF1	0.0446495	1	1859	GroupHCHWA_D	0.53822	4147	6
5.61126	0.492003	0.0051937	TMEM57	0.0447663	1	1860	GroupHCHWA_D	0.433995	3977	3
2.89979	-0.74226	0.0051998	RBM11	0.0447949	-1	1861	GroupHCHWA_D	0.35638	1967	1
2.6339	1.6188	0.0052247	CRABP2	0.0449625	1	1862	GroupHCHWA_D	0.561856	1164	7
2.34213	1.25615	0.00522487	KLHL6	0.0449625	1	1863	GroupHCHWA_D	0.474525	6320	4
4.17385	1.20914	0.00523223	CP	0.0449739	1	1864	GroupHCHWA_D	0.389876	5235	1
7.41221	-1.42619	0.00523385	CARNS1	0.0449739	-1	1865	GroupHCHWA_D	0.648274	3969	9
3.7546	0.80535	0.00523461	ERICH1	0.0449739	1	1866	GroupHCHWA_D	0.479497	3658	5
1.58787	0.813727	0.00523774	LINC01354	0.0449766	1	1867	GroupHCHWA_D	0.445455	2860	3
6.88543	-0.547731	0.00524359	SPTLC2	0.0450028	-1	1868	GroupHCHWA_D	0.438021	8164	3
4.53234	0.862706	0.00526976	SDPR	0.0451909	1	1869	GroupHCHWA_D	0.431077	3250	3
8.23347	-0.447937	0.00527451	USP11	0.0451909	-1	1870	GroupHCHWA_D	0.566869	3290	7
6.20531	-0.413626	0.00527494	SMU1	0.0451909	-1	1871	GroupHCHWA_D	0.43802	7091	3
5.00378	0.662078	0.00527938	TEP1	0.0451909	1	1872	GroupHCHWA_D	0.524219	10694	6
4.2129	1.4821	0.00528235	GPNMB	0.0451909	1	1873	GroupHCHWA_D	0.448662	2766	3
5.30222	-0.383371	0.00528336	FIG4	0.0451909	-1	1874	GroupHCHWA_D	0.446699	3105	3
3.85207	-0.579458	0.00528524	TKFC	0.0451909	-1	1875	GroupHCHWA_D	0.575336	4241	7
6.18979	-0.386785	0.00529055	DPP8	0.0452086	-1	1876	GroupHCHWA_D	0.405537	4298	2
10.1888	-0.516116	0.00529295	ATRNL1	0.0452086	-1	1877	GroupHCHWA_D	0.401096	9120	2
5.11794	-0.649679	0.0052985	FSTL5	0.0452187	-1	1878	GroupHCHWA_D	0.382834	4835	1
2.95801	0.921715	0.00529978	ADCY10P1	0.0452187	1	1879	GroupHCHWA_D	0.443204	4569	3
8.18962	-0.438419	0.00531331	BIRC6	0.0453101	-1	1880	GroupHCHWA_D	0.430646	15702	3
8.55936	0.722721	0.0053167	HSP90B1	0.0453149	1	1881	GroupHCHWA_D	0.424179	2862	3
4.02358	0.71125	0.0053337	VAV3	0.0454119	1	1882	GroupHCHWA_D	0.416067	4867	2
1.37347	1.52941	0.00533374	UTS2R	0.0454119	1	1883	GroupHCHWA_D	0.723664	1310	9
6.87523	-0.366633	0.00533678	RAB3GAP1	0.0454136	-1	1884	GroupHCHWA_D	0.431754	4938	3
5.73029	0.934154	0.00534864	LMO2	0.0454904	1	1885	GroupHCHWA_D	0.563095	2417	7
6.00725	0.496418	0.00535251	RPS25	0.0454991	1	1886	GroupHCHWA_D	0.460285	491	4
2.28976	1.15915	0.00535749	WEE1	0.0455116	1	1887	GroupHCHWA_D	0.489993	4047	5
5.77996	-0.554563	0.00536038	CDH18	0.0455116	-1	1888	GroupHCHWA_D	0.451629	3959	4
4.65859	1.65786	0.00536478	PTGS2	0.0455116	1	1889	GroupHCHWA_D	0.369464	4493	1
6.51984	-0.405363	0.00536532	ATP6V1D	0.0455116	-1	1890	GroupHCHWA_D	0.439646	1806	3
2.4104	1.01123	0.0053695	PARD6G	0.0455229	1	1891	GroupHCHWA_D	0.512259	3834	6
6.1341	-0.432152	0.00537274	EML2	0.0455263	-1	1892	GroupHCHWA_D	0.613746	3099	8
3.44219	0.660671	0.0053916	ZNF846	0.045662	1	1893	GroupHCHWA_D	0.452883	2133	4
6.46775	0.669202	0.00541206	PMEPA1	0.0457914	1	1894	GroupHCHWA_D	0.538699	5517	6
5.34966	-0.425432	0.00541259	GAA	0.0457914	-1	1895	GroupHCHWA_D	0.648742	3775	9
1.23948	0.902966	0.0054416	HAUS8	0.0459696	1	1896	GroupHCHWA_D	0.53228	1456	6
4.9837	-0.543755	0.00544251	NELFE	0.0459696	-1	1897	GroupHCHWA_D	0.57335	9366	7
8.27954	-0.674244	0.00544316	SCN1A	0.0459696	-1	1898	GroupHCHWA_D	0.400024	8342	2
2.42871	1.28912	0.0054466	GNB3	0.0459696	1	1899	GroupHCHWA_D	0.590751	1730	8
4.72729	0.479856	0.005448	FGFR1OP	0.0459696	1	1900	GroupHCHWA_D	0.394807	3736	2
4.96935	0.606914	0.0054535	PPID	0.0459888	1	1901	GroupHCHWA_D	0.425845	1834	3
3.82845	0.558924	0.00545601	ZNF430	0.0459888	1	1902	GroupHCHWA_D	0.376116	3919	1
2.80526	-0.885091	0.00548359	MAP10	0.0461862	-1	1903	GroupHCHWA_D	0.395784	5455	2
4.64634	-0.507312	0.00548519	COPG2	0.0461862	-1	1904	GroupHCHWA_D	0.429139	4029	3
6.44538	-0.404758	0.0054945	AASDHPPT	0.0462376	-1	1905	GroupHCHWA_D	0.378189	2861	1
3.98498	-0.592611	0.00549706	MCM6	0.0462376	-1	1906	GroupHCHWA_D	0.435701	3787	3
3.93933	0.999379	0.00551344	XAF1	0.0463511	1	1907	GroupHCHWA_D	0.430464	3624	3
2.37317	1.2177	0.00551885	CCNA2	0.0463723	1	1908	GroupHCHWA_D	0.421372	2798	2
2.0199	0.766848	0.00554587	RRAS	0.0465748	1	1909	GroupHCHWA_D	0.634888	986	9
6.57859	-0.448242	0.00556022	DPP10	0.0466587	-1	1910	GroupHCHWA_D	0.397555	6218	2
5.90926	0.728995	0.00556292	HNRNPAB	0.0466587	1	1911	GroupHCHWA_D	0.542952	1816	7
5.3867	-0.42833	0.00556649	NOL6	0.0466587	-1	1912	GroupHCHWA_D	0.57552	4853	7
1.95844	0.795382	0.00557019	PPP1R13L	0.0466587	1	1913	GroupHCHWA_D	0.657961	3178	9
3.70961	0.858799	0.00557041	PLIN2	0.0466587	1	1914	GroupHCHWA_D	0.487131	2098	5
4.43803	-0.420502	0.00558819	DHDDS	0.0467832	-1	1915	GroupHCHWA_D	0.528245	3328	6
3.6406	-0.532281	0.0055994	OBFC1	0.0468526	-1	1916	GroupHCHWA_D	0.489431	6481	5
2.99626	-0.526444	0.00560842	C14orf79	0.0468954	-1	1917	GroupHCHWA_D	0.566667	1890	7
2.69994	-0.893305	0.00561641	LSM2	0.0468954	-1	1918	GroupHCHWA_D	0.543182	5280	7
7.54481	0.544821	0.00561778	NFAT5	0.0468954	1	1919	GroupHCHWA_D	0.392554	13672	1
2.58284	-0.875938	0.00561881	SNRPN	0.0468954	-1	1920	GroupHCHWA_D	0.518574	1992	6
6.48699	0.725447	0.00561914	ORAI2	0.0468954	1	1921	GroupHCHWA_D	0.572657	10811	7
4.64454	-0.443784	0.00563031	DEPDC5	0.0469642	-1	1922	GroupHCHWA_D	0.527782	6173	6
7.76305	0.534731	0.0056366	CACNA1A	0.0469922	1	1923	GroupHCHWA_D	0.587959	8737	8
4.47622	0.93942	0.00565184	CFH	0.047062	1	1924	GroupHCHWA_D	0.396343	4375	2
3.61621	-0.57793	0.00566157	COQ4	0.047062	-1	1925	GroupHCHWA_D	0.610406	1576	8
4.05567	0.720196	0.00566181	SNAP23	0.047062	1	1926	GroupHCHWA_D	0.414237	2641	2
6.37625	-0.537132	0.00566342	BCAP29	0.047062	-1	1927	GroupHCHWA_D	0.392752	6098	1
5.21773	-0.487653	0.00566407	COPS4	0.047062	-1	1928	GroupHCHWA_D	0.41762	1748	2
4.65081	-0.479662	0.00566714	DENND6B	0.047062	-1	1929	GroupHCHWA_D	0.631107	2006	9
4.40705	0.598993	0.00567162	PKNOX1	0.047062	1	1930	GroupHCHWA_D	0.451233	5352	4
3.27444	1.02539	0.00567222	CARD9	0.047062	1	1931	GroupHCHWA_D	0.641545	2123	9
2.98525	-0.795461	0.00567563	FUT1	0.047062	-1	1932	GroupHCHWA_D	0.572068	4246	7
6.81531	-0.486496	0.00567668	ACLY	0.047062	-1	1933	GroupHCHWA_D	0.523003	4369	6
4.52493	-0.713314	0.00567727	KLHL4	0.047062	-1	1934	GroupHCHWA_D	0.386166	5855	1
3.87599	-1.55876	0.00570147	GJB1	0.0472275	-1	1935	GroupHCHWA_D	0.581073	1733	8
2.8386	0.721372	0.00570312	ZNF781	0.0472275	1	1936	GroupHCHWA_D	0.360917	3142	1
8.58199	-1.27865	0.00571452	TF	0.0472974	-1	1937	GroupHCHWA_D	0.509137	2791	6
5.4882	-0.534588	0.00573863	HSD11B1L	0.0474725	-1	1938	GroupHCHWA_D	0.651744	2122	9
4.23348	1.01621	0.00574787	LINC00342	0.0474859	1	1939	GroupHCHWA_D	0.46867	3128	4
1.74337	-0.896501	0.00574845	HLA-DMA	0.0474859	-1	1940	GroupHCHWA_D	0.531511	8997	6
3.38449	0.693279	0.00574914	ZFP69B	0.0474859	1	1941	GroupHCHWA_D	0.437223	2031	3
0.694395	-0.918565	0.00575355	SSR4P1	0.0474979	-1	1942	GroupHCHWA_D	0.570035	2256	7
6.0297	0.389103	0.00576047	MKL1	0.0475133	1	1943	GroupHCHWA_D	0.608649	4694	8
1.20799	1.19572	0.00576135	FABP5	0.0475133	1	1944	GroupHCHWA_D	0.4487	731	4
4.05033	-0.437831	0.0057872	NDUFAF1	0.0476636	-1	1945	GroupHCHWA_D	0.471404	1731	4
6.45416	0.754463	0.0057878	KCNC3	0.0476636	1	1946	GroupHCHWA_D	0.637436	6272	9
6.18456	0.711041	0.00578913	SOX2	0.0476636	1	1947	GroupHCHWA_D	0.507166	2512	6
1.17861	1.16687	0.00579146	GATA2-AS1	0.0476636	1	1948	GroupHCHWA_D	0.515691	2358	6
2.00594	0.985389	0.00579609	MGC16025	0.0476773	1	1949	GroupHCHWA_D	0.550071	2127	7
6.04484	0.66787	0.0058032	TLE3	0.0477113	1	1950	GroupHCHWA_D	0.585956	5910	8
2.7772	-0.604586	0.005823	ALKBH2	0.047781	-1	1951	GroupHCHWA_D	0.532999	1197	6
5.86377	0.739318	0.00582313	TPP1	0.047781	1	1952	GroupHCHWA_D	0.504953	3533	5
6.30668	-0.394686	0.00582329	LTN1	0.047781	-1	1953	GroupHCHWA_D	0.369907	7756	1
3.67934	-0.645414	0.0058236	TUBG1	0.047781	-1	1954	GroupHCHWA_D	0.590466	1951	8
2.43403	0.825243	0.00583154	MFI2-AS1	0.0477987	1	1955	GroupHCHWA_D	0.615142	951	8
5.65339	0.739107	0.00583172	CDC37L1	0.0477987	1	1956	GroupHCHWA_D	0.372973	3515	1
4.75195	-0.671413	0.00583873	LRRC20	0.0478308	-1	1957	GroupHCHWA_D	0.58869	3625	8
5.67134	-0.423425	0.00584161	NOP9	0.0478308	-1	1958	GroupHCHWA_D	0.535165	6043	6
4.32128	-0.733116	0.00585366	CPNE7	0.0479017	-1	1959	GroupHCHWA_D	0.637561	2657	9
3.51008	0.682831	0.00585625	PSME2	0.0479017	1	1960	GroupHCHWA_D	0.51146	829	6
2.62065	-0.573666	0.00586212	TSTD1	0.0479253	-1	1961	GroupHCHWA_D	0.587798	672	8
6.17824	0.715356	0.00587106	ACBD3	0.0479739	1	1962	GroupHCHWA_D	0.417391	3565	2
3.81326	-0.730854	0.0058745	PLCXD2	0.0479743	-1	1963	GroupHCHWA_D	0.527002	2148	6
4.69255	-0.586121	0.0058785	DCC	0.0479743	-1	1964	GroupHCHWA_D	0.432713	10210	3
0.853855	-0.92281	0.00588008	KIRREL2	0.0479743	-1	1965	GroupHCHWA_D	0.602072	2993	8
2.66237	-0.661537	0.00589499	OSGEPL1	0.0480715	-1	1966	GroupHCHWA_D	0.396805	2316	2
5.19081	0.440596	0.00589854	MSI2	0.0480759	1	1967	GroupHCHWA_D	0.491991	3059	5
5.37322	0.551298	0.00592579	MBD2	0.0482494	1	1968	GroupHCHWA_D	0.456781	5611	4
4.27462	0.583827	0.00592652	ZNF577	0.0482494	1	1969	GroupHCHWA_D	0.435822	3389	3
2.83946	0.704861	0.00592937	C15orf39	0.0482494	1	1970	GroupHCHWA_D	0.625706	4427	9
5.61928	0.7624	0.00593405	IFRD1	0.0482494	1	1971	GroupHCHWA_D	0.421218	4138	2
7.51954	-0.418536	0.00593487	PAFAH1B2	0.0482494	-1	1972	GroupHCHWA_D	0.434274	6413	3
9.01203	0.643822	0.00594617	MAP4K4	0.0483168	1	1973	GroupHCHWA_D	0.469492	7998	4
6.03407	0.523871	0.00595622	ANP32A	0.0483666	1	1974	GroupHCHWA_D	0.439578	2466	3
4.69792	0.494335	0.00595834	GS1-124K5.11	0.0483666	1	1975	GroupHCHWA_D	0.496354	3566	5
3.7877	-0.545287	0.00596767	PXMP4	0.0484179	-1	1976	GroupHCHWA_D	0.497729	5724	5
5.20114	0.91085	0.0059719	PLOD3	0.0484277	1	1977	GroupHCHWA_D	0.619416	2977	9
5.54973	0.896554	0.00597858	C9orf172	0.0484573	1	1978	GroupHCHWA_D	0.74002	2931	9
4.73182	-0.446804	0.00601188	FARP2	0.0487026	-1	1979	GroupHCHWA_D	0.547696	4623	7
4.78958	0.486531	0.00601667	OTUD6B	0.0487168	1	1980	GroupHCHWA_D	0.349331	3438	1
3.15849	0.64451	0.00602568	ZNF829	0.0487651	1	1981	GroupHCHWA_D	0.406327	5247	2
5.96585	-0.454658	0.00603774	KCTD20	0.0488341	-1	1982	GroupHCHWA_D	0.452928	5619	4
1.78393	1.43284	0.0060403	GTF2IRD2	0.0488341	1	1983	GroupHCHWA_D	0.484421	3755	5
6.43742	0.4217	0.00604812	CCDC92	0.0488727	1	1984	GroupHCHWA_D	0.582276	4412	8
3.12419	1.0066	0.00607015	EPN3	0.0489834	1	1985	GroupHCHWA_D	0.614719	3927	8
3.8746	-0.488352	0.00607594	CISD3	0.0489834	-1	1986	GroupHCHWA_D	0.578907	5272	8
4.0487	0.623499	0.00608422	HAUS3	0.0489834	1	1987	GroupHCHWA_D	0.399589	2435	2
4.28716	-0.686091	0.00608459	PAMR1	0.0489834	-1	1988	GroupHCHWA_D	0.541937	3696	7
4.93379	-0.424592	0.0060848	PEX1	0.0489834	-1	1989	GroupHCHWA_D	0.414988	4417	2
4.87884	0.575825	0.00608724	VPS54	0.0489834	1	1990	GroupHCHWA_D	0.388082	3994	1
5.56993	0.631724	0.0060922	PRDX6	0.0489834	1	1991	GroupHCHWA_D	0.438323	1670	3
4.28359	0.728732	0.0060934	MFSD2A	0.0489834	1	1992	GroupHCHWA_D	0.556258	2213	7
5.29204	-0.447522	0.00609667	DIS3L	0.0489834	-1	1993	GroupHCHWA_D	0.463662	3839	4
4.38637	0.521308	0.00609712	REL	0.0489834	1	1994	GroupHCHWA_D	0.400409	7827	2
6.10579	-0.389837	0.00609846	SNX17	0.0489834	-1	1995	GroupHCHWA_D	0.557079	2698	7
3.54668	-0.710623	0.00609848	DHFRL1	0.0489834	-1	1996	GroupHCHWA_D	0.423012	4163	3
6.34795	-0.325143	0.00610901	GPR107	0.0490219	-1	1997	GroupHCHWA_D	0.492867	8341	5
3.91919	1.03213	0.00611045	C20orf24	0.0490219	1	1998	GroupHCHWA_D	0.523543	1253	6
2.91437	-0.589365	0.00611379	ZNF551	0.0490219	-1	1999	GroupHCHWA_D	0.464929	3721	4
[truncated: 49 more rows]

## Sheet: HCHWA-D whole transcriptome
avgLog2CPM	avgLog2FC	pValue	feature	adj.P.Val	DE	Rank	Contrast	GC	Length	GCtile
6.35931	5.50398	1.59396e-09	HSPA6	3.19431e-06	1	8	GroupHCHWA_D	0.585666	2358	8
3.57395	4.05301	3.77563e-08	INHBA	3.18583e-05	1	19	GroupHCHWA_D	0.497011	2175	5
5.43638	3.95047	2.05971e-06	PDYN	0.000362871	1	91	GroupHCHWA_D	0.502159	3011	5
5.1084	3.94232	1.11129e-06	RRAD	0.000269942	1	66	GroupHCHWA_D	0.650407	1476	9
5.06432	3.45923	5.60605e-07	TIMP1	0.000179752	1	50	GroupHCHWA_D	0.584061	916	8
9.1288	3.31759	1.52612e-08	HSPA1A	1.63111e-05	1	15	GroupHCHWA_D	0.598106	12145	8
3.69363	3.25414	0.000421563	LINC01164	0.0102092	1	662	GroupHCHWA_D	0.554078	3384	7
2.76328	3.1233	0.000583605	SECTM1	0.0122465	1	764	GroupHCHWA_D	0.632778	2282	9
6.95508	3.10623	6.5638e-10	HSPB1	1.75385e-06	1	6	GroupHCHWA_D	0.643255	897	9
3.03798	3.0521	0.000723428	CHI3L2	0.0139232	1	833	GroupHCHWA_D	0.490379	1611	5
3.19815	2.99323	0.000183533	SPOCD1	0.00622072	1	473	GroupHCHWA_D	0.613074	3962	8
1.43396	2.90089	0.000494846	GNG10	0.0111267	1	713	GroupHCHWA_D	0.386454	1255	1
6.41717	2.89597	1.85224e-07	BAG3	8.73385e-05	1	34	GroupHCHWA_D	0.569872	2569	7
6.0446	2.83041	5.88927e-07	SERPINH1	0.000185131	1	51	GroupHCHWA_D	0.592672	2320	8
4.18296	2.81587	7.69373e-05	SERPINE1	0.00376055	1	328	GroupHCHWA_D	0.515674	3190	6
8.35272	2.70505	2.53465e-10	DNAJB1	8.1271e-07	1	5	GroupHCHWA_D	0.566207	2681	7
9.83249	2.67838	0.000324196	NPTX2	0.00869149	1	598	GroupHCHWA_D	0.591596	2713	8
6.37379	2.67007	0.000514198	LAMB3	0.0113549	1	726	GroupHCHWA_D	0.587764	4495	8
7.05282	2.66878	4.75442e-11	VEGFA	2.54076e-07	1	3	GroupHCHWA_D	0.522763	3778	6
3.97219	2.63961	0.000798665	PNOC	0.0148174	1	864	GroupHCHWA_D	0.552239	1340	7
2.08534	2.63679	1.80598e-05	C7orf61	0.00161219	1	179	GroupHCHWA_D	0.553785	1004	7
4.14709	2.62465	1.54292e-05	LOXHD1	0.0014812	1	167	GroupHCHWA_D	0.540857	7869	7
2.80417	2.60825	3.67671e-05	HSPA7	0.00246662	1	238	GroupHCHWA_D	0.590052	2493	8
4.18647	2.59746	3.91365e-07	GBP2	0.000146031	1	42	GroupHCHWA_D	0.419409	4132	2
9.19665	2.58277	1.95885e-06	HSPA1B	0.000352857	1	89	GroupHCHWA_D	0.587731	12601	8
4.66479	2.55515	3.99524e-08	ADM	3.20258e-05	1	20	GroupHCHWA_D	0.559748	1590	7
1.46114	2.53601	0.000478735	C2CD4A	0.0109621	1	699	GroupHCHWA_D	0.528882	3445	6
4.18304	2.51375	1.05218e-08	ACRC	1.29758e-05	1	13	GroupHCHWA_D	0.467275	3178	4
2.34741	2.49052	0.000706352	CCL2	0.0136932	1	827	GroupHCHWA_D	0.413655	747	2
2.84028	2.46752	9.38211e-07	G0S2	0.000238752	1	63	GroupHCHWA_D	0.578401	963	8
3.66457	2.46442	5.63909e-05	IGSF22	0.00315003	1	287	GroupHCHWA_D	0.553761	4334	7
2.36088	2.40525	0.00664175	NAT16	0.0514753	0	2068	GroupHCHWA_D	0.620102	2935	9
1.00548	2.39894	0.000178585	LINC00960	0.00611881	1	466	GroupHCHWA_D	0.52876	1443	6
6.98631	2.39771	0.00146474	CHI3L1	0.0210986	1	1113	GroupHCHWA_D	0.551443	1837	7
2.22932	2.38417	3.97145e-05	STC1	0.00256735	1	248	GroupHCHWA_D	0.436936	3877	3
1.28745	2.37048	0.0164076	CSF3	0.0892208	0	2948	GroupHCHWA_D	0.598982	1768	8
4.4838	2.32251	3.4242e-05	HILPDA	0.00238352	1	230	GroupHCHWA_D	0.519122	1412	6
4.7841	2.29971	0.000230702	NGFR	0.00714848	1	517	GroupHCHWA_D	0.627778	3420	9
1.75497	2.29558	0.000168246	DRAXIN	0.00594125	1	454	GroupHCHWA_D	0.617597	1773	9
7.02022	2.28585	4.23015e-09	DDIT4	7.5353e-06	1	9	GroupHCHWA_D	0.580479	1752	8
2.75373	2.2842	0.0162782	SFN	0.0886453	0	2944	GroupHCHWA_D	0.627376	1315	9
3.34745	2.26587	8.43442e-07	WFIKKN1	0.000221673	1	61	GroupHCHWA_D	0.700205	1948	9
1.12808	2.26293	0.00325644	NPC1L1	0.0340024	1	1530	GroupHCHWA_D	0.582937	5251	8
5.11713	2.2604	6.00691e-12	COL27A1	4.81514e-08	1	2	GroupHCHWA_D	0.613188	7810	8
1.89776	2.25445	0.000374804	PCK1	0.00937418	1	641	GroupHCHWA_D	0.508752	2685	6
1.48456	2.24941	0.0074264	FOSL1	0.0548512	0	2170	GroupHCHWA_D	0.598973	1753	8
3.01293	2.24711	0.000384329	TNFRSF12A	0.00953803	1	646	GroupHCHWA_D	0.642442	1032	9
1.69804	2.24575	0.00309974	AQP3	0.0331977	1	1496	GroupHCHWA_D	0.566007	1871	7
0.952817	2.22951	0.00041702	MOB4	0.0101606	1	658	GroupHCHWA_D	0.356473	3947	1
5.57901	2.21716	0.000367399	HS3ST2	0.0092322	1	638	GroupHCHWA_D	0.559939	1952	7
3.76219	2.21	3.09185e-06	LOC100130238	0.000482093	1	102	GroupHCHWA_D	0.610008	3877	8
3.08473	2.19666	9.07939e-09	RAB13	1.21301e-05	1	12	GroupHCHWA_D	0.498833	1714	5
5.88228	2.15151	9.6677e-06	HAP1	0.00109924	1	141	GroupHCHWA_D	0.599293	3958	8
3.01471	2.11758	0.000613267	FOXJ1	0.0126348	1	778	GroupHCHWA_D	0.659848	2640	9
4.26356	2.11349	2.52668e-05	VIM-AS1	0.00198567	1	204	GroupHCHWA_D	0.471888	1992	4
1.50669	2.10374	5.69004e-05	SNX31	0.00316057	1	288	GroupHCHWA_D	0.430143	2455	3
3.32256	2.08459	0.00261425	PRKY	0.0304837	1	1373	GroupHCHWA_D	0.460995	7217	4
4.52569	2.06358	0.0966628	NPAS4	0.262349	0	5907	GroupHCHWA_D	0.589037	3302	8
3.45221	2.05782	6.24339e-08	ANGPT2	4.17058e-05	1	24	GroupHCHWA_D	0.383302	5270	1
1.09665	2.05481	0.000212501	MHRT	0.00685476	1	497	GroupHCHWA_D	0.598174	876	8
4.45121	2.04076	3.15917e-05	LOC101928841	0.0022712	1	223	GroupHCHWA_D	0.609463	9405	8
2.0129	2.02735	3.5183e-06	SAP25	0.000527154	1	107	GroupHCHWA_D	0.668263	835	9
4.86876	2.00596	3.58365e-05	RDH10	0.00245526	1	234	GroupHCHWA_D	0.481201	3963	5
6.21096	2.0015	5.28436e-08	CHORDC1	3.85086e-05	1	22	GroupHCHWA_D	0.366726	3384	1
2.24132	1.99582	3.84132e-05	CEP295NL	0.00251364	1	245	GroupHCHWA_D	0.565298	2167	7
6.41262	1.99466	0.00672641	SERPINA3	0.0516863	0	2085	GroupHCHWA_D	0.52956	1590	6
2.82138	1.98582	0.00489133	MUC6	0.0431919	1	1815	GroupHCHWA_D	0.615769	24009	9
4.09985	1.98294	0.000115737	KCNE4	0.00462719	1	401	GroupHCHWA_D	0.496378	3175	5
6.51812	1.97205	2.56736e-06	IGSF9B	0.000433262	1	95	GroupHCHWA_D	0.62253	4758	9
4.41245	1.97139	5.07799e-05	FNDC9	0.00292843	1	278	GroupHCHWA_D	0.471778	2126	4
3.49318	1.96511	0.000214102	COL1A1	0.00687871	1	499	GroupHCHWA_D	0.615151	5927	8
2.43804	1.951	1.60778e-07	ZNF852	8.31481e-05	1	31	GroupHCHWA_D	0.452792	1970	4
2.25862	1.94959	0.0105335	RPLP0P2	0.0674416	0	2504	GroupHCHWA_D	0.52766	3525	6
1.91953	1.94414	0.000103137	METTL7B	0.00435131	1	380	GroupHCHWA_D	0.548837	1505	7
0.930928	1.94136	0.00245342	LOC643542	0.0292658	1	1344	GroupHCHWA_D	0.355734	2991	1
5.93394	1.93377	3.42452e-06	MIR4697HG	0.000522875	1	105	GroupHCHWA_D	0.500377	5306	5
2.44248	1.93266	0.000232127	HMGN5	0.00714848	1	520	GroupHCHWA_D	0.338194	2126	1
6.80202	1.92607	0.00663681	ARC	0.0514753	0	2067	GroupHCHWA_D	0.66825	2948	9
2.28667	1.91063	1.72091e-05	MSH4	0.00156759	1	176	GroupHCHWA_D	0.371681	3277	1
9.65348	1.90894	2.74868e-06	NEAT1	0.000449661	1	98	GroupHCHWA_D	0.44057	22741	3
4.37808	1.9077	0.00111455	IGFBP7-AS1	0.0180126	1	992	GroupHCHWA_D	0.441325	1389	3
1.64461	1.89651	0.00517532	CXCL2	0.0446495	1	1857	GroupHCHWA_D	0.458853	1203	4
2.51625	1.86581	1.71039e-07	LOC727896	8.56907e-05	1	32	GroupHCHWA_D	0.361396	3409	1
5.40984	1.86508	5.1506e-06	RGS2	0.00068777	1	120	GroupHCHWA_D	0.415556	1350	2
4.24464	1.85895	0.00215153	GBP1	0.0272876	1	1263	GroupHCHWA_D	0.427541	3050	3
2.36724	1.85621	3.89394e-06	PRR34-AS1	0.000562411	1	111	GroupHCHWA_D	0.450153	1635	4
1.18754	1.85225	0.000251048	HIF1A-AS2	0.00760831	1	529	GroupHCHWA_D	0.299854	2051	1
1.56203	1.85039	0.00109961	LOC100129697	0.0178611	1	987	GroupHCHWA_D	0.609475	1562	8
1.47276	1.84761	1.00629e-05	MGC16142	0.00112331	1	143	GroupHCHWA_D	0.440744	1291	3
4.72769	1.83614	0.00191347	SNORD17	0.0253318	1	1211	GroupHCHWA_D	0.49789	237	5
0.989959	1.83125	8.70547e-05	LOC401127	0.00396841	1	350	GroupHCHWA_D	0.476046	1649	5
4.78044	1.82363	0.000737215	CYR61	0.0140703	1	840	GroupHCHWA_D	0.502835	2293	5
4.07548	1.81877	4.38569e-06	FAM153B	0.000622225	1	113	GroupHCHWA_D	0.531215	1794	6
0.831618	1.81083	0.000829091	CLEC18B	0.015011	1	885	GroupHCHWA_D	0.611426	1943	8
2.78199	1.80755	3.68015e-06	FAM153C	0.000536366	1	110	GroupHCHWA_D	0.506964	1077	5
6.76764	1.79996	0.00104866	GADD45B	0.0174763	1	962	GroupHCHWA_D	0.573818	1375	7
4.02953	1.79942	3.36061e-08	CBFA2T3	2.99318e-05	1	18	GroupHCHWA_D	0.611904	4553	8
3.42638	1.7971	6.26401e-05	GSDMB	0.00333637	1	301	GroupHCHWA_D	0.477612	1809	5
3.65595	1.79286	3.48103e-07	RCC1	0.000143097	1	39	GroupHCHWA_D	0.527585	3027	6
3.27234	1.79228	0.000949685	WNT7B	0.0164955	1	923	GroupHCHWA_D	0.630046	3914	9
5.62339	1.78769	0.000402185	MAFF	0.00993109	1	649	GroupHCHWA_D	0.591304	2530	8
1.80901	1.78533	0.00190199	TMEM56-RWDD3	0.025227	1	1208	GroupHCHWA_D	0.419745	1489	2
7.1927	1.78277	1.98479e-06	CRYAB	0.000353558	1	90	GroupHCHWA_D	0.519852	1083	6
1.60284	1.78217	0.000431904	ATE1-AS1	0.0102758	1	673	GroupHCHWA_D	0.512093	951	6
3.73919	1.77988	0.00143361	COL3A1	0.0208373	1	1103	GroupHCHWA_D	0.52204	5490	6
1.79601	1.76883	0.0034761	LOC101927811	0.0353834	1	1575	GroupHCHWA_D	0.445545	909	3
1.1118	1.7627	0.024205	RNA5-8S5	0.112382	0	3453	GroupHCHWA_D	0.570513	1248	7
2.18809	1.76268	5.82968e-05	LOC646903	0.00318981	1	293	GroupHCHWA_D	0.415988	1964	2
1.30002	1.76128	0.000430472	CYP39A1	0.0102758	1	671	GroupHCHWA_D	0.38257	2444	1
3.72489	1.75354	3.75581e-07	MSX1	0.000146031	1	40	GroupHCHWA_D	0.59938	1937	8
2.33219	1.75113	5.31485e-06	CDKN2B	0.000689374	1	123	GroupHCHWA_D	0.451556	3984	4
2.26418	1.74413	0.0584417	SELE	0.192984	0	4855	GroupHCHWA_D	0.42271	3875	3
1.97271	1.73721	0.000775445	COL8A1	0.0145763	1	852	GroupHCHWA_D	0.538984	3091	6
7.57032	1.73116	2.68606e-05	SNORD3A	0.00208033	1	207	GroupHCHWA_D	0.497696	217	5
0.508344	1.72535	0.00324408	TCTE3	0.0340024	1	1526	GroupHCHWA_D	0.443106	1494	3
4.0941	1.72137	0.00206403	COL6A3	0.0266559	1	1241	GroupHCHWA_D	0.530105	10696	6
4.38486	1.71652	6.79641e-07	WBP5	0.000205585	1	53	GroupHCHWA_D	0.369146	1089	1
1.25264	1.71569	0.00916429	SGK3	0.0620544	0	2367	GroupHCHWA_D	0.413411	4608	2
1.05005	1.71435	0.000536943	REP15	0.0116643	1	738	GroupHCHWA_D	0.407375	1139	2
0.421506	1.71253	0.0151106	MIR9-1	0.0843501	0	2872	GroupHCHWA_D	0.404494	89	2
5.86606	1.71113	0.00407146	PABPN1	0.0387612	1	1683	GroupHCHWA_D	0.542231	3102	7
6.0916	1.7102	0.00263151	CDKN1A	0.0305417	1	1380	GroupHCHWA_D	0.570724	2637	7
2.18308	1.709	0.00107998	HGFAC	0.0177343	1	976	GroupHCHWA_D	0.670572	2134	9
3.32714	1.70233	6.71129e-06	SIX4	0.000808988	1	133	GroupHCHWA_D	0.419283	6275	2
4.82005	1.70097	0.0225977	FOSB	0.10744	0	3372	GroupHCHWA_D	0.576536	3776	8
1.84972	1.6981	0.000890778	AQP9	0.0158834	1	899	GroupHCHWA_D	0.432638	3021	3
1.58122	1.68358	2.03659e-05	ZNF69	0.0017649	1	185	GroupHCHWA_D	0.441832	1659	3
3.69356	1.68153	0.000170554	HSPA1L	0.00598519	1	456	GroupHCHWA_D	0.495546	12685	5
3.42368	1.67701	9.54068e-05	SLC7A5P1	0.00419058	1	365	GroupHCHWA_D	0.702439	615	9
5.40871	1.67464	0.000449174	CD44	0.0105126	1	685	GroupHCHWA_D	0.438455	6678	3
2.67883	1.67213	0.000408139	FAM153A	0.00997453	1	656	GroupHCHWA_D	0.531773	1794	6
8.26197	1.66357	1.45313e-06	VIM	0.00030956	1	75	GroupHCHWA_D	0.541667	2136	7
2.09655	1.66081	7.59846e-05	CFAP53	0.0037437	1	325	GroupHCHWA_D	0.450905	1823	4
4.65859	1.65786	0.00536478	PTGS2	0.0455116	1	1889	GroupHCHWA_D	0.369464	4493	1
1.32397	1.64636	0.00895341	HS3ST3A1	0.0612115	0	2345	GroupHCHWA_D	0.505835	4199	5
1.82854	1.6426	0.00324566	NNMT	0.0340024	1	1529	GroupHCHWA_D	0.506337	1578	5
2.88788	1.64099	7.86242e-05	RPS16P5	0.00377396	1	334	GroupHCHWA_D	0.467068	3158	4
1.14088	1.63507	0.00236639	RNU5B-1	0.0287447	1	1319	GroupHCHWA_D	0.393162	117	1
1.89342	1.62708	3.12972e-05	CFI	0.00226069	1	221	GroupHCHWA_D	0.405831	2161	2
3.00877	1.6246	0.0001445	CCDC154	0.00531335	1	436	GroupHCHWA_D	0.656321	2191	9
3.84947	1.62419	1.62706e-06	PRELP	0.00032624	1	79	GroupHCHWA_D	0.539612	5819	6
3.22975	1.62344	0.000802111	FAM46A	0.0148203	1	867	GroupHCHWA_D	0.412865	5612	2
3.95947	1.61963	0.000802396	MYH7	0.0148203	1	868	GroupHCHWA_D	0.573576	6055	7
2.6339	1.6188	0.0052247	CRABP2	0.0449625	1	1862	GroupHCHWA_D	0.561856	1164	7
6.69331	1.61734	0.00408428	SV2C	0.0388601	1	1685	GroupHCHWA_D	0.446522	11603	3
1.52194	1.61419	0.00242997	LINC01605	0.0292118	1	1333	GroupHCHWA_D	0.506201	2177	5
2.67838	1.61132	0.000432581	C17orf67	0.0102758	1	674	GroupHCHWA_D	0.507455	2012	6
7.83316	1.60837	7.49681e-08	HNRNPA2B1	4.80755e-05	1	25	GroupHCHWA_D	0.387088	3702	1
5.6334	1.60763	3.94271e-06	MT2A	0.000564371	1	112	GroupHCHWA_D	0.563246	419	7
1.25808	1.60503	0.00267941	CTB-113P19.1	0.030771	1	1396	GroupHCHWA_D	0.507107	1970	6
3.88729	1.60424	0.000476365	GEM	0.0109621	1	696	GroupHCHWA_D	0.45213	2183	4
5.57191	1.59947	7.01489e-05	METRNL	0.00353657	1	318	GroupHCHWA_D	0.639777	3223	9
4.81472	1.59889	0.0158691	BDNF	0.0872771	0	2915	GroupHCHWA_D	0.461379	7729	4
3.67067	1.5895	1.38528e-05	ANKRD37	0.00138805	1	160	GroupHCHWA_D	0.506424	934	5
1.15952	1.58756	0.000548171	GDPD3	0.0117438	1	748	GroupHCHWA_D	0.567395	1098	7
2.17043	1.58483	0.00236306	TEAD4	0.0287447	1	1316	GroupHCHWA_D	0.634429	2161	9
7.42722	1.58071	1.7656e-07	MKNK2	8.57762e-05	1	33	GroupHCHWA_D	0.618758	3785	9
6.45471	1.57974	0.00709876	CDR1	0.0533126	0	2134	GroupHCHWA_D	0.437259	1299	3
2.48388	1.56572	0.000478383	GBP3	0.0109621	1	698	GroupHCHWA_D	0.417105	3040	2
2.80943	1.56292	0.000668146	E2F5	0.0133896	1	800	GroupHCHWA_D	0.427111	1859	3
2.49884	1.55861	0.00293549	MGP	0.0324117	1	1452	GroupHCHWA_D	0.394433	1473	1
5.38102	1.55499	4.82542e-06	KDM6B	0.000655603	1	118	GroupHCHWA_D	0.623807	6704	9
3.3505	1.55165	0.000604272	SPHK1	0.0125164	1	774	GroupHCHWA_D	0.663832	2469	9
2.37022	1.54848	0.00338833	ACTRT3	0.0349111	1	1556	GroupHCHWA_D	0.490764	2003	5
2.57113	1.54749	0.0135134	GPR3	0.0787519	0	2751	GroupHCHWA_D	0.564333	2114	7
8.85005	1.54554	7.42502e-07	HSPH1	0.00021361	1	54	GroupHCHWA_D	0.412432	5727	2
2.05642	1.54455	5.36407e-05	C15orf62	0.00302805	1	284	GroupHCHWA_D	0.586179	2489	8
1.42866	1.54415	0.000243776	CLEC2B	0.00747036	1	523	GroupHCHWA_D	0.363101	2038	1
2.05607	1.54326	0.000219272	HSP90AB4P	0.00700233	1	502	GroupHCHWA_D	0.444338	3135	3
4.78311	1.54239	3.11659e-05	ANP32B	0.00226069	1	220	GroupHCHWA_D	0.483292	1616	5
2.58435	1.54166	0.0184866	MT1F	0.095544	0	3102	GroupHCHWA_D	0.542443	483	7
2.28388	1.53917	3.04211e-05	PPP1R26-AS1	0.00224574	1	217	GroupHCHWA_D	0.476597	2927	5
0.75283	1.53715	0.00857423	LOC439933	0.0597026	0	2302	GroupHCHWA_D	0.405056	1780	2
6.7047	1.53506	0.0136134	FOS	0.0791624	0	2757	GroupHCHWA_D	0.526413	2158	6
0.721046	1.53364	0.000187878	RPS15AP10	0.0063146	1	477	GroupHCHWA_D	0.405525	905	2
2.50042	1.53212	0.00103146	STC2	0.0172975	1	956	GroupHCHWA_D	0.516751	5343	6
1.43408	1.53198	0.000705691	MYBPH	0.0136932	1	825	GroupHCHWA_D	0.612957	1806	8
2.37637	1.53046	0.0198694	POLR2M	0.0997951	0	3192	GroupHCHWA_D	0.380311	4307	1
1.37347	1.52941	0.00533374	UTS2R	0.0454119	1	1883	GroupHCHWA_D	0.723664	1310	9
1.45956	1.52919	0.00217184	ALOXE3	0.0274165	1	1270	GroupHCHWA_D	0.580776	3454	8
0.762616	1.52341	0.012418	MTHFS	0.0747877	0	2662	GroupHCHWA_D	0.45594	2542	4
6.02948	1.51656	0.000448727	HERC2P3	0.0105126	1	683	GroupHCHWA_D	0.509231	4279	6
3.73546	1.5146	0.0358996	EGR4	0.144138	0	3993	GroupHCHWA_D	0.661188	2373	9
2.93283	1.51339	0.00136845	HMOX1	0.0203515	1	1078	GroupHCHWA_D	0.577987	1590	8
1.28755	1.51286	0.0557498	SNORD113-1	0.187376	0	4770	GroupHCHWA_D	0.328571	70	1
3.72865	1.51237	0.00493011	GPR68	0.0433128	1	1824	GroupHCHWA_D	0.60542	3026	8
2.07697	1.5087	0.000307341	DBH-AS1	0.00844051	1	583	GroupHCHWA_D	0.607255	2233	8
1.80495	1.50706	0.00129403	MB21D1	0.0196271	1	1057	GroupHCHWA_D	0.502775	1802	5
1.70202	1.505	0.01434	TCONS_00029157	0.0811974	0	2831	GroupHCHWA_D	0.57128	2890	7
2.69332	1.50445	0.000370245	LOC100507387	0.00928916	1	639	GroupHCHWA_D	0.417787	967	2
3.42649	1.50217	0.0023247	CCDC102A	0.0285877	1	1302	GroupHCHWA_D	0.662001	2429	9
0.988788	1.49947	0.00271716	S100A4	0.0308934	1	1409	GroupHCHWA_D	0.514184	564	6
5.38515	1.49842	9.81808e-13	HNRNPH3	1.57403e-08	1	1	GroupHCHWA_D	0.404229	2412	2
1.22506	1.49766	0.00730608	RAB17	0.0544118	0	2152	GroupHCHWA_D	0.577289	1999	8
6.34865	1.49723	0.00325762	COL4A1	0.0340024	1	1531	GroupHCHWA_D	0.527636	7454	6
0.200565	1.49646	0.055621	MIR4479	0.187141	0	4764	GroupHCHWA_D	0.704225	71	9
3.3465	1.49454	0.00271661	BMI1	0.0308934	1	1408	GroupHCHWA_D	0.390962	3430	1
4.73831	1.49427	0.000908479	MIR663A	0.0160581	1	907	GroupHCHWA_D	0.770492	183	9
4.00401	1.49322	0.000226077	IL1R1	0.00712076	1	509	GroupHCHWA_D	0.442666	5311	3
6.07909	1.48762	8.09369e-07	DNAJB4	0.000219929	1	59	GroupHCHWA_D	0.3384	2237	1
3.16125	1.4846	0.00941805	MT1G	0.0631494	0	2391	GroupHCHWA_D	0.528395	405	6
4.2129	1.4821	0.00528235	GPNMB	0.0451909	1	1873	GroupHCHWA_D	0.448662	2766	3
4.04621	1.47781	0.0035705	ATF3	0.0360668	1	1587	GroupHCHWA_D	0.513949	2545	6
3.06174	1.47676	0.000223893	ZDHHC11	0.00710782	1	505	GroupHCHWA_D	0.547966	2606	7
3.04641	1.4764	0.000496938	CRHR2	0.0111581	1	714	GroupHCHWA_D	0.58078	3590	8
0.745249	1.47337	0.000425183	LINC00260	0.0102654	1	664	GroupHCHWA_D	0.484706	1275	5
3.0509	1.47251	3.57018e-06	DOK3	0.000529973	1	108	GroupHCHWA_D	0.607123	3538	8
3.78123	1.47191	6.56791e-05	HLA-L	0.0033749	1	312	GroupHCHWA_D	0.480149	27731	5
1.01436	1.47099	0.0028543	SMAD1-AS1	0.0317779	1	1440	GroupHCHWA_D	0.481481	594	5
2.82163	1.46994	0.00147987	PLEKHA4	0.0212592	1	1116	GroupHCHWA_D	0.624392	3083	9
1.17901	1.46969	0.00100209	STAC3	0.0170006	1	945	GroupHCHWA_D	0.561064	1654	7
2.89991	1.46416	0.000555111	MINOS1P1	0.0118502	1	751	GroupHCHWA_D	0.415863	2282	2
1.60652	1.46327	0.00214055	LYZ	0.0272619	1	1258	GroupHCHWA_D	0.416887	1516	2
3.21204	1.45954	0.00670074	LINC01024	0.0516721	0	2079	GroupHCHWA_D	0.44232	3138	3
7.47831	1.45782	6.24221e-05	IGFBP7	0.00333584	1	300	GroupHCHWA_D	0.534548	1317	6
1.57161	1.45729	0.000703534	CACNA1C-AS1	0.0136932	1	822	GroupHCHWA_D	0.537668	2230	6
2.86357	1.4492	0.000142358	DYRK3	0.00525871	1	434	GroupHCHWA_D	0.473242	2261	4
4.63578	1.44803	0.00364166	DNAJB5	0.0365122	1	1599	GroupHCHWA_D	0.559719	2989	7
1.31274	1.44623	0.00427805	FLJ46906	0.0399684	1	1716	GroupHCHWA_D	0.517483	1001	6
1.51682	1.43891	0.0041057	FAM83G	0.0390175	1	1687	GroupHCHWA_D	0.64471	2930	9
3.16509	1.43666	4.28066e-05	ZRSR2	0.00270187	1	254	GroupHCHWA_D	0.49636	1511	5
1.75139	1.43615	0.000339897	UCKL1-AS1	0.00891298	1	611	GroupHCHWA_D	0.618034	3571	9
6.61895	1.43429	4.16657e-05	CEBPD	0.00266129	1	251	GroupHCHWA_D	0.659472	1251	9
1.78393	1.43284	0.0060403	GTF2IRD2	0.0488341	1	1983	GroupHCHWA_D	0.484421	3755	5
1.74593	1.432	0.00336166	TOP1P1	0.0347032	1	1553	GroupHCHWA_D	0.365583	2429	1
3.68028	1.43076	0.00269412	IRF1	0.0308622	1	1399	GroupHCHWA_D	0.530388	3554	6
3.07018	1.42747	0.000644933	TPM3P9	0.0130057	1	795	GroupHCHWA_D	0.468963	2932	4
0.552591	1.42541	0.021398	C6orf141	0.103924	0	3301	GroupHCHWA_D	0.561321	1696	7
2.57976	1.42326	0.00290309	MLKL	0.0322092	1	1445	GroupHCHWA_D	0.497438	2537	5
2.52576	1.42138	3.54371e-05	LOC100289230	0.00244883	1	232	GroupHCHWA_D	0.461087	1876	4
3.40059	1.41912	1.66352e-05	THUMPD3-AS1	0.00155055	1	172	GroupHCHWA_D	0.369892	1860	1
5.78658	1.41764	0.000296463	AHSA2	0.00832381	1	571	GroupHCHWA_D	0.505444	3031	5
3.08527	1.41745	0.00710302	TRIM54	0.0533126	0	2136	GroupHCHWA_D	0.591262	2060	8
2.34797	1.41527	0.110272	LIF	0.283626	0	6233	GroupHCHWA_D	0.568657	3969	7
5.57505	1.41376	0.000961778	COL1A2	0.0166514	1	926	GroupHCHWA_D	0.547773	5411	7
1.55075	1.41198	0.00227563	LSMEM1	0.0282536	1	1291	GroupHCHWA_D	0.410299	1806	2
2.77994	1.41128	9.76484e-05	FAM65C	0.00421967	1	371	GroupHCHWA_D	0.590816	4900	8
0.97605	1.41127	0.00748219	TICAM2	0.0550755	0	2178	GroupHCHWA_D	0.419607	3203	2
1.77026	1.4103	0.000479447	CASP4	0.0109621	1	701	GroupHCHWA_D	0.447109	1418	3
1.75767	1.40589	3.72125e-05	VAMP5	0.00247526	1	241	GroupHCHWA_D	0.603008	665	8
3.40546	1.40478	8.58649e-05	MC1R	0.00396681	1	347	GroupHCHWA_D	0.630526	3099	9
1.78252	1.40438	0.00358965	TCAP	0.036136	1	1592	GroupHCHWA_D	0.633437	963	9
4.87558	1.40401	4.3476e-07	P4HA2	0.000158411	1	44	GroupHCHWA_D	0.530499	2705	6
3.92761	1.40244	0.00613748	ZFP36	0.0490509	1	2006	GroupHCHWA_D	0.572489	1752	7
2.90424	1.4024	1.52416e-05	C3orf62	0.00148093	1	165	GroupHCHWA_D	0.476602	3590	5
1.97055	1.40198	8.61058e-05	AOC2	0.00396681	1	348	GroupHCHWA_D	0.548145	2669	7
0.416081	1.39966	0.0109913	ITPK1-AS1	0.0692657	0	2544	GroupHCHWA_D	0.497651	9364	5
0.681316	1.39771	0.00281873	C6orf118	0.0315265	1	1433	GroupHCHWA_D	0.477433	1839	5
4.05586	1.39667	6.41375e-05	BST2	0.00335923	1	303	GroupHCHWA_D	0.573111	1019	7
4.31869	1.39108	1.50946e-10	HIC1	6.0499e-07	1	4	GroupHCHWA_D	0.704759	3194	9
2.15456	1.3909	0.000175751	BTBD19	0.00607747	1	463	GroupHCHWA_D	0.641858	1572	9
2.57169	1.39045	0.00692404	DDIT4L	0.0526845	0	2107	GroupHCHWA_D	0.415338	2634	2
0.996635	1.38852	0.00309986	CCDC81	0.0331977	1	1497	GroupHCHWA_D	0.469615	2781	4
2.12458	1.38508	0.00275899	LSP1	0.0311819	1	1418	GroupHCHWA_D	0.642654	3512	9
1.39641	1.38464	0.0583254	WNT1	0.192719	0	4852	GroupHCHWA_D	0.629159	2284	9
1.2954	1.38332	0.0262761	ISM2	0.118497	0	3555	GroupHCHWA_D	0.607692	2990	8
2.62105	1.38237	6.33326e-05	SLC25A25-AS1	0.00335923	1	302	GroupHCHWA_D	0.552056	3842	7
4.80492	1.37752	0.000807054	CCDC144CP	0.0148347	1	872	GroupHCHWA_D	0.399382	4204	2
3.87947	1.37478	2.15711e-06	HEBP2	0.000371857	1	93	GroupHCHWA_D	0.520281	1282	6
8.25736	1.37422	7.60828e-06	HSPA5	0.000890335	1	137	GroupHCHWA_D	0.463224	3970	4
7.16872	1.37051	0.00763289	SCARNA7	0.0557131	0	2196	GroupHCHWA_D	0.372727	330	1
3.71739	1.36791	3.68545e-05	NFKB2	0.00246662	1	239	GroupHCHWA_D	0.628314	3885	9
8.07153	1.36541	5.03769e-05	JUN	0.00291854	1	275	GroupHCHWA_D	0.559735	3323	7
5.06289	1.36305	9.00576e-05	RNF217	0.00402174	1	359	GroupHCHWA_D	0.405061	5493	2
4.66529	1.36141	2.16035e-07	ZFHX2	9.62075e-05	1	36	GroupHCHWA_D	0.590394	9182	8
3.2972	1.35783	4.64915e-05	ARL6IP6	0.00283404	1	263	GroupHCHWA_D	0.445506	2826	3
2.48908	1.35746	0.00032908	FOXF1	0.00875207	1	601	GroupHCHWA_D	0.554645	2562	7
7.33329	1.34999	0.000309402	SLC5A3	0.00847921	1	585	GroupHCHWA_D	0.384668	11623	1
1.66857	1.34615	4.8377e-05	NBR2	0.00287711	1	269	GroupHCHWA_D	0.522694	1366	6
3.01845	1.343	0.00196795	LOC102724009	0.0257974	1	1223	GroupHCHWA_D	0.513746	582	6
2.04819	1.34093	0.00322437	IKBIP	0.0339622	1	1521	GroupHCHWA_D	0.388387	4099	1
6.64037	1.34014	0.00100552	ID4	0.0170146	1	947	GroupHCHWA_D	0.414861	3876	2
3.95709	1.33788	2.72988e-05	LINC00632	0.00209404	1	209	GroupHCHWA_D	0.436364	2750	3
4.12779	1.33544	5.73026e-05	FAM101B	0.00316079	1	290	GroupHCHWA_D	0.510221	3620	6
5.94996	1.33221	3.01042e-06	JMJD6	0.000477852	1	101	GroupHCHWA_D	0.499912	5713	5
5.16957	1.33145	1.4471e-05	P4HA1	0.0014321	1	162	GroupHCHWA_D	0.412292	3010	2
0.512122	1.3304	0.0124459	SPG20-AS1	0.0748739	0	2664	GroupHCHWA_D	0.467181	777	4
1.24805	1.3276	0.000325372	LOC100129617	0.00870845	1	599	GroupHCHWA_D	0.493493	1921	5
5.51089	1.32556	1.78423e-06	ZFP36L1	0.000350777	1	81	GroupHCHWA_D	0.517079	4040	6
4.1085	1.32481	0.00010822	CEBPB-AS1	0.00450644	1	385	GroupHCHWA_D	0.538513	2973	6
3.84165	1.32438	0.0223157	ICAM1	0.106574	0	3356	GroupHCHWA_D	0.569008	3246	7
1.48559	1.32162	0.00759775	DPH6-AS1	0.0555943	0	2191	GroupHCHWA_D	0.429926	1477	3
2.02642	1.31682	0.00372108	WNT2	0.0369279	1	1614	GroupHCHWA_D	0.49742	2907	5
1.88741	1.31379	0.00191627	TMEM79	0.0253479	1	1212	GroupHCHWA_D	0.593033	2354	8
4.49294	1.31345	0.00106064	SERTAD1	0.0175664	1	968	GroupHCHWA_D	0.609129	1205	8
6.70574	1.30392	0.000179289	PPP1R15A	0.00611881	1	469	GroupHCHWA_D	0.588334	2383	8
2.80254	1.30282	0.0231378	HLA-DQB1	0.109037	0	3402	GroupHCHWA_D	0.516194	4940	6
6.37336	1.30153	0.0243016	FCGBP	0.112714	0	3456	GroupHCHWA_D	0.632596	12787	9
5.10389	1.30023	0.000345784	RTN4RL2	0.0089387	1	620	GroupHCHWA_D	0.690541	2220	9
1.52057	1.29942	0.00039038	ERC2-IT1	0.00965829	1	648	GroupHCHWA_D	0.463479	2259	4
9.06977	1.29941	0.0658298	VGF	0.207344	0	5090	GroupHCHWA_D	0.705053	2553	9
1.84564	1.29811	0.00247872	LRRIQ1	0.0295017	1	1347	GroupHCHWA_D	0.355437	5444	1
4.39385	1.29738	0.00697733	CD163	0.0528921	0	2114	GroupHCHWA_D	0.460859	4190	4
6.79285	1.29652	8.20049e-05	TET3	0.00386677	1	340	GroupHCHWA_D	0.523228	11387	6
1.87271	1.29327	0.0038792	GIPR	0.0378523	1	1643	GroupHCHWA_D	0.578899	3289	8
4.61112	1.2925	0.000680557	LOC100132111	0.0135201	1	807	GroupHCHWA_D	0.584757	761	8
1.34589	1.29122	0.0164933	ADH1B	0.0895127	0	2954	GroupHCHWA_D	0.399787	2814	2
2.42871	1.28912	0.0054466	GNB3	0.0459696	1	1899	GroupHCHWA_D	0.590751	1730	8
4.45679	1.28868	0.000299417	SOX4	0.0083768	1	573	GroupHCHWA_D	0.525215	4878	6
7.30047	1.28654	8.02184e-10	ATN1	1.83723e-06	1	7	GroupHCHWA_D	0.623671	4419	9
2.47126	1.28346	0.0094622	TNFRSF10D	0.063368	0	2393	GroupHCHWA_D	0.47157	3535	4
1.66194	1.28296	0.00660953	ANP32C	0.0513391	0	2064	GroupHCHWA_D	0.483688	705	5
3.38532	1.28277	0.000275834	SCX	0.00806889	1	548	GroupHCHWA_D	0.693918	1003	9
4.31074	1.28237	1.637e-05	PIANP	0.0015357	1	170	GroupHCHWA_D	0.628995	3035	9
1.20141	1.28086	0.0771062	MIR421	0.228603	0	5407	GroupHCHWA_D	0.388235	85	1
3.5218	1.28047	4.2061e-05	LOC389765	0.00266657	1	252	GroupHCHWA_D	0.409297	1764	2
3.10697	1.27986	0.000601908	TRIP10	0.0124836	1	773	GroupHCHWA_D	0.584305	2230	8
4.38378	1.27935	1.08623e-06	GLIS3	0.000269329	1	64	GroupHCHWA_D	0.491567	7767	5
2.24923	1.27934	0.0112713	SMG1P5	0.0704722	0	2563	GroupHCHWA_D	0.450825	4301	4
4.50002	1.27922	0.00154799	SPR	0.0218655	1	1135	GroupHCHWA_D	0.592186	1459	8
0.303993	1.27718	0.0256048	MIR1250	0.116288	0	3530	GroupHCHWA_D	0.575221	113	7
2.91025	1.27685	4.84544e-05	PRSS53	0.00287711	1	270	GroupHCHWA_D	0.631164	2028	9
3.85254	1.27651	0.000404366	DLL4	0.00994293	1	652	GroupHCHWA_D	0.597076	3420	8
2.15234	1.27475	0.000648936	PGF	0.01307	1	796	GroupHCHWA_D	0.644689	1911	9
2.1735	1.27429	0.000353692	LINC01561	0.00902928	1	628	GroupHCHWA_D	0.516782	2175	6
4.48566	1.27415	0.0416269	DUSP2	0.158067	0	4221	GroupHCHWA_D	0.639169	1685	9
4.05784	1.27296	0.00304422	NUPR1	0.032821	1	1487	GroupHCHWA_D	0.596491	912	8
3.60754	1.27033	0.000228544	SH3BGR	0.00714234	1	513	GroupHCHWA_D	0.458009	1286	4
3.61362	1.26958	0.000231486	RILPL2	0.00714848	1	518	GroupHCHWA_D	0.534703	1801	6
1.45984	1.26476	0.00297967	MGARP	0.0326654	1	1461	GroupHCHWA_D	0.462285	1339	4
3.31643	1.26149	1.5422e-05	SPRY1	0.0014812	1	166	GroupHCHWA_D	0.469582	3041	4
5.91063	1.26087	0.0695938	SOCS3	0.214579	0	5197	GroupHCHWA_D	0.600292	2737	8
1.55678	1.26001	0.00480781	LOC105447645	0.0426557	1	1807	GroupHCHWA_D	0.534668	1399	6
4.05959	1.25986	4.53549e-07	PRRX1	0.000161584	1	45	GroupHCHWA_D	0.403095	4071	2
2.17244	1.25899	0.0014974	EVC2	0.0214152	1	1121	GroupHCHWA_D	0.551657	5130	7
1.24054	1.25849	0.00336931	LOC101929679	0.0347599	1	1554	GroupHCHWA_D	0.553877	993	7
3.19338	1.25663	5.89179e-05	PBDC1	0.00320194	1	295	GroupHCHWA_D	0.445967	1314	3
2.34213	1.25615	0.00522487	KLHL6	0.0449625	1	1863	GroupHCHWA_D	0.474525	6320	4
1.73008	1.25456	0.00846189	NXPH4	0.0592147	0	2291	GroupHCHWA_D	0.660754	1804	9
4.43369	1.25229	7.24514e-05	NFIL3	0.0035961	1	323	GroupHCHWA_D	0.50102	2451	5
1.06387	1.25195	0.0458135	IL6	0.167042	0	4397	GroupHCHWA_D	0.424831	1184	3
3.81018	1.25115	4.52349e-05	UPF3B	0.00280002	1	259	GroupHCHWA_D	0.420133	2404	2
1.87052	1.25046	0.00149942	ZNF788	0.0214249	1	1122	GroupHCHWA_D	0.421444	3768	2
0.856984	1.25039	0.0016157	ASAP1-IT1	0.0226623	1	1143	GroupHCHWA_D	0.425785	1179	3
7.92975	1.24966	0.0253082	SCG2	0.115499	0	3512	GroupHCHWA_D	0.430404	2572	3
2.53167	1.24648	0.000168218	NRSN2-AS1	0.00594125	1	453	GroupHCHWA_D	0.444046	1394	3
2.27206	1.24606	0.0294904	RGR	0.127148	0	3718	GroupHCHWA_D	0.55322	1475	7
6.60438	1.24558	0.0389995	RNA18S5	0.151757	0	4120	GroupHCHWA_D	0.560957	13083	7
3.69188	1.24464	1.82604e-06	GPER1	0.000350777	1	83	GroupHCHWA_D	0.61194	3082	8
5.17203	1.24437	0.000760008	SGK494	0.014392	1	846	GroupHCHWA_D	0.455941	3779	4
8.05485	1.24424	4.80891e-07	SHANK1	0.000167601	1	46	GroupHCHWA_D	0.688544	6643	9
2.51602	1.23764	0.00277241	ZGLP1	0.0312349	1	1423	GroupHCHWA_D	0.599495	1980	8
0.315456	1.23732	0.0449561	CCIN	0.165004	0	4368	GroupHCHWA_D	0.525476	1943	6
4.62702	1.23677	0.0264826	NQO1	0.119261	0	3560	GroupHCHWA_D	0.444656	2629	3
6.17551	1.2367	0.0236801	NUDT3	0.110714	0	3429	GroupHCHWA_D	0.483292	2394	5
4.69201	1.234	0.000785968	SCARNA17	0.0146519	1	860	GroupHCHWA_D	0.629454	421	9
1.48019	1.23279	0.00381284	PCAT19	0.0374556	1	1632	GroupHCHWA_D	0.436108	4625	3
4.93225	1.23267	0.00341839	TP53I11	0.0350324	1	1564	GroupHCHWA_D	0.616518	4480	9
2.90719	1.2312	0.0028094	ADAM12	0.0315188	1	1429	GroupHCHWA_D	0.476446	8937	5
2.10875	1.23013	0.00180948	MRPL45P2	0.0244188	1	1188	GroupHCHWA_D	0.480659	1396	5
6.11711	1.22836	8.15137e-05	XBP1	0.00386126	1	338	GroupHCHWA_D	0.496703	1820	5
5.81492	1.22825	0.0194282	GADD45A	0.0983183	0	3168	GroupHCHWA_D	0.510145	1380	6
3.02897	1.22629	0.0157776	FGF17	0.0868334	0	2913	GroupHCHWA_D	0.627706	1386	9
2.3219	1.22502	0.0004395	LINC00622	0.0103771	1	679	GroupHCHWA_D	0.37673	1590	1
2.52626	1.2248	9.33723e-05	VN1R1	0.00414312	1	361	GroupHCHWA_D	0.402937	1566	2
0.988265	1.22361	0.012733	MIR570	0.0757177	0	2696	GroupHCHWA_D	0.371134	776	1
2.92444	1.22339	0.00106562	CLDN15	0.0175943	1	971	GroupHCHWA_D	0.606061	2244	8
5.26254	1.22274	0.00011314	TGFB2	0.00457967	1	392	GroupHCHWA_D	0.424253	5954	3
3.8022	1.22257	0.00129668	KIRREL	0.0196302	1	1059	GroupHCHWA_D	0.531969	7820	6
3.89737	1.22126	0.00167734	TSC22D1-AS1	0.0231245	1	1162	GroupHCHWA_D	0.442646	2842	3
1.5584	1.21847	0.00192228	TWIST1	0.0253855	1	1214	GroupHCHWA_D	0.572029	1666	7
2.72256	1.21831	0.000814547	RGL3	0.0148903	1	877	GroupHCHWA_D	0.620851	2561	9
2.37317	1.2177	0.00551885	CCNA2	0.0463723	1	1908	GroupHCHWA_D	0.421372	2798	2
3.83044	1.21589	0.00253711	IL17RB	0.029972	1	1357	GroupHCHWA_D	0.456863	2040	4
4.99115	1.21184	9.40979e-05	CD99	0.00415586	1	363	GroupHCHWA_D	0.556175	2510	7
4.23884	1.21076	7.85016e-05	ETV3	0.00377396	1	331	GroupHCHWA_D	0.493174	2930	5
1.81428	1.21052	0.00183713	LINC00951	0.0247088	1	1192	GroupHCHWA_D	0.49007	3122	5
4.17385	1.20914	0.00523223	CP	0.0449739	1	1864	GroupHCHWA_D	0.389876	5235	1
1.01274	1.20847	0.0108806	SUMO4	0.0687845	0	2536	GroupHCHWA_D	0.401163	688	2
5.66946	1.20838	1.42452e-07	HIVEP3	7.84595e-05	1	29	GroupHCHWA_D	0.551258	14115	7
6.89226	1.20656	7.12198e-06	PTMS	0.000845774	1	135	GroupHCHWA_D	0.658261	1150	9
5.60412	1.20441	4.54762e-06	YAP1	0.00062314	1	117	GroupHCHWA_D	0.434081	5704	3
2.88695	1.20316	0.000316419	ABHD3	0.00858958	1	590	GroupHCHWA_D	0.417732	2504	2
5.80165	1.20113	1.80123e-05	SOX9	0.00161219	1	178	GroupHCHWA_D	0.510422	3934	6
2.78104	1.20001	0.00175474	IFITM2	0.0238407	1	1180	GroupHCHWA_D	0.563014	730	7
1.34335	1.19945	0.00468591	DSCAM-IT1	0.0421942	1	1780	GroupHCHWA_D	0.459722	720	4
1.3405	1.19859	0.000248835	DLGAP1-AS1	0.00756987	1	527	GroupHCHWA_D	0.494461	993	5
1.20799	1.19572	0.00576135	FABP5	0.0475133	1	1944	GroupHCHWA_D	0.4487	731	4
1.38671	1.19388	0.00372413	ALMS1P	0.0369279	1	1616	GroupHCHWA_D	0.479899	1592	5
1.07695	1.1936	0.0307221	TLR9	0.130654	0	3769	GroupHCHWA_D	0.616796	3870	9
4.96799	1.19273	0.000378793	HUNK	0.00942982	1	644	GroupHCHWA_D	0.511713	7385	6
2.31439	1.1921	0.00048473	RAB27A	0.0110074	1	706	GroupHCHWA_D	0.39389	3699	1
3.40574	1.1901	0.00213437	RAB39A	0.0272564	1	1254	GroupHCHWA_D	0.432723	1858	3
7.67541	1.18933	7.59466e-07	SLC7A5	0.00021361	1	57	GroupHCHWA_D	0.61149	4543	8
2.28886	1.18903	0.00260919	BTN2A2	0.0304837	1	1372	GroupHCHWA_D	0.486333	3878	5
1.59051	1.18853	0.0101313	LOC729658	0.0657155	0	2470	GroupHCHWA_D	0.426497	2204	3
6.23004	1.18705	2.84612e-08	SAT1	2.68406e-05	1	17	GroupHCHWA_D	0.436394	1187	3
2.36307	1.18588	0.00735723	SH3GL1P1	0.0545818	0	2161	GroupHCHWA_D	0.612335	2497	8
3.16019	1.18571	0.000293234	TGIF1	0.00830587	1	566	GroupHCHWA_D	0.565965	4131	7
3.24044	1.18569	0.012456	LMCD1	0.0748759	0	2667	GroupHCHWA_D	0.500317	3158	5
2.46639	1.18558	0.000538162	NKAPL	0.011675	1	739	GroupHCHWA_D	0.45006	1662	4
4.83118	1.18511	0.0164466	DUSP5	0.0893499	0	2951	GroupHCHWA_D	0.558149	2528	7
2.59465	1.18353	1.88708e-05	ASPRV1	0.00166229	1	182	GroupHCHWA_D	0.555402	2175	7
1.52134	1.18333	0.00129619	HAPLN3	0.0196302	1	1058	GroupHCHWA_D	0.607446	2122	8
1.35749	1.18145	0.00252501	C8orf76	0.0299086	1	1353	GroupHCHWA_D	0.449329	1342	4
1.73224	1.18077	0.00837567	PARD6G-AS1	0.0588168	0	2283	GroupHCHWA_D	0.518598	3737	6
2.98149	1.17904	0.0132121	C7	0.0777593	0	2724	GroupHCHWA_D	0.447683	4014	3
2.48611	1.17883	0.00116222	TRIM5	0.0184323	1	1010	GroupHCHWA_D	0.414048	3659	2
0.669553	1.17802	0.0726354	HES7	0.219901	0	5295	GroupHCHWA_D	0.63258	1682	9
1.49571	1.17783	0.00449127	CMTM1	0.0410748	1	1753	GroupHCHWA_D	0.55814	1118	7
3.94646	1.17766	6.51093e-07	MOB3A	0.000200737	1	52	GroupHCHWA_D	0.580006	3331	8
2.30884	1.17737	8.42279e-05	C20orf96	0.00395951	1	341	GroupHCHWA_D	0.522388	1608	6
7.49103	1.17723	1.90128e-06	FOSL2	0.000352857	1	86	GroupHCHWA_D	0.601604	3991	8
2.23797	1.17642	0.00180867	COX10-AS1	0.0244188	1	1187	GroupHCHWA_D	0.427469	1944	3
2.07103	1.17586	0.000987087	PSMC3IP	0.0168894	1	936	GroupHCHWA_D	0.505051	1980	5
2.63795	1.17513	0.000935411	IL18BP	0.0163539	1	917	GroupHCHWA_D	0.543388	2904	7
3.85144	1.17468	1.18677e-05	CDK11A	0.00123547	1	154	GroupHCHWA_D	0.559954	2627	7
2.52639	1.17104	0.00198016	MNS1	0.025915	1	1225	GroupHCHWA_D	0.38606	2023	1
2.13312	1.17083	0.00138907	RBPMS	0.020525	1	1085	GroupHCHWA_D	0.506678	3444	5
5.18764	1.16807	3.21977e-06	SLC30A1	0.00049634	1	104	GroupHCHWA_D	0.498018	2018	5
5.75678	1.16719	0.000170849	DOT1L	0.00598519	1	457	GroupHCHWA_D	0.62695	7436	9
4.66564	1.16701	0.00149613	COL5A1	0.0214152	1	1119	GroupHCHWA_D	0.602374	8508	8
1.17861	1.16687	0.00579146	GATA2-AS1	0.0476636	1	1948	GroupHCHWA_D	0.515691	2358	6
2.36359	1.16642	0.0125251	RNF217-AS1	0.0751227	0	2673	GroupHCHWA_D	0.370273	5342	1
9.4358	1.16605	0.00127089	MEG3	0.0194667	1	1046	GroupHCHWA_D	0.476673	10567	5
2.82298	1.16596	3.76571e-05	TPRKB	0.00248444	1	243	GroupHCHWA_D	0.361702	752	1
1.60556	1.16574	0.0506905	RNF122	0.177091	0	4589	GroupHCHWA_D	0.549679	1872	7
5.64713	1.16448	0.00870783	C10orf10	0.060226	0	2318	GroupHCHWA_D	0.573301	2060	7
6.51428	1.16206	5.60224e-07	SNTB2	0.000179752	1	49	GroupHCHWA_D	0.416539	9771	2
5.86727	1.16192	0.00256718	SLC7A5P2	0.0301911	1	1362	GroupHCHWA_D	0.573344	2536	7
4.47262	1.16171	4.335e-05	TRAF2	0.00272544	1	255	GroupHCHWA_D	0.612209	2277	8
2.20036	1.15916	0.00381043	ITGB3	0.0374548	1	1631	GroupHCHWA_D	0.500613	4894	5
2.28976	1.15915	0.00535749	WEE1	0.0455116	1	1887	GroupHCHWA_D	0.489993	4047	5
3.41059	1.15812	3.26436e-05	TGFB1	0.00233635	1	224	GroupHCHWA_D	0.646922	2583	9
3.83154	1.15802	5.87103e-06	ING2	0.000741136	1	127	GroupHCHWA_D	0.427831	2702	3
3.42948	1.15755	8.80483e-05	SPACA6P	0.00397631	1	355	GroupHCHWA_D	0.584012	1964	8
3.49553	1.15722	0.000419554	MGST1	0.0102015	1	659	GroupHCHWA_D	0.35514	2354	1
0.548745	1.15642	0.0348191	SERPINA5	0.140893	0	3962	GroupHCHWA_D	0.517758	2337	6
5.10729	1.15589	0.00309929	TPM2	0.0331977	1	1495	GroupHCHWA_D	0.593393	1574	8
7.14271	1.15485	2.03549e-05	DNAJA4	0.0017649	1	184	GroupHCHWA_D	0.493179	3372	5
3.12382	1.15478	0.0608429	USP32P2	0.197487	0	4939	GroupHCHWA_D	0.412565	4775	2
6.4557	1.15311	0.00114912	HERC2P2	0.0183576	1	1003	GroupHCHWA_D	0.495583	18223	5
5.80444	1.15243	1.27738e-06	KIAA1522	0.00029197	1	70	GroupHCHWA_D	0.617553	5606	9
1.82111	1.14958	0.00450508	NPIPB3	0.0411541	1	1755	GroupHCHWA_D	0.544751	3620	7
1.61968	1.14865	0.00185268	PCDHGB8P	0.0248346	1	1196	GroupHCHWA_D	0.521541	1973	6
0.879409	1.14722	0.025176	MEDAG	0.115156	0	3505	GroupHCHWA_D	0.509623	2390	6
6.34024	1.14692	6.69558e-05	STAC2	0.00340773	1	315	GroupHCHWA_D	0.60177	3277	8
3.15665	1.14626	0.000280338	LOC286437	0.00811259	1	554	GroupHCHWA_D	0.42321	2318	3
5.40194	1.14611	2.66602e-06	SLC12A7	0.000440635	1	97	GroupHCHWA_D	0.610765	10608	8
5.40288	1.14498	2.46786e-06	PLOD2	0.000420902	1	94	GroupHCHWA_D	0.403548	4059	2
3.69673	1.14196	0.000807804	ITPRIP	0.0148347	1	873	GroupHCHWA_D	0.540153	7185	7
4.33107	1.14185	3.05955e-05	TRIM52	0.00224574	1	218	GroupHCHWA_D	0.482944	2228	5
1.3766	1.14147	0.00803613	LINC01301	0.0573365	0	2247	GroupHCHWA_D	0.437016	3485	3
4.45987	1.14061	0.0080198	IFITM3	0.0572455	0	2246	GroupHCHWA_D	0.573353	668	7
2.73438	1.14053	0.163101	EIF1AY	0.356438	0	7336	GroupHCHWA_D	0.353989	1404	1
1.86647	1.14028	5.75693e-05	DND1	0.00316079	1	292	GroupHCHWA_D	0.61884	1603	9
1.17039	1.14023	0.0342322	ARID3C	0.139601	0	3931	GroupHCHWA_D	0.642454	1239	9
3.61933	1.1402	0.012094	PDE4C	0.073555	0	2636	GroupHCHWA_D	0.572363	5811	7
3.92754	1.13958	0.000729005	IRAIN	0.0139969	1	835	GroupHCHWA_D	0.600448	5356	8
4.78502	1.13894	0.00497534	IGFBP3	0.0436349	1	1828	GroupHCHWA_D	0.513493	2631	6
3.57529	1.13784	0.000765889	DONSON	0.0144626	1	849	GroupHCHWA_D	0.453212	2522	4
4.83043	1.13631	0.000426073	DDIT3	0.0102654	1	665	GroupHCHWA_D	0.483871	1178	5
2.82147	1.13617	0.00962322	APOC1	0.0639368	0	2413	GroupHCHWA_D	0.566161	461	7
4.82643	1.13569	1.46818e-07	PRPF38B	7.84595e-05	1	30	GroupHCHWA_D	0.421725	3756	2
0.414681	1.13509	0.0341851	FAM167B	0.139487	0	3928	GroupHCHWA_D	0.629707	956	9
1.3631	1.13504	0.0880086	SNORD114-10	0.247117	0	5709	GroupHCHWA_D	0.366197	71	1
7.04056	1.13442	2.72922e-05	NUDC	0.00209404	1	208	GroupHCHWA_D	0.558191	1813	7
2.36829	1.1336	0.00490913	PRR16	0.0432435	1	1820	GroupHCHWA_D	0.46743	2272	4
4.48286	1.13204	0.00879949	KLF10	0.0605073	0	2331	GroupHCHWA_D	0.46049	3594	4
2.78977	1.13181	0.0027696	LOC100507412	0.0312349	1	1421	GroupHCHWA_D	0.539454	8833	6
7.15827	1.13114	0.00109273	ARGLU1	0.0178397	1	982	GroupHCHWA_D	0.47173	1751	4
3.07962	1.13094	0.013546	TGFBI	0.078856	0	2754	GroupHCHWA_D	0.537968	2805	6
1.88779	1.13016	0.0105804	TNFSF13B	0.0676249	0	2508	GroupHCHWA_D	0.368401	2671	1
2.30507	1.12986	0.00070199	AVIL	0.0136932	1	820	GroupHCHWA_D	0.487145	2995	5
2.89349	1.12926	0.00341177	LYVE1	0.0350324	1	1559	GroupHCHWA_D	0.4288	2500	3
4.16718	1.1262	4.95726e-07	BACE2	0.000169095	1	47	GroupHCHWA_D	0.477716	8930	5
3.10264	1.12593	0.00278983	ANKRD18B	0.0313383	1	1427	GroupHCHWA_D	0.37117	3753	1
1.66648	1.12504	0.00391548	FBXL19-AS1	0.0380211	1	1651	GroupHCHWA_D	0.526196	3951	6
1.28648	1.12431	0.0235576	LOC100506136	0.110302	0	3424	GroupHCHWA_D	0.405834	1577	2
5.14314	1.12308	3.57832e-05	ZBED6	0.00245526	1	233	GroupHCHWA_D	0.421088	2940	2
4.36181	1.12254	7.54843e-07	SUZ12P1	0.00021361	1	56	GroupHCHWA_D	0.451923	728	4
2.0718	1.12096	0.00758519	ATAD3C	0.0555277	0	2190	GroupHCHWA_D	0.562581	3859	7
3.64731	1.11781	0.000969638	HIST1H4B	0.0166794	1	932	GroupHCHWA_D	0.557423	357	7
3.10418	1.11777	3.65924e-05	CSRP2	0.00246662	1	237	GroupHCHWA_D	0.486457	923	5
2.50993	1.11727	0.00163444	FANCC	0.022794	1	1149	GroupHCHWA_D	0.49075	5838	5
0.793464	1.11596	0.0185515	CNTD2	0.0957734	0	3105	GroupHCHWA_D	0.631811	1817	9
2.55143	1.11588	0.000341388	SNAP25-AS1	0.00891414	1	613	GroupHCHWA_D	0.378506	2959	1
1.34296	1.11556	0.0165759	IL7R	0.0896879	0	2963	GroupHCHWA_D	0.412391	4600	2
5.87691	1.11549	0.0166865	EGR3	0.0900053	0	2971	GroupHCHWA_D	0.525977	4504	6
4.79624	1.11365	0.000688249	SMG1P3	0.0135941	1	810	GroupHCHWA_D	0.452296	5052	4
2.56041	1.11344	0.0178389	NOTCH2NL	0.0935384	0	3056	GroupHCHWA_D	0.40834	5324	2
4.01024	1.1114	0.00464295	ANXA1	0.0419356	1	1775	GroupHCHWA_D	0.408854	1536	2
2.82656	1.11128	3.62502e-06	LOC100128398	0.000533178	1	109	GroupHCHWA_D	0.462309	1897	4
0.667242	1.10979	0.0207519	ADORA2A-AS1	0.102123	0	3257	GroupHCHWA_D	0.567934	3761	7
2.85714	1.10922	0.00748563	MEG8	0.0550755	0	2179	GroupHCHWA_D	0.528112	498	6
3.95365	1.10875	0.000479139	LOC100129917	0.0109621	1	700	GroupHCHWA_D	0.600588	1700	8
7.753	1.10808	6.45249e-09	SKI	1.03446e-05	1	10	GroupHCHWA_D	0.596811	5707	8
3.76008	1.1058	0.000120819	NR2F2	0.00478266	1	405	GroupHCHWA_D	0.507038	6110	6
2.7799	1.10447	0.0415339	S100A9	0.157902	0	4217	GroupHCHWA_D	0.556326	577	7
4.00945	1.10388	2.45131e-05	ZNRF2P1	0.00195519	1	201	GroupHCHWA_D	0.610128	2034	8
2.01339	1.10371	0.0158851	WHAMMP1	0.0873353	0	2916	GroupHCHWA_D	0.386015	3132	1
2.8301	1.10309	0.000194004	LOC284023	0.00646627	1	481	GroupHCHWA_D	0.481584	2525	5
2.95495	1.10269	0.000128941	CCDC62	0.00495729	1	417	GroupHCHWA_D	0.416978	3216	2
1.61201	1.10238	0.00920781	PDLIM1	0.0622605	0	2371	GroupHCHWA_D	0.550633	1580	7
3.40481	1.10108	0.00401593	NKD2	0.0385514	1	1668	GroupHCHWA_D	0.66715	4140	9
3.36311	1.09992	0.000227461	NFKBIZ	0.00713631	1	511	GroupHCHWA_D	0.46152	4197	4
4.90439	1.09967	2.06816e-07	TRA2A	9.47336e-05	1	35	GroupHCHWA_D	0.410922	2234	2
2.47049	1.09942	0.00375398	SNHG12	0.037059	1	1624	GroupHCHWA_D	0.541272	739	7
4.58002	1.09932	0.000279975	PFDN2	0.00811259	1	552	GroupHCHWA_D	0.517134	642	6
3.30109	1.09872	0.024986	CARTPT	0.11468	0	3493	GroupHCHWA_D	0.491803	915	5
4.05237	1.09835	0.000149418	TCIRG1	0.00541904	1	442	GroupHCHWA_D	0.659651	3041	9
1.61363	1.09797	0.0138421	CASP1	0.0797115	0	2784	GroupHCHWA_D	0.410065	2007	2
4.00654	1.09678	8.98102e-05	RP9P	0.00402174	1	358	GroupHCHWA_D	0.535852	1297	6
0.702036	1.09636	0.0111947	RCVRN	0.0701889	0	2557	GroupHCHWA_D	0.566809	1175	7
2.00777	1.09618	0.162542	ECEL1	0.355591	0	7328	GroupHCHWA_D	0.655387	2896	9
2.24151	1.09591	0.0010061	TMEM265	0.0170146	1	948	GroupHCHWA_D	0.481429	2100	5
2.44305	1.09585	0.000194452	SP2	0.00646773	1	482	GroupHCHWA_D	0.564267	3112	7
1.74195	1.09494	0.0280699	RARRES1	0.123699	0	3638	GroupHCHWA_D	0.442977	1666	3
0.901535	1.0946	0.0180524	ZNF32-AS2	0.0941192	0	3075	GroupHCHWA_D	0.460773	905	4
4.1598	1.09311	0.000461191	BGN	0.0107468	1	688	GroupHCHWA_D	0.614566	2444	8
5.01165	1.09123	0.000349303	SMTN	0.00897439	1	624	GroupHCHWA_D	0.643377	3850	9
4.77833	1.0904	4.64591e-05	SMAD1	0.00283404	1	262	GroupHCHWA_D	0.4376	3117	3
2.69081	1.08909	0.0102538	SH3RF2	0.0662858	0	2480	GroupHCHWA_D	0.553401	3043	7
1.59816	1.08759	0.0097299	C22orf34	0.0641674	0	2430	GroupHCHWA_D	0.554391	3815	7
3.12391	1.08705	0.000343879	SNAPC1	0.00893527	1	617	GroupHCHWA_D	0.376506	2656	1
3.33019	1.08595	0.00236793	LOC101927572	0.0287447	1	1320	GroupHCHWA_D	0.565731	677	7
4.44333	1.08576	1.07592e-05	ZNF326	0.00117342	1	147	GroupHCHWA_D	0.365399	3919	1
2.36781	1.08535	0.0408761	C18orf32	0.156318	0	4192	GroupHCHWA_D	0.411373	1653	2
4.25471	1.08365	6.49735e-05	TAF3	0.00336018	1	310	GroupHCHWA_D	0.520619	3298	6
7.10925	1.08336	0.00654326	LUC7L3	0.0509478	0	2059	GroupHCHWA_D	0.39238	3517	1
1.54313	1.08262	0.0256382	HK3	0.116407	0	3531	GroupHCHWA_D	0.616037	3068	9
1.24724	1.08222	0.00852481	NAV2-AS2	0.0595285	0	2295	GroupHCHWA_D	0.502931	853	5
3.65372	1.08185	0.00288827	ADAM33	0.0320946	1	1442	GroupHCHWA_D	0.631919	3559	9
1.97322	1.08149	0.00177467	LHX4-AS1	0.0240706	1	1182	GroupHCHWA_D	0.515995	2657	6
1.68212	1.08079	0.0031687	ST8SIA6	0.0335982	1	1512	GroupHCHWA_D	0.448498	1398	3
1.00135	1.08059	0.0624706	TTTY10	0.200652	0	4991	GroupHCHWA_D	0.445332	1628	3
6.16552	1.08015	0.000922779	MAN1A1	0.0162571	1	910	GroupHCHWA_D	0.426895	5027	3
4.74047	1.0801	3.32624e-05	STX2	0.00234918	1	227	GroupHCHWA_D	0.434758	3464	3
2.44586	1.07979	0.00663402	CD274	0.0514753	0	2066	GroupHCHWA_D	0.411557	3686	2
3.04391	1.0789	0.0148678	RELB	0.0834421	0	2856	GroupHCHWA_D	0.653187	2275	9
7.22556	1.0772	0.00503739	METTL7A	0.0438934	1	1839	GroupHCHWA_D	0.441003	3390	3
6.22066	1.07679	0.0183154	NAMPT	0.0949036	0	3094	GroupHCHWA_D	0.363239	4581	1
2.64097	1.07422	0.000577223	LOC643355	0.0121764	1	760	GroupHCHWA_D	0.455025	3035	4
6.02605	1.07393	2.21136e-08	RAB7A	2.21578e-05	1	16	GroupHCHWA_D	0.473566	2232	4
5.86277	1.07219	9.4919e-05	RILPL1	0.00418061	1	364	GroupHCHWA_D	0.574314	2624	7
6.43186	1.07093	2.1222e-06	TSHZ1	0.000369817	1	92	GroupHCHWA_D	0.542937	5380	7
2.05871	1.07085	0.00969503	EFCAB5	0.0641481	0	2423	GroupHCHWA_D	0.408266	6339	2
2.79447	1.07009	0.00302154	FAM57A	0.0327186	1	1480	GroupHCHWA_D	0.535096	2080	6
3.22345	1.06766	0.107939	SDS	0.279946	0	6181	GroupHCHWA_D	0.581671	1604	8
1.88935	1.06764	0.00695096	ANO7	0.0527891	0	2111	GroupHCHWA_D	0.606565	4448	8
1.10355	1.06747	0.0812809	SNORD113-3	0.235812	0	5526	GroupHCHWA_D	0.394366	71	1
3.7745	1.06669	1.29303e-06	SERPING1	0.00029197	1	71	GroupHCHWA_D	0.545134	1983	7
2.62598	1.06548	0.0182189	MIS18A	0.0946933	0	3084	GroupHCHWA_D	0.44112	1571	3
1.0541	1.06514	0.0548635	COLEC11	0.185956	0	4730	GroupHCHWA_D	0.562187	2396	7
2.84777	1.06506	0.00963312	LINCR-0001	0.0639496	0	2415	GroupHCHWA_D	0.46422	545	4
7.72183	1.06481	0.000689165	FKBP4	0.0135941	1	812	GroupHCHWA_D	0.511361	3741	6
1.46298	1.06325	0.0116175	SUSD2	0.071884	0	2591	GroupHCHWA_D	0.630537	3183	9
1.6568	1.06243	0.0080552	ZNF552	0.0573976	0	2249	GroupHCHWA_D	0.460459	2352	4
2.54675	1.06223	0.000480002	CCDC18	0.0109621	1	702	GroupHCHWA_D	0.362839	4790	1
0.493248	1.06141	0.0776091	MIR3935	0.229351	0	5425	GroupHCHWA_D	0.461538	104	4
4.73087	1.0613	3.09728e-06	BCCIP	0.000482093	1	103	GroupHCHWA_D	0.403202	3373	2
3.9185	1.06089	0.00302656	LINGO3	0.0327186	1	1483	GroupHCHWA_D	0.709859	2130	9
2.8627	1.05958	0.000989346	ZNF891	0.0168916	1	939	GroupHCHWA_D	0.41815	2303	2
4.90623	1.05945	0.000328227	MATN2	0.00875207	1	600	GroupHCHWA_D	0.48296	4108	5
2.7306	1.05893	0.000887184	MTMR11	0.0158389	1	898	GroupHCHWA_D	0.529804	3003	6
3.87922	1.05843	1.11817e-05	UGDH	0.0011951	1	150	GroupHCHWA_D	0.406133	3196	2
3.25439	1.05822	6.82258e-05	PLAGL2	0.00346138	1	316	GroupHCHWA_D	0.511669	5656	6
0.822115	1.05815	0.00294625	C4orf22	0.0324411	1	1456	GroupHCHWA_D	0.426004	946	3
3.57278	1.0571	0.00133199	RHPN2	0.0199574	1	1070	GroupHCHWA_D	0.479184	3531	5
2.34218	1.057	0.00346582	ANP32A-IT1	0.0353219	1	1572	GroupHCHWA_D	0.485523	3281	5
6.21845	1.05632	8.78857e-07	GSE1	0.000227255	1	62	GroupHCHWA_D	0.547456	7586	7
2.64665	1.05627	0.00265649	LOXL2	0.0306712	1	1388	GroupHCHWA_D	0.575853	3810	7
5.03307	1.05614	0.0852648	EMP1	0.242185	0	5644	GroupHCHWA_D	0.453638	2804	4
5.56133	1.056	4.49207e-06	ZBTB1	0.00062314	1	115	GroupHCHWA_D	0.34686	5668	1
2.01414	1.0557	0.00351684	RASAL2-AS1	0.0356622	1	1581	GroupHCHWA_D	0.459367	2338	4
1.03934	1.0555	0.0517023	CLCF1	0.178978	0	4631	GroupHCHWA_D	0.571718	1973	7
5.41881	1.05528	0.00958201	CROCCP3	0.0637158	0	2411	GroupHCHWA_D	0.518815	5368	6
1.62925	1.05478	0.00857629	ERI3-IT1	0.0597026	0	2303	GroupHCHWA_D	0.523214	1120	6
1.64576	1.05449	0.0254251	MGC70870	0.1158	0	3520	GroupHCHWA_D	0.453698	3110	4
2.28004	1.05388	0.00124021	EID3	0.0192665	1	1032	GroupHCHWA_D	0.448744	1473	4
2.44601	1.05339	0.000705743	RHOJ	0.0136932	1	826	GroupHCHWA_D	0.447085	3619	3
7.41791	1.05145	5.44903e-07	ZMIZ1	0.000179752	1	48	GroupHCHWA_D	0.577366	7555	8
3.88631	1.04995	0.00213622	SH3BP1	0.0272564	1	1256	GroupHCHWA_D	0.640916	2576	9
2.3228	1.04887	0.0117502	TBX18	0.0722887	0	2605	GroupHCHWA_D	0.4059	6068	2
3.20365	1.04873	0.0166856	PDPN	0.0900053	0	2970	GroupHCHWA_D	0.479195	2980	5
3.39143	1.04625	0.000226667	SYNC	0.00712536	1	510	GroupHCHWA_D	0.45949	3493	4
3.90449	1.0452	0.000607567	NTN1	0.0125522	1	776	GroupHCHWA_D	0.624622	5954	9
3.76729	1.04355	6.47095e-05	MAP2K3	0.00335923	1	308	GroupHCHWA_D	0.592249	2374	8
4.94365	1.04204	0.000663261	PASK	0.0133084	1	799	GroupHCHWA_D	0.537275	6224	6
2.56579	1.04116	0.043522	PIRT	0.161851	0	4311	GroupHCHWA_D	0.509233	3466	6
4.15147	1.04078	0.00293768	LINC01004	0.0324136	1	1453	GroupHCHWA_D	0.398981	9419	2
3.19318	1.03949	0.00227272	LOC101926935	0.0282451	1	1290	GroupHCHWA_D	0.502388	6282	5
0.56586	1.0393	0.0200264	GYG2P1	0.100207	0	3204	GroupHCHWA_D	0.538835	824	6
3.42451	1.03909	0.00012363	PLEKHA7	0.00484777	1	408	GroupHCHWA_D	0.558444	4808	7
1.18476	1.03874	0.0490113	PTPRD-AS2	0.173916	0	4517	GroupHCHWA_D	0.380381	2834	1
2.83939	1.03845	0.0117266	LOC100128239	0.0722636	0	2601	GroupHCHWA_D	0.557634	2299	7
0.980861	1.03807	0.019158	RPL23AP32	0.0973814	0	3154	GroupHCHWA_D	0.467742	620	4
1.34372	1.03719	0.00988331	APOBR	0.0647525	0	2447	GroupHCHWA_D	0.630538	3792	9
2.05875	1.03419	0.0175626	MADCAM1	0.0924694	0	3044	GroupHCHWA_D	0.66298	1537	9
5.69708	1.03399	1.0104e-05	RHOQ	0.00112331	1	144	GroupHCHWA_D	0.400925	4542	2
1.55305	1.03381	0.00616531	SYTL3	0.0491736	1	2009	GroupHCHWA_D	0.508633	2896	6
1.18438	1.0338	0.0134504	SLC22A14	0.0785858	0	2743	GroupHCHWA_D	0.543753	1977	7
3.91919	1.03213	0.00611045	C20orf24	0.0490219	1	1998	GroupHCHWA_D	0.523543	1253	6
3.62274	1.03146	1.92657e-06	UBALD1	0.000352857	1	87	GroupHCHWA_D	0.663836	1413	9
8.58536	1.03121	0.000112723	NRGN	0.00457967	1	390	GroupHCHWA_D	0.643678	1218	9
2.31577	1.029	0.103282	DES	0.272703	0	6071	GroupHCHWA_D	0.628559	2248	9
4.54406	1.02868	0.00137613	ID3	0.020409	1	1081	GroupHCHWA_D	0.574657	1239	7
0.844044	1.02795	0.0254117	C10orf113	0.115772	0	3519	GroupHCHWA_D	0.459283	614	4
5.04544	1.02689	0.00246509	WWTR1	0.0293613	1	1346	GroupHCHWA_D	0.4237	5367	3
4.07981	1.02652	0.00076451	KIAA1919	0.0144536	1	848	GroupHCHWA_D	0.436702	3918	3
3.27444	1.02539	0.00567222	CARD9	0.047062	1	1931	GroupHCHWA_D	0.641545	2123	9
0.702952	1.02535	0.0101497	CTD-2201I18.1	0.0657722	0	2474	GroupHCHWA_D	0.448987	2715	4
2.40943	1.02441	0.013519	LRP4-AS1	0.0787558	0	2752	GroupHCHWA_D	0.498701	1540	5
4.59614	1.0236	0.0219311	MIR4426	0.105522	0	3332	GroupHCHWA_D	0.382514	183	1
2.4686	1.02146	0.00643668	CRIPAK	0.0503135	0	2051	GroupHCHWA_D	0.475129	4443	4
2.75622	1.02076	0.00104252	FOXO6	0.0174282	1	959	GroupHCHWA_D	0.705021	2390	9
3.59059	1.01701	0.00134004	PAWR	0.0200219	1	1073	GroupHCHWA_D	0.494618	1951	5
4.23348	1.01621	0.00574787	LINC00342	0.0474859	1	1939	GroupHCHWA_D	0.46867	3128	4
6.15039	1.01528	0.000269595	PNN	0.00793055	1	545	GroupHCHWA_D	0.40904	3606	2
1.52843	1.01444	0.00115952	KLRG1	0.0184323	1	1008	GroupHCHWA_D	0.404922	1788	2
7.3215	1.01417	0.000283651	HSPD1	0.00817895	1	556	GroupHCHWA_D	0.437603	2436	3
5.82625	1.0132	0.00125921	ITGB5	0.0193737	1	1040	GroupHCHWA_D	0.543275	4379	7
1.18212	1.013	0.0190538	LINC00937	0.097098	0	3146	GroupHCHWA_D	0.642965	661	9
3.137	1.01258	0.00851568	CASP7	0.0595155	0	2293	GroupHCHWA_D	0.468801	3093	4
1.14858	1.01225	0.00213281	CTC-338M12.4	0.0272564	1	1253	GroupHCHWA_D	0.515301	1013	6
6.5991	1.01139	0.000943316	DUSP1	0.0164205	1	921	GroupHCHWA_D	0.551383	2024	7
2.4104	1.01123	0.0053695	PARD6G	0.0455229	1	1891	GroupHCHWA_D	0.512259	3834	6
5.30476	1.00919	0.000363413	HNRNPU-AS1	0.00916074	1	636	GroupHCHWA_D	0.354609	5045	1
2.7925	1.00915	0.00200471	SLC25A43	0.0261722	1	1228	GroupHCHWA_D	0.480346	2544	5
2.13428	1.00876	0.024875	NEUROD1	0.114301	0	3489	GroupHCHWA_D	0.421719	3002	2
4.6142	1.00788	0.000187643	AMZ1	0.0063146	1	476	GroupHCHWA_D	0.60093	4518	8
3.91087	1.00758	6.44735e-06	SMNDC1	0.000789037	1	131	GroupHCHWA_D	0.381469	2029	1
3.12419	1.0066	0.00607015	EPN3	0.0489834	1	1985	GroupHCHWA_D	0.614719	3927	8
5.0582	1.0056	0.0161243	PPP1R14C	0.0882569	0	2929	GroupHCHWA_D	0.473541	2211	4
3.99665	1.00543	0.000207094	ATOH8	0.00670735	1	495	GroupHCHWA_D	0.575303	5863	7
3.79421	1.00404	0.000100716	LINC00889	0.00430582	1	375	GroupHCHWA_D	0.399587	2908	2
4.27779	1.00352	0.000204353	SNHG7	0.00667246	1	491	GroupHCHWA_D	0.565396	2676	7
2.59546	1.00204	0.00275992	TACC3	0.0311819	1	1419	GroupHCHWA_D	0.579485	2837	8
5.55148	1.00042	2.28085e-05	BCL6	0.00188231	1	194	GroupHCHWA_D	0.499371	3975	5
1.66224	0.999519	0.0165632	LINC00693	0.0896879	0	2960	GroupHCHWA_D	0.470979	1654	4
3.93933	0.999379	0.00551344	XAF1	0.0463511	1	1907	GroupHCHWA_D	0.430464	3624	3
4.30864	0.999307	0.00221666	ITGA5	0.0278499	1	1276	GroupHCHWA_D	0.580471	4250	8
4.2045	0.998859	6.60402e-05	NSRP1	0.00337563	1	313	GroupHCHWA_D	0.403976	2515	2
7.78767	0.998213	0.000199862	SOD2	0.00659297	1	486	GroupHCHWA_D	0.449887	1776	4
2.31231	0.997144	4.7753e-05	SLX4IP	0.00287527	1	266	GroupHCHWA_D	0.457711	1407	4
6.25751	0.996372	0.00163151	LINC01578	0.0227843	1	1148	GroupHCHWA_D	0.465356	2035	4
6.59739	0.995588	8.14936e-05	LINC-PINT	0.00386126	1	337	GroupHCHWA_D	0.454809	6207	4
3.28175	0.9954	0.000132006	ZNF202	0.00502691	1	421	GroupHCHWA_D	0.49228	4469	5
2.0348	0.994168	0.00613182	HSD17B7P2	0.0490332	1	2004	GroupHCHWA_D	0.470378	1401	4
2.15013	0.993223	0.0896965	ADAD2	0.250176	0	5748	GroupHCHWA_D	0.664497	2304	9
2.18912	0.992701	0.0658101	MS4A6A	0.207344	0	5088	GroupHCHWA_D	0.413685	2543	2
2.96275	0.992273	0.00366956	IL10RB	0.0367002	1	1603	GroupHCHWA_D	0.476288	1961	5
2.67925	0.992038	0.000509798	SNHG3	0.0113233	1	721	GroupHCHWA_D	0.470588	2346	4
1.20686	0.98921	0.00806396	PRRT3-AS1	0.0574074	0	2252	GroupHCHWA_D	0.543974	614	7
0.958347	0.989134	0.0122115	STH	0.0738816	0	2649	GroupHCHWA_D	0.564045	1335	7
1.16432	0.988598	0.0521783	PALM3	0.179989	0	4647	GroupHCHWA_D	0.615487	2260	8
4.90103	0.987397	0.000563243	MERTK	0.0119601	1	755	GroupHCHWA_D	0.469112	3626	4
4.92353	0.987382	9.91497e-06	FOXP4	0.00111941	1	142	GroupHCHWA_D	0.628509	5949	9
0.923219	0.986415	0.0168919	EFCAB12	0.0904919	0	2992	GroupHCHWA_D	0.560353	2154	7
2.65647	0.985931	0.00087942	ELK3	0.0157445	1	895	GroupHCHWA_D	0.428538	4296	3
2.16615	0.985812	0.00461203	GPR35	0.0417504	1	1771	GroupHCHWA_D	0.617103	2596	9
2.46813	0.985413	0.0273715	ENPEP	0.121759	0	3604	GroupHCHWA_D	0.402603	4995	2
2.00594	0.985389	0.00579609	MGC16025	0.0476773	1	1949	GroupHCHWA_D	0.550071	2127	7
2.83627	0.984809	0.0231749	LPIN3	0.109148	0	3404	GroupHCHWA_D	0.586114	4436	8
3.20623	0.983676	0.00139292	ARID3A	0.0205628	1	1086	GroupHCHWA_D	0.611388	2810	8
1.72973	0.983648	0.0346315	DLEU2L	0.140518	0	3951	GroupHCHWA_D	0.316234	1657	1
4.32291	0.983324	2.40274e-05	HRH2	0.00194084	1	198	GroupHCHWA_D	0.52248	4048	6
0.905629	0.983263	0.0400795	POU5F1P5	0.154423	0	4161	GroupHCHWA_D	0.517609	937	6
3.46063	0.982985	0.00754022	SCARNA9	0.0552743	0	2187	GroupHCHWA_D	0.399433	353	2
5.34664	0.982796	0.00473773	CROCCP2	0.0424568	1	1789	GroupHCHWA_D	0.559773	1765	7
1.93094	0.98258	0.00132649	TEAD2	0.0199123	1	1068	GroupHCHWA_D	0.582904	2328	8
5.35881	0.982259	0.00269893	GPR153	0.0308788	1	1401	GroupHCHWA_D	0.659481	4082	9
4.23068	0.981552	0.00288875	TCERG1L	0.0320946	1	1443	GroupHCHWA_D	0.564005	2617	7
3.89684	0.980566	0.00726945	SLC16A9	0.0542064	0	2150	GroupHCHWA_D	0.420617	3987	2
5.09238	0.980406	0.000111801	CLK4	0.00457967	1	389	GroupHCHWA_D	0.373753	2507	1
2.20105	0.980268	0.0428033	PRR26	0.160501	0	4274	GroupHCHWA_D	0.498892	4512	5
1.26368	0.979404	0.0472023	MYT1L-AS1	0.169903	0	4454	GroupHCHWA_D	0.44232	3242	3
3.75317	0.97873	0.00307927	MAMLD1	0.0331098	1	1491	GroupHCHWA_D	0.543416	4860	7
6.42339	0.978334	0.000619756	AEBP1	0.0127354	1	780	GroupHCHWA_D	0.624327	4086	9
5.0106	0.977875	0.00134885	SHISA6	0.0201265	1	1074	GroupHCHWA_D	0.5412	7415	7
5.99543	0.977767	0.000778498	DEDD2	0.0145823	1	855	GroupHCHWA_D	0.623797	2286	9
3.00631	0.976085	0.0975716	HLA-DRB5	0.263923	0	5926	GroupHCHWA_D	0.545377	1168	7
2.15129	0.97421	0.0821337	KREMEN2	0.237341	0	5548	GroupHCHWA_D	0.686923	2057	9
2.53708	0.974085	0.0309468	DKK2	0.131296	0	3778	GroupHCHWA_D	0.419852	3637	2
2.51901	0.973716	0.000622439	PMS2CL	0.0127445	1	783	GroupHCHWA_D	0.455121	1738	4
4.68286	0.973059	3.91676e-07	BTG1	0.000146031	1	43	GroupHCHWA_D	0.386966	4680	1
1.49673	0.973006	0.00748118	SLC25A41	0.0550755	0	2177	GroupHCHWA_D	0.591876	1551	8
3.95668	0.972887	0.138202	RGS1	0.322313	0	6873	GroupHCHWA_D	0.378475	1403	1
2.80437	0.972781	0.000653664	KIF9-AS1	0.0131487	1	797	GroupHCHWA_D	0.529528	2540	6
1.05303	0.971629	0.0510039	CLDN9	0.177528	0	4606	GroupHCHWA_D	0.644878	2050	9
5.59103	0.970964	0.26349	DDX3Y	0.472407	0	8942	GroupHCHWA_D	0.407294	4908	2
5.3618	0.970785	0.000112911	C1QL1	0.00457967	1	391	GroupHCHWA_D	0.713333	1500	9
3.58101	0.969486	2.67682e-05	GSG1L	0.00208033	1	206	GroupHCHWA_D	0.522709	5020	6
6.00025	0.967228	8.06869e-07	SMG7	0.000219929	1	58	GroupHCHWA_D	0.490125	6076	5
0.946749	0.96707	0.0188216	INTS6-AS1	0.0963756	0	3130	GroupHCHWA_D	0.452351	787	4
2.67863	0.965019	0.0128326	CCDC151	0.0760845	0	2704	GroupHCHWA_D	0.612245	2254	8
0.43767	0.963728	0.104814	KLHL23	0.274943	0	6111	GroupHCHWA_D	0.384049	4075	1
3.10155	0.963465	0.00688061	LOC729732	0.0524038	0	2105	GroupHCHWA_D	0.546961	3982	7
3.3297	0.963363	0.00343083	KMT2E-AS1	0.0351204	1	1566	GroupHCHWA_D	0.500833	3600	5
3.56076	0.963322	0.0109227	PDLIM4	0.0690238	0	2537	GroupHCHWA_D	0.604793	2295	8
3.63784	0.96317	0.00512038	LTBP2	0.0444086	1	1847	GroupHCHWA_D	0.57213	8554	7
1.50512	0.963053	0.00416929	LOC105372795	0.0393884	1	1697	GroupHCHWA_D	0.397661	1026	2
6.95314	0.962574	0.000374557	PTGES3	0.00937418	1	640	GroupHCHWA_D	0.458959	3399	4
0.535461	0.962062	0.0489235	FAM132A	0.173719	0	4515	GroupHCHWA_D	0.692234	1043	9
1.35514	0.961624	0.0218962	GPR55	0.105417	0	3330	GroupHCHWA_D	0.551202	3828	7
9.39561	0.960428	0.000130207	MYH9	0.00497018	1	420	GroupHCHWA_D	0.585915	7554	8
2.11714	0.96027	0.00499202	CDC6	0.0436632	1	1832	GroupHCHWA_D	0.444153	3053	3
2.67383	0.960177	0.0123923	ALDH8A1	0.0746614	0	2661	GroupHCHWA_D	0.485536	2558	5
3.67105	0.958783	0.00312583	FOXC1	0.0333615	1	1502	GroupHCHWA_D	0.533198	3449	6
4.89643	0.958716	0.000472992	ZFP36L2	0.0109265	1	694	GroupHCHWA_D	0.544002	3693	7
3.91321	0.95823	0.006374	CCDC40	0.0499453	1	2046	GroupHCHWA_D	0.562136	4981	7
4.42682	0.957673	0.0306687	TNFRSF25	0.130523	0	3767	GroupHCHWA_D	0.636696	1913	9
3.43808	0.956929	0.000925857	PHF21B	0.0162578	1	913	GroupHCHWA_D	0.60414	3961	8
2.52949	0.956696	0.142243	TTTY14	0.328073	0	6951	GroupHCHWA_D	0.512752	1490	6
3.55167	0.956302	0.0423967	ADAMTS2	0.159872	0	4251	GroupHCHWA_D	0.571711	7070	7
4.13493	0.955842	3.39243e-05	EXOG	0.00237948	1	228	GroupHCHWA_D	0.455817	3146	4
6.64782	0.95576	0.00124542	CLK1	0.01931	1	1034	GroupHCHWA_D	0.40116	3794	2
1.21986	0.955431	0.0906505	REM2	0.251665	0	5773	GroupHCHWA_D	0.604626	1859	8
2.58818	0.955064	0.00479064	FAR2P2	0.0426226	1	1800	GroupHCHWA_D	0.474624	2857	4
1.98012	0.954105	0.0353492	GIMAP1	0.142428	0	3979	GroupHCHWA_D	0.475317	4416	4
0.996552	0.954062	0.0138018	ANKRD44-IT1	0.0796513	0	2778	GroupHCHWA_D	0.426567	1069	3
3.08397	0.952869	8.00371e-05	MSI1	0.00381891	1	336	GroupHCHWA_D	0.592269	2975	8
5.6517	0.950285	0.00239227	ARPC5L	0.0289237	1	1326	GroupHCHWA_D	0.527805	1025	6
5.92421	0.950273	8.89186e-05	HEXIM1	0.00400433	1	356	GroupHCHWA_D	0.499687	4785	5
1.88114	0.949665	0.0070223	NANOS3	0.0530295	0	2123	GroupHCHWA_D	0.630252	833	9
5.21645	0.949586	7.07177e-05	CCDC9	0.00355179	1	319	GroupHCHWA_D	0.649182	2078	9
4.78244	0.949325	9.72096e-05	ZNF385A	0.00421206	1	370	GroupHCHWA_D	0.631124	2776	9
2.4828	0.948934	0.00397849	EP400NL	0.0384932	1	1657	GroupHCHWA_D	0.549708	1539	7
3.47004	0.948422	0.000254977	FAM222B	0.00768228	1	532	GroupHCHWA_D	0.534629	4837	6
0.618824	0.948289	0.0576125	FUT7	0.191191	0	4831	GroupHCHWA_D	0.650373	2414	9
2.21617	0.947797	0.0295002	UGDH-AS1	0.127148	0	3719	GroupHCHWA_D	0.445568	2967	3
6.76134	0.947304	0.000186574	EZR	0.00629717	1	475	GroupHCHWA_D	0.523181	3257	6
4.70076	0.946839	0.00061393	C19orf68	0.0126348	1	779	GroupHCHWA_D	0.650223	3588	9
1.80955	0.94665	0.0379468	FAM133DP	0.149512	0	4069	GroupHCHWA_D	0.373452	2019	1
6.21847	0.945638	0.000610483	CGNL1	0.0125962	1	777	GroupHCHWA_D	0.5062	7339	5
5.5314	0.945613	0.143155	EGR1	0.329201	0	6971	GroupHCHWA_D	0.553253	3136	7
5.64853	0.945268	0.00613221	NOL7	0.0490332	1	2005	GroupHCHWA_D	0.494279	874	5
3.58233	0.944717	0.000389639	ZNF586	0.00965486	1	647	GroupHCHWA_D	0.453744	2270	4
1.64626	0.94414	0.0493044	SERPINF2	0.174453	0	4531	GroupHCHWA_D	0.611301	4690	8
2.40193	0.944059	0.00703277	FAM71F2	0.0530585	0	2125	GroupHCHWA_D	0.472232	5834	4
2.70614	0.943846	0.000285846	RNFT1	0.0082127	1	558	GroupHCHWA_D	0.376984	2016	1
1.83118	0.943834	0.032799	GCSH	0.13616	0	3861	GroupHCHWA_D	0.410273	1538	2
4.18152	0.943775	0.000672678	SNRNP48	0.0134348	1	802	GroupHCHWA_D	0.381021	4173	1
6.97818	0.942367	0.000290538	SAFB	0.00827957	1	562	GroupHCHWA_D	0.55527	3112	7
3.95411	0.941617	0.000826585	FAM57B	0.0149944	1	883	GroupHCHWA_D	0.647733	1919	9
1.69032	0.941313	0.0520484	PLA2G5	0.179759	0	4642	GroupHCHWA_D	0.49472	1894	5
5.05634	0.941197	0.000743573	TRIM56	0.0141748	1	841	GroupHCHWA_D	0.585856	4723	8
3.631	0.94083	0.0126426	FAM66B	0.0755898	0	2680	GroupHCHWA_D	0.575705	2305	7
1.23488	0.940422	0.0384302	LOC105377348	0.150348	0	4097	GroupHCHWA_D	0.438298	1175	3
3.04596	0.939966	0.0338026	MIR7-3HG	0.138442	0	3913	GroupHCHWA_D	0.53776	768	6
2.47258	0.939888	0.00372523	ALS2CR12	0.0369279	1	1617	GroupHCHWA_D	0.422601	2345	3
4.33818	0.939605	0.000169661	TNFRSF1A	0.00597803	1	455	GroupHCHWA_D	0.575472	2226	7
4.47622	0.93942	0.00565184	CFH	0.047062	1	1924	GroupHCHWA_D	0.396343	4375	2
5.45495	0.939278	0.00799942	RFTN2	0.0571764	0	2243	GroupHCHWA_D	0.377128	3113	1
4.45887	0.938963	1.42207e-06	SETD8	0.00030956	1	73	GroupHCHWA_D	0.498728	2751	5
2.99424	0.93814	0.0130844	FAM89A	0.0772345	0	2716	GroupHCHWA_D	0.528705	1498	6
1.97996	0.937404	0.0218615	GHRLOS	0.105377	0	3326	GroupHCHWA_D	0.493677	2135	5
4.45644	0.936875	3.28253e-07	EHD2	0.000138488	1	38	GroupHCHWA_D	0.615513	3584	8
2.59101	0.935977	0.0629314	DPY19L2P3	0.201721	0	5001	GroupHCHWA_D	0.474061	1677	4
2.46996	0.935799	0.00270802	ZNF789	0.0308858	1	1405	GroupHCHWA_D	0.454134	1766	4
3.86838	0.934952	0.00035136	ZIC2	0.0089984	1	626	GroupHCHWA_D	0.588908	2975	8
2.80367	0.934687	0.00035507	DNASE1	0.00905006	1	629	GroupHCHWA_D	0.539057	3098	6
2.80098	0.934342	0.0136385	PBLD	0.0791928	0	2760	GroupHCHWA_D	0.425018	2854	3
5.73029	0.934154	0.00534864	LMO2	0.0454904	1	1885	GroupHCHWA_D	0.563095	2417	7
3.04391	0.933997	0.0119743	NANOS1	0.0731044	0	2626	GroupHCHWA_D	0.497515	4627	5
4.15626	0.93369	6.52761e-05	CCHE1	0.00336497	1	311	GroupHCHWA_D	0.419265	2502	2
3.17842	0.93352	0.00418255	TAPT1-AS1	0.0394439	1	1700	GroupHCHWA_D	0.514331	2547	6
6.91822	0.933041	0.00431961	RBM25	0.0402627	1	1720	GroupHCHWA_D	0.409714	4303	2
6.33957	0.932738	0.000126992	CALD1	0.00492107	1	413	GroupHCHWA_D	0.428805	5506	3
0.933415	0.929645	0.0695957	LOC339874	0.214579	0	5199	GroupHCHWA_D	0.408999	1978	2
3.99357	0.928064	0.000139559	TAF4	0.00522584	1	428	GroupHCHWA_D	0.53289	7373	6
4.14092	0.92793	0.000142184	CTNNAL1	0.00525871	1	432	GroupHCHWA_D	0.423285	2594	3
1.77455	0.927863	0.00955186	UCP3	0.0636884	0	2404	GroupHCHWA_D	0.513917	3485	6
6.99973	0.927831	4.36714e-05	CTXN1	0.00273492	1	256	GroupHCHWA_D	0.730008	1263	9
8.08929	0.927808	0.00283131	NCL	0.0315877	1	1437	GroupHCHWA_D	0.458226	2717	4
0.996309	0.927464	0.00762624	SPACA6P-AS	0.0557131	0	2194	GroupHCHWA_D	0.490914	3962	5
5.41461	0.926626	3.13044e-05	SMC5	0.00226069	1	222	GroupHCHWA_D	0.365801	5965	1
5.69452	0.925186	0.000229228	SWAP70	0.00714848	1	514	GroupHCHWA_D	0.427079	4882	3
1.42025	0.924899	0.0463868	LOC389247	0.168386	0	4416	GroupHCHWA_D	0.5621	781	7
6.18791	0.924605	7.10048e-05	TARDBP	0.00355179	1	320	GroupHCHWA_D	0.407873	4217	2
1.6168	0.924569	0.00854378	EBLN2	0.0595539	0	2300	GroupHCHWA_D	0.421781	1662	2
0.546041	0.924221	0.033093	ASAP1-IT2	0.136718	0	3879	GroupHCHWA_D	0.450025	2031	4
2.06718	0.923593	0.00704778	GNG5	0.0530855	0	2128	GroupHCHWA_D	0.526055	806	6
0.915524	0.923457	0.0237163	TNFAIP6	0.110786	0	3432	GroupHCHWA_D	0.366573	1424	1
2.68975	0.923032	0.00210633	SP110	0.027015	1	1250	GroupHCHWA_D	0.48085	3107	5
0.866585	0.922517	0.0303391	CHRNA5	0.129508	0	3755	GroupHCHWA_D	0.419266	3623	2
4.32944	0.922473	0.0040003	C1R	0.0385514	1	1662	GroupHCHWA_D	0.540432	2498	7
0.926597	0.922462	0.0161658	LOC102724094	0.0883772	0	2932	GroupHCHWA_D	0.552826	407	7
0.63589	0.922056	0.0347247	LOC101929505	0.140666	0	3956	GroupHCHWA_D	0.466979	2135	4
1.13443	0.921857	0.0210451	LOC100130357	0.102959	0	3277	GroupHCHWA_D	0.473753	2305	4
6.60851	0.921827	1.61943e-06	BRD4	0.00032624	1	78	GroupHCHWA_D	0.584463	7453	8
2.95801	0.921715	0.00529978	ADCY10P1	0.0452187	1	1879	GroupHCHWA_D	0.443204	4569	3
3.96843	0.921524	0.0772591	PAX8-AS1	0.228758	0	5414	GroupHCHWA_D	0.510496	4621	6
4.76712	0.920991	0.00114453	SCAND2P	0.0183442	1	1000	GroupHCHWA_D	0.511422	4509	6
4.8864	0.920864	0.00152991	ABCD4	0.0217442	1	1128	GroupHCHWA_D	0.510928	3157	6
1.68444	0.920458	0.0136434	KCNK6	0.0791928	0	2762	GroupHCHWA_D	0.579284	2655	8
3.57092	0.91998	0.00222251	LINC00673	0.0278805	1	1278	GroupHCHWA_D	0.522375	2257	6
1.04824	0.919541	0.00738016	AURKAPS1	0.0547077	0	2162	GroupHCHWA_D	0.437215	1537	3
5.95319	0.918894	4.81855e-05	FGFRL1	0.00287711	1	268	GroupHCHWA_D	0.632994	3237	9
2.86775	0.91881	0.00235459	HSD17B7	0.0287447	1	1312	GroupHCHWA_D	0.450857	1750	4
2.34892	0.918629	0.0206642	C4orf19	0.101966	0	3249	GroupHCHWA_D	0.458619	3794	4
1.81581	0.91802	0.00843006	C1orf226	0.0590694	0	2288	GroupHCHWA_D	0.543744	4252	7
5.64104	0.91798	0.00971705	CSRNP1	0.0641636	0	2427	GroupHCHWA_D	0.589084	3188	8
2.50111	0.917211	0.0124463	NOP16	0.0748739	0	2665	GroupHCHWA_D	0.476366	1904	5
2.76102	0.917123	0.00645952	CCDC173	0.0504309	0	2053	GroupHCHWA_D	0.374827	2169	1
0.989957	0.91701	0.0872307	MUC4	0.24565	0	5693	GroupHCHWA_D	0.573004	127130	7
1.26621	0.916994	0.00904766	TCF7L1	0.0615932	0	2355	GroupHCHWA_D	0.608293	2918	8
1.42043	0.916864	0.0620637	LOC101927765	0.200122	0	4972	GroupHCHWA_D	0.481771	768	5
3.32998	0.916738	0.000625744	GLB1L3	0.0127958	1	784	GroupHCHWA_D	0.521739	2944	6
4.20643	0.91671	5.87447e-05	PHACTR4	0.00320194	1	294	GroupHCHWA_D	0.466574	6492	4
6.55486	0.914687	0.000151623	AHSA1	0.00543807	1	447	GroupHCHWA_D	0.517143	1400	6
3.29324	0.913957	0.0132016	TDRD6	0.0777259	0	2723	GroupHCHWA_D	0.411385	8977	2
1.2742	0.913949	0.0182577	LINC00158	0.0947272	0	3090	GroupHCHWA_D	0.358401	1476	1
6.664	0.913515	0.0113986	COL4A2	0.0710508	0	2572	GroupHCHWA_D	0.622545	6263	9
3.11362	0.912634	0.0157058	FAM227A	0.0866764	0	2905	GroupHCHWA_D	0.447307	10362	3
1.12581	0.911494	0.0445025	LOC101927051	0.163912	0	4351	GroupHCHWA_D	0.581491	1945	8
5.20114	0.91085	0.0059719	PLOD3	0.0484277	1	1977	GroupHCHWA_D	0.619416	2977	9
2.35602	0.910427	0.00414566	MZF1-AS1	0.0392809	1	1692	GroupHCHWA_D	0.559094	2606	7
1.25952	0.910311	0.0283186	PIN1P1	0.124192	0	3655	GroupHCHWA_D	0.609438	996	8
7.37446	0.909925	0.000278409	PTMA	0.00810064	1	551	GroupHCHWA_D	0.456504	1207	4
6.79168	0.909441	0.00682042	KCNQ1OT1	0.0521684	0	2096	GroupHCHWA_D	0.437183	91671	3
4.68121	0.908981	0.0064938	GTF2E2	0.0506119	0	2057	GroupHCHWA_D	0.46875	1536	4
3.20734	0.907742	0.00483527	LOC642776	0.0427574	1	1813	GroupHCHWA_D	0.444074	2101	3
4.12382	0.907052	0.00265732	FKBP11	0.0306712	1	1389	GroupHCHWA_D	0.522064	1337	6
2.64059	0.90699	0.00679516	LOC100289580	0.0520497	0	2093	GroupHCHWA_D	0.64089	3776	9
7.49954	0.905885	0.00118424	KLHL2	0.0186135	1	1020	GroupHCHWA_D	0.428312	3299	3
1.80037	0.905507	0.00704959	CATSPERG	0.0530855	0	2129	GroupHCHWA_D	0.554243	3724	7
4.51036	0.904934	6.99085e-05	BANP	0.00353556	1	317	GroupHCHWA_D	0.580119	2696	8
0.700756	0.904745	0.0222677	CACNA1C-AS2	0.106464	0	3353	GroupHCHWA_D	0.517241	609	6
7.43935	0.904719	0.000566244	GOLM1	0.012008	1	756	GroupHCHWA_D	0.482991	3263	5
2.25069	0.904433	0.00265484	BEND7	0.0306712	1	1387	GroupHCHWA_D	0.458306	3094	4
1.46133	0.904163	0.00743893	ZEB1-AS1	0.0548831	0	2173	GroupHCHWA_D	0.398102	2213	2
4.87144	0.903975	0.00838256	CEBPZOS	0.0588394	0	2284	GroupHCHWA_D	0.368216	3335	1
1.83343	0.903581	0.0210534	DIRAS3	0.102968	0	3278	GroupHCHWA_D	0.477621	1631	5
5.76921	0.903282	0.00234205	PAXBP1	0.0286843	1	1309	GroupHCHWA_D	0.415503	4296	2
5.02386	0.902996	1.2151e-06	BCL9L	0.000282326	1	69	GroupHCHWA_D	0.635483	7739	9
1.58852	0.902993	0.0432082	VAC14-AS1	0.161059	0	4301	GroupHCHWA_D	0.501572	2227	5
1.23948	0.902966	0.0054416	HAUS8	0.0459696	1	1896	GroupHCHWA_D	0.53228	1456	6
4.38754	0.902461	0.00204736	XKR6	0.0265131	1	1238	GroupHCHWA_D	0.506518	3759	5
4.86408	0.901569	0.00202455	QRICH2	0.0263838	1	1230	GroupHCHWA_D	0.562397	5457	7
0.848399	0.901476	0.106296	PABPC4L	0.277727	0	6136	GroupHCHWA_D	0.332996	4943	1
2.36312	0.900664	0.00420501	SNHG10	0.0396003	1	1702	GroupHCHWA_D	0.500765	1961	5
2.88297	0.90043	0.00126161	LYAR	0.0193737	1	1044	GroupHCHWA_D	0.439875	1605	3
2.9431	0.900131	0.0357546	LINC00473	0.143701	0	3988	GroupHCHWA_D	0.478225	2434	5
6.6144	0.900089	5.91291e-05	AJAP1	0.00320256	1	296	GroupHCHWA_D	0.547784	3317	7
5.79699	0.897849	5.94585e-06	EIF5B	0.000744718	1	128	GroupHCHWA_D	0.397403	4698	2
6.94087	0.897724	7.61257e-05	MSL1	0.0037437	1	326	GroupHCHWA_D	0.44331	3819	3
3.72201	0.897364	0.00213706	TRMT13	0.0272564	1	1257	GroupHCHWA_D	0.344893	3143	1
6.80154	0.897218	0.00102988	SAFB2	0.0172975	1	953	GroupHCHWA_D	0.574141	3318	7
4.17638	0.897002	0.00190561	SETD6	0.0252485	1	1210	GroupHCHWA_D	0.488419	2979	5
4.76971	0.896962	0.0119087	LINC00472	0.0728424	0	2621	GroupHCHWA_D	0.386095	9565	1
5.54973	0.896554	0.00597858	C9orf172	0.0484573	1	1978	GroupHCHWA_D	0.74002	2931	9
5.46758	0.896323	0.0112734	SAP30	0.0704722	0	2564	GroupHCHWA_D	0.517583	1109	6
1.03996	0.896072	0.0925015	FAM150B	0.254757	0	5821	GroupHCHWA_D	0.537911	1398	6
2.20378	0.895289	0.0975288	BOK-AS1	0.263923	0	5924	GroupHCHWA_D	0.582324	826	8
2.12408	0.895111	0.00669911	IL3RA	0.0516721	0	2078	GroupHCHWA_D	0.535088	3420	6
1.58029	0.894651	0.0294779	CCDC110	0.127143	0	3717	GroupHCHWA_D	0.35221	2896	1
3.41214	0.894358	0.0168536	CGN	0.0904663	0	2985	GroupHCHWA_D	0.561851	5101	7
4.63605	0.893971	2.43239e-05	ZDHHC18	0.00194981	1	200	GroupHCHWA_D	0.59605	3139	8
14.0974	0.893839	0.00114964	RNA28S5	0.0183576	1	1004	GroupHCHWA_D	0.694045	20284	9
4.64303	0.893357	4.42816e-06	PHF10	0.000622739	1	114	GroupHCHWA_D	0.465033	1673	4
2.71758	0.892189	0.000141224	CA5BP1	0.00525871	1	430	GroupHCHWA_D	0.586519	994	8
7.24444	0.892142	0.0015629	YY1	0.0220373	1	1137	GroupHCHWA_D	0.523267	3159	6
0.550803	0.89173	0.043009	LINC00222	0.160785	0	4287	GroupHCHWA_D	0.484883	1753	5
3.02592	0.891569	0.0755037	LOC284581	0.225582	0	5366	GroupHCHWA_D	0.425678	3061	3
2.91869	0.890537	0.0015477	GORAB	0.0218655	1	1134	GroupHCHWA_D	0.362323	3530	1
3.25585	0.890528	0.00436887	UNC13D	0.0405099	1	1729	GroupHCHWA_D	0.632969	4392	9
1.31722	0.890373	0.0152115	PPIC	0.0847067	0	2879	GroupHCHWA_D	0.459547	1236	4
6.83673	0.889105	0.000277916	GNA12	0.00810064	1	550	GroupHCHWA_D	0.555514	5395	7
3.67339	0.888845	0.007859	PVRIG	0.0567037	0	2222	GroupHCHWA_D	0.629063	1569	9
0.646058	0.888735	0.131125	MIR6717	0.312692	0	6722	GroupHCHWA_D	0.534247	73	6
5.29188	0.888709	3.60464e-05	ZFHX3	0.00245913	1	235	GroupHCHWA_D	0.512989	16168	6
0.498274	0.887622	0.0829116	BNIPL	0.238284	0	5578	GroupHCHWA_D	0.503317	2412	5
0.836095	0.886471	0.0142744	SNHG4	0.0810034	0	2825	GroupHCHWA_D	0.523933	1546	6
4.83899	0.886287	8.74706e-05	OAF	0.00396841	1	353	GroupHCHWA_D	0.640172	1862	9
2.4594	0.885949	0.0334198	H3F3C	0.137451	0	3898	GroupHCHWA_D	0.446547	1057	3
2.30351	0.885862	0.0239275	ZBED3-AS1	0.111578	0	3438	GroupHCHWA_D	0.450088	1142	4
4.12113	0.885671	0.000255405	ZSCAN31	0.00768228	1	533	GroupHCHWA_D	0.43807	3399	3
1.01867	0.885182	0.0691698	LOC100506860	0.21391	0	5184	GroupHCHWA_D	0.524815	947	6
2.91312	0.885176	0.0026598	S1PR3	0.0306777	1	1390	GroupHCHWA_D	0.497721	4388	5
4.40773	0.883456	0.00194893	HIBCH	0.025674	1	1217	GroupHCHWA_D	0.425477	1939	3
7.75369	0.883332	0.0167861	GJA1	0.0902769	0	2981	GroupHCHWA_D	0.405806	3169	2
1.08712	0.882564	0.0261521	ARHGAP26-IT1	0.118082	0	3550	GroupHCHWA_D	0.443299	388	3
1.94228	0.881926	0.0342527	PAXIP1-AS2	0.139623	0	3933	GroupHCHWA_D	0.474279	1769	4
1.3424	0.881627	0.146341	PLAU	0.333456	0	7035	GroupHCHWA_D	0.537918	2690	6
2.57457	0.881417	0.00350762	LINC01138	0.0356138	1	1579	GroupHCHWA_D	0.474172	2052	4
6.58984	0.8809	0.00236299	RBBP6	0.0287447	1	1315	GroupHCHWA_D	0.434813	7256	3
3.21646	0.880158	0.0253185	DNALI1	0.115499	0	3514	GroupHCHWA_D	0.478671	2649	5
1.82876	0.879039	0.0136972	EFTUD1P1	0.0793523	0	2767	GroupHCHWA_D	0.497858	1167	5
6.67604	0.87779	6.4185e-05	SERP1	0.00335923	1	305	GroupHCHWA_D	0.40826	3172	2
3.24165	0.877585	0.000358498	SOX1	0.00910846	1	631	GroupHCHWA_D	0.544304	4108	7
4.73989	0.877048	0.000288184	NAA16	0.00826218	1	559	GroupHCHWA_D	0.386542	4592	1
1.12748	0.877017	0.00880133	SIGLEC9	0.0605073	0	2332	GroupHCHWA_D	0.54703	2020	7
9.23014	0.876128	0.00185802	HIPK2	0.0248646	1	1198	GroupHCHWA_D	0.495961	15225	5
2.32016	0.875764	0.0114436	LOC171391	0.0712605	0	2574	GroupHCHWA_D	0.587334	979	8
5.75219	0.875611	4.66005e-08	OTUD4	3.55762e-05	1	21	GroupHCHWA_D	0.385391	7434	1
4.71124	0.875415	0.298405	UTY	0.509738	0	9385	GroupHCHWA_D	0.404181	8610	2
6.50123	0.875391	0.00182882	LRRFIP1	0.0246383	1	1190	GroupHCHWA_D	0.456966	7773	4
1.05939	0.873977	0.0170215	ZNF137P	0.0909325	0	3001	GroupHCHWA_D	0.415056	2484	2
6.84397	0.87349	1.51328e-05	COL6A1	0.00147932	1	164	GroupHCHWA_D	0.635266	4225	9
5.80486	0.873345	1.46748e-06	ZNF395	0.00030956	1	76	GroupHCHWA_D	0.534777	4802	6
1.86739	0.873154	0.0799664	COL13A1	0.233477	0	5491	GroupHCHWA_D	0.587185	3137	8
2.79703	0.873149	0.0105161	CARD10	0.0673836	0	2502	GroupHCHWA_D	0.645037	3899	9
7.46454	0.872459	0.0012401	FN1	0.0192665	1	1031	GroupHCHWA_D	0.495496	8993	5
3.29676	0.872458	0.0191148	MYL9	0.097347	0	3148	GroupHCHWA_D	0.612364	1197	8
1.46119	0.872412	0.0730233	BRE-AS1	0.220764	0	5303	GroupHCHWA_D	0.54129	1659	7
5.90428	0.87219	0.0152534	RAB4A	0.0849104	0	2880	GroupHCHWA_D	0.401647	3035	2
3.57868	0.871922	0.000134476	ZNF431	0.00509674	1	423	GroupHCHWA_D	0.371035	3846	1
7.01996	0.871898	8.15436e-08	ZMYND8	5.0281e-05	1	26	GroupHCHWA_D	0.472517	6404	4
3.97611	0.87127	8.52511e-05	NAF1	0.00396681	1	343	GroupHCHWA_D	0.447903	2313	3
2.16796	0.869687	0.00327571	GGT1	0.0340572	1	1542	GroupHCHWA_D	0.614919	2976	8
2.77697	0.869512	0.00229586	DLEU2	0.0283787	1	1297	GroupHCHWA_D	0.476156	2768	5
5.9783	0.869465	0.000378768	ZNF516	0.00942982	1	643	GroupHCHWA_D	0.532808	8626	6
3.31602	0.868415	0.157708	HSPE1	0.349368	0	7237	GroupHCHWA_D	0.499475	953	5
2.65395	0.86787	0.0124606	ADAM8	0.0748759	0	2668	GroupHCHWA_D	0.639503	3301	9
1.3084	0.866341	0.0300395	ST7-OT4	0.128734	0	3741	GroupHCHWA_D	0.448473	1572	3
6.86011	0.866323	1.37361e-05	PAPOLA	0.00138502	1	159	GroupHCHWA_D	0.365745	8320	1
3.85607	0.866277	0.00213503	SIRT7	0.0272564	1	1255	GroupHCHWA_D	0.618718	1731	9
2.70566	0.866223	0.0133748	PRICKLE4	0.0783433	0	2737	GroupHCHWA_D	0.617861	1646	9
0.735557	0.865931	0.0752685	LOC339059	0.225124	0	5360	GroupHCHWA_D	0.633131	2137	9
2.38856	0.865642	0.028367	MROH6	0.124317	0	3658	GroupHCHWA_D	0.683692	6500	9
3.7829	0.864719	0.000305564	BANF1	0.0084302	1	581	GroupHCHWA_D	0.552083	1152	7
3.20032	0.864597	0.00317517	DFFB	0.0336446	1	1513	GroupHCHWA_D	0.52493	3229	6
1.45235	0.864423	0.0591908	RTCA-AS1	0.194337	0	4883	GroupHCHWA_D	0.473077	780	4
2.24843	0.863779	0.0554004	S100A10	0.186688	0	4757	GroupHCHWA_D	0.54218	1055	7
4.40452	0.863699	0.00214089	SPAG5	0.0272619	1	1259	GroupHCHWA_D	0.499737	3808	5
2.64741	0.862983	0.255558	EGR2	0.464577	0	8819	GroupHCHWA_D	0.517789	3148	6
4.00276	0.86289	0.000456752	GKAP1	0.0106744	1	686	GroupHCHWA_D	0.44047	1873	3
1.25772	0.862812	0.0355661	NPIPB4	0.143157	0	3983	GroupHCHWA_D	0.540133	4049	7
5.9561	0.862709	0.131197	MYH11	0.312692	0	6726	GroupHCHWA_D	0.552434	13884	7
4.53234	0.862706	0.00526976	SDPR	0.0451909	1	1869	GroupHCHWA_D	0.431077	3250	3
4.91196	0.862492	0.0276548	SRGN	0.122598	0	3616	GroupHCHWA_D	0.38118	1254	1
2.68816	0.862477	0.00876999	SOX21-AS1	0.0604213	0	2327	GroupHCHWA_D	0.455794	2986	4
5.13812	0.862228	0.00366312	CSF1	0.0366951	1	1600	GroupHCHWA_D	0.57762	4915	8
4.4543	0.862002	9.67125e-05	PSMA3-AS1	0.0042037	1	368	GroupHCHWA_D	0.378834	2608	1
3.10405	0.861351	0.000225195	LINC00963	0.00711706	1	507	GroupHCHWA_D	0.550424	2122	7
4.38132	0.861303	0.00860105	KCNG3	0.0597971	0	2306	GroupHCHWA_D	0.484833	3824	5
6.7988	0.861283	0.000778631	FLT1	0.0145823	1	856	GroupHCHWA_D	0.421732	12010	2
5.65418	0.860198	0.00241298	C9orf3	0.0290473	1	1331	GroupHCHWA_D	0.476632	5178	5
3.16306	0.858842	0.00638148	ZNF366	0.0499666	1	2047	GroupHCHWA_D	0.487416	6278	5
3.70961	0.858799	0.00557041	PLIN2	0.0466587	1	1914	GroupHCHWA_D	0.487131	2098	5
5.97584	0.858549	0.00907112	COL7A1	0.061596	0	2361	GroupHCHWA_D	0.647944	9169	9
3.02188	0.858523	0.000189412	C19orf44	0.00635282	1	478	GroupHCHWA_D	0.560688	3897	7
4.14316	0.858309	0.00956009	MAMDC4	0.0636884	0	2406	GroupHCHWA_D	0.668306	3660	9
3.399	0.856856	0.0092432	C16orf87	0.0623946	0	2375	GroupHCHWA_D	0.34201	1383	1
1.46014	0.856332	0.081302	AIRE	0.23583	0	5527	GroupHCHWA_D	0.652893	2299	9
1.47447	0.855931	0.00821382	TMEM106A	0.0580957	0	2266	GroupHCHWA_D	0.512905	3332	6
5.68003	0.855886	2.3327e-05	SPRY2	0.00190363	1	196	GroupHCHWA_D	0.452607	2110	4
3.49146	0.855392	0.000821706	MANF	0.01497	1	880	GroupHCHWA_D	0.514019	963	6
9.29561	0.855241	0.0511573	MARCKS	0.177908	0	4610	GroupHCHWA_D	0.437993	4306	3
4.0994	0.855026	0.0181609	HK2	0.0945561	0	3079	GroupHCHWA_D	0.512618	7093	6
2.58714	0.854946	0.0427148	PARVG	0.160413	0	4269	GroupHCHWA_D	0.574089	3759	7
4.90888	0.854918	0.0210124	CYP1B1	0.102893	0	3274	GroupHCHWA_D	0.444703	5154	3
1.57565	0.854536	0.0327124	RPL21P44	0.136081	0	3853	GroupHCHWA_D	0.429933	1784	3
2.34653	0.854207	0.038903	ANXA2P2	0.151566	0	4115	GroupHCHWA_D	0.49771	1310	5
2.12699	0.853406	0.03473	SLC22A4	0.140666	0	3957	GroupHCHWA_D	0.501369	2192	5
1.32671	0.853364	0.0337711	GALNTL5	0.138399	0	3912	GroupHCHWA_D	0.409778	1984	2
0.934889	0.853142	0.05211	PTX3	0.179933	0	4643	GroupHCHWA_D	0.474716	1938	4
2.75035	0.853046	0.00142885	LINC00997	0.0208213	1	1100	GroupHCHWA_D	0.435223	4639	3
4.21026	0.852463	0.00224601	TAF1D	0.0280766	1	1282	GroupHCHWA_D	0.390076	1310	1
3.32223	0.852223	0.010412	ASMTL-AS1	0.0669308	0	2494	GroupHCHWA_D	0.580378	6034	8
1.81355	0.852213	0.0211218	WDR62	0.103114	0	3284	GroupHCHWA_D	0.603793	4745	8
5.00594	0.852119	0.000440814	MXD1	0.0103928	1	680	GroupHCHWA_D	0.428241	5616	3
0.309762	0.851594	0.120448	GZMM	0.29832	0	6473	GroupHCHWA_D	0.668438	941	9
4.79049	0.850105	5.23662e-05	FYCO1	0.00297708	1	282	GroupHCHWA_D	0.532989	8518	6
3.41728	0.850011	0.029312	DHFR	0.126775	0	3706	GroupHCHWA_D	0.448047	3917	3
4.70262	0.849502	0.000280272	NUDT9	0.00811259	1	553	GroupHCHWA_D	0.428977	2816	3
3.39831	0.849198	2.40911e-05	ADPRHL1	0.00194084	1	199	GroupHCHWA_D	0.555096	2178	7
3.91143	0.849169	0.028887	OSMR	0.125829	0	3680	GroupHCHWA_D	0.450626	6147	4
2.47968	0.848423	0.00402936	CHRAC1	0.0385514	1	1674	GroupHCHWA_D	0.445447	2548	3
6.78058	0.848317	1.36731e-05	CMIP	0.00138502	1	158	GroupHCHWA_D	0.550844	4504	7
1.32004	0.84825	0.0505186	SLC10A5	0.176721	0	4583	GroupHCHWA_D	0.373576	1317	1
2.83107	0.847657	0.000429583	GPR146	0.0102758	1	670	GroupHCHWA_D	0.6055	2218	8
2.19496	0.847521	0.00699402	PDIA5	0.0529656	0	2117	GroupHCHWA_D	0.523093	1862	6
2.57042	0.847313	0.0302659	LOC100505715	0.129427	0	3749	GroupHCHWA_D	0.388864	2191	1
3.33651	0.846811	0.00141526	ANTXR2	0.0207021	1	1096	GroupHCHWA_D	0.412851	8233	2
3.08661	0.846357	0.013897	BTG3	0.0799125	0	2788	GroupHCHWA_D	0.490009	2302	5
2.02552	0.846265	0.00671395	DBX2	0.0516745	0	2083	GroupHCHWA_D	0.461793	2722	4
2.16984	0.845526	0.0193832	PLCG1-AS1	0.0982147	0	3164	GroupHCHWA_D	0.460424	1794	4
1.99811	0.845234	0.0128292	DPY19L2P4	0.0760845	0	2703	GroupHCHWA_D	0.380079	2018	1
1.31261	0.845022	0.0568084	AATBC	0.189828	0	4797	GroupHCHWA_D	0.61418	4598	8
1.71582	0.84443	0.0414279	ADCY10	0.157836	0	4208	GroupHCHWA_D	0.439203	5469	3
1.79647	0.843726	0.0444927	LOC399715	0.163912	0	4349	GroupHCHWA_D	0.480782	2966	5
1.12163	0.842699	0.0426699	PRRG4	0.160357	0	4266	GroupHCHWA_D	0.391477	5538	1
2.15818	0.842636	0.0366951	LOC148696	0.146233	0	4023	GroupHCHWA_D	0.523234	4218	6
2.33106	0.842141	0.0268873	LOC652276	0.120306	0	3583	GroupHCHWA_D	0.533161	2714	6
2.01974	0.840454	0.0314802	PTHLH	0.132918	0	3797	GroupHCHWA_D	0.42213	2639	2
3.33503	0.840152	0.0243298	MRPS6	0.112765	0	3459	GroupHCHWA_D	0.488889	990	5
4.96406	0.840028	0.0539983	YBX3	0.184415	0	4693	GroupHCHWA_D	0.544073	1974	7
2.45947	0.839777	0.0261252	AMH	0.118016	0	3549	GroupHCHWA_D	0.72002	2018	9
1.02764	0.839702	0.0409821	SLC22A13	0.156473	0	4198	GroupHCHWA_D	0.566797	2560	7
4.33829	0.839158	0.00128742	RNF144B	0.0195769	1	1052	GroupHCHWA_D	0.422558	5036	3
5.0374	0.838465	0.000311735	CCDC117	0.00851402	1	587	GroupHCHWA_D	0.420304	4078	2
2.25162	0.838433	0.00277081	TMEM51	0.0312349	1	1422	GroupHCHWA_D	0.562109	2238	7
2.03247	0.838257	0.00831691	PROSER3	0.0585838	0	2276	GroupHCHWA_D	0.601118	2146	8
5.76479	0.837823	0.00395483	EMX2OS	0.0383337	1	1654	GroupHCHWA_D	0.495194	7282	5
5.451	0.837387	1.93125e-05	MNT	0.00169191	1	183	GroupHCHWA_D	0.611937	4842	8
3.95364	0.837033	5.43526e-05	RBM48	0.00305748	1	285	GroupHCHWA_D	0.413512	1717	2
5.24015	0.836675	0.119557	ANGPTL4	0.296938	0	6455	GroupHCHWA_D	0.633071	1905	9
0.490221	0.836496	0.0320588	FLJ42393	0.134476	0	3822	GroupHCHWA_D	0.473963	2266	4
5.50364	0.836253	3.73636e-05	NOVA2	0.00247526	1	242	GroupHCHWA_D	0.66862	1877	9
3.63649	0.836167	0.00353185	TNFRSF10B	0.0357466	1	1584	GroupHCHWA_D	0.500361	4151	5
0.887012	0.836155	0.028588	FLT3LG	0.12502	0	3666	GroupHCHWA_D	0.620603	1194	9
1.79574	0.835935	0.011755	INO80C	0.0722887	0	2607	GroupHCHWA_D	0.50974	1232	6
5.10593	0.835505	0.000352385	RBM14	0.00901027	1	627	GroupHCHWA_D	0.531348	5407	6
3.24663	0.834994	0.0100624	PRKD2	0.0655373	0	2461	GroupHCHWA_D	0.622449	3920	9
3.01376	0.834743	0.0238662	FERMT3	0.11139	0	3435	GroupHCHWA_D	0.615596	2552	8
1.40373	0.834309	0.0522485	SLC17A9	0.180139	0	4650	GroupHCHWA_D	0.617558	2654	9
5.05674	0.833975	3.69255e-05	PML	0.00246662	1	240	GroupHCHWA_D	0.583463	7704	8
7.21633	0.833756	5.37498e-06	MAPK4	0.000689374	1	125	GroupHCHWA_D	0.555954	4736	7
3.2593	0.833499	0.00684363	BAG2	0.052321	0	2097	GroupHCHWA_D	0.437622	2052	3
2.85369	0.833419	0.015184	LOC101927181	0.0846419	0	2876	GroupHCHWA_D	0.576197	2067	7
1.9159	0.833129	0.0289143	BHMT2	0.125829	0	3684	GroupHCHWA_D	0.47567	2651	4
5.86397	0.833079	0.00233675	CHSY1	0.0286542	1	1307	GroupHCHWA_D	0.497802	4550	5
3.18964	0.832667	0.0176047	SH3RF3-AS1	0.0925982	0	3048	GroupHCHWA_D	0.643266	2792	9
3.68101	0.832516	0.000294937	MTHFD2L	0.00832295	1	567	GroupHCHWA_D	0.369648	2359	1
4.20967	0.831984	0.000295815	UBXN2A	0.00832295	1	569	GroupHCHWA_D	0.407818	1893	2
3.6644	0.831589	0.0236292	PNP	0.110541	0	3427	GroupHCHWA_D	0.481619	2421	5
5.37721	0.831552	0.00449451	CNIH2	0.0410809	1	1754	GroupHCHWA_D	0.65123	1382	9
2.68711	0.831468	0.000509944	SMIM3	0.0113233	1	722	GroupHCHWA_D	0.523993	2334	6
0.427336	0.831374	0.0581216	NTM-IT	0.192283	0	4846	GroupHCHWA_D	0.51178	764	6
7.46251	0.830731	9.67543e-05	CLIP3	0.0042037	1	369	GroupHCHWA_D	0.586273	3628	8
4.54478	0.830368	0.00025664	C22orf46	0.00770496	1	534	GroupHCHWA_D	0.52804	4975	6
7.03123	0.830239	2.75378e-05	HNRNPH1	0.00210231	1	210	GroupHCHWA_D	0.434934	2290	3
8.04155	0.830137	5.37343e-06	ANKRD11	0.000689374	1	124	GroupHCHWA_D	0.571764	10207	7
1.08822	0.830058	0.0207864	RPS6KA2-IT1	0.102123	0	3262	GroupHCHWA_D	0.557858	579	7
5.64078	0.82929	5.69738e-05	MSL2	0.00316057	1	289	GroupHCHWA_D	0.427044	4770	3
4.3514	0.829037	0.0425443	CD22	0.160111	0	4260	GroupHCHWA_D	0.550531	3295	7
1.32236	0.828509	0.0267961	PSMD6-AS2	0.120069	0	3577	GroupHCHWA_D	0.411142	2549	2
1.55469	0.828336	0.0188117	LINC01481	0.0963756	0	3129	GroupHCHWA_D	0.445855	1339	3
3.44957	0.828068	0.000323404	TRAF3IP2	0.00868479	1	597	GroupHCHWA_D	0.465629	6488	4
1.55293	0.828022	0.0867851	TNFRSF11B	0.244825	0	5682	GroupHCHWA_D	0.419011	2346	2
3.92282	0.82793	0.000705079	THAP2	0.0136932	1	824	GroupHCHWA_D	0.342149	4840	1
1.8984	0.827918	0.0584961	ARHGAP5-AS1	0.193047	0	4857	GroupHCHWA_D	0.473849	1281	4
3.60662	0.827806	0.0049305	SHE	0.0433128	1	1825	GroupHCHWA_D	0.450914	6183	4
3.43768	0.827459	0.00415862	SHKBP1	0.0393467	1	1694	GroupHCHWA_D	0.623679	2365	9
4.59772	0.827271	0.000976797	HMGN1	0.0167666	1	934	GroupHCHWA_D	0.45092	1304	4
6.20798	0.827003	7.37797e-06	SRRT	0.000869732	1	136	GroupHCHWA_D	0.58361	3014	8
5.03343	0.826695	0.024819	AP1G2	0.114207	0	3484	GroupHCHWA_D	0.58497	2954	8
3.90851	0.826595	0.00295384	LONRF3	0.0325024	1	1457	GroupHCHWA_D	0.531304	4041	6
0.989419	0.82629	0.0186448	CTRL	0.0959782	0	3114	GroupHCHWA_D	0.571912	1182	7
1.09725	0.825673	0.079281	INE1	0.23217	0	5474	GroupHCHWA_D	0.510913	1008	6
3.2304	0.825525	0.0155506	LOC440311	0.0861166	0	2895	GroupHCHWA_D	0.606345	1702	8
2.43403	0.825243	0.00583154	MFI2-AS1	0.0477987	1	1955	GroupHCHWA_D	0.615142	951	8
3.53855	0.824432	0.00322263	PLEKHF2	0.0339622	1	1519	GroupHCHWA_D	0.384823	2965	1
7.63382	0.824002	0.00368195	CACNG8	0.0368012	1	1604	GroupHCHWA_D	0.561422	8751	7
6.16154	0.823765	0.000225516	ZC3H18	0.00711706	1	508	GroupHCHWA_D	0.584101	3799	8
4.06251	0.823723	4.89775e-05	LIME1	0.00289744	1	271	GroupHCHWA_D	0.676391	1851	9
7.89391	0.823694	2.33916e-05	PIP5K1C	0.00190363	1	197	GroupHCHWA_D	0.640144	6108	9
2.00043	0.823329	0.0186135	UBE2Q2P2	0.0958906	0	3112	GroupHCHWA_D	0.417485	3054	2
5.78119	0.822743	0.00115824	NFKBIA	0.0184323	1	1007	GroupHCHWA_D	0.530951	1567	6
5.35406	0.822653	0.0175201	KLF15	0.0924152	0	3039	GroupHCHWA_D	0.60198	2525	8
2.81093	0.822269	0.017325	PPAPDC1A	0.0918805	0	3023	GroupHCHWA_D	0.571335	1521	7
6.46013	0.822182	0.00334305	ZDHHC2	0.034587	1	1549	GroupHCHWA_D	0.394068	4012	1
1.60231	0.822062	0.0935207	NEXN	0.256654	0	5841	GroupHCHWA_D	0.381528	3389	1
4.14458	0.821669	0.00455845	SNAPC2	0.0414554	1	1762	GroupHCHWA_D	0.639218	1688	9
2.20649	0.821647	0.0150531	GJA4	0.0841439	0	2867	GroupHCHWA_D	0.608508	1622	8
4.39411	0.821497	0.000490161	RELA	0.0110836	1	709	GroupHCHWA_D	0.591156	2578	8
2.5276	0.819758	0.00118255	DUSP18	0.0186052	1	1019	GroupHCHWA_D	0.511829	3466	6
2.04889	0.81928	0.0695948	RGS9BP	0.214579	0	5198	GroupHCHWA_D	0.61783	2894	9
3.70047	0.818985	0.00341581	EMX2	0.0350324	1	1562	GroupHCHWA_D	0.520028	2896	6
3.70124	0.818633	0.000513087	LMAN2L	0.0113485	1	724	GroupHCHWA_D	0.510238	2442	6
1.70399	0.818434	0.0652901	SNORA49	0.206293	0	5074	GroupHCHWA_D	0.481752	137	5
2.04379	0.818364	0.0142257	AP1S3	0.0808457	0	2821	GroupHCHWA_D	0.398911	4041	2
5.56123	0.818364	0.001584	PLOD1	0.0222956	1	1139	GroupHCHWA_D	0.592214	3031	8
4.14585	0.818308	0.0924144	MIR5047	0.254656	0	5818	GroupHCHWA_D	0.48	100	5
2.48994	0.817699	0.0335227	ZBTB8B	0.137663	0	3904	GroupHCHWA_D	0.478596	4018	5
0.650009	0.817646	0.118069	CARD8-AS1	0.295138	0	6412	GroupHCHWA_D	0.385125	1963	1
2.27123	0.817487	0.00401413	SLC43A1	0.0385514	1	1666	GroupHCHWA_D	0.585449	2639	8
5.13522	0.817017	2.79438e-05	TMOD3	0.00211319	1	212	GroupHCHWA_D	0.383626	4666	1
2.83107	0.816781	0.0189664	FAS	0.0968372	0	3140	GroupHCHWA_D	0.403124	2689	2
0.680009	0.816187	0.0546113	FAM106B	0.185533	0	4719	GroupHCHWA_D	0.440023	1759	3
1.3361	0.815953	0.0433554	LINC01503	0.161399	0	4306	GroupHCHWA_D	0.566489	752	7
2.14746	0.81582	0.0720705	ISG20	0.218832	0	5280	GroupHCHWA_D	0.537333	3884	6
1.50302	0.815814	0.0077361	LOC100505942	0.0562728	0	2204	GroupHCHWA_D	0.569883	1109	7
0.673036	0.815613	0.0990258	LOC100507424	0.266686	0	5953	GroupHCHWA_D	0.475485	877	4
2.2089	0.815278	0.0213157	PYROXD2	0.103677	0	3295	GroupHCHWA_D	0.569976	2065	7
3.30615	0.815083	0.00149522	RFXAP	0.0214152	1	1118	GroupHCHWA_D	0.425841	2825	3
2.9303	0.814646	0.0544992	TNFAIP3	0.185273	0	4715	GroupHCHWA_D	0.494512	4738	5
1.08969	0.814514	0.0331424	PRICKLE3	0.136731	0	3886	GroupHCHWA_D	0.594669	2889	8
5.09091	0.814508	0.00188605	KLF6	0.025093	1	1205	GroupHCHWA_D	0.459459	4662	4
2.13384	0.814055	0.0531559	LOC100505635	0.182093	0	4680	GroupHCHWA_D	0.508271	665	6
1.5837	0.813752	0.275015	HIST1H1B	0.48479	0	9094	GroupHCHWA_D	0.578481	790	8
1.58787	0.813727	0.00523774	LINC01354	0.0449766	1	1867	GroupHCHWA_D	0.445455	2860	3
3.25127	0.812048	0.0435991	LOC644285	0.161906	0	4316	GroupHCHWA_D	0.441312	5214	3
2.18738	0.811826	0.0302962	AKR1C3	0.129488	0	3751	GroupHCHWA_D	0.436869	1980	3
8.3856	0.811082	1.59593e-05	SRRM2	0.00152297	1	168	GroupHCHWA_D	0.562279	9353	7
3.05407	0.810377	0.00998973	ZSWIM8-AS1	0.0651918	0	2456	GroupHCHWA_D	0.54863	1460	7
3.36515	0.810021	0.00616896	RNF208	0.0491736	1	2010	GroupHCHWA_D	0.668524	1077	9
0.843205	0.809714	0.0318713	SERPINI2	0.13404	0	3812	GroupHCHWA_D	0.355568	1769	1
7.0031	0.809642	0.000291967	NFIC	0.00829852	1	564	GroupHCHWA_D	0.593168	8168	8
3.63163	0.809366	2.83543e-05	NXN	0.00212871	1	213	GroupHCHWA_D	0.598206	3121	8
6.57355	0.809305	0.00102792	SART1	0.0172975	1	950	GroupHCHWA_D	0.596223	3601	8
3.55253	0.809009	0.0122105	C15orf52	0.0738816	0	2648	GroupHCHWA_D	0.57706	5327	8
3.19886	0.808864	0.0536115	PCDHA10	0.183419	0	4686	GroupHCHWA_D	0.472606	5567	4
2.57063	0.8087	0.00460335	LOC100506730	0.0416955	1	1770	GroupHCHWA_D	0.433735	2490	3
6.98712	0.808426	0.00916572	PTN	0.0620544	0	2368	GroupHCHWA_D	0.430052	1544	3
2.23863	0.808329	0.0323081	LINC01250	0.135062	0	3835	GroupHCHWA_D	0.453072	2344	4
1.85637	0.807425	0.0267656	TEAD3	0.119996	0	3576	GroupHCHWA_D	0.598128	2991	8
3.8261	0.806426	0.000116997	FKBP14	0.00466592	1	402	GroupHCHWA_D	0.391069	5173	1
4.41131	0.805977	0.000937889	LOC220729	0.0163793	1	918	GroupHCHWA_D	0.48461	1527	5
5.08196	0.805781	0.08283	THBS1	0.23814	0	5576	GroupHCHWA_D	0.460657	7244	4
2.92936	0.805434	0.00423048	NKX2-2	0.0397298	1	1706	GroupHCHWA_D	0.573077	2080	7
3.7546	0.80535	0.00523461	ERICH1	0.0449739	1	1866	GroupHCHWA_D	0.479497	3658	5
3.3587	0.805131	0.00673259	SLC12A8	0.0516863	0	2088	GroupHCHWA_D	0.519203	3515	6
4.90958	0.804487	0.00344944	PPP1R18	0.0352463	1	1569	GroupHCHWA_D	0.612094	33307	8
2.52314	0.804388	0.0083213	ZNF765	0.0585889	0	2277	GroupHCHWA_D	0.396111	4577	2
1.6667	0.804255	0.0708965	ZC3H12A	0.216952	0	5239	GroupHCHWA_D	0.61377	2716	8
8.25557	0.804074	0.0146667	EIF3A	0.0824752	0	2851	GroupHCHWA_D	0.445806	5305	3
1.6216	0.803281	0.128073	HSD11B2	0.308947	0	6646	GroupHCHWA_D	0.6339	1882	9
5.35359	0.802843	0.0010556	SMAD7	0.0175381	1	964	GroupHCHWA_D	0.554878	3444	7
4.58396	0.80277	0.000879934	FRA10AC1	0.0157445	1	896	GroupHCHWA_D	0.379411	3089	1
4.08939	0.802663	0.0106593	SERTAD2	0.0678137	0	2520	GroupHCHWA_D	0.439438	5548	3
2.7361	0.802343	0.00369443	RIPK2	0.0368719	1	1606	GroupHCHWA_D	0.425919	2585	3
1.07566	0.801829	0.0563749	LOC643923	0.188804	0	4787	GroupHCHWA_D	0.5	972	5
2.7574	0.80148	0.045754	C8orf4	0.166977	0	4393	GroupHCHWA_D	0.361217	1841	1
2.33903	0.801283	0.00805624	MURC	0.0573976	0	2250	GroupHCHWA_D	0.409884	3096	2
2.50836	0.801061	0.0917432	FAM66A	0.253416	0	5804	GroupHCHWA_D	0.633548	775	9
5.54692	0.801024	0.00216777	ARF6	0.0274083	1	1268	GroupHCHWA_D	0.432597	3939	3
2.03176	0.800735	0.0178613	ERICH1-AS1	0.0935487	0	3061	GroupHCHWA_D	0.547993	1719	7
8.32701	0.800706	0.0496945	SPP1	0.175161	0	4546	GroupHCHWA_D	0.417861	1814	2
1.46816	0.800396	0.0203913	TTLL9	0.10124	0	3228	GroupHCHWA_D	0.565028	1607	7
2.00229	0.800272	0.0319584	STXBP2	0.13429	0	3815	GroupHCHWA_D	0.608871	1984	8
2.96694	0.799952	0.000197557	PPAPDC1B	0.00654388	1	484	GroupHCHWA_D	0.428952	2625	3
2.39337	0.799947	0.0105917	TMEM81	0.0676249	0	2511	GroupHCHWA_D	0.475225	1332	4
1.49556	0.799857	0.0179021	OVCH1	0.0936095	0	3066	GroupHCHWA_D	0.445906	3420	3
5.81523	0.799847	0.0299482	CPOX	0.12848	0	3737	GroupHCHWA_D	0.465855	2709	4
5.00363	0.799755	0.00672623	SESN2	0.0516863	0	2084	GroupHCHWA_D	0.598073	3528	8
4.00031	0.799643	0.00178754	FGD5	0.0242136	1	1183	GroupHCHWA_D	0.544175	5897	7
2.86246	0.799497	0.0148745	SNRPF	0.0834421	0	2857	GroupHCHWA_D	0.374055	794	1
8.84493	0.79942	0.000944504	FBXL16	0.0164233	1	922	GroupHCHWA_D	0.655659	3543	9
1.97901	0.799324	0.0333558	CNKSR1	0.137329	0	3894	GroupHCHWA_D	0.601877	2557	8
2.59596	0.798886	0.0202164	TMEM200B	0.100749	0	3217	GroupHCHWA_D	0.596713	2616	8
8.79555	0.798702	0.000850411	HNRNPU	0.0153017	1	891	GroupHCHWA_D	0.417616	6846	2
1.10732	0.798369	0.0172002	NAGPA-AS1	0.0914932	0	3013	GroupHCHWA_D	0.551334	1237	7
1.30555	0.798255	0.0387474	SLFNL1	0.15107	0	4112	GroupHCHWA_D	0.614385	2155	8
8.24443	0.798054	1.71759e-05	NCOR2	0.00156759	1	175	GroupHCHWA_D	0.653305	8881	9
4.41178	0.797811	0.0159048	S100A16	0.0873977	0	2917	GroupHCHWA_D	0.572097	1068	7
5.11162	0.797577	0.00276476	DNAJB11	0.0312145	1	1420	GroupHCHWA_D	0.464222	1691	4
1.7143	0.797272	0.0422173	TMEM9B-AS1	0.159529	0	4241	GroupHCHWA_D	0.552707	1053	7
6.92679	0.797241	0.0937772	JUNB	0.257129	0	5847	GroupHCHWA_D	0.65033	1816	9
2.24568	0.797133	0.0424412	SMG1P7	0.159872	0	4256	GroupHCHWA_D	0.50238	1891	5
1.69202	0.797068	0.00889098	ZNF890P	0.0609203	0	2339	GroupHCHWA_D	0.584263	1614	8
2.00351	0.796967	0.0190257	ADA	0.0970472	0	3143	GroupHCHWA_D	0.577023	1532	8
6.29443	0.7969	0.0093919	TMEM47	0.0630268	0	2389	GroupHCHWA_D	0.391712	4054	1
2.15494	0.796557	0.0748176	CA12	0.224327	0	5347	GroupHCHWA_D	0.50986	4209	6
2.48385	0.796286	0.0681814	TMPO-AS1	0.212003	0	5156	GroupHCHWA_D	0.478962	3161	5
0.647089	0.795904	0.0660381	LINC01372	0.207633	0	5099	GroupHCHWA_D	0.490835	491	5
5.11207	0.795701	2.18548e-05	RPL28	0.00185384	1	189	GroupHCHWA_D	0.554312	5183	7
1.95844	0.795382	0.00557019	PPP1R13L	0.0466587	1	1913	GroupHCHWA_D	0.657961	3178	9
2.93029	0.793393	0.0218453	CATSPER2	0.105362	0	3324	GroupHCHWA_D	0.475435	1954	4
2.97635	0.793235	0.151044	RNU4-2	0.340247	0	7117	GroupHCHWA_D	0.453901	141	4
0.681317	0.792809	0.156734	GPRC5A	0.348168	0	7217	GroupHCHWA_D	0.547527	2851	7
5.09439	0.792629	2.51777e-05	NPAS2	0.00198567	1	202	GroupHCHWA_D	0.531469	4004	6
1.19792	0.792572	0.0389554	CASP6	0.151654	0	4118	GroupHCHWA_D	0.435882	1661	3
2.15927	0.792517	0.00473045	LSM12	0.0424153	1	1788	GroupHCHWA_D	0.450886	2484	4
3.36358	0.791771	0.305425	TXLNGY	0.516299	0	9484	GroupHCHWA_D	0.355582	4989	1
6.46308	0.790911	0.0508126	TP53INP2	0.177281	0	4595	GroupHCHWA_D	0.560621	4124	7
5.52609	0.790858	0.0012211	STK40	0.0190992	1	1025	GroupHCHWA_D	0.588642	3909	8
4.03374	0.790554	0.00069841	ZNF785	0.0136881	1	818	GroupHCHWA_D	0.561715	3265	7
8.00085	0.790321	0.000542082	FTH1	0.0117283	1	741	GroupHCHWA_D	0.501221	1229	5
3.30703	0.789876	0.0267969	GALNTL6	0.120069	0	3578	GroupHCHWA_D	0.506845	2849	5
5.36737	0.789845	0.00154099	NOM1	0.021863	1	1130	GroupHCHWA_D	0.473589	6077	4
7.868	0.789703	0.000426445	DNAJA1	0.0102654	1	666	GroupHCHWA_D	0.452536	1538	4
2.67892	0.789623	0.00447213	FAM196A	0.0410167	1	1748	GroupHCHWA_D	0.454731	4407	4
3.02022	0.789585	0.0022469	MAPT-IT1	0.0280766	1	1283	GroupHCHWA_D	0.554915	9023	7
3.14244	0.789371	0.0501228	FTCD	0.175869	0	4569	GroupHCHWA_D	0.651537	3415	9
4.8765	0.789011	0.00146257	LOC653513	0.0210862	1	1112	GroupHCHWA_D	0.465517	1740	4
5.65493	0.78884	0.0330964	MIDN	0.136718	0	3881	GroupHCHWA_D	0.625626	3793	9
4.54657	0.78756	0.00639822	EFNA3	0.0500372	0	2050	GroupHCHWA_D	0.613917	1782	8
12.6904	0.787539	0.00210562	MALAT1	0.027015	1	1249	GroupHCHWA_D	0.402925	8751	2
1.84339	0.787095	0.0392761	LOC100190986	0.152537	0	4128	GroupHCHWA_D	0.447898	7303	3
3.04133	0.786049	0.0706396	SIK1	0.216489	0	5231	GroupHCHWA_D	0.573054	9404	7
3.12998	0.785531	0.000442219	MPLKIP	0.0103997	1	681	GroupHCHWA_D	0.493092	941	5
4.41686	0.784994	0.0197205	FABP7	0.0992962	0	3184	GroupHCHWA_D	0.431431	999	3
4.77579	0.784848	0.01893	FBLN1	0.0967133	0	3138	GroupHCHWA_D	0.563311	4857	7
1.99344	0.784708	0.021702	FGF5	0.104955	0	3315	GroupHCHWA_D	0.382224	5693	1
7.04646	0.784491	0.0189643	GATM	0.0968372	0	3139	GroupHCHWA_D	0.449343	2586	4
3.99534	0.784367	0.000128556	ZNF273	0.00495436	1	416	GroupHCHWA_D	0.345265	4414	1
2.50984	0.784294	0.041637	MYH3	0.158067	0	4223	GroupHCHWA_D	0.51739	6038	6
2.84138	0.784124	0.136085	SNORD116-4	0.318777	0	6844	GroupHCHWA_D	0.44898	98	4
5.53948	0.783861	0.00152488	DMPK	0.0217112	1	1126	GroupHCHWA_D	0.633468	3705	9
3.54139	0.783799	0.00741992	MORC4	0.0548438	0	2169	GroupHCHWA_D	0.467397	3834	4
2.00283	0.78266	0.0321556	HSPB6	0.134635	0	3829	GroupHCHWA_D	0.627397	1460	9
3.27811	0.782628	0.00173906	FAM133B	0.0236477	1	1179	GroupHCHWA_D	0.389034	2681	1
2.05922	0.782428	0.0482936	SULT1C4	0.172525	0	4487	GroupHCHWA_D	0.423077	1664	3
5.36789	0.782151	0.00199771	PPTC7	0.0261055	1	1226	GroupHCHWA_D	0.444504	3748	3
4.25666	0.781578	0.0142199	FSTL3	0.0808457	0	2819	GroupHCHWA_D	0.64317	2511	9
1.48794	0.781564	0.0249497	RAD54L	0.114592	0	3490	GroupHCHWA_D	0.53274	3146	6
4.0716	0.781393	0.00106042	FAM173B	0.0175664	1	967	GroupHCHWA_D	0.415711	2966	2
3.33756	0.781383	0.0102976	LOC100288637	0.0664349	0	2485	GroupHCHWA_D	0.46192	22991	4
0.994642	0.781179	0.0580992	FAM133CP	0.192249	0	4845	GroupHCHWA_D	0.359667	2519	1
8.26248	0.781012	0.00272707	PCNT	0.0309153	1	1414	GroupHCHWA_D	0.559754	10560	7
4.43708	0.780578	0.0130233	HRH1	0.0769969	0	2711	GroupHCHWA_D	0.462017	4818	4
5.91103	0.78044	0.000343501	HNRNPA0	0.00893527	1	616	GroupHCHWA_D	0.485339	2967	5
2.86127	0.780272	0.036541	LOC100129148	0.1458	0	4018	GroupHCHWA_D	0.482609	460	5
3.09849	0.780167	0.0174712	LRRC61	0.09232	0	3034	GroupHCHWA_D	0.637799	1963	9
4.70328	0.779535	0.000588497	CFAP44	0.012304	1	766	GroupHCHWA_D	0.413986	10539	2
2.79831	0.779433	0.0164117	LOC400706	0.0892208	0	2949	GroupHCHWA_D	0.462802	3226	4
9.07935	0.77943	0.0151266	NEFM	0.0844099	0	2873	GroupHCHWA_D	0.530742	3627	6
3.71012	0.779376	0.00329559	PAPSS2	0.0342195	1	1544	GroupHCHWA_D	0.452825	3858	4
5.78643	0.779362	0.000414686	ANXA5	0.0101191	1	657	GroupHCHWA_D	0.442151	1599	3
4.44518	0.7793	0.00497974	ARX	0.0436496	1	1829	GroupHCHWA_D	0.628045	2874	9
3.53044	0.77923	0.00634951	ARHGAP42	0.0498264	1	2043	GroupHCHWA_D	0.382365	4752	1
6.18379	0.779153	0.0117712	PPP2R5A	0.0723606	0	2608	GroupHCHWA_D	0.452123	3415	4
4.47637	0.779077	6.46194e-05	GFPT2	0.00335923	1	307	GroupHCHWA_D	0.515443	3011	6
6.92807	0.779054	0.0126503	PNISR	0.0755898	0	2683	GroupHCHWA_D	0.409811	3221	2
0.717346	0.778814	0.0670548	ST3GAL6-AS1	0.209679	0	5127	GroupHCHWA_D	0.498049	769	5
1.47639	0.778702	0.0336938	ZC3HAV1L	0.138153	0	3910	GroupHCHWA_D	0.500856	1753	5
8.47117	0.778628	0.00628859	ITPKB	0.0495235	1	2035	GroupHCHWA_D	0.579844	6162	8
1.42225	0.778616	0.0273285	GAR1	0.121635	0	3602	GroupHCHWA_D	0.474349	1267	4
3.80802	0.778296	0.00298085	MMP14	0.0326654	1	1462	GroupHCHWA_D	0.591541	3594	8
3.86955	0.777309	0.00951369	SYDE2	0.0635779	0	2399	GroupHCHWA_D	0.434303	4711	3
1.57321	0.776793	0.00873237	CD40	0.0602703	0	2322	GroupHCHWA_D	0.528993	1828	6
1.12834	0.776776	0.0282828	HACD4	0.124166	0	3651	GroupHCHWA_D	0.385593	1416	1
5.57263	0.776604	0.00386647	TGM2	0.0377971	1	1640	GroupHCHWA_D	0.576358	4086	8
1.45622	0.775468	0.0419721	NRG1-IT1	0.158852	0	4236	GroupHCHWA_D	0.422222	630	3
6.99297	0.774592	0.000826787	TRIM8	0.0149944	1	884	GroupHCHWA_D	0.594388	2744	8
2.4502	0.774469	0.0208976	ITGB3BP	0.102518	0	3268	GroupHCHWA_D	0.404762	1176	2
5.7972	0.774468	0.000205482	PPP4R2	0.00668212	1	493	GroupHCHWA_D	0.411081	1462	2
8.32051	0.774467	0.00272862	KIF1C	0.0309153	1	1415	GroupHCHWA_D	0.549198	7917	7
3.42235	0.774314	0.0564935	EMILIN2	0.189122	0	4789	GroupHCHWA_D	0.566226	4009	7
5.27451	0.774189	0.00150866	ENGASE	0.0215185	1	1124	GroupHCHWA_D	0.612595	4494	8
1.53848	0.773899	0.301094	CXCL1	0.512164	0	9425	GroupHCHWA_D	0.456376	1192	4
5.12797	0.773646	0.00490882	FOXJ2	0.0432435	1	1819	GroupHCHWA_D	0.510215	5482	6
2.75151	0.773127	0.0116098	ATF5	0.0718642	0	2590	GroupHCHWA_D	0.587942	2604	8
5.73271	0.772943	0.016769	GRAMD3	0.0902223	0	2979	GroupHCHWA_D	0.450512	3516	4
3.38065	0.77233	0.00631139	HIATL2	0.0496244	1	2039	GroupHCHWA_D	0.599237	786	8
3.35068	0.771769	0.00954553	SFT2D2	0.0636845	0	2403	GroupHCHWA_D	0.474299	856	4
1.8022	0.771618	0.0373338	BCL3	0.147787	0	4050	GroupHCHWA_D	0.663627	1864	9
1.70661	0.771387	0.0375486	LOC100335030	0.148417	0	4056	GroupHCHWA_D	0.376582	3160	1
6.39973	0.771275	0.000511763	SCARA3	0.011348	1	723	GroupHCHWA_D	0.578288	3832	8
6.2739	0.771138	0.0213196	FGF2	0.103677	0	3296	GroupHCHWA_D	0.374815	6774	1
4.52656	0.770606	0.000205234	ETV6	0.00668212	1	492	GroupHCHWA_D	0.473737	5978	4
1.55502	0.770596	0.0375362	ALOX12-AS1	0.148404	0	4055	GroupHCHWA_D	0.474654	651	4
4.81019	0.770241	0.000891659	SNRNP27	0.0158834	1	900	GroupHCHWA_D	0.381085	1438	1
0.969256	0.769615	0.100536	PIK3R6	0.268826	0	5994	GroupHCHWA_D	0.58193	3564	8
1.64556	0.769372	0.0270965	SLC16A1-AS1	0.120954	0	3591	GroupHCHWA_D	0.539229	1504	6
3.60024	0.769365	0.00225951	AVEN	0.0281246	1	1288	GroupHCHWA_D	0.536251	1531	6
7.24648	0.768985	0.0149887	HOMER1	0.0839031	0	2864	GroupHCHWA_D	0.397959	4312	2
3.40879	0.76876	0.0598255	LMOD1	0.195492	0	4905	GroupHCHWA_D	0.550038	3967	7
3.5535	0.768728	0.00700479	FZD8	0.0529683	0	2119	GroupHCHWA_D	0.616133	3186	9
1.98645	0.768421	0.0172769	RBM47	0.0917467	0	3019	GroupHCHWA_D	0.469131	5248	4
2.57182	0.768021	0.111504	PLK5	0.285746	0	6256	GroupHCHWA_D	0.661148	1933	9
3.03164	0.76796	0.0031581	CSTB	0.0335081	1	1511	GroupHCHWA_D	0.52766	940	6
6.71099	0.767884	0.00171077	MSN	0.023442	1	1170	GroupHCHWA_D	0.503275	3970	5
1.8623	0.767142	0.0990966	PNLDC1	0.266742	0	5956	GroupHCHWA_D	0.50541	1941	5
2.0199	0.766848	0.00554587	RRAS	0.0465748	1	1909	GroupHCHWA_D	0.634888	986	9
3.0019	0.766763	0.0112002	ITGA10	0.070196	0	2558	GroupHCHWA_D	0.53198	5269	6
2.37521	0.766505	0.0098809	EBF1	0.0647525	0	2446	GroupHCHWA_D	0.411787	5277	2
0.152795	0.766019	0.156911	PSPN	0.348313	0	7222	GroupHCHWA_D	0.713376	471	9
3.46799	0.765839	0.0207362	PRKCD	0.102123	0	3254	GroupHCHWA_D	0.55485	2835	7
1.15655	0.765675	0.0342817	RPL13P5	0.139636	0	3935	GroupHCHWA_D	0.570513	624	7
4.03457	0.765327	0.000306036	ZCCHC8	0.0084302	1	582	GroupHCHWA_D	0.437603	4255	3
1.2934	0.765042	0.0105149	METTL21B	0.0673836	0	2501	GroupHCHWA_D	0.492254	2840	5
1.28355	0.764564	0.0306312	ZNF205-AS1	0.130467	0	3764	GroupHCHWA_D	0.542248	1219	7
2.58028	0.764231	0.00401582	WDR66	0.0385514	1	1667	GroupHCHWA_D	0.475669	4295	4
6.71409	0.764122	0.00762411	CACNA1G	0.0557131	0	2193	GroupHCHWA_D	0.603363	8267	8
4.68409	0.763999	0.092531	CD93	0.254757	0	5822	GroupHCHWA_D	0.509178	6701	6
5.4835	0.763946	0.000901844	FOXO4	0.0159938	1	904	GroupHCHWA_D	0.560335	3348	7
8.87053	0.763694	0.00269125	MTSS1L	0.0308622	1	1397	GroupHCHWA_D	0.643761	4977	9
1.37816	0.76339	0.080742	TEX14	0.234971	0	5509	GroupHCHWA_D	0.472301	4946	4
2.81367	0.763364	0.0464139	ACKR1	0.168426	0	4418	GroupHCHWA_D	0.556109	2210	7
1.28321	0.763157	0.0630728	LOC100288123	0.202075	0	5004	GroupHCHWA_D	0.633687	1698	9
5.61928	0.7624	0.00593405	IFRD1	0.0482494	1	1971	GroupHCHWA_D	0.421218	4138	2
1.03999	0.762333	0.0726418	CHAC2	0.219901	0	5296	GroupHCHWA_D	0.371765	1275	1
0.657955	0.76224	0.148357	ANKDD1B	0.33613	0	7076	GroupHCHWA_D	0.463166	2552	4
3.97494	0.761826	0.0442761	LOC285074	0.16343	0	4343	GroupHCHWA_D	0.530214	2201	6
1.85549	0.761259	0.0109867	C3orf35	0.0692641	0	2543	GroupHCHWA_D	0.43318	2821	3
4.1332	0.761233	0.00110356	BAZ1A	0.0178891	1	989	GroupHCHWA_D	0.410073	6016	2
1.49634	0.761201	0.0865681	TMEM233	0.244428	0	5678	GroupHCHWA_D	0.513668	1573	6
7.4432	0.760898	0.00032102	MCF2L2	0.00867604	1	593	GroupHCHWA_D	0.495512	5013	5
1.60984	0.76062	0.121606	KCNN4	0.299781	0	6503	GroupHCHWA_D	0.612946	2240	8
2.58215	0.760414	0.00801165	TNFSF12	0.0572128	0	2245	GroupHCHWA_D	0.609846	1625	8
2.72434	0.760353	0.05238	DNASE1L2	0.180399	0	4655	GroupHCHWA_D	0.660633	1326	9
4.1305	0.760152	0.0677945	TM4SF1	0.211212	0	5145	GroupHCHWA_D	0.424009	1691	3
1.88094	0.759979	0.0282378	GOLGA6L9	0.124166	0	3646	GroupHCHWA_D	0.410053	8972	2
4.6824	0.759723	0.0023573	C11orf84	0.0287447	1	1313	GroupHCHWA_D	0.642296	2038	9
2.91675	0.759652	0.0814924	SCN5A	0.236209	0	5531	GroupHCHWA_D	0.569268	8597	7
4.38721	0.759112	0.0031517	NEB	0.0334783	1	1509	GroupHCHWA_D	0.453567	26307	4
0.656959	0.758297	0.116582	LOC645752	0.292557	0	6388	GroupHCHWA_D	0.502406	3117	5
2.82933	0.758063	0.00436605	ZSCAN22	0.0405099	1	1726	GroupHCHWA_D	0.532845	4643	6
1.63945	0.757723	0.0396567	TNFRSF10A	0.153384	0	4145	GroupHCHWA_D	0.540571	1750	7
6.2315	0.756914	0.000628587	RSRC2	0.0128213	1	786	GroupHCHWA_D	0.407423	2452	2
7.43951	0.75666	0.000102351	ENAH	0.00432952	1	379	GroupHCHWA_D	0.407379	13172	2
1.20602	0.756523	0.0139481	LOC101928885	0.0800253	0	2794	GroupHCHWA_D	0.441286	2427	3
2.28871	0.756376	0.0466099	PNPLA5	0.16887	0	4425	GroupHCHWA_D	0.614173	2540	8
5.83974	0.7556	0.000340241	SBK1	0.00891298	1	612	GroupHCHWA_D	0.645032	4992	9
5.92601	0.755464	0.00261666	KDM7A	0.0304837	1	1375	GroupHCHWA_D	0.382109	9178	1
1.98306	0.754834	0.105603	NPR1	0.276396	0	6125	GroupHCHWA_D	0.60908	4185	8
5.41349	0.754816	0.00413361	CNTFR	0.0392131	1	1690	GroupHCHWA_D	0.627191	2111	9
6.91569	0.75472	0.000151354	FLCN	0.00543807	1	446	GroupHCHWA_D	0.559477	4052	7
3.87109	0.754603	5.74376e-05	ABHD17C	0.00316079	1	291	GroupHCHWA_D	0.497881	2360	5
8.05667	0.754534	0.00656562	FTL	0.0510971	0	2060	GroupHCHWA_D	0.560276	871	7
6.45416	0.754463	0.0057878	KCNC3	0.0476636	1	1946	GroupHCHWA_D	0.637436	6272	9
5.74281	0.754075	0.0157681	JDP2	0.0868334	0	2909	GroupHCHWA_D	0.5489	4274	7
3.37169	0.753699	0.0120886	GPR83	0.0735499	0	2635	GroupHCHWA_D	0.488557	4282	5
5.63147	0.75317	0.0226475	P2RX7	0.107581	0	3375	GroupHCHWA_D	0.506273	4065	5
3.10902	0.752859	0.0173012	SDF2L1	0.0917977	0	3021	GroupHCHWA_D	0.656751	874	9
5.92328	0.752716	0.00957492	MAF	0.063695	0	2410	GroupHCHWA_D	0.460308	6878	4
2.93249	0.752395	0.0017123	RIN3	0.0234429	1	1171	GroupHCHWA_D	0.63556	3847	9
5.9116	0.751244	0.000968871	DNMT3A	0.0166794	1	931	GroupHCHWA_D	0.551024	5664	7
3.56008	0.750783	0.000927454	ZNF354B	0.016268	1	914	GroupHCHWA_D	0.413746	2197	2
4.80527	0.750697	0.197647	ADCYAP1	0.400845	0	7905	GroupHCHWA_D	0.438259	3377	3
4.98038	0.750544	0.000113203	SETD1A	0.00457967	1	394	GroupHCHWA_D	0.623663	6449	9
2.48427	0.750438	0.08641	GPR6	0.24411	0	5675	GroupHCHWA_D	0.598049	1948	8
4.30012	0.749947	0.00209736	HMG20B	0.026943	1	1248	GroupHCHWA_D	0.636364	1584	9
2.85054	0.749674	0.102174	MSR1	0.271335	0	6037	GroupHCHWA_D	0.368852	5490	1
5.13382	0.749423	0.00906849	CCDC57	0.061596	0	2359	GroupHCHWA_D	0.598265	2997	8
1.71707	0.749209	0.0761817	PLK1	0.226843	0	5384	GroupHCHWA_D	0.572968	2227	7
3.13077	0.749206	0.0329866	CCDC159	0.136548	0	3872	GroupHCHWA_D	0.57667	1063	8
5.79057	0.74909	0.000360321	CELF3	0.00911222	1	633	GroupHCHWA_D	0.54235	5856	7
5.98401	0.749082	1.70493e-05	TOP1	0.00156759	1	173	GroupHCHWA_D	0.421377	3733	2
2.46001	0.748613	0.0243698	SIX5	0.112853	0	3462	GroupHCHWA_D	0.680276	3331	9
0.77675	0.747427	0.0552222	EHMT1-IT1	0.186423	0	4749	GroupHCHWA_D	0.525414	1751	6
2.92182	0.747114	0.025983	APOL1	0.11757	0	3542	GroupHCHWA_D	0.51538	3056	6
5.72992	0.746674	0.0209041	ELK1	0.102519	0	3269	GroupHCHWA_D	0.575737	2918	7
0.588922	0.746599	0.168746	ADORA2A	0.364109	0	7430	GroupHCHWA_D	0.609195	2958	8
3.58502	0.746472	0.0317004	HCN4	0.133637	0	3803	GroupHCHWA_D	0.617875	7228	9
5.10099	0.746204	0.000760356	DHX34	0.014392	1	847	GroupHCHWA_D	0.61505	4372	8
6.02217	0.745803	0.000963483	ARL5A	0.0166571	1	927	GroupHCHWA_D	0.357842	3169	1
1.99651	0.745784	0.0650655	MRGPRF	0.205786	0	5069	GroupHCHWA_D	0.630749	2283	9
6.82035	0.745398	0.00241336	HSPA4L	0.0290473	1	1332	GroupHCHWA_D	0.405199	3270	2
2.38934	0.745293	0.0637457	FHL5	0.20357	0	5020	GroupHCHWA_D	0.401405	2135	2
6.862	0.745041	0.00256865	PLEKHO1	0.0301911	1	1364	GroupHCHWA_D	0.625223	2807	9
3.18588	0.743869	0.0123702	PI4K2B	0.0745938	0	2658	GroupHCHWA_D	0.378228	3601	1
2.34874	0.742912	0.119223	MYLK3	0.296543	0	6444	GroupHCHWA_D	0.463376	8205	4
2.11218	0.742907	0.0429617	TLCD2	0.160785	0	4283	GroupHCHWA_D	0.497882	11802	5
4.45377	0.742761	0.0115494	IL34	0.0716283	0	2585	GroupHCHWA_D	0.623891	1917	9
5.36736	0.74256	0.0259883	COL6A2	0.11757	0	3543	GroupHCHWA_D	0.659834	4342	9
9.52838	0.742553	0.0047611	AKAP12	0.0425608	1	1792	GroupHCHWA_D	0.470367	8791	4
3.82844	0.742542	0.000524121	BCORL1	0.0114948	1	731	GroupHCHWA_D	0.564975	7349	7
1.51023	0.742275	0.0227782	CRACR2B	0.107997	0	3381	GroupHCHWA_D	0.663388	1830	9
3.14283	0.74205	0.0014008	THAP1	0.0206033	1	1090	GroupHCHWA_D	0.366405	2167	1
3.81689	0.741524	0.063892	CAPS	0.203885	0	5024	GroupHCHWA_D	0.622729	2147	9
3.72348	0.74125	0.000543202	CCDC86	0.011731	1	742	GroupHCHWA_D	0.604963	2015	8
3.49903	0.741201	0.00971622	ZNF814	0.0641636	0	2426	GroupHCHWA_D	0.44135	6283	3
4.11403	0.740019	0.0428309	PLSCR1	0.160525	0	4277	GroupHCHWA_D	0.395023	2210	2
5.86377	0.739318	0.00582313	TPP1	0.047781	1	1952	GroupHCHWA_D	0.504953	3533	5
5.65339	0.739107	0.00583172	CDC37L1	0.0477987	1	1956	GroupHCHWA_D	0.372973	3515	1
3.03865	0.738598	0.0263355	CDKN2C	0.118732	0	3556	GroupHCHWA_D	0.543584	2478	7
4.0849	0.738579	0.00193773	LOC100130705	0.0255475	1	1216	GroupHCHWA_D	0.594531	3803	8
4.03499	0.738252	0.00372807	HTATIP2	0.0369279	1	1618	GroupHCHWA_D	0.489476	2233	5
4.22504	0.737698	0.00340984	DCUN1D3	0.0350324	1	1558	GroupHCHWA_D	0.448047	2868	3
4.33573	0.737046	0.00227183	SOHLH1	0.0282451	1	1289	GroupHCHWA_D	0.639798	1985	9
0.89217	0.736795	0.107695	LCN10	0.27965	0	6174	GroupHCHWA_D	0.575607	2017	7
4.517	0.736688	0.0273917	LRRC32	0.121815	0	3605	GroupHCHWA_D	0.588169	4446	8
2.45665	0.736664	0.0142896	ZNF774	0.0810079	0	2828	GroupHCHWA_D	0.508705	1838	6
2.33192	0.736218	0.0299084	AGAP4	0.128378	0	3735	GroupHCHWA_D	0.508972	2898	6
1.57644	0.735992	0.142589	ST3GAL5-AS1	0.328541	0	6958	GroupHCHWA_D	0.430108	1116	3
1.59816	0.735743	0.018628	MEX3A	0.0959346	0	3113	GroupHCHWA_D	0.538863	6124	6
3.4996	0.735268	0.000829574	ZNF580	0.015011	1	886	GroupHCHWA_D	0.644895	1577	9
3.71813	0.735124	0.00727556	BLOC1S3	0.0542268	0	2151	GroupHCHWA_D	0.594615	2600	8
2.91008	0.7344	0.105268	KIAA0040	0.275807	0	6119	GroupHCHWA_D	0.480905	4818	5
0.788908	0.734238	0.0512117	PP14571	0.178019	0	4612	GroupHCHWA_D	0.56123	2017	7
1.33529	0.733906	0.05838	ANKRD20A4	0.19282	0	4854	GroupHCHWA_D	0.377595	3517	1
4.43493	0.733857	0.120734	MT1X	0.298752	0	6479	GroupHCHWA_D	0.492574	404	5
2.39734	0.733765	0.0371582	C4orf32	0.147342	0	4043	GroupHCHWA_D	0.361702	2726	1
1.37535	0.733575	0.0492987	TCF7	0.174453	0	4530	GroupHCHWA_D	0.568529	4188	7
8.00518	0.73348	0.0657332	SOGA3	0.207325	0	5083	GroupHCHWA_D	0.439245	11818	3
0.51548	0.733032	0.127535	ZNF750	0.308268	0	6632	GroupHCHWA_D	0.528988	3191	6
3.58696	0.732425	0.000995105	SNTB1	0.0169538	1	941	GroupHCHWA_D	0.434171	4975	3
3.75033	0.732252	0.00235038	C9orf40	0.0287424	1	1311	GroupHCHWA_D	0.467097	2325	4
3.07313	0.732098	0.0172563	INHBB	0.0916982	0	3017	GroupHCHWA_D	0.566656	3203	7
3.92965	0.732015	0.0130341	SH3D21	0.0770225	0	2713	GroupHCHWA_D	0.608763	2579	8
4.62329	0.731842	0.00189209	UBALD2	0.0251526	1	1206	GroupHCHWA_D	0.63562	1589	9
2.2623	0.731721	0.03301	HELLS	0.136572	0	3875	GroupHCHWA_D	0.384937	3346	1
6.30336	0.731544	0.0001036	RPLP1	0.00435938	1	381	GroupHCHWA_D	0.558594	512	7
5.74778	0.731446	0.0133669	CA2	0.0783433	0	2735	GroupHCHWA_D	0.439376	1666	3
6.30044	0.731332	0.00172282	SRSF4	0.0235065	1	1175	GroupHCHWA_D	0.533202	2530	6
2.33255	0.731021	0.0384901	ZNF345	0.150506	0	4100	GroupHCHWA_D	0.40478	3933	2
5.53992	0.731019	0.000284938	ATP1B3	0.0082013	1	557	GroupHCHWA_D	0.421479	1853	2
4.11677	0.730385	0.0467026	N4BP2L2-IT2	0.169069	0	4427	GroupHCHWA_D	0.380982	4890	1
5.62695	0.730275	0.015978	HECTD2	0.0876956	0	2921	GroupHCHWA_D	0.355521	6430	1
4.59095	0.730259	0.0291115	WIF1	0.12631	0	3695	GroupHCHWA_D	0.471875	2240	4
3.89817	0.729904	0.0128194	RHBDF2	0.0760845	0	2701	GroupHCHWA_D	0.620804	3605	9
6.30392	0.729428	0.00694272	GOLPH3	0.0527515	0	2110	GroupHCHWA_D	0.445815	2676	3
7.30143	0.729341	0.00440991	MCL1	0.0406554	1	1739	GroupHCHWA_D	0.45459	4085	4
5.90926	0.728995	0.00556292	HNRNPAB	0.0466587	1	1911	GroupHCHWA_D	0.542952	1816	7
4.28359	0.728732	0.0060934	MFSD2A	0.0489834	1	1992	GroupHCHWA_D	0.556258	2213	7
5.41802	0.728262	0.0195268	ITPKC	0.0986529	0	3172	GroupHCHWA_D	0.608978	3386	8
7.50099	0.728246	0.0185641	MYO10	0.0957734	0	3106	GroupHCHWA_D	0.492738	11430	5
3.08969	0.728185	0.0232119	CDC14A	0.10925	0	3406	GroupHCHWA_D	0.400593	5392	2
1.42581	0.728163	0.0305696	LAT	0.130267	0	3762	GroupHCHWA_D	0.621138	1845	9
4.83564	0.728142	0.0118985	UPF3A	0.0728307	0	2619	GroupHCHWA_D	0.484074	2386	5
4.49667	0.728057	8.73675e-05	FAM43A	0.00396841	1	352	GroupHCHWA_D	0.62035	3145	9
4.87228	0.728043	0.102536	CCDC144B	0.271712	0	6050	GroupHCHWA_D	0.381785	8696	1
1.97686	0.727706	0.146703	MSC	0.333767	0	7046	GroupHCHWA_D	0.627308	2058	9
0.578487	0.727559	0.120821	TSSK4	0.298783	0	6483	GroupHCHWA_D	0.505747	1392	5
1.22149	0.727378	0.0804064	PROSER2	0.234377	0	5500	GroupHCHWA_D	0.539154	3333	6
0.750537	0.727363	0.0522088	LINC01176	0.180041	0	4649	GroupHCHWA_D	0.478322	715	5
6.55016	0.727142	0.00433343	SREK1	0.0403447	1	1722	GroupHCHWA_D	0.36554	8932	1
4.54609	0.726978	0.00472562	PTCHD2	0.0423957	1	1787	GroupHCHWA_D	0.627158	5214	9
1.36857	0.726713	0.126371	CHMP3	0.306415	0	6611	GroupHCHWA_D	0.441416	3192	3
5.0172	0.726605	0.00113679	RCN1	0.0182433	1	999	GroupHCHWA_D	0.465421	2516	4
4.51142	0.726369	3.65804e-05	PXN	0.00246662	1	236	GroupHCHWA_D	0.587287	4216	8
2.40591	0.726292	0.0299994	A4GALT	0.128596	0	3740	GroupHCHWA_D	0.641969	2092	9
0.960495	0.726249	0.208163	CLEC5A	0.412243	0	8095	GroupHCHWA_D	0.419802	3535	2
1.11473	0.725975	0.034974	SLFN12	0.141306	0	3968	GroupHCHWA_D	0.400785	2802	2
4.90338	0.725907	0.009725	TGFB3	0.0641674	0	2429	GroupHCHWA_D	0.516773	3458	6
3.48683	0.72586	0.00097843	NUTM2B-AS1	0.0167767	1	935	GroupHCHWA_D	0.40972	5206	2
6.48699	0.725447	0.00561914	ORAI2	0.0468954	1	1921	GroupHCHWA_D	0.572657	10811	7
1.19114	0.724569	0.0698635	LOC101929516	0.21494	0	5211	GroupHCHWA_D	0.439938	641	3
5.67675	0.723865	8.44656e-05	ZCCHC2	0.00395951	1	342	GroupHCHWA_D	0.481826	7841	5
4.36295	0.723788	0.000518193	STK17B	0.0114116	1	728	GroupHCHWA_D	0.368947	5307	1
3.63703	0.723289	0.098398	OXTR	0.265441	0	5943	GroupHCHWA_D	0.500459	4360	5
4.47196	0.72299	0.000321545	GPR137B	0.00867604	1	594	GroupHCHWA_D	0.462782	2042	4
8.55936	0.722721	0.0053167	HSP90B1	0.0453149	1	1881	GroupHCHWA_D	0.424179	2862	3
3.88632	0.722409	0.153572	TRIM58	0.343504	0	7166	GroupHCHWA_D	0.479829	5156	5
8.58478	0.721893	0.000321996	KIF5B	0.00867604	1	595	GroupHCHWA_D	0.391747	5889	1
2.28898	0.721631	0.0247341	SAMD15	0.113915	0	3481	GroupHCHWA_D	0.449877	2025	4
2.8386	0.721372	0.00570312	ZNF781	0.0472275	1	1936	GroupHCHWA_D	0.360917	3142	1
5.95229	0.72098	0.0707461	CACNA1H	0.216616	0	5236	GroupHCHWA_D	0.658259	8088	9
6.13227	0.720867	0.000295494	FBRSL1	0.00832295	1	568	GroupHCHWA_D	0.661975	4547	9
4.59611	0.720199	0.0038454	CREM	0.0377283	1	1633	GroupHCHWA_D	0.409122	5876	2
4.05567	0.720196	0.00566181	SNAP23	0.047062	1	1926	GroupHCHWA_D	0.414237	2641	2
6.72367	0.720137	0.00208953	EIF1	0.026864	1	1247	GroupHCHWA_D	0.47813	1326	5
4.12903	0.720004	0.0109569	CCDC61	0.0691851	0	2539	GroupHCHWA_D	0.663193	1823	9
3.14719	0.719863	0.178319	RDH14	0.375426	0	7613	GroupHCHWA_D	0.5025	1600	5
0.588346	0.719081	0.122499	LOC101928909	0.300843	0	6528	GroupHCHWA_D	0.441224	1242	3
7.12185	0.718981	0.0173978	STIP1	0.0921142	0	3028	GroupHCHWA_D	0.557507	2904	7
3.49285	0.718736	0.0772824	ANXA2	0.228765	0	5416	GroupHCHWA_D	0.477373	1812	5
3.75404	0.717976	0.0469166	IFITM1	0.169483	0	4437	GroupHCHWA_D	0.538354	717	6
5.36428	0.717482	0.000477526	HERPUD1	0.0109621	1	697	GroupHCHWA_D	0.494277	1922	5
4.01534	0.717265	0.0136394	MLF1	0.0791928	0	2761	GroupHCHWA_D	0.358226	2638	1
2.83255	0.717211	0.104754	PCDHA13	0.274928	0	6108	GroupHCHWA_D	0.482713	5293	5
6.34622	0.716196	0.0014001	CFLAR	0.0206033	1	1089	GroupHCHWA_D	0.463539	15921	4
6.93308	0.715934	0.0134968	CNN3	0.0787126	0	2749	GroupHCHWA_D	0.459353	2288	4
1.46401	0.715469	0.0331289	MKLN1-AS	0.136731	0	3883	GroupHCHWA_D	0.440371	2046	3
6.17824	0.715356	0.00587106	ACBD3	0.0479739	1	1962	GroupHCHWA_D	0.417391	3565	2
4.33913	0.714796	0.000438809	ZNF808	0.0103771	1	677	GroupHCHWA_D	0.409846	3311	2
5.76295	0.714538	0.00323657	RYBP	0.0340024	1	1525	GroupHCHWA_D	0.374241	4449	1
2.83221	0.714532	0.0148211	ADGRL4	0.0832264	0	2855	GroupHCHWA_D	0.353965	3619	1
2.13501	0.713683	0.0556255	TTC25	0.187141	0	4765	GroupHCHWA_D	0.499781	2287	5
2.37481	0.713525	0.173011	CXCR4	0.369556	0	7503	GroupHCHWA_D	0.446384	2005	3
3.19209	0.713308	0.0826722	DCLK3	0.237874	0	5570	GroupHCHWA_D	0.473054	5344	4
1.03841	0.713274	0.0692338	LINC00877	0.214001	0	5186	GroupHCHWA_D	0.471706	2315	4
3.90417	0.713081	0.00860534	C1QL2	0.059801	0	2307	GroupHCHWA_D	0.684236	2049	9
4.67178	0.712761	0.0135051	RNPC3	0.0787325	0	2750	GroupHCHWA_D	0.4	1885	2
2.3418	0.712712	0.042894	EIF5AL1	0.160672	0	4280	GroupHCHWA_D	0.456465	3836	4
3.92303	0.712543	0.00298088	ZNF703	0.0326654	1	1463	GroupHCHWA_D	0.651538	3349	9
8.07837	0.711813	0.00019131	DTNA	0.00640309	1	479	GroupHCHWA_D	0.418384	10727	2
6.40837	0.711704	9.10474e-06	PCNP	0.00105015	1	138	GroupHCHWA_D	0.346137	2239	1
3.28765	0.711543	0.012309	CETN3	0.0743269	0	2655	GroupHCHWA_D	0.329371	1430	1
4.27333	0.711386	0.00986639	PXDC1	0.064721	0	2444	GroupHCHWA_D	0.601641	2194	8
4.02358	0.71125	0.0053337	VAV3	0.0454119	1	1882	GroupHCHWA_D	0.416067	4867	2
4.04173	0.71123	0.00132067	LIMD1	0.0198695	1	1065	GroupHCHWA_D	0.50557	6284	5
6.18456	0.711041	0.00578913	SOX2	0.0476636	1	1947	GroupHCHWA_D	0.507166	2512	6
1.40494	0.71076	0.0936077	PILRA	0.256841	0	5843	GroupHCHWA_D	0.559271	1316	7
4.29952	0.710234	0.000307464	CDK2AP2	0.00844051	1	584	GroupHCHWA_D	0.645287	1793	9
1.86759	0.710012	0.0601521	ZNF563	0.196008	0	4920	GroupHCHWA_D	0.438514	2773	3
4.22231	0.709923	0.00324527	EFNB1	0.0340024	1	1528	GroupHCHWA_D	0.604204	3330	8
3.05649	0.709789	0.0027763	KPTN	0.031256	1	1424	GroupHCHWA_D	0.607524	1781	8
3.23579	0.70881	0.0018482	PRAF2	0.024816	1	1194	GroupHCHWA_D	0.599388	1308	8
5.66226	0.708338	0.0127243	ZCCHC3	0.0757177	0	2694	GroupHCHWA_D	0.556039	2757	7
5.38395	0.708258	0.0184213	C19orf26	0.0952677	0	3100	GroupHCHWA_D	0.696568	2564	9
4.54695	0.708172	0.00292697	TOB1	0.0323622	1	1450	GroupHCHWA_D	0.44162	2518	3
1.06035	0.708091	0.083816	MIR210HG	0.240141	0	5595	GroupHCHWA_D	0.590751	4606	8
4.27454	0.708052	0.00709443	SVIL	0.0533126	0	2133	GroupHCHWA_D	0.497952	8547	5
4.14723	0.707798	0.0126401	RAD52	0.0755898	0	2679	GroupHCHWA_D	0.496539	3756	5
6.77334	0.707376	0.00465181	C16orf72	0.041992	1	1776	GroupHCHWA_D	0.439809	3979	3
3.22707	0.70703	0.0943106	PCDHA5	0.258062	0	5859	GroupHCHWA_D	0.473011	5317	4
3.68621	0.706881	0.0342384	ANKRD23	0.139601	0	3932	GroupHCHWA_D	0.601859	2582	8
2.91	0.706808	0.0401726	LRP2BP	0.154707	0	4163	GroupHCHWA_D	0.3829	5158	1
3.77197	0.706751	0.00114537	KCTD6	0.0183442	1	1001	GroupHCHWA_D	0.410068	1907	2
6.03823	0.706364	0.00437409	CEBPB	0.0405349	1	1730	GroupHCHWA_D	0.673305	2109	9
4.19077	0.706288	0.0101146	PIM1	0.0656773	0	2469	GroupHCHWA_D	0.564415	2709	7
1.72557	0.706153	0.0634924	PABPC1L2B	0.202892	0	5017	GroupHCHWA_D	0.497727	2200	5
4.87113	0.706108	0.0136276	TPD52L1	0.0791928	0	2758	GroupHCHWA_D	0.517453	1633	6
2.06906	0.705064	0.028979	FBXW4P1	0.125974	0	3688	GroupHCHWA_D	0.588446	2233	8
8.01729	0.705012	0.000474693	RPL3	0.01095	1	695	GroupHCHWA_D	0.544096	1338	7
2.83946	0.704861	0.00592937	C15orf39	0.0482494	1	1970	GroupHCHWA_D	0.625706	4427	9
5.71115	0.704792	0.000196091	AUTS2	0.00650876	1	483	GroupHCHWA_D	0.538253	7006	6
3.13382	0.704762	0.013459	BRCAT54	0.0785858	0	2745	GroupHCHWA_D	0.355556	1395	1
6.18471	0.704489	0.00782696	TMEM165	0.0566303	0	2215	GroupHCHWA_D	0.454283	2078	4
3.50139	0.704312	0.0445427	CCDC34	0.163937	0	4355	GroupHCHWA_D	0.373428	2943	1
0.909966	0.703693	0.109303	GNRH1	0.281999	0	6214	GroupHCHWA_D	0.394419	2150	1
3.69771	0.702802	0.0015032	LDLRAD3	0.0214597	1	1123	GroupHCHWA_D	0.484916	4011	5
6.2709	0.702265	0.00187132	PRDM8	0.0249592	1	1202	GroupHCHWA_D	0.560559	4219	7
5.1125	0.702151	0.0175027	TCHP	0.0924103	0	3036	GroupHCHWA_D	0.518429	3310	6
4.65228	0.701849	0.00146106	SNHG6	0.0210835	1	1111	GroupHCHWA_D	0.42161	472	2
2.18115	0.701751	0.0746458	MYD88	0.224021	0	5342	GroupHCHWA_D	0.539506	2873	6
5.75248	0.701682	0.0599303	EID2	0.195563	0	4913	GroupHCHWA_D	0.526202	1393	6
1.13242	0.70138	0.205541	KISS1R	0.409347	0	8050	GroupHCHWA_D	0.682462	1625	9
1.1975	0.70115	0.0478701	LOC101929767	0.171382	0	4477	GroupHCHWA_D	0.484195	696	5
3.73767	0.700805	0.00827053	PSPH	0.0584069	0	2270	GroupHCHWA_D	0.495751	2118	5
5.04957	0.69939	0.00077394	EPS15L1	0.0145763	1	851	GroupHCHWA_D	0.538626	5152	6
7.00609	0.699308	6.03842e-06	RAI1	0.00075045	1	129	GroupHCHWA_D	0.640731	7660	9
5.49544	0.699291	0.000636085	SEPN1	0.0129085	1	790	GroupHCHWA_D	0.598107	4332	8
4.51984	0.699145	0.00439331	GRK5	0.0405957	1	1735	GroupHCHWA_D	0.536747	2558	6
2.13408	0.699023	0.0285106	FAM229A	0.124749	0	3664	GroupHCHWA_D	0.692418	699	9
4.66504	0.698743	0.000201312	SCAF4	0.00662716	1	487	GroupHCHWA_D	0.510424	4269	6
3.90262	0.698438	0.00921205	RHOF	0.0622629	0	2372	GroupHCHWA_D	0.590965	2435	8
1.73748	0.698243	0.112009	SYNE1-AS1	0.286414	0	6269	GroupHCHWA_D	0.488145	717	5
3.3863	0.697989	0.0314596	DDX11	0.132866	0	3796	GroupHCHWA_D	0.578559	3927	8
6.79707	0.697951	0.00457208	INPP5A	0.0415517	1	1764	GroupHCHWA_D	0.528931	2938	6
3.72781	0.697812	0.00162276	PDRG1	0.0227413	1	1144	GroupHCHWA_D	0.546977	1373	7
4.279	0.697766	0.00376723	SRGAP1	0.0371669	1	1625	GroupHCHWA_D	0.455339	8475	4
3.56849	0.69759	0.0166375	KIAA1407	0.0899041	0	2966	GroupHCHWA_D	0.444165	3976	3
5.34402	0.697508	0.123916	RANBP3L	0.303201	0	6552	GroupHCHWA_D	0.357525	2618	1
6.09891	0.697432	0.000593959	ATXN2L	0.0123828	1	769	GroupHCHWA_D	0.604515	4430	8
3.66299	0.697419	0.00493503	LATS2	0.0433288	1	1826	GroupHCHWA_D	0.51759	5543	6
5.29729	0.696793	0.00516495	ERRFI1	0.0446145	1	1856	GroupHCHWA_D	0.43752	3129	3
5.77937	0.696787	5.60897e-05	AEBP2	0.00314416	1	286	GroupHCHWA_D	0.381092	5807	1
2.44109	0.69643	0.0429922	AGPAT4-IT1	0.160785	0	4285	GroupHCHWA_D	0.5208	1851	6
0.279286	0.696065	0.16324	MMP9	0.356598	0	7339	GroupHCHWA_D	0.623716	2336	9
5.80345	0.695821	0.00673482	KAT2A	0.0516863	0	2089	GroupHCHWA_D	0.599293	3112	8
5.77403	0.695248	0.0351477	LTBP4	0.141829	0	3973	GroupHCHWA_D	0.674683	5447	9
3.82922	0.695164	0.176691	MT1M	0.373709	0	7580	GroupHCHWA_D	0.527273	440	6
2.40963	0.69502	0.0873688	ZNF486	0.245866	0	5697	GroupHCHWA_D	0.397485	3897	2
3.31701	0.695001	0.0465884	ZNF235	0.168861	0	4423	GroupHCHWA_D	0.421317	3190	2
2.39175	0.694908	0.0476019	LOC441455	0.170874	0	4466	GroupHCHWA_D	0.478446	1647	5
6.39423	0.694704	0.0349115	JAKMIP3	0.14116	0	3965	GroupHCHWA_D	0.534834	6488	6
5.85415	0.694497	6.16856e-05	ELAVL1	0.0033075	1	299	GroupHCHWA_D	0.463354	6058	4
3.99441	0.694465	0.0387297	COA6	0.151037	0	4111	GroupHCHWA_D	0.472571	1276	4
7.43095	0.694368	0.000346446	RBM39	0.0089387	1	621	GroupHCHWA_D	0.425969	3019	3
7.39877	0.694365	0.000272864	IRF2BP2	0.00799735	1	547	GroupHCHWA_D	0.480377	4663	5
0.721522	0.693912	0.159746	HAS2	0.352035	0	7275	GroupHCHWA_D	0.381069	3275	1
3.38449	0.693279	0.00574914	ZFP69B	0.0474859	1	1941	GroupHCHWA_D	0.437223	2031	3
6.41724	0.692953	0.00459762	HSPB8	0.0416867	1	1768	GroupHCHWA_D	0.525974	2002	6
6.68466	0.692798	0.00385354	RIMBP2	0.0377283	1	1637	GroupHCHWA_D	0.498576	6322	5
4.30397	0.692518	0.0881528	GREM2	0.247343	0	5713	GroupHCHWA_D	0.477169	4183	5
2.05593	0.692471	0.041698	FANK1	0.158136	0	4227	GroupHCHWA_D	0.493056	1296	5
6.6984	0.692396	0.000408097	BHLHE40	0.00997453	1	655	GroupHCHWA_D	0.50857	3034	6
3.54327	0.692321	0.00225807	NATD1	0.0281246	1	1287	GroupHCHWA_D	0.593606	4786	8
6.26407	0.691903	0.000582576	AHDC1	0.012241	1	763	GroupHCHWA_D	0.636993	6358	9
3.48884	0.69141	0.197499	CSNK1E	0.400645	0	7903	GroupHCHWA_D	0.578347	2891	8
2.85178	0.691124	0.0126637	CCDC120	0.0756141	0	2685	GroupHCHWA_D	0.625679	4416	9
4.99541	0.690875	0.00117097	CBFB	0.0184956	1	1015	GroupHCHWA_D	0.40632	3133	2
3.61502	0.690586	0.00858181	FHOD1	0.0597142	0	2304	GroupHCHWA_D	0.608718	3854	8
7.38061	0.690493	4.9979e-05	CREBBP	0.00291854	1	273	GroupHCHWA_D	0.542271	10196	7
0.840554	0.689883	0.056936	ITPKB-IT1	0.189972	0	4804	GroupHCHWA_D	0.518189	1347	6
4.62252	0.68924	0.012497	ZHX2	0.07501	0	2671	GroupHCHWA_D	0.516862	4359	6
6.60013	0.689042	0.000379721	DLGAP4	0.00943826	1	645	GroupHCHWA_D	0.616867	6071	9
6.96531	0.688914	0.00124453	FXR1	0.01931	1	1033	GroupHCHWA_D	0.371422	8909	1
4.00586	0.688866	0.00686971	MTRF1L	0.0523705	0	2103	GroupHCHWA_D	0.411286	4058	2
4.17919	0.687994	0.410434	TTTY15	0.617389	0	10657	GroupHCHWA_D	0.396414	5242	2
5.50408	0.687915	0.00697772	STARD10	0.0528921	0	2115	GroupHCHWA_D	0.570423	1988	7
2.43281	0.687817	0.0840767	ZNF818P	0.240485	0	5605	GroupHCHWA_D	0.42599	3155	3
2.49355	0.687787	0.0243648	C1orf64	0.112853	0	3461	GroupHCHWA_D	0.573894	927	7
7.09035	0.687665	3.29815e-05	DUSP8	0.00233964	1	226	GroupHCHWA_D	0.646397	13419	9
5.87219	0.687607	0.00203743	DNAJB6	0.0264701	1	1234	GroupHCHWA_D	0.457367	3190	4
4.44648	0.686865	0.0282844	P3H3	0.124166	0	3652	GroupHCHWA_D	0.65232	2672	9
1.29861	0.686395	0.0919693	TAS1R3	0.253822	0	5809	GroupHCHWA_D	0.665494	2559	9
0.793996	0.68622	0.178073	EEF1DP3	0.375245	0	7608	GroupHCHWA_D	0.523478	575	6
1.46809	0.685852	0.062256	SIRT4	0.200464	0	4978	GroupHCHWA_D	0.514876	1210	6
4.76393	0.685844	0.00710069	NHSL1	0.0533126	0	2135	GroupHCHWA_D	0.503575	7832	5
5.21056	0.685626	0.00895811	RNF149	0.0612176	0	2346	GroupHCHWA_D	0.442385	2968	3
7.68921	0.685451	0.00109817	HSPA4	0.0178559	1	986	GroupHCHWA_D	0.440177	3385	3
6.42094	0.685434	0.00301966	RCC2	0.0327186	1	1478	GroupHCHWA_D	0.542157	4163	7
5.02859	0.685215	0.0546735	PDGFB	0.185643	0	4721	GroupHCHWA_D	0.606352	3432	8
1.84498	0.684684	0.0419165	PABPC1L	0.158679	0	4235	GroupHCHWA_D	0.588539	2129	8
5.27219	0.684051	0.000133052	VPS37A	0.00505472	1	422	GroupHCHWA_D	0.372083	4585	1
3.3931	0.683081	0.0500136	ECHDC2	0.175645	0	4565	GroupHCHWA_D	0.555346	1590	7
3.51008	0.682831	0.00585625	PSME2	0.0479017	1	1960	GroupHCHWA_D	0.51146	829	6
5.50592	0.682617	0.156963	ADAMTS9	0.348313	0	7224	GroupHCHWA_D	0.473468	7312	4
1.19337	0.682568	0.249392	SNORD116-12	0.458117	0	8726	GroupHCHWA_D	0.361702	94	1
4.30026	0.68236	0.000681565	EXOSC3	0.0135233	1	808	GroupHCHWA_D	0.424226	1841	3
4.94296	0.6817	0.0452132	SLCO4A1	0.16553	0	4379	GroupHCHWA_D	0.618156	2776	9
0.838908	0.681162	0.118975	CFP	0.296319	0	6437	GroupHCHWA_D	0.621972	1775	9
5.64641	0.680724	0.0278369	CXCL14	0.122996	0	3628	GroupHCHWA_D	0.513938	1973	6
3.846	0.680359	0.00734272	B4GALNT3	0.0545234	0	2158	GroupHCHWA_D	0.59395	3438	8
0.974981	0.680238	0.146415	SNORD97	0.333456	0	7038	GroupHCHWA_D	0.380282	142	1
0.734615	0.680033	0.0701976	PRR34	0.215533	0	5221	GroupHCHWA_D	0.600763	1836	8
5.44167	0.679818	0.000162457	FBRS	0.00578779	1	450	GroupHCHWA_D	0.657984	4108	9
4.07151	0.679767	0.00726096	LACTB	0.0541935	0	2148	GroupHCHWA_D	0.418488	3797	2
1.82146	0.67951	0.0868005	TUBA3FP	0.244825	0	5684	GroupHCHWA_D	0.567857	1960	7
1.66063	0.679492	0.0597267	SRGAP2D	0.195257	0	4904	GroupHCHWA_D	0.440906	3046	3
4.76707	0.679382	0.00267789	ZNF786	0.030771	1	1395	GroupHCHWA_D	0.561812	3268	7
6.58007	0.679319	0.000265178	GRIK5	0.00783294	1	542	GroupHCHWA_D	0.619623	4301	9
2.96257	0.678574	0.102954	ZNF876P	0.272415	0	6059	GroupHCHWA_D	0.372842	2607	1
3.50062	0.678318	0.023288	ZFAND4	0.109488	0	3410	GroupHCHWA_D	0.42881	4193	3
5.42545	0.677651	1.0875e-05	RBM12B	0.00117803	1	148	GroupHCHWA_D	0.407407	5103	2
3.03097	0.677638	0.0812472	LINC01094	0.235757	0	5525	GroupHCHWA_D	0.39314	4286	1
3.57977	0.677513	0.07863	HES1	0.23118	0	5452	GroupHCHWA_D	0.517454	1461	6
3.57705	0.677372	0.0356121	NCAM1-AS1	0.143306	0	3984	GroupHCHWA_D	0.58906	713	8
4.39086	0.676868	0.00828469	RARA	0.0584338	0	2273	GroupHCHWA_D	0.64022	4361	9
6.27157	0.676624	0.0236938	FKBP5	0.110714	0	3430	GroupHCHWA_D	0.423974	10628	3
6.86254	0.676418	0.017205	CREBZF	0.0914932	0	3014	GroupHCHWA_D	0.385875	7575	1
3.89863	0.676129	0.00058743	SNX33	0.012304	1	765	GroupHCHWA_D	0.579647	3233	8
5.63215	0.676085	0.00673089	SDC2	0.0516863	0	2087	GroupHCHWA_D	0.429268	3485	3
7.46983	0.676054	0.00100175	NIN	0.0170006	1	944	GroupHCHWA_D	0.41688	10936	2
6.99708	0.675443	0.000539772	HNRNPM	0.0116941	1	740	GroupHCHWA_D	0.545903	2636	7
6.3491	0.675336	0.0115106	BHLHE41	0.071499	0	2580	GroupHCHWA_D	0.492328	3780	5
5.80233	0.675268	0.0116554	PDIA4	0.0720423	0	2593	GroupHCHWA_D	0.53252	2952	6
6.29445	0.675063	0.00164567	CHMP4B	0.0228577	1	1154	GroupHCHWA_D	0.534305	1647	6
2.09612	0.674497	0.0520008	POLG2	0.179675	0	4639	GroupHCHWA_D	0.468005	1594	4
2.96479	0.67447	0.0611993	CASC2	0.198155	0	4951	GroupHCHWA_D	0.389912	5214	1
9.85581	0.674308	0.0524978	AHNAK	0.180681	0	4658	GroupHCHWA_D	0.493693	19265	5
3.70123	0.673739	0.00186754	SGPP2	0.0249348	1	1200	GroupHCHWA_D	0.544167	1200	7
3.51459	0.673233	0.141394	RGS16	0.326586	0	6941	GroupHCHWA_D	0.533306	2432	6
2.54511	0.672886	0.0340992	PLEKHG2	0.139388	0	3922	GroupHCHWA_D	0.560799	7607	7
3.50744	0.672462	0.00149727	ZNF141	0.0214152	1	1120	GroupHCHWA_D	0.402558	1642	2
4.66393	0.67229	0.00514836	EMILIN1	0.0445103	1	1852	GroupHCHWA_D	0.677772	3932	9
2.56951	0.672134	0.0858905	C2CD4D	0.243415	0	5657	GroupHCHWA_D	0.69352	1713	9
7.73707	0.671993	0.00670776	CCSAP	0.0516745	0	2081	GroupHCHWA_D	0.393478	5121	1
5.56442	0.671943	0.00322312	INAFM2	0.0339622	1	1520	GroupHCHWA_D	0.520677	2660	6
3.06336	0.671897	0.00429633	LINC01278	0.0401158	1	1717	GroupHCHWA_D	0.488219	2886	5
2.9728	0.671649	0.0120272	RBM24	0.0733157	0	2630	GroupHCHWA_D	0.411894	2724	2
3.46232	0.671372	0.000958287	CASP2	0.0166089	1	925	GroupHCHWA_D	0.488634	4355	5
6.64412	0.671165	0.0100644	QDPR	0.0655373	0	2462	GroupHCHWA_D	0.530551	1653	6
1.22608	0.670191	0.250406	RNU11	0.458898	0	8748	GroupHCHWA_D	0.511111	135	6
1.73957	0.670095	0.0649899	TAS2R3	0.205674	0	5065	GroupHCHWA_D	0.456857	1101	4
10.1567	0.669908	0.0848049	QKI	0.241448	0	5631	GroupHCHWA_D	0.361203	16362	1
4.02609	0.669819	0.0010442	DNAJC2	0.0174381	1	960	GroupHCHWA_D	0.415461	2212	2
3.4584	0.669603	0.012504	MDFIC	0.0750242	0	2672	GroupHCHWA_D	0.387389	5519	1
5.63164	0.66959	4.77108e-05	ZFYVE21	0.00287527	1	265	GroupHCHWA_D	0.537492	1507	6
2.37609	0.669452	0.0396136	AHRR	0.153291	0	4143	GroupHCHWA_D	0.574205	5660	7
1.5088	0.669213	0.201078	S100A8	0.404782	0	7964	GroupHCHWA_D	0.500956	523	5
6.46775	0.669202	0.00541206	PMEPA1	0.0457914	1	1894	GroupHCHWA_D	0.538699	5517	6
5.9901	0.668901	0.0147262	PCBP1	0.0827517	0	2853	GroupHCHWA_D	0.552571	1750	7
3.71721	0.668199	0.0779889	CTSS	0.22988	0	5439	GroupHCHWA_D	0.395422	4107	2
4.51472	0.668149	0.000139838	KDM1B	0.00522584	1	429	GroupHCHWA_D	0.422194	3875	3
4.2047	0.66809	0.0150731	MED10	0.0841992	0	2870	GroupHCHWA_D	0.461089	1028	4
6.04484	0.66787	0.0058032	TLE3	0.0477113	1	1950	GroupHCHWA_D	0.585956	5910	8
2.8735	0.667712	0.059111	ARSJ	0.194159	0	4880	GroupHCHWA_D	0.433519	4678	3
3.66129	0.667007	0.0578134	TNRC6C-AS1	0.191542	0	4838	GroupHCHWA_D	0.536845	3189	6
7.28433	0.666972	9.3551e-05	CACNA1C	0.00414312	1	362	GroupHCHWA_D	0.526149	14169	6
5.63538	0.666073	0.011751	WDR60	0.0722887	0	2606	GroupHCHWA_D	0.481972	3772	5
6.44997	0.665997	0.0430982	HSD17B12	0.160911	0	4294	GroupHCHWA_D	0.397642	2545	2
1.42256	0.665847	0.0936507	RMI2	0.256914	0	5844	GroupHCHWA_D	0.502412	1451	5
6.79546	0.66455	0.0165383	GOLIM4	0.0896054	0	2959	GroupHCHWA_D	0.450428	4327	4
6.13737	0.664443	0.00402375	DEK	0.0385514	1	1672	GroupHCHWA_D	0.373737	2871	1
1.9927	0.664415	0.0272111	NKX3-1	0.121375	0	3594	GroupHCHWA_D	0.470283	3281	4
2.30492	0.664241	0.0381493	LOC574538	0.149794	0	4083	GroupHCHWA_D	0.534435	5808	6
2.35115	0.664116	0.102755	GCH1	0.272024	0	6056	GroupHCHWA_D	0.429402	2925	3
4.27241	0.663135	0.124336	SCARNA5	0.303587	0	6566	GroupHCHWA_D	0.471223	278	4
3.51931	0.662858	0.00903658	GPC4	0.0615701	0	2353	GroupHCHWA_D	0.453419	3714	4
2.14868	0.662658	0.0478541	CCDC183-AS1	0.171382	0	4475	GroupHCHWA_D	0.619028	2386	9
4.2371	0.662423	0.0286435	SLC9A7P1	0.125126	0	3670	GroupHCHWA_D	0.491982	3305	5
0.694637	0.662276	0.157422	LINC00304	0.348975	0	7232	GroupHCHWA_D	0.607222	2243	8
5.00378	0.662078	0.00527938	TEP1	0.0451909	1	1872	GroupHCHWA_D	0.524219	10694	6
0.829548	0.661166	0.090652	LOC100272217	0.251665	0	5774	GroupHCHWA_D	0.471329	2145	4
5.4821	0.660851	4.58914e-05	PPARD	0.00282973	1	260	GroupHCHWA_D	0.578924	4460	8
3.44219	0.660671	0.0053916	ZNF846	0.045662	1	1893	GroupHCHWA_D	0.452883	2133	4
2.85159	0.660495	0.0178477	ZNF436-AS1	0.0935384	0	3059	GroupHCHWA_D	0.517614	2867	6
1.9219	0.660363	0.0771146	GPR4	0.228603	0	5408	GroupHCHWA_D	0.560551	3047	7
5.32799	0.660288	0.0100847	SOX12	0.0655897	0	2465	GroupHCHWA_D	0.621511	4658	9
2.5363	0.659899	0.0773996	ZSCAN23	0.22901	0	5418	GroupHCHWA_D	0.389434	3161	1
5.22634	0.659898	0.0023685	PTPN12	0.0287447	1	1321	GroupHCHWA_D	0.393085	3297	1
5.80789	0.659842	0.0172303	KHDRBS2	0.0915903	0	3016	GroupHCHWA_D	0.421304	2300	2
3.53848	0.659245	0.00128804	TRIM14	0.0195769	1	1054	GroupHCHWA_D	0.538495	4611	6
3.52327	0.659164	0.0222504	PYGL	0.106452	0	3351	GroupHCHWA_D	0.490162	2846	5
4.90497	0.658831	6.42046e-05	CDK11B	0.00335923	1	306	GroupHCHWA_D	0.566246	3170	7
1.29763	0.658783	0.117813	SLCO4A1-AS1	0.294614	0	6411	GroupHCHWA_D	0.593816	1423	8
2.52842	0.658644	0.0201366	ZNF404	0.100492	0	3212	GroupHCHWA_D	0.357763	1842	1
4.27758	0.65796	0.000419973	CSNK2A2	0.0102015	1	660	GroupHCHWA_D	0.50965	1658	6
2.51955	0.656887	0.0768092	RPL23AP7	0.227827	0	5405	GroupHCHWA_D	0.424453	1873	3
1.58814	0.656288	0.0649838	C1orf228	0.205674	0	5064	GroupHCHWA_D	0.547774	1685	7
2.16043	0.655773	0.047412	ZNF547	0.170452	0	4459	GroupHCHWA_D	0.427673	2862	3
4.24816	0.655491	0.00691566	ERO1B	0.0526457	0	2106	GroupHCHWA_D	0.372972	5054	1
3.15154	0.655317	0.0794347	TMEM243	0.232347	0	5481	GroupHCHWA_D	0.413231	1043	2
1.83813	0.655219	0.0254806	SLC50A1	0.11602	0	3521	GroupHCHWA_D	0.536088	1718	6
1.45858	0.655075	0.0286203	LOC654841	0.125059	0	3669	GroupHCHWA_D	0.45044	2502	4
3.33982	0.654815	0.0361709	DNA2	0.144756	0	4006	GroupHCHWA_D	0.381546	4335	1
4.1125	0.654167	0.00281496	NOP2	0.0315265	1	1430	GroupHCHWA_D	0.550151	2981	7
4.75738	0.654052	0.00165109	CTDNEP1	0.0228783	1	1157	GroupHCHWA_D	0.588679	1855	8
7.08645	0.652802	0.0110509	KCNJ4	0.0695869	0	2546	GroupHCHWA_D	0.649859	2122	9
2.20784	0.652623	0.0855661	FBLIM1	0.242753	0	5651	GroupHCHWA_D	0.58256	3773	8
5.71789	0.652588	0.213597	TNC	0.418672	0	8179	GroupHCHWA_D	0.524945	8599	6
1.75459	0.652394	0.151975	LOC728485	0.341434	0	7136	GroupHCHWA_D	0.515119	1885	6
1.34181	0.651712	0.075999	SH2D4A	0.226457	0	5379	GroupHCHWA_D	0.495004	3503	5
3.19015	0.65133	0.0179288	KANTR	0.0937004	0	3067	GroupHCHWA_D	0.53116	2423	6
5.6934	0.651229	0.0248455	RSRP1	0.114263	0	3486	GroupHCHWA_D	0.498294	1465	5
4.40728	0.651035	0.00282961	CEP112	0.0315877	1	1436	GroupHCHWA_D	0.430765	4102	3
1.46928	0.650433	0.0515656	TEX22	0.178707	0	4626	GroupHCHWA_D	0.633606	2571	9
1.16912	0.649973	0.123736	CASS4	0.302999	0	6547	GroupHCHWA_D	0.517188	3258	6
5.47056	0.649746	0.000215628	ADRB1	0.00691391	1	500	GroupHCHWA_D	0.575122	2862	7
6.33959	0.64952	0.0101326	CDK5RAP2	0.0657155	0	2471	GroupHCHWA_D	0.484421	6451	5
2.15361	0.648927	0.0426528	LOC284395	0.160357	0	4264	GroupHCHWA_D	0.536406	2582	6
5.76565	0.648791	0.00361877	ZNF697	0.0363737	1	1595	GroupHCHWA_D	0.499016	5080	5
1.92776	0.648754	0.302538	APOL4	0.513042	0	9454	GroupHCHWA_D	0.486099	3417	5
0.647283	0.648729	0.11495	CBY3	0.290537	0	6343	GroupHCHWA_D	0.658025	810	9
3.43039	0.647632	0.0016254	CHIC2	0.0227585	1	1145	GroupHCHWA_D	0.484348	1150	5
2.69814	0.64744	0.0497287	TRPV6	0.175161	0	4549	GroupHCHWA_D	0.579625	5821	8
1.5501	0.647333	0.0785782	LOC101929595	0.23115	0	5449	GroupHCHWA_D	0.436655	2810	3
5.17317	0.647266	0.00784449	RAB24	0.0566755	0	2219	GroupHCHWA_D	0.584013	1839	8
7.58463	0.647245	0.000638596	CALR	0.0129431	1	791	GroupHCHWA_D	0.540031	1911	7
0.650875	0.647178	0.137176	ABCC2	0.320398	0	6864	GroupHCHWA_D	0.457033	5446	4
2.29203	0.647157	0.103991	PIK3R5	0.273891	0	6087	GroupHCHWA_D	0.574154	4612	7
4.33337	0.646545	0.0208006	MEGF11	0.102136	0	3265	GroupHCHWA_D	0.551728	8767	7
7.66161	0.646375	0.00255518	KTN1	0.0301088	1	1360	GroupHCHWA_D	0.391614	4913	1
0.943737	0.646289	0.0843607	DTX2P1-UPK3BP1-PMS2P11	0.240739	0	5618	GroupHCHWA_D	0.590006	1761	8
2.27301	0.64606	0.0596006	ZNF850	0.195043	0	4899	GroupHCHWA_D	0.418469	7721	2
2.66161	0.64603	0.0569446	MSANTD1	0.189972	0	4805	GroupHCHWA_D	0.602994	1670	8
3.43137	0.645939	0.0199385	ZNF473	0.0999545	0	3198	GroupHCHWA_D	0.480884	4839	5
0.718934	0.645824	0.0924742	TSSK2	0.254757	0	5819	GroupHCHWA_D	0.582048	1816	8
0.396676	0.645589	0.147853	BIN3-IT1	0.335368	0	7068	GroupHCHWA_D	0.537249	1839	6
2.26606	0.644969	0.0937065	SLC19A3	0.257022	0	5845	GroupHCHWA_D	0.450491	3767	4
5.77525	0.644845	0.000109475	VGLL4	0.00454689	1	386	GroupHCHWA_D	0.521731	5108	6
3.49124	0.64467	0.0034548	ZNF844	0.0352785	1	1570	GroupHCHWA_D	0.419548	2834	2
3.15849	0.64451	0.00602568	ZNF829	0.0487651	1	1981	GroupHCHWA_D	0.406327	5247	2
9.01203	0.643822	0.00594617	MAP4K4	0.0483168	1	1973	GroupHCHWA_D	0.469492	7998	4
3.05238	0.643394	0.0368763	SNHG1	0.146646	0	4030	GroupHCHWA_D	0.439177	1118	3
6.31395	0.643254	0.0184085	VHL	0.0952631	0	3098	GroupHCHWA_D	0.469737	4560	4
5.84966	0.642977	0.0252343	RPS16	0.115324	0	3508	GroupHCHWA_D	0.554237	590	7
1.3583	0.642959	0.10252	GNMT	0.271712	0	6049	GroupHCHWA_D	0.592697	1068	8
5.19616	0.642922	0.000865402	STX16	0.0155365	1	893	GroupHCHWA_D	0.471713	4967	4
2.50204	0.642757	0.0410441	CCDC78	0.156656	0	4200	GroupHCHWA_D	0.638113	1611	9
1.36943	0.642338	0.0900162	LINC01125	0.250632	0	5758	GroupHCHWA_D	0.447772	1369	3
3.38054	0.642201	0.104613	CLIC5	0.274754	0	6104	GroupHCHWA_D	0.458268	8279	4
1.24908	0.641987	0.0378779	LINC00535	0.149461	0	4063	GroupHCHWA_D	0.505747	1914	5
1.76931	0.641554	0.0372535	PLEKHA8P1	0.147542	0	4048	GroupHCHWA_D	0.437132	1869	3
3.05707	0.641532	0.0381309	ZNF749	0.149794	0	4081	GroupHCHWA_D	0.461591	2929	4
3.06155	0.641368	0.129559	PENK	0.310429	0	6691	GroupHCHWA_D	0.526167	1414	6
2.8398	0.6413	0.0226338	ADGRD1	0.107579	0	3373	GroupHCHWA_D	0.552192	5384	7
5.3542	0.64118	0.00079294	PAPD5	0.0147392	1	862	GroupHCHWA_D	0.386588	8112	1
5.32431	0.640865	8.16472e-05	WIZ	0.00386126	1	339	GroupHCHWA_D	0.629559	4168	9
3.14428	0.640702	0.00436718	PBX3	0.0405099	1	1727	GroupHCHWA_D	0.463918	3104	4
8.62434	0.640491	0.0171002	SYNM	0.0911708	0	3007	GroupHCHWA_D	0.522094	7355	6
0.958811	0.640459	0.0820262	AATK-AS1	0.23716	0	5544	GroupHCHWA_D	0.63792	1577	9
3.90215	0.640145	0.00962232	GLTSCR1	0.0639368	0	2412	GroupHCHWA_D	0.685834	5739	9
8.44318	0.639768	0.0367625	INA	0.146359	0	4026	GroupHCHWA_D	0.507583	3231	6
8.00153	0.639278	0.000725087	PDZD2	0.0139384	1	834	GroupHCHWA_D	0.51297	11642	6
7.254	0.639082	0.000599715	KIAA1462	0.0124542	1	772	GroupHCHWA_D	0.480323	9300	5
5.50026	0.638799	0.0166092	ZNF219	0.0898076	0	2965	GroupHCHWA_D	0.679126	3478	9
4.81189	0.638786	0.00171457	ZAK	0.0234539	1	1172	GroupHCHWA_D	0.39856	9858	2
4.68649	0.638628	0.0515616	BEND5	0.178707	0	4625	GroupHCHWA_D	0.540292	1849	7
5.57888	0.638624	0.0016543	CALCOCO2	0.022903	1	1158	GroupHCHWA_D	0.440922	3817	3
1.14041	0.638044	0.0644436	VEGFC	0.204821	0	5044	GroupHCHWA_D	0.51582	2086	6
6.26531	0.637904	0.0116311	NEK7	0.0719403	0	2592	GroupHCHWA_D	0.355034	4132	1
1.89954	0.637828	0.0979211	LOC102724919	0.264644	0	5932	GroupHCHWA_D	0.385609	542	1
2.38084	0.637339	0.0639821	SLC44A3	0.203969	0	5029	GroupHCHWA_D	0.472643	2577	4
4.47392	0.637306	0.0328559	RAVER2	0.13623	0	3865	GroupHCHWA_D	0.423756	4361	3
10.9547	0.637246	0.000329247	KIF5A	0.00875207	1	602	GroupHCHWA_D	0.532204	3897	6
7.00315	0.637225	0.000488298	CXXC5	0.0110571	1	708	GroupHCHWA_D	0.625432	1447	9
2.07681	0.637096	0.0224079	CMC1	0.106918	0	3360	GroupHCHWA_D	0.44	625	3
3.97518	0.636673	0.00116958	MOK	0.0184918	1	1014	GroupHCHWA_D	0.515176	3789	6
5.86811	0.636592	0.00314959	ATP6V1G1	0.0334783	1	1507	GroupHCHWA_D	0.414649	1611	2
0.850997	0.636524	0.0717206	ULBP2	0.218214	0	5266	GroupHCHWA_D	0.477273	1408	5
3.47043	0.636446	0.00351286	RFX1	0.0356444	1	1580	GroupHCHWA_D	0.650446	4377	9
2.76866	0.636017	0.0700183	SPAG5-AS1	0.215168	0	5217	GroupHCHWA_D	0.498901	1365	5
3.85726	0.635962	0.0898658	LRRC1	0.25049	0	5751	GroupHCHWA_D	0.440252	3180	3
1.70105	0.635958	0.20381	TMEM215	0.407616	0	8016	GroupHCHWA_D	0.391789	5383	1
3.12907	0.635958	0.150222	CHAC1	0.33903	0	7102	GroupHCHWA_D	0.612821	1560	8
3.97143	0.635862	0.00197621	VASP	0.0258844	1	1224	GroupHCHWA_D	0.59345	2290	8
1.66189	0.635687	0.116352	C6orf163	0.292557	0	6375	GroupHCHWA_D	0.398006	1304	2
6.29191	0.635627	0.000292457	ZMIZ2	0.00829852	1	565	GroupHCHWA_D	0.616049	5209	9
0.984916	0.635452	0.100558	SRPX2	0.268826	0	5997	GroupHCHWA_D	0.507306	2190	6
6.36742	0.635325	0.00300989	CAPN2	0.0327186	1	1473	GroupHCHWA_D	0.503086	3727	5
3.04004	0.635112	0.0471214	ANKRD30B	0.169764	0	4450	GroupHCHWA_D	0.395712	4617	2
1.07844	0.635017	0.103222	ABHD16B	0.272703	0	6067	GroupHCHWA_D	0.676802	1776	9
2.71748	0.63493	0.0234641	LOC100294362	0.109981	0	3420	GroupHCHWA_D	0.548945	3698	7
2.61815	0.634889	0.0847998	CMKLR1	0.241448	0	5630	GroupHCHWA_D	0.506056	5614	5
6.24277	0.634855	0.0347339	SLC39A14	0.140666	0	3958	GroupHCHWA_D	0.48566	5300	5
6.55567	0.634125	0.00110339	ULK1	0.0178891	1	988	GroupHCHWA_D	0.640751	5222	9
4.527	0.633675	0.00141129	IPO5P1	0.0206774	1	1094	GroupHCHWA_D	0.470417	5510	4
2.82982	0.633485	0.0806314	DZIP1L	0.234826	0	5503	GroupHCHWA_D	0.555641	3909	7
4.32171	0.633439	0.0375088	ELN	0.148369	0	4053	GroupHCHWA_D	0.615154	3999	8
0.99814	0.633188	0.191097	CCDC144NL	0.391623	0	7823	GroupHCHWA_D	0.413756	2806	2
4.14423	0.632908	0.0529116	SMAD6	0.181761	0	4666	GroupHCHWA_D	0.632226	3010	9
6.16668	0.632652	0.0423227	TTN	0.159689	0	4249	GroupHCHWA_D	0.436155	116853	3
4.47047	0.632613	0.00861811	KLHL25	0.0598638	0	2308	GroupHCHWA_D	0.619061	3683	9
3.63022	0.632611	0.0145805	LDOC1	0.0820943	0	2845	GroupHCHWA_D	0.588155	1469	8
4.94332	0.632423	0.0248149	POU3F2	0.114207	0	3483	GroupHCHWA_D	0.483729	4087	5
4.1543	0.632353	0.023127	TDRP	0.109019	0	3401	GroupHCHWA_D	0.431785	3423	3
2.56242	0.632333	0.0482979	CCT6P1	0.172525	0	4488	GroupHCHWA_D	0.42752	1766	3
2.68932	0.632306	0.0624787	FGR	0.200652	0	4992	GroupHCHWA_D	0.573026	2773	7
1.18478	0.632295	0.0429725	NDUFV2-AS1	0.160785	0	4284	GroupHCHWA_D	0.527811	845	6
5.56993	0.631724	0.0060922	PRDX6	0.0489834	1	1991	GroupHCHWA_D	0.438323	1670	3
1.89949	0.631294	0.0406371	HIGD1B	0.155785	0	4182	GroupHCHWA_D	0.534556	709	6
1.28503	0.630402	0.160203	GIMAP2	0.352798	0	7280	GroupHCHWA_D	0.405687	1442	2
3.21344	0.630338	0.00908485	RABL2B	0.0616632	0	2362	GroupHCHWA_D	0.522554	2616	6
3.78988	0.630308	0.0128243	PUS1	0.0760845	0	2702	GroupHCHWA_D	0.625841	2082	9
6.7501	0.630166	0.000166681	NAV2	0.00591203	1	452	GroupHCHWA_D	0.521772	11758	6
5.80006	0.629268	0.0550829	APOD	0.186227	0	4742	GroupHCHWA_D	0.492035	1130	5
0.863861	0.628915	0.147469	LOC100134368	0.334923	0	7059	GroupHCHWA_D	0.581795	1571	8
6.82762	0.628307	0.0033058	RPS3	0.0342811	1	1546	GroupHCHWA_D	0.443918	2746	3
0.92614	0.628208	0.16736	LINC01336	0.362533	0	7401	GroupHCHWA_D	0.496255	534	5
6.65439	0.62801	7.93119e-05	AFF3	0.00379561	1	335	GroupHCHWA_D	0.485022	8212	5
3.28744	0.627954	0.0899801	ARHGEF26-AS1	0.250609	0	5756	GroupHCHWA_D	0.368745	2598	1
5.52652	0.62743	0.00115531	TMED9	0.0184115	1	1006	GroupHCHWA_D	0.56425	1393	7
4.41654	0.627379	0.000123494	ZNF865	0.00484777	1	407	GroupHCHWA_D	0.659325	4949	9
7.2401	0.62735	0.000295913	ELAVL3	0.00832295	1	570	GroupHCHWA_D	0.578385	4682	8
5.83537	0.62666	0.00131223	SUGT1	0.0197909	1	1063	GroupHCHWA_D	0.417133	1786	2
0.587045	0.626532	0.202082	PGLYRP1	0.405885	0	7982	GroupHCHWA_D	0.637224	951	9
0.919602	0.626073	0.0804961	PLP2	0.234596	0	5501	GroupHCHWA_D	0.533397	1048	6
3.0821	0.625644	0.021003	EVA1B	0.102878	0	3273	GroupHCHWA_D	0.679518	1245	9
1.73691	0.625371	0.0814055	TMEM100	0.236088	0	5528	GroupHCHWA_D	0.423367	2388	3
5.79378	0.625242	0.000695848	H2AFZ	0.0136588	1	816	GroupHCHWA_D	0.456177	947	4
4.41859	0.625224	0.0195306	TAF13	0.0986529	0	3173	GroupHCHWA_D	0.393414	577	1
2.57444	0.625031	0.0293117	PUS10	0.126775	0	3705	GroupHCHWA_D	0.368766	3810	1
5.16183	0.624996	0.0113146	KANK2	0.0706373	0	2568	GroupHCHWA_D	0.58104	5232	8
7.37577	0.624915	0.000745659	ACTN1	0.0141976	1	842	GroupHCHWA_D	0.553152	3791	7
2.42264	0.62488	0.0607475	PABPC3	0.197346	0	4935	GroupHCHWA_D	0.434335	2429	3
0.795916	0.624714	0.101568	LOC100505938	0.27031	0	6024	GroupHCHWA_D	0.515377	1073	6
7.67515	0.624681	0.00620598	PFKFB3	0.0492058	1	2022	GroupHCHWA_D	0.565584	4864	7
5.29487	0.624285	0.000359124	EIF3J	0.00910993	1	632	GroupHCHWA_D	0.385848	2558	1
4.02046	0.624181	0.00741365	ACVR1	0.0548438	0	2167	GroupHCHWA_D	0.45437	3112	4
5.85857	0.623686	0.0113935	ARRDC3	0.0710466	0	2571	GroupHCHWA_D	0.375391	4161	1
0.515341	0.623616	0.322944	ESPNL	0.53325	0	9709	GroupHCHWA_D	0.667773	4822	9
7.75676	0.623534	0.000125024	SPEN	0.00487111	1	411	GroupHCHWA_D	0.516643	12227	6
1.23976	0.623525	0.12861	ZMIZ1-AS1	0.309484	0	6661	GroupHCHWA_D	0.503494	2433	5
4.0487	0.623499	0.00608422	HAUS3	0.0489834	1	1987	GroupHCHWA_D	0.399589	2435	2
2.10135	0.62347	0.0474805	KDELC1	0.170598	0	4462	GroupHCHWA_D	0.457997	2107	4
2.55416	0.623288	0.0625978	NUTM2A-AS1	0.200915	0	4995	GroupHCHWA_D	0.520681	822	6
8.63065	0.622707	0.000146715	JUND	0.00537555	1	437	GroupHCHWA_D	0.69893	1963	9
5.00725	0.622601	0.00040347	FBXO30	0.00993615	1	651	GroupHCHWA_D	0.375312	4407	1
1.05227	0.622314	0.115416	C1QTNF7	0.291108	0	6356	GroupHCHWA_D	0.405042	4839	2
7.15463	0.62228	0.00687305	ZNF316	0.0523711	0	2104	GroupHCHWA_D	0.629645	7239	9
2.71952	0.621991	0.071389	ADAM20	0.217764	0	5255	GroupHCHWA_D	0.42586	2792	3
2.49012	0.621982	0.1184	PLIN1	0.295485	0	6424	GroupHCHWA_D	0.559231	2963	7
2.56832	0.621801	0.114289	COL14A1	0.289732	0	6323	GroupHCHWA_D	0.466739	6464	4
2.40667	0.621793	0.0557486	EMCN	0.187376	0	4769	GroupHCHWA_D	0.361407	4037	1
6.14893	0.621751	0.00984007	RMDN3	0.0646281	0	2440	GroupHCHWA_D	0.54526	2331	7
5.0811	0.621555	0.0397845	CCDC88B	0.153656	0	4151	GroupHCHWA_D	0.674593	4920	9
4.78536	0.621466	0.00438044	TMX1	0.0405544	1	1731	GroupHCHWA_D	0.346819	4103	1
4.96633	0.621147	0.0149497	ARL10	0.0837435	0	2862	GroupHCHWA_D	0.550936	2405	7
5.80597	0.620737	0.0013297	FERMT2	0.0199418	1	1069	GroupHCHWA_D	0.409183	3441	2
5.41895	0.620712	0.00196679	FBXL14	0.0257974	1	1222	GroupHCHWA_D	0.56703	2111	7
0.542514	0.620678	0.247022	FXYD3	0.455674	0	8691	GroupHCHWA_D	0.538263	2326	6
3.48117	0.620527	0.0450215	IRAK3	0.165077	0	4372	GroupHCHWA_D	0.404511	8336	2
4.23711	0.620397	0.10844	HIF3A	0.280526	0	6197	GroupHCHWA_D	0.548483	6394	7
1.18817	0.620327	0.135209	LOC101929625	0.3177	0	6823	GroupHCHWA_D	0.465608	567	4
5.673	0.620099	0.0569043	PLCXD1	0.189972	0	4801	GroupHCHWA_D	0.539349	10750	6
7.19783	0.619645	0.00665077	ZBTB16	0.0515097	0	2070	GroupHCHWA_D	0.602474	2425	8
4.41511	0.619613	0.0143836	TERF1	0.0813111	0	2836	GroupHCHWA_D	0.390878	2960	1
6.41966	0.619562	0.0305761	ATP1B2	0.130267	0	3763	GroupHCHWA_D	0.541268	3453	7
2.07577	0.619489	0.0436119	SMG1P2	0.161906	0	4317	GroupHCHWA_D	0.42195	7745	2
6.15921	0.619464	0.00906395	PKD2	0.061596	0	2357	GroupHCHWA_D	0.449104	5079	4
4.07552	0.619233	0.0024114	RREB1	0.0290473	1	1330	GroupHCHWA_D	0.555194	8905	7
7.65246	0.619129	0.0078875	DYNLL2	0.0567902	0	2225	GroupHCHWA_D	0.526938	1522	6
3.03153	0.619032	0.248218	CNTNAP3B	0.456985	0	8708	GroupHCHWA_D	0.477729	6376	5
3.38291	0.618947	0.00991656	GLIS2	0.0648642	0	2451	GroupHCHWA_D	0.644804	7410	9
6.45007	0.618853	0.00912691	RBFOX3	0.0618439	0	2366	GroupHCHWA_D	0.608361	2990	8
4.05531	0.618749	0.00813161	DGKA	0.0577352	0	2258	GroupHCHWA_D	0.519804	3055	6
0.690967	0.618749	0.183195	GOLGA6L10	0.381923	0	7690	GroupHCHWA_D	0.424848	8902	3
2.74151	0.618572	0.0221638	LOC283335	0.106132	0	3348	GroupHCHWA_D	0.537548	2863	6
3.80266	0.618428	0.0196398	RRP7BP	0.0989831	0	3181	GroupHCHWA_D	0.593264	2316	8
5.41531	0.618285	0.000972458	CDK10	0.01671	1	933	GroupHCHWA_D	0.610679	1798	8
2.33598	0.618108	0.0435439	TEFM	0.161859	0	4313	GroupHCHWA_D	0.404033	1339	2
5.37429	0.617564	0.0142595	NR1D1	0.0809518	0	2824	GroupHCHWA_D	0.594234	2775	8
1.61655	0.617475	0.0806483	CFAP58-AS1	0.234826	0	5506	GroupHCHWA_D	0.426728	1085	3
5.99768	0.617135	0.00190241	DDX46	0.025227	1	1209	GroupHCHWA_D	0.389677	5851	1
3.16102	0.616898	0.0774079	PHYHD1	0.22901	0	5419	GroupHCHWA_D	0.570894	2137	7
3.91037	0.616859	0.00501545	GABPB2	0.043795	1	1836	GroupHCHWA_D	0.473118	1953	4
3.03425	0.616808	0.0047936	SLC16A10	0.0426226	1	1801	GroupHCHWA_D	0.465929	2891	4
2.89981	0.616501	0.0112052	NPHP1	0.0701998	0	2559	GroupHCHWA_D	0.417303	2751	2
4.74614	0.616398	0.0062505	TGFBR2	0.0493688	1	2029	GroupHCHWA_D	0.473528	4703	4
5.82721	0.61632	0.0182216	MICALL2	0.0946933	0	3085	GroupHCHWA_D	0.658922	3099	9
3.74766	0.616188	0.0250201	ZNF804A	0.114716	0	3495	GroupHCHWA_D	0.426467	4685	3
5.25113	0.616158	0.00215806	NEK6	0.027307	1	1267	GroupHCHWA_D	0.550107	3263	7
3.31779	0.615978	0.00633488	PRR14	0.0497603	1	2041	GroupHCHWA_D	0.621341	2118	9
4.73233	0.615378	0.0630953	PLSCR4	0.202107	0	5005	GroupHCHWA_D	0.405849	3659	2
6.32914	0.615219	0.000129728	PRPF4B	0.00496373	1	419	GroupHCHWA_D	0.368752	7482	1
4.10282	0.615195	0.0182957	PAX6	0.0948355	0	3092	GroupHCHWA_D	0.432943	9477	3
4.78404	0.614864	0.000335824	NCOA5	0.00885516	1	608	GroupHCHWA_D	0.518553	3207	6
2.75782	0.6148	0.0151333	HEBP1	0.0844179	0	2874	GroupHCHWA_D	0.51904	1208	6
4.96517	0.614605	0.000675223	POM121C	0.0134642	1	804	GroupHCHWA_D	0.568333	5861	7
6.66497	0.614577	0.00305592	MMP17	0.032903	1	1489	GroupHCHWA_D	0.687708	2408	9
3.01502	0.614556	0.05387	CRYBB2P1	0.184107	0	4691	GroupHCHWA_D	0.505663	1501	5
3.52835	0.614398	0.0118924	HIST1H2BD	0.0728262	0	2618	GroupHCHWA_D	0.470383	861	4
4.63824	0.614075	0.0201851	TBCA	0.100655	0	3215	GroupHCHWA_D	0.33347	2447	1
3.33816	0.614059	0.0142394	SPCS2	0.0808949	0	2822	GroupHCHWA_D	0.385894	2708	1
4.61728	0.613957	0.180044	PWAR1	0.378056	0	7635	GroupHCHWA_D	0.385158	2412	1
4.37978	0.613899	0.0138714	ZC3HAV1	0.0797941	0	2787	GroupHCHWA_D	0.441225	7869	3
2.5387	0.61372	0.131649	F12	0.313279	0	6736	GroupHCHWA_D	0.647977	2051	9
1.94949	0.613682	0.0670966	KCNJ14	0.209768	0	5128	GroupHCHWA_D	0.558401	2851	7
6.65638	0.613383	0.000302755	MLLT1	0.00839227	1	578	GroupHCHWA_D	0.634184	4505	9
5.16608	0.613236	0.00996157	CTSZ	0.0650525	0	2455	GroupHCHWA_D	0.582	1500	8
7.31805	0.612838	0.000579611	PURA	0.0122107	1	761	GroupHCHWA_D	0.399509	5294	2
3.95215	0.612462	0.0282469	RAI14	0.124166	0	3647	GroupHCHWA_D	0.446038	5856	3
0.644704	0.6121	0.139613	CORT	0.323884	0	6910	GroupHCHWA_D	0.469537	1231	4
2.28957	0.61112	0.0575848	ZNF582	0.191139	0	4830	GroupHCHWA_D	0.407488	2297	2
3.05099	0.610894	0.0319643	LOC553103	0.13429	0	3816	GroupHCHWA_D	0.527747	1802	6
3.44326	0.610191	0.0179966	NOB1	0.0939198	0	3072	GroupHCHWA_D	0.544225	1775	7
4.55464	0.610145	0.000558404	VPS37B	0.0119047	1	752	GroupHCHWA_D	0.591852	2749	8
1.69172	0.61009	0.0702041	EZH2	0.215533	0	5222	GroupHCHWA_D	0.464097	3036	4
4.70354	0.610085	0.0130767	TWSG1	0.0772175	0	2715	GroupHCHWA_D	0.355431	3756	1
5.17271	0.609984	0.00069606	ABHD13	0.0136588	1	817	GroupHCHWA_D	0.338551	5302	1
9.40238	0.60964	0.00479467	MPRIP	0.0426226	1	1803	GroupHCHWA_D	0.512746	11023	6
3.8333	0.609593	0.0907714	NKAIN1	0.251816	0	5779	GroupHCHWA_D	0.593771	2922	8
5.78612	0.60956	0.000106272	CDC73	0.00444917	1	382	GroupHCHWA_D	0.348375	5939	1
3.61787	0.609491	0.0187399	AFG3L1P	0.0962516	0	3120	GroupHCHWA_D	0.550858	3903	7
4.86469	0.608999	0.00852962	ANAPC16	0.0595285	0	2296	GroupHCHWA_D	0.445783	3569	3
1.86496	0.608564	0.111347	GIMAP7	0.285481	0	6253	GroupHCHWA_D	0.406835	1229	2
8.00376	0.608449	4.50625e-05	MICAL3	0.00280002	1	258	GroupHCHWA_D	0.551645	14774	7
4.5874	0.60841	0.00326316	PTPN21	0.0340024	1	1535	GroupHCHWA_D	0.489139	6215	5
4.40595	0.60831	0.00112428	B3GALNT2	0.0180763	1	997	GroupHCHWA_D	0.424701	5611	3
4.09646	0.608282	0.00445247	CCPG1	0.0408841	1	1744	GroupHCHWA_D	0.397065	7223	2
3.35168	0.607984	0.0111671	L3HYPDH	0.070071	0	2555	GroupHCHWA_D	0.5105	1381	6
2.78243	0.607919	0.0914382	CD68	0.252906	0	5796	GroupHCHWA_D	0.553341	1856	7
3.395	0.607914	0.0902307	ZNF587B	0.251098	0	5761	GroupHCHWA_D	0.454192	3340	4
6.31386	0.60759	0.025781	NES	0.116823	0	3538	GroupHCHWA_D	0.593019	5558	8
5.64477	0.607347	0.00369746	LINC01000	0.0368719	1	1607	GroupHCHWA_D	0.562701	10263	7
2.63519	0.60716	0.022021	TMEM86B	0.105796	0	3337	GroupHCHWA_D	0.631639	1751	9
4.96935	0.606914	0.0054535	PPID	0.0459888	1	1901	GroupHCHWA_D	0.425845	1834	3
4.45436	0.606595	0.0429139	CRHR1-IT1	0.160709	0	4281	GroupHCHWA_D	0.464209	8382	4
1.12019	0.606117	0.12241	MEIKIN	0.300762	0	6525	GroupHCHWA_D	0.422436	1560	3
5.32247	0.606081	0.000225157	SPATA2	0.00711706	1	506	GroupHCHWA_D	0.52381	4305	6
3.33047	0.605889	0.041141	GLUD1P3	0.156892	0	4204	GroupHCHWA_D	0.598919	4069	8
3.35165	0.60556	0.00844386	TMEM80	0.0591144	0	2290	GroupHCHWA_D	0.594546	2237	8
6.73171	0.60518	0.00128755	ACIN1	0.0195769	1	1053	GroupHCHWA_D	0.534318	5143	6
3.57173	0.604836	0.0428048	NPTN-IT1	0.160501	0	4275	GroupHCHWA_D	0.449731	2606	4
5.5501	0.604751	0.00511663	ZNF680	0.0444086	1	1846	GroupHCHWA_D	0.321458	4912	1
2.6752	0.604584	0.0613422	MIR31HG	0.198554	0	4953	GroupHCHWA_D	0.472533	2148	4
3.806	0.6045	0.00454165	LRRC37B	0.0413703	1	1760	GroupHCHWA_D	0.468956	3028	4
3.93103	0.604452	0.00102893	RAVER1	0.0172975	1	952	GroupHCHWA_D	0.641147	3592	9
0.658075	0.60436	0.158869	LOC100505549	0.350889	0	7258	GroupHCHWA_D	0.413219	1982	2
3.68882	0.604312	0.108046	ANKRD18A	0.280064	0	6185	GroupHCHWA_D	0.381487	3738	1
3.32224	0.60384	0.107612	POP1	0.279617	0	6170	GroupHCHWA_D	0.466569	4771	4
8.08644	0.603807	0.00969421	PTP4A2	0.0641481	0	2422	GroupHCHWA_D	0.424536	3929	3
4.0441	0.603683	0.0134667	MIPOL1	0.078594	0	2747	GroupHCHWA_D	0.334168	6386	1
0.805428	0.60364	0.0882957	ZNF252P-AS1	0.247562	0	5718	GroupHCHWA_D	0.486712	3236	5
2.56468	0.603456	0.0468956	PKN3	0.169483	0	4435	GroupHCHWA_D	0.644063	3377	9
1.95323	0.603099	0.0820537	TFPI	0.237195	0	5546	GroupHCHWA_D	0.348551	4140	1
8.09509	0.603036	0.0660277	NEFH	0.207633	0	5098	GroupHCHWA_D	0.579726	3719	8
6.58593	0.602965	0.000178741	RRAGD	0.00611881	1	467	GroupHCHWA_D	0.420422	4926	2
2.39684	0.602722	0.050881	C19orf71	0.17737	0	4599	GroupHCHWA_D	0.669151	671	9
4.97625	0.602593	0.00322845	KANSL1L	0.0339622	1	1524	GroupHCHWA_D	0.389838	4743	1
1.89623	0.602133	0.0809954	KIAA2012	0.235394	0	5516	GroupHCHWA_D	0.515761	4029	6
2.6272	0.601925	0.0689048	RAB30-AS1	0.213525	0	5170	GroupHCHWA_D	0.395245	673	2
4.60997	0.601906	0.00111093	USP28	0.0179722	1	991	GroupHCHWA_D	0.435947	4668	3
3.67442	0.60188	0.029186	SLC16A3	0.126565	0	3697	GroupHCHWA_D	0.654311	2482	9
1.61446	0.601537	0.219488	LOC643711	0.425083	0	8278	GroupHCHWA_D	0.394023	4350	1
6.81838	0.601313	0.000987114	OLFM2	0.0168894	1	937	GroupHCHWA_D	0.620138	2314	9
3.29069	0.601188	0.0207215	SH2B2	0.102123	0	3251	GroupHCHWA_D	0.681777	2206	9
2.04937	0.60109	0.0924916	EFCAB13	0.254757	0	5820	GroupHCHWA_D	0.366674	4699	1
5.90274	0.601035	0.00300938	TOB2	0.0327186	1	1472	GroupHCHWA_D	0.541073	4565	7
4.01931	0.600934	0.00266324	HSP90B2P	0.0306907	1	1391	GroupHCHWA_D	0.406977	2752	2
2.8612	0.600331	0.00795644	CCDC107	0.0569708	0	2239	GroupHCHWA_D	0.577107	1258	8
5.28074	0.600137	0.000163188	PNRC2	0.00580096	1	451	GroupHCHWA_D	0.382353	2414	1
3.13197	0.599975	0.0100244	GNB1L	0.0653566	0	2459	GroupHCHWA_D	0.660303	1519	9
3.07282	0.59965	0.11334	SRGAP2B	0.288468	0	6299	GroupHCHWA_D	0.404552	6810	2
4.3099	0.599243	0.00300187	DOCK6	0.0327186	1	1469	GroupHCHWA_D	0.615469	6400	8
7.68244	0.599203	0.00402283	LRIG1	0.0385514	1	1671	GroupHCHWA_D	0.5231	4762	6
9.48766	0.599124	0.0216118	SLC1A3	0.104709	0	3309	GroupHCHWA_D	0.424429	4863	3
5.26517	0.599073	0.00147123	KSR1	0.0211541	1	1115	GroupHCHWA_D	0.559786	4491	7
4.40705	0.598993	0.00567162	PKNOX1	0.047062	1	1930	GroupHCHWA_D	0.451233	5352	4
2.0477	0.598971	0.0662701	C8orf88	0.208077	0	5106	GroupHCHWA_D	0.414055	1053	2
3.14179	0.598889	0.0114655	PCGF2	0.071329	0	2577	GroupHCHWA_D	0.5649	5208	7
6.72185	0.598765	0.00498908	SAMD4A	0.0436632	1	1831	GroupHCHWA_D	0.477663	7051	5
6.75993	0.598265	0.00356719	CUX2	0.0360588	1	1586	GroupHCHWA_D	0.573035	6846	7
0.831736	0.598254	0.109914	CPO	0.282984	0	6227	GroupHCHWA_D	0.46402	1209	4
1.39807	0.598082	0.0773071	ARHGEF7-AS2	0.228796	0	5417	GroupHCHWA_D	0.535916	1239	6
5.35387	0.598045	0.00122984	PROSC	0.0191797	1	1028	GroupHCHWA_D	0.454652	2569	4
3.08531	0.598027	0.0152594	C16orf46	0.0849143	0	2881	GroupHCHWA_D	0.478437	2226	5
3.54529	0.597859	0.042423	CASC10	0.159872	0	4254	GroupHCHWA_D	0.622926	1989	9
3.30103	0.597839	0.232704	FAM155A-IT1	0.439838	0	8482	GroupHCHWA_D	0.387936	1807	1
2.98296	0.597627	0.0416761	BMP2	0.158105	0	4226	GroupHCHWA_D	0.485079	3150	5
3.91363	0.597574	0.0696385	FRG1B	0.21466	0	5201	GroupHCHWA_D	0.413319	946	2
4.19185	0.59753	0.00410964	PM20D2	0.0390319	1	1688	GroupHCHWA_D	0.399661	4714	2
3.03489	0.597014	0.0396028	ACER2	0.153286	0	4142	GroupHCHWA_D	0.473703	2852	4
3.58507	0.596693	0.016977	ZNF567	0.0907854	0	2998	GroupHCHWA_D	0.37671	2851	1
4.81248	0.596419	0.00946251	RAB2B	0.063368	0	2394	GroupHCHWA_D	0.433045	3002	3
5.22933	0.596287	0.0083273	TPST2	0.0585917	0	2278	GroupHCHWA_D	0.578313	2075	8
2.31257	0.596151	0.127541	CCT6P3	0.308268	0	6633	GroupHCHWA_D	0.426916	2244	3
2.51905	0.595974	0.0418508	SQRDL	0.158505	0	4233	GroupHCHWA_D	0.52547	2179	6
5.44745	0.595855	0.000547234	KLHL29	0.0117438	1	746	GroupHCHWA_D	0.568253	5084	7
3.34067	0.595642	0.000733157	ZNF764	0.014043	1	837	GroupHCHWA_D	0.587983	2796	8
4.82444	0.595551	0.00445258	ZNF493	0.0408841	1	1746	GroupHCHWA_D	0.351528	6284	1
2.76245	0.59512	0.103403	VWA2	0.272837	0	6076	GroupHCHWA_D	0.498037	5857	5
3.49503	0.594982	0.0360215	POPDC3	0.144428	0	3998	GroupHCHWA_D	0.430141	1911	3
4.94162	0.594923	0.0012569	CLASRP	0.0193737	1	1039	GroupHCHWA_D	0.634942	2238	9
5.60372	0.594836	4.2081e-05	FAM193A	0.00266657	1	253	GroupHCHWA_D	0.530734	5206	6
4.63899	0.59456	0.0862101	APOL6	0.243892	0	5665	GroupHCHWA_D	0.403393	10139	2
4.42771	0.594124	0.0211011	UTP3	0.103047	0	3282	GroupHCHWA_D	0.448143	2073	3
0.45891	0.594087	0.150212	ZNF350-AS1	0.33903	0	7101	GroupHCHWA_D	0.522039	726	6
5.45911	0.593903	0.00103087	RAMP1	0.0172975	1	955	GroupHCHWA_D	0.661191	974	9
1.82697	0.593864	0.12782	KCNMB3	0.308569	0	6641	GroupHCHWA_D	0.459514	3495	4
4.09641	0.593586	0.0336914	ACSS3	0.138153	0	3909	GroupHCHWA_D	0.452028	3033	4
1.79918	0.593277	0.0410498	ZIM2-AS1	0.156656	0	4201	GroupHCHWA_D	0.401209	2151	2
4.56553	0.593204	0.02024	PELI2	0.100793	0	3218	GroupHCHWA_D	0.423455	5696	3
1.62655	0.593063	0.0723428	CEACAM19	0.219244	0	5290	GroupHCHWA_D	0.58363	2248	8
2.30838	0.592676	0.0742749	ASGR1	0.22341	0	5330	GroupHCHWA_D	0.59375	1504	8
3.36613	0.592633	0.0266231	LYN	0.119726	0	3565	GroupHCHWA_D	0.449014	4158	4
4.3302	0.592494	0.0644539	IL4R	0.204821	0	5045	GroupHCHWA_D	0.576913	3933	8
4.89244	0.591761	0.0154326	GALNT10	0.0856406	0	2889	GroupHCHWA_D	0.519731	5955	6
6.73799	0.591657	0.033836	CROCC	0.138524	0	3916	GroupHCHWA_D	0.669772	6656	9
2.70143	0.591633	0.0163013	PPP1R3B	0.0887144	0	2945	GroupHCHWA_D	0.470387	5859	4
2.40598	0.59142	0.0321168	LINC00623	0.134566	0	3826	GroupHCHWA_D	0.458311	3694	4
5.003	0.591324	0.000772434	PRPF38A	0.014569	1	850	GroupHCHWA_D	0.426046	2772	3
1.5157	0.591148	0.0498962	LINC01141	0.175501	0	4558	GroupHCHWA_D	0.510441	3783	6
5.87056	0.590715	0.000716019	PAK2	0.0138304	1	830	GroupHCHWA_D	0.399576	6139	2
0.961762	0.590698	0.128832	MANEA-AS1	0.309691	0	6666	GroupHCHWA_D	0.332368	2416	1
5.3747	0.589889	0.00112298	SHISA9	0.018076	1	996	GroupHCHWA_D	0.463683	9899	4
2.11149	0.589777	0.0891567	C1RL-AS1	0.249384	0	5731	GroupHCHWA_D	0.511571	5272	6
0.414267	0.589663	0.186242	LMNTD2	0.38565	0	7742	GroupHCHWA_D	0.688275	4196	9
5.74279	0.589332	0.00928143	CFAP36	0.0624685	0	2382	GroupHCHWA_D	0.443962	1383	3
5.27765	0.589114	0.161274	NWD1	0.354217	0	7299	GroupHCHWA_D	0.527074	8403	6
1.35125	0.588868	0.0993843	TMEM133	0.266979	0	5968	GroupHCHWA_D	0.37069	1856	1
6.6618	0.588785	0.00402505	SHANK2	0.0385514	1	1673	GroupHCHWA_D	0.517763	10837	6
2.20962	0.588563	0.084946	NTN3	0.241678	0	5635	GroupHCHWA_D	0.71853	1986	9
4.00222	0.58833	0.0512461	CCNYL1	0.1781	0	4613	GroupHCHWA_D	0.436461	3911	3
5.09017	0.588174	0.0454728	NUDT11	0.166177	0	4387	GroupHCHWA_D	0.428631	2396	3
5.04805	0.588173	0.00362864	PLEKHA3	0.0364457	1	1596	GroupHCHWA_D	0.425273	2469	3
1.13848	0.587975	0.104068	LOC100289333	0.274004	0	6089	GroupHCHWA_D	0.5	374	5
4.38305	0.587889	0.0243235	TMEM161B-AS1	0.112765	0	3458	GroupHCHWA_D	0.449317	1391	4
2.93068	0.587529	0.00620521	PRRG3	0.0492058	1	2021	GroupHCHWA_D	0.54994	1662	7
3.72334	0.587204	0.051813	LOC283683	0.179216	0	4635	GroupHCHWA_D	0.425606	1445	3
3.25199	0.587187	0.032187	RFX2	0.134732	0	3830	GroupHCHWA_D	0.593628	4112	8
0.88782	0.586879	0.215051	KDELR3	0.420093	0	8207	GroupHCHWA_D	0.44884	1896	4
2.9635	0.586859	0.0118402	GNG11	0.0726454	0	2613	GroupHCHWA_D	0.493711	954	5
6.42034	0.586671	0.0108523	GNA13	0.0686637	0	2533	GroupHCHWA_D	0.389342	6493	1
3.05962	0.586489	0.0328678	GNA14	0.13623	0	3868	GroupHCHWA_D	0.474107	2491	4
5.71355	0.586407	0.000316644	ZNF37A	0.00858958	1	591	GroupHCHWA_D	0.411581	7029	2
2.57941	0.586141	0.282647	CITED1	0.494101	0	9171	GroupHCHWA_D	0.611626	1617	8
2.64532	0.586096	0.0308832	NHEJ1	0.131088	0	3777	GroupHCHWA_D	0.490252	2103	5
0.867947	0.585553	0.218116	SULT1A2	0.423396	0	8259	GroupHCHWA_D	0.58226	1398	8
6.26482	0.585169	0.135444	ADAMTS1	0.317881	0	6831	GroupHCHWA_D	0.503978	4651	5
1.44401	0.584513	0.12216	LOC145474	0.300416	0	6517	GroupHCHWA_D	0.379273	1843	1
8.28376	0.584504	0.00279136	SYT7	0.0313383	1	1428	GroupHCHWA_D	0.587722	6532	8
5.29439	0.584393	0.00163789	ZFAND3	0.022794	1	1152	GroupHCHWA_D	0.557156	3333	7
4.82657	0.584297	0.0144225	GDPD1	0.0815023	0	2837	GroupHCHWA_D	0.407899	3469	2
2.34194	0.584098	0.062096	RASA4B	0.200183	0	4973	GroupHCHWA_D	0.64889	5588	9
4.84487	0.584014	0.00420654	POLR1D	0.0396003	1	1703	GroupHCHWA_D	0.47649	3020	5
4.27462	0.583827	0.00592652	ZNF577	0.0482494	1	1969	GroupHCHWA_D	0.435822	3389	3
4.21753	0.583237	0.0682705	KNOP1	0.212238	0	5157	GroupHCHWA_D	0.487692	1950	5
2.84434	0.58277	0.0759267	GPR158-AS1	0.226349	0	5377	GroupHCHWA_D	0.457049	2433	4
[truncated: 14,033 more rows]
